# Supplementary material for: Enantioselective modular synthesis of α-aryl-α-heteroaryl aminonitriles with parts per million organocatalyst loading: mechanistic investigation for stereochemical origins
Source: Royal Society of Chemistry journal article supplement (doi:10.1039/d4qo02362e), 2025-01-01

*Supplementary Information*

**Enantioselective Modular Synthesis of  $\alpha$ -Aryl- $\alpha$ -Heteroaryl Aminonitriles with Parts per Million Organocatalyst Loading: Mechanistic Investigation for Stereochemical Origins**

Yusuke Oyamada,<sup>[a]</sup> Kaito Ishikawa,<sup>[a]</sup> Tsunayoshi Takehara,<sup>[b]</sup> Takeyuki Suzuki,<sup>[b]</sup> and  
Shuichi Nakamura\*<sup>[a]</sup>

*[a] Department of Life Science and Applied Chemistry, Graduate School of Engineering,  
Nagoya Institute of Technology  
Gokiso, Showa-ku, Nagoya 466-8555, Japan  
E-mail: snakamur@nitech.ac.jp; Tel & Fax: 81-52-735-5245*

*[b] The Institute of Scientific and Industrial Research,  
Osaka University, Ibaraki-shi, Osaka 567-0047, Japan*

## Table of Contents

|                                                                                                                               |          |
|-------------------------------------------------------------------------------------------------------------------------------|----------|
| General Information .....                                                                                                     | S3       |
| Optimization Study .....                                                                                                      | S4-S9    |
| General Procedure for Preparation of $\alpha$ -Iminonitriles <b>1</b> .....                                                   | S10      |
| General procedure for the Asymmetric Synthesis of <b>4</b> .....                                                              | S11-S24  |
| General procedure for the Asymmetric Synthesis of <b>6</b> .....                                                              | S25-S35  |
| General procedure for the Asymmetric Friedel-Crafts reaction using other nucleophiles .....                                   | S36-S37  |
| Procedure for the Preparation of ( <i>R</i> )-2-(1H-Indol-3-yl)-2-phenyl-2-(tert-butoxycarbonylamino)acetamide ( <b>7</b> ) . | S38      |
| Asymmetric Friedel-Crafts Reaction of <b>1a</b> with <b>2a</b> with low catalyst loading .....                                | S39      |
| DFT Calculation.....                                                                                                          | S40-S67  |
| References .....                                                                                                              | S68      |
| Spectral Data for Isolated Products .....                                                                                     | S69-S110 |

**General Information:**

All reactions were performed in oven-dried glassware under a positive pressure of nitrogen. Solvents were transferred via syringe and were introduced into the reaction vessels through a rubber septum. All reactions were monitored by thin-layer chromatography (TLC) carried out on 0.25 mm Merck silica-gel (60-F254). The TLC plates were visualized with UV light. Column chromatography was carried out on a column packed with silica-gel 60N spherical neutral size 63-210  $\mu\text{m}$ . The  $^1\text{H}$  NMR (300 MHz) and  $^{19}\text{F}$  NMR (282 MHz) spectra for solution in  $\text{CDCl}_3$  were recorded on Varian Mercury 300, and  $^{13}\text{C}$  NMR (125 MHz) spectra for solution in  $\text{CDCl}_3$  were recorded on Bruker Avance 500. Chemical shifts ( $\delta$ ) are expressed in ppm downfield from internal TMS. HPLC analyses were performed on a SHIMADZU LC-2010A HT using 4.6 x 250 mm CHIRALPAK<sup>®</sup> IH-3, IBN-3, IC-3, IM, IF, and IK column. HRMS were recorded on a Waters SYNAPT G2 (ESI). ESI Mass spectra were recorded on a SHIMADZU LCMS-2020 using positive mode. Optical rotations were measured on a JASCO P-2200. Infrared spectra were recorded on a JASCO FT/IR-4600 spectrometer with ZnSe ATR unit. X-ray crystallographic analyses were conducted on X-ray generator or a Rigaku XtaLAB PRO MM007 DW diffractometer system equipped with a MicroMax007HFM-DW(Cu/Mo) X-ray generator and a HyPix-6000HE detector.

## Optimization Study using pyrrole

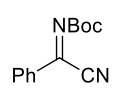

**1a**

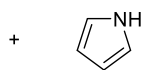

**2a** (1.2 equiv.)

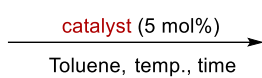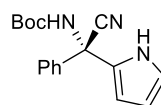

**4aa**

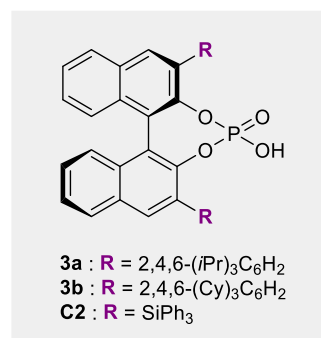

| catalyst  | solvent                         | temp. (°C) | time (h) | yield (%) | ee (%) |
|-----------|---------------------------------|------------|----------|-----------|--------|
| <b>3a</b> | Toluene                         | rt         | 3        | 99        | 97     |
| <b>3b</b> | Toluene                         | rt         | 0.5      | 89        | 77     |
| <b>C2</b> | Toluene                         | rt         | 96       | 92        | 40     |
| <b>3a</b> | CH <sub>2</sub> Cl <sub>2</sub> | 0          | 12       | 87        | 98     |
| <b>3a</b> | THF                             | 0          | 12       | n.r.      | -      |
| <b>3a</b> | AcOEt                           | 0          | 12       | 95        | 97     |
| <b>3a</b> | Toluene                         | 0          | 12       | 97        | 98     |
| <b>3a</b> | Toluene                         | -20        | 12       | 90        | 98     |
| <b>3a</b> | Toluene                         | -40        | 12       | trace     | -      |

## Optimization Study using indole

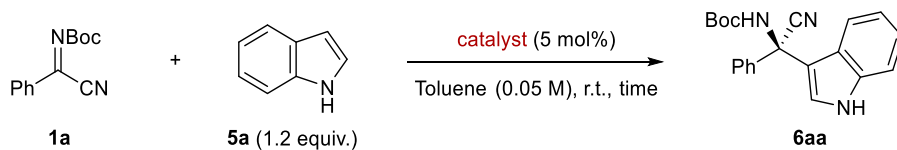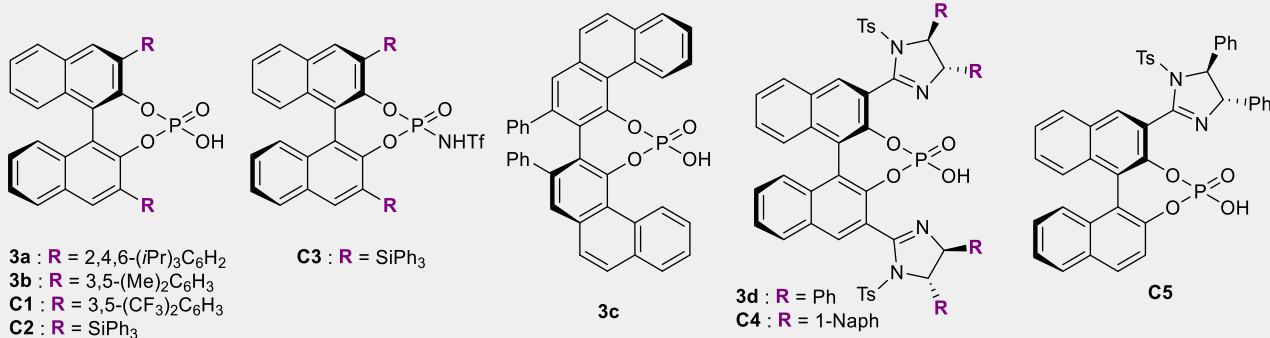

|  | catalyst  | time (h) | yield (%) | ee (%) |
|--|-----------|----------|-----------|--------|
|  | -         | 24       | n.r.      | -      |
|  | <b>3a</b> | 1        | 91        | 67     |
|  | <b>3b</b> | 1.5      | 94        | 25     |
|  | <b>C1</b> | 1.5      | 84        | 64     |
|  | <b>C2</b> | 96       | 92        | 40     |
|  | <b>C3</b> | 16       | 90        | 66     |
|  | <b>3c</b> | 1.5      | 84        | -64    |
|  | <b>3d</b> | 24       | 19        | 9      |
|  | <b>C4</b> | 24       | 93        | 9      |
|  | <b>C5</b> | 24       | n.r.      | -      |

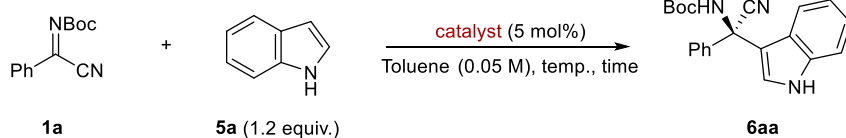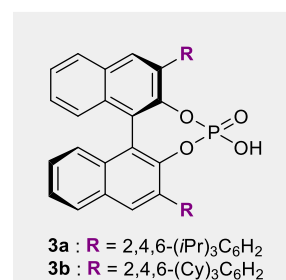

|  | catalyst  | temp. | time (h) | yield (%) | ee (%) |
|--|-----------|-------|----------|-----------|--------|
|  | <b>3a</b> | r.t.  | 1        | 91        | 67     |
|  | <b>3a</b> | 0     | 12       | 99        | 72     |
|  | <b>3b</b> | 0     | 16       | 95        | 82     |
|  | <b>3b</b> | -20   | 16       | 85        | 81     |

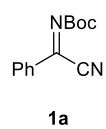

+

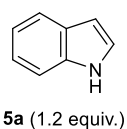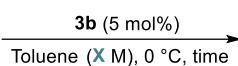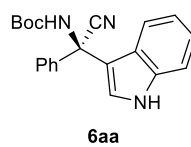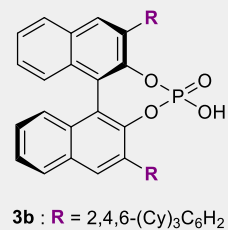

| concentration (M) | time (h) | yield (%) | ee (%) |
|-------------------|----------|-----------|--------|
| 0.05              | 16       | 95        | 82     |
| 0.025             | 16       | 78        | 81     |
| 0.1               | 16       | 96        | 83     |
| 0.25              | 5        | 89        | 82     |

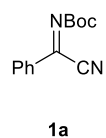

+

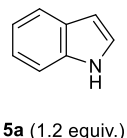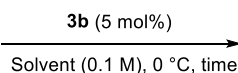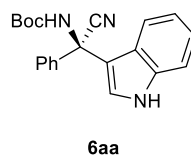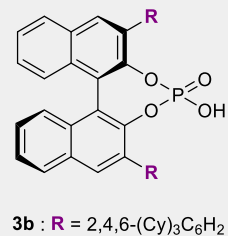

| solvent                             | time (h)  | yield (%) | ee (%)    |
|-------------------------------------|-----------|-----------|-----------|
| Toluene                             | 16        | 96        | 83        |
| CH <sub>2</sub> Cl <sub>2</sub>     | 5         | 92        | 93        |
| (CH <sub>2</sub> Cl) <sub>2</sub>   | 2         | 94        | 87        |
| CHCl <sub>3</sub>                   | 2         | 93        | 90        |
| CCl <sub>4</sub>                    | 2         | 97        | 89        |
| MeCN                                | 24        | 88        | 79        |
| THF                                 | 24        | n.r.      | -         |
| <b>CH<sub>2</sub>Cl<sub>2</sub></b> | <b>12</b> | <b>93</b> | <b>95</b> |

## The reactions of iminonitriles with sesamols

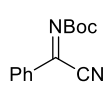

**1a**

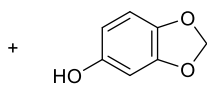

**5I** (1.2 equiv.)

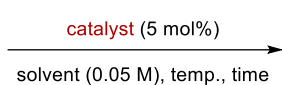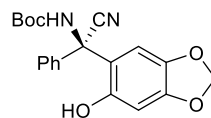

**6aI**

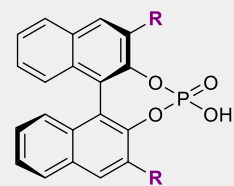

**3a** : R = 2,4,6-(iPr)<sub>3</sub>C<sub>6</sub>H<sub>2</sub>  
**3b** : R = 2,4,6-(Cy)<sub>3</sub>C<sub>6</sub>H<sub>2</sub>  
**C2** : R = SiPh<sub>3</sub>

| catalyst  | solvent                         | temp. | time (h) | yield (%) | ee (%) |
|-----------|---------------------------------|-------|----------|-----------|--------|
| <b>3a</b> | Toluene                         | r.t.  | 12       | 84        | 29     |
| <b>3a</b> | Toluene                         | -20   | 24       | 66        | 5      |
| <b>3a</b> | CH <sub>2</sub> Cl <sub>2</sub> | 0     | 6        | 92        | 29     |
| <b>3b</b> | CH <sub>2</sub> Cl <sub>2</sub> | -20   | 6        | 90        | 23     |
| <b>C2</b> | CH <sub>2</sub> Cl <sub>2</sub> | 0     | 18       | 59        | 4      |

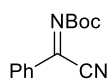

**1a**

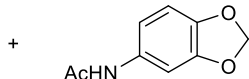

**5I'** (1.2 equiv.)

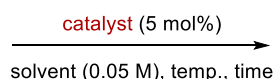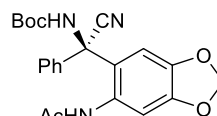

**6aI'**

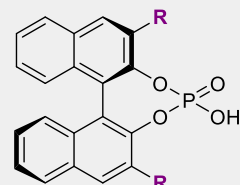

**3a** : R = 2,4,6-(iPr)<sub>3</sub>C<sub>6</sub>H<sub>2</sub>  
**3b** : R = 2,4,6-(Cy)<sub>3</sub>C<sub>6</sub>H<sub>2</sub>

| catalyst  | solvent                         | temp. | time (h) | yield (%) | ee (%) |
|-----------|---------------------------------|-------|----------|-----------|--------|
| <b>3a</b> | Toluene                         | 0     | 12       | 0         | -      |
| <b>3b</b> | CH <sub>2</sub> Cl <sub>2</sub> | -20   | 16       | 0         | -      |

## The reactions of iminonitriles with 1-naphthol

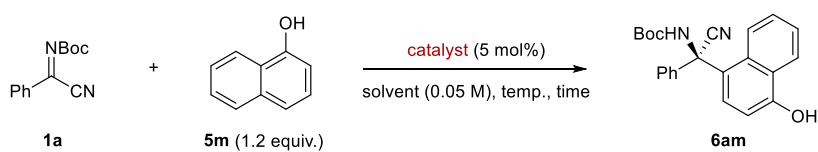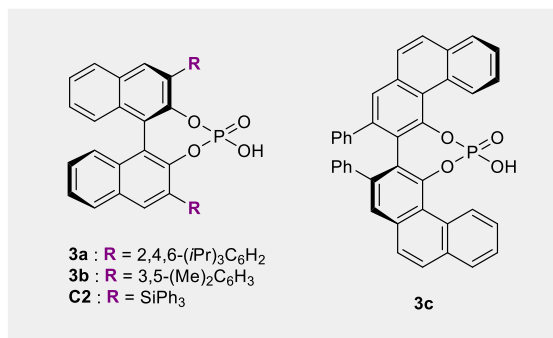

| catalyst  | solvent                         | temp. | time (h) | yield (%) | ee (%) |
|-----------|---------------------------------|-------|----------|-----------|--------|
| <b>3a</b> | Toluene                         | 0     | 168      | 77        | 23     |
| <b>3b</b> | CH <sub>2</sub> Cl <sub>2</sub> | -20   | 168      | 84        | 50     |
| <b>3b</b> | CH <sub>2</sub> Cl <sub>2</sub> | r.t.  | 48       | 64        | 37     |
| <b>C2</b> | CH <sub>2</sub> Cl <sub>2</sub> | 0     | 72       | 67        | 23     |
| <b>3c</b> | CH <sub>2</sub> Cl <sub>2</sub> | 0     | 48       | 97        | -35    |

## Other nucleophiles

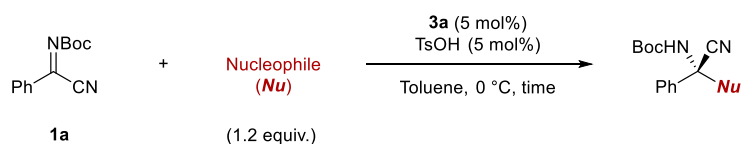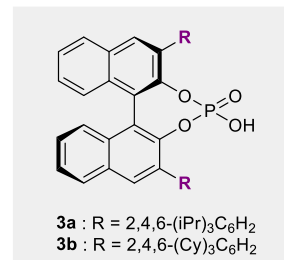

| Run | Nucleophile | Product | condition                                                       | yield | ee (%) |
|-----|-------------|---------|-----------------------------------------------------------------|-------|--------|
| 1   |             |         | catalyst <b>3b</b><br>in CH <sub>2</sub> Cl <sub>2</sub> , 12 h | 22    | 2      |
| 2   |             |         | catalyst <b>3a</b><br>in Toluene, 0 °C→r.t.,<br>12 h            | n.r.  | -      |
| 3   |             |         | catalyst <b>3a</b><br>in Toluene, 0 °C→r.t.,<br>12 h            | n.r.  | -      |



## The reaction using *N*-protected pyrrole.

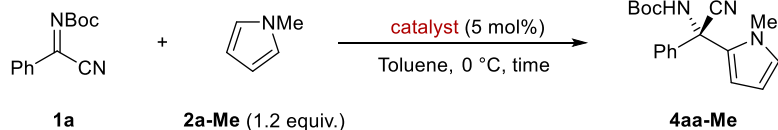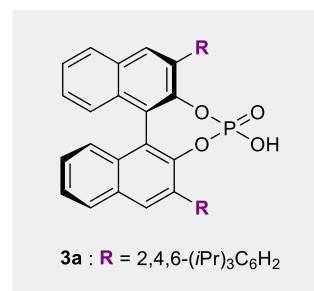

| catalyst  | time (h) | yield (%) | ee (%) |
|-----------|----------|-----------|--------|
| <b>3a</b> | 12       | 0         | -      |
| TsOH      | 6        | 32        | rac.   |

Since TsOH catalyzed the reaction, we hypothesized that strong acids can promote the reaction even without basic site through different reaction mechanism. We also investigated the reaction of pyrrole in the mixture of **3a**:TsOH = 1:1. The reaction maintained its enantioselectivity which implied that Bronsted acid-base dual activation is necessary to get enantioriched pyrrole adducts. However, in the case of employing stronger acid, the reaction probably proceeds via different mechanism.

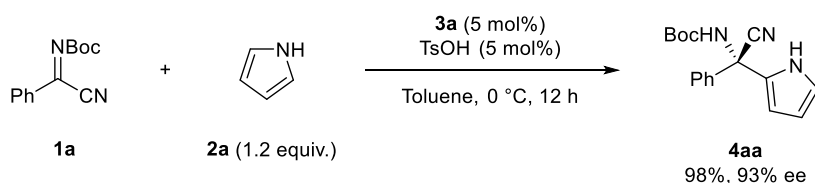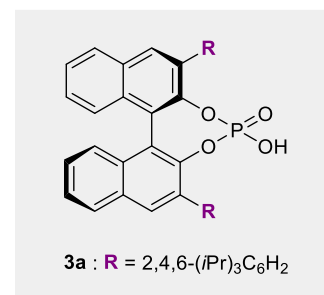

### General Procedure for Preparation of $\alpha$ -Iminonitriles (**1a-p**)

Unknown  $\alpha$ -imino nitriles (**1j**) were prepared according to the reported method.<sup>1</sup>

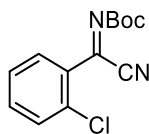

68% yield from corresponding benzoyl cyanide. Colorless oil. **m.p.**: 128.0-128.8 °C. **<sup>1</sup>H NMR** (CDCl<sub>3</sub>, 300 MHz)  $\delta$  7.81 (br, 1H), 7.55-7.50 (m, 2H), 7.43-7.37 (m, 1H), 1.63 (s, 9H); **<sup>13</sup>C NMR** (CDCl<sub>3</sub>, 125 MHz)  $\delta$  158.5, 141.3, 134.0, 132.6, 131.7, 131.4, 130.4, 127.4, 110.0, 85.6, 28.0; **IR** (ATR) 3460, 2981, 2223, 1736, 1589, 1371, 1146, 956, 727 cm<sup>-1</sup>; **HRMS** (ESI) *m/z*: [M+Na]<sup>+</sup> calculated for C<sub>13</sub>H<sub>13</sub>N<sub>2</sub>ClNaO<sub>2</sub> 287.0558; found 287.0559.

### General Procedure for Preparation of Various Imines **8**

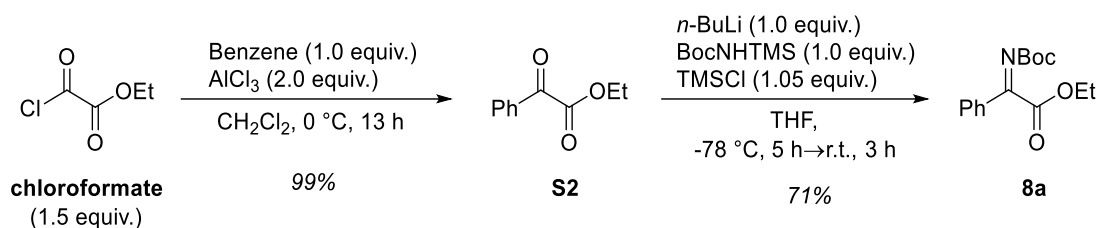

Imine **8a** was prepared according to the following procedure, and the analytical data for the compound was consistent with those reported in the literature.<sup>2</sup>

In a flame-dried round-bottomed flask, CH<sub>2</sub>Cl<sub>2</sub> (20 mL) was added. Then benzene (0.89 mL, 10 mmol) was added, and the mixture was cooled to 0 °C. To this reaction mixture, chloroformate (1.5 equiv.) was added. After the solution was stirred for 10 minutes, AlCl<sub>3</sub> (2.0 equiv.) was added portion-wise. The reaction mixture was further stirred at 0 °C for 13 h. After the reaction was complete, cold water and 12 M HCl were added until the organic layer became colorless and clear. The mixture was subsequently extracted with CH<sub>2</sub>Cl<sub>2</sub> 3 times, the combined organic layer was washed with sat. NaHCO<sub>3</sub> aq., brine, finally dried over Na<sub>2</sub>SO<sub>4</sub>. After the solvent was removed under reduced pressure, ethyl benzoylformate **S2** was purified by silica-gel column chromatography (eluent: Hexane/AcOEt, 95:5). To the solution of freshly prepared BocNHTMS (1.0 equiv.) in THF (0.1 M), *n*-BuLi (1.0 equiv.) was added dropwise at -78 °C under Ar. To the reaction mixture, the solution of **S2** in THF (1.0 M) was added dropwise. After the reaction mixture was stirred for 5 h, TMSCl (1.05 equiv.) was added. Then the reaction was allowed to warm up to room temperature and was further stirred for 3 h. The reaction was quenched by adding sat. NaHCO<sub>3</sub> aq. and extracted with AcOEt which was dried over Na<sub>2</sub>SO<sub>4</sub>. After the reaction mixture was concentrated under reduced pressure, the obtained crude product was purified by silica-gel column chromatography (eluent: Hexane/AcOEt, 95:5) to afford ketiminoester.

## General procedure for the synthesis of racemic products **4**

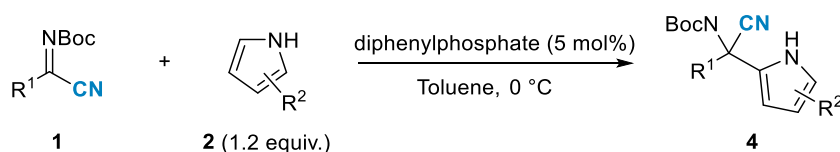

To the solution of iminonitrile **1** (1.0 equiv.) and diphenyl phosphate (5 mol%) in dry toluene (0.05 M), pyrrole **2** (1.2 equiv.) was added, then the mixture was stirred at 0 °C under argon atmosphere. The reaction mixture was concentrated under reduced pressure to give the residue, which was purified by silica-gel column chromatography to afford racemic products.

## General procedure for the asymmetric synthesis of **4**

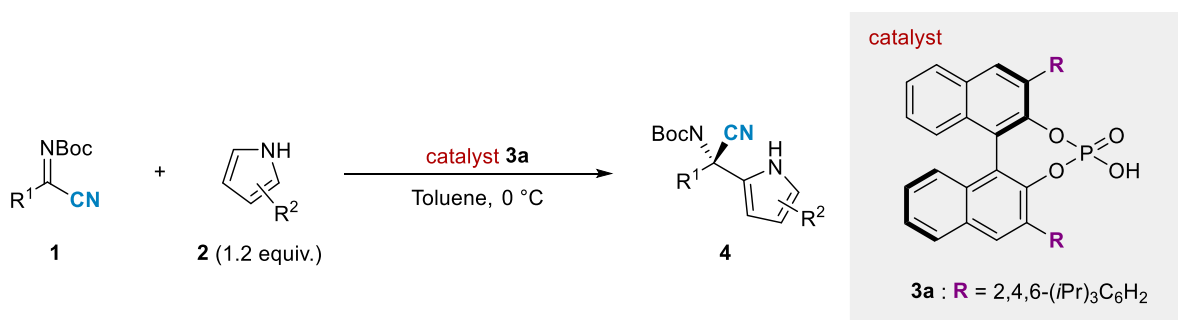

To a flame-dried flask, catalyst **3a** (5 mol%) and  $\alpha$ -iminonitrile **1** (1.0 equiv., 0.05 mmol) were dissolved in dry toluene (0.05 M) and cooled to 0 °C. Pyrrole **2** (1.2 equiv.) was added in one portion, and the solution was stirred at that temperature for 12 hours. The reaction mixture was concentrated under reduced pressure. Product **4** was purified by silica-gel column chromatography.

## (*S*)-2-Phenyl-2-(1*H*-pyrrol-2-yl)-2-(*tert*-butoxycarbonylamino)acetonitrile (**4aa**)

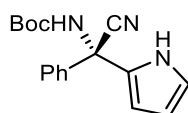

**4aa** (14.4 mg, 97% yield, 98% ee) was obtained by the general procedure using iminonitrile **1a** (11.5 mg, 0.05 mmol), pyrrole **2a** (4.2  $\mu$ L, 0.06 mmol) and catalyst **3a** (1.9 mg, 2.5  $\mu$ mol). The crude **4aa** was purified by silica-gel column chromatography (eluent: Hexane/AcOEt, 75:25).

Colorless oil. **Optical Rotation**:  $[\alpha]_D^{25.0} = -30.2$  (98% ee, *c* 1.0, CHCl<sub>3</sub>); **<sup>1</sup>H NMR** (CDCl<sub>3</sub>, 300 MHz)  $\delta$  8.81 (br, 1H), 7.62-7.57 (m, 2H), 7.48-7.38 (m, 3H), 6.79-6.77 (m, 1H), 6.13-6.10 (m, 1H), 5.95 (s, 1H), 5.44 (s, 1H), 1.39 (s, 9H); **<sup>13</sup>C NMR** (CDCl<sub>3</sub>, 125 MHz)  $\delta$  153.8, 137.1, 129.3, 129.1, 128.2, 125.9, 119.9, 118.3, 109.4, 108.9, 82.2, 57.1, 28.1; **IR** (ATR) 3410, 3347, 2980, 2366, 1693, 1488, 1152, 889, 732 cm<sup>-1</sup>; **HRMS** (ESI) *m/z*: [M+Na]<sup>+</sup> calculated for C<sub>17</sub>H<sub>19</sub>N<sub>3</sub>NaO<sub>2</sub> 320.1369; found 320.1379; **HPLC** (CHIRALPAK IBN-3, Hexane/*i*PrOH = 95:5, 1.0 mL/min, 215 nm) 98% ee, *t<sub>R</sub>* 8.0 (major), *t<sub>R</sub>* 10.1 (minor) min.

**(S)-2-Phenyl-2-(1-methylpyrrol-2-yl)-2-(tert-butoxycarbonylamino)acetonitrile (4aa-Me)**

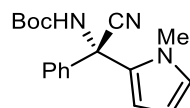

**4aa-Me** (5.0 mg, 32% yield) was obtained by the general procedure using iminonitrile **1a** (11.5 mg, 0.05 mmol), pyrrole **2a-Me** (5.3  $\mu$ L, 0.06 mmol) and TsOH (0.4 mg, 2.5  $\mu$ mol). The crude **4aa-Me** was purified by silica-gel column chromatography (eluent: Hexane/AcOEt, 80:20).

Pale yellow solid. **m.p.**: 132.1-132.8  $^{\circ}$ C.  **$^1$ H NMR** ( $\text{CDCl}_3$ , 300 MHz)  $\delta$  7.53-7.40 (m, 5H), 6.67 (t,  $J = 2.3$  Hz, 1H), 5.97 (t,  $J = 3.4$  Hz, 1H), 5.57 (s, 1H), 5.26 (s, 1H), 3.74 (s, 3H), 1.36 (s, 9H);  **$^{13}$ C NMR** ( $\text{CDCl}_3$ , 125 MHz)  $\delta$  153.1, 129.0, 128.8, 128.7, 127.3, 126.4, 126.4, 118.0, 112.1, 107.0, 82.1, 56.8, 35.7, 28.0; **IR** (ATR) 3233, 2982, 2851, 2338, 1777, 1586, 1410, 1136, 1051, 899, 730  $\text{cm}^{-1}$ ; **HRMS** (ESI)  $m/z$ :  $[\text{M}+\text{Na}]^+$  calculated for  $\text{C}_{18}\text{H}_{21}\text{N}_3\text{NaO}_2$  334.1526; found 334.1530

**(S)-2-(4-Fluorophenyl)-2-(1H-pyrrol-2-yl)-2-(tert-butoxycarbonylamino)acetonitrile (4ba)**

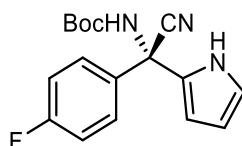

**4ba** (15.2 mg, 97% yield, 98% ee) was obtained by the general procedure using iminonitrile **1b** (12.4 mg, 0.05 mmol), pyrrole **2a** (4.2  $\mu$ L, 0.06 mmol) and catalyst **3a** (1.9 mg, 2.5  $\mu$ mol). The crude **4ba** was purified by silica-gel column chromatography (eluent: Hexane/AcOEt, 75:25).

Pale yellow oil. **Optical Rotation**:  $[\alpha]_{\text{D}}^{25.0} = -53.3$  (98% ee,  $c$  0.157,  $\text{CHCl}_3$ );  **$^1$ H NMR** ( $\text{CDCl}_3$ , 300 MHz)  $\delta$  8.81 (br, 1H), 7.60-7.51 (m, 2H), 7.17-7.10 (m, 2H), 6.81-6.78 (m, 1H), 6.13-6.10 (m, 1H), 5.92 (s, 1H), 5.48 (s, 1H), 1.39 (s, 9H);  **$^{13}$ C NMR** ( $\text{CDCl}_3$ , 125 MHz)  $\delta$  163.0 (d,  $J_{\text{C-F}} = 248.2$  Hz), 153.7, 127.9 (d,  $J_{\text{C-F}} = 8.5$  Hz), 120.2, 118.2, 116.2 (d,  $J_{\text{C-F}} = 20.8$  Hz), 115.9, 109.5, 108.9, 108.8, 82.4, 56.6, 28.1;  **$^{19}$ F NMR** ( $\text{CDCl}_3$ , 376 MHz)  $\delta$  -112.1; **IR** (ATR) 3336, 2923, 2320, 1716, 1507, 1372, 735  $\text{cm}^{-1}$ ; **HRMS** (ESI)  $m/z$ :  $[\text{M}+\text{Na}]^+$  calculated for  $\text{C}_{17}\text{H}_{18}\text{FN}_3\text{NaO}_2$  338.1275; found 338.1285; **HPLC** (CHIRALPAK IBN-3, Hexane/ $i$ PrOH = 97:3, 1.0 mL/min, 215 nm) 98% ee,  $t_R$  12.0 (major),  $t_R$  16.9 (minor) min.

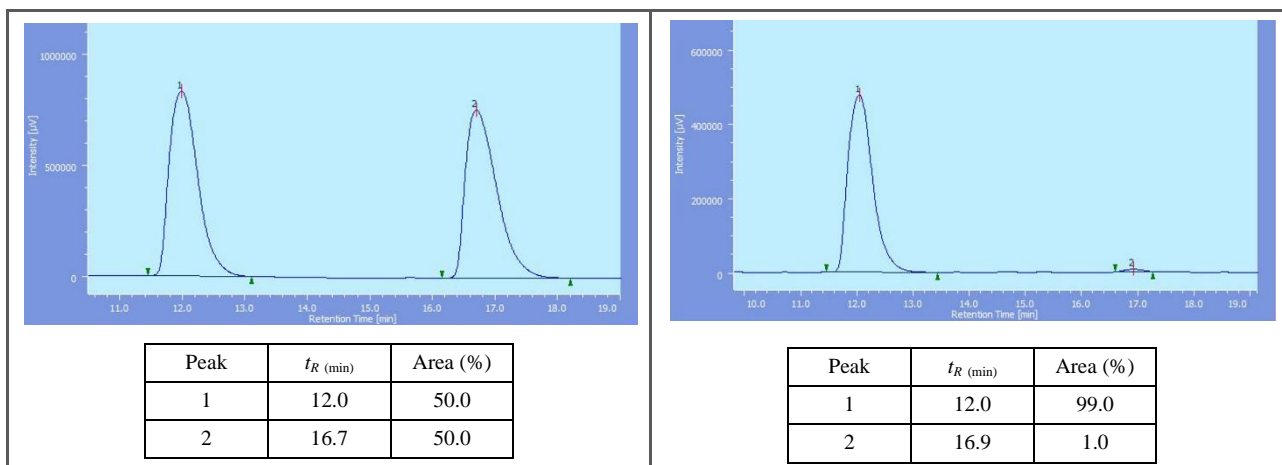

**(S)-2-(4-Chlorophenyl)-2-(1H-pyrrol-2-yl)-2-(tert-butoxycarbonylamino)acetonitrile (4ca)**

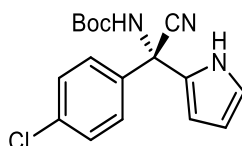

**4ca** (15.6 mg, 94% yield, 98% ee) was obtained by the general procedure using iminonitrile **1c** (13.2 mg, 0.05 mmol), pyrrole **2a** (4.2  $\mu$ L, 0.06 mmol) and catalyst **3a** (1.9 mg, 2.5  $\mu$ mol). The crude **4ca** was purified by silica-gel column chromatography (eluent: Hexane/AcOEt, 75:25).

Pale yellow oil. **Optical Rotation**:  $[\alpha]_D^{25.0} = -33.5$  (98% ee,  $c$  0.29,  $\text{CHCl}_3$ );  **$^1\text{H NMR}$**  ( $\text{CDCl}_3$ , 300 MHz)  $\delta$  8.78 (br, 1H), 7.52 (d,  $J = 8.7$  Hz, 2H), 7.41 (d,  $J = 8.7$  Hz, 2H), 6.80-6.78 (m, 1H), 6.13-6.6.01 (m, 1H), 5.94 (s, 1H), 5.53 (br, 1H), 1.39 (s, 9H);  **$^{13}\text{C NMR}$**  ( $\text{CDCl}_3$ , 125 MHz)  $\delta$  152.6, 134.8, 134.2, 128.2, 126.5, 126.3, 119.2, 117.1, 108.5, 108.0, 81.4, 55.7, 27.0; **IR** (ATR) 3345, 2979, 2318, 1699, 1490, 1159, 11240, 816  $\text{cm}^{-1}$ ; **HRMS** (ESI)  $m/z$ :  $[\text{M}+\text{Na}]^+$  calculated for  $\text{C}_{17}\text{H}_{18}\text{ClN}_3\text{NaO}_2$  354.0980; found 354.0987; **HPLC** (CHIRALPAK IBN-3, Hexane/ $i$ PrOH = 97:3, 1.0 mL/min, 214 nm) 98% ee,  $t_R$  12.4 (major),  $t_R$  16.4 (minor) min.

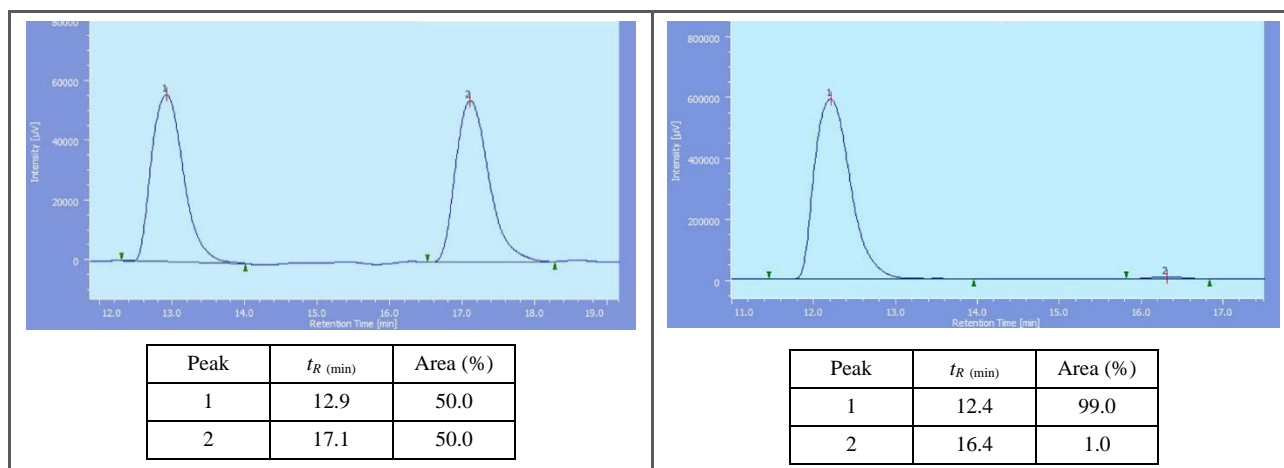

**(S)-2-(4-Bromophenyl)-2-(1H-pyrrol-2-yl)-2-(tert-butoxycarbonylamino)acetonitrile (4da)**

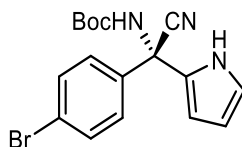

**4da** (17.8 mg, 95% yield, 98% ee) was obtained by the general procedure using iminonitrile **1d** (15.5 mg, 0.05 mmol), pyrrole **2a** (4.2  $\mu$ L, 0.06 mmol) and catalyst **3a** (1.9 mg, 2.5  $\mu$ mol). The crude **4da** was purified by silica-gel column chromatography (eluent: Hexane/AcOEt, 75:25).

White solid. **m.p.**: 104.5-105.0  $^{\circ}\text{C}$ . **Optical Rotation**:  $[\alpha]_D^{25.0} = -49.3$  (99% ee,  $c$  0.74,  $\text{CHCl}_3$ );  **$^1\text{H NMR}$**  ( $\text{CDCl}_3$ , 300 MHz)  $\delta$  8.80 (br, 1H), 7.57 (d,  $J = 8.6$  Hz, 1H), 7.46 (d,  $J = 8.6$  Hz, 1H), 6.80-6.78 (m, 1H), 6.12-6.09 (dd,  $J = 6.1, 3.0$  Hz, 1H), 5.94 (s, 1H), 5.55 (br, 1H), 1.39 (s, 9H);  **$^{13}\text{C NMR}$**  ( $\text{CDCl}_3$ , 125 MHz)  $\delta$  153.6, 132.2, 128.6, 127.6, 127.3, 123.4, 120.3, 118.1, 109.6, 109.0, 82.4, 56.8, 28.1; **IR** (ATR) 3333, 2977, 2247, 1702, 1486, 1367, 1158, 1010, 812, 731  $\text{cm}^{-1}$ ; **HRMS** (ESI)  $m/z$ :  $[\text{M}+\text{Na}]^+$  calculated for  $\text{C}_{17}\text{H}_{18}\text{BrN}_3\text{NaO}_2$  398.0475; found 398.0477; **HPLC** (CHIRALPAK IBN-3, Hexane/ $i$ PrOH = 97:3, 1.0 mL/min, 214 nm) 98% ee,  $t_R$  13.2 (major),  $t_R$  17.7 (minor) min.

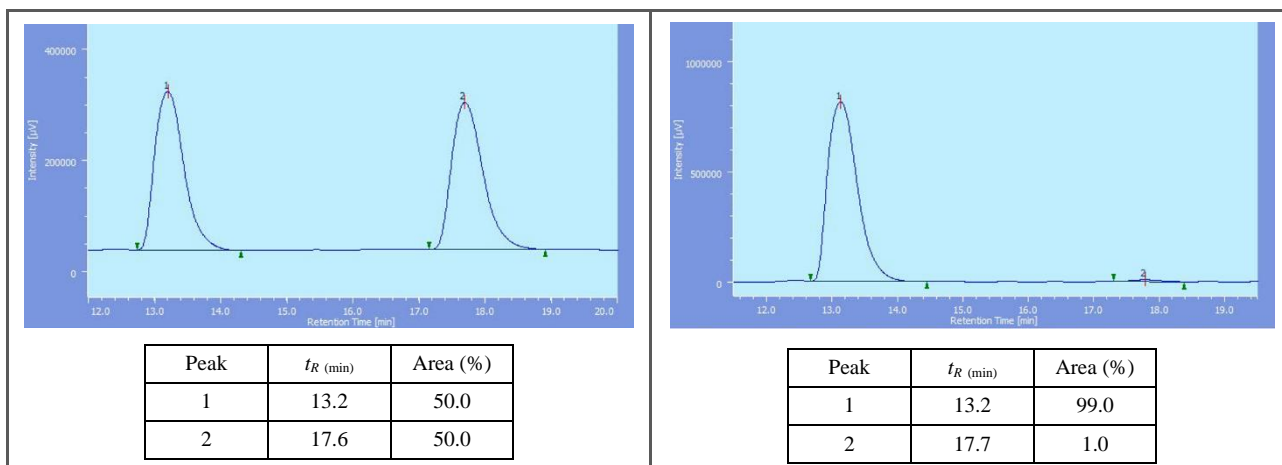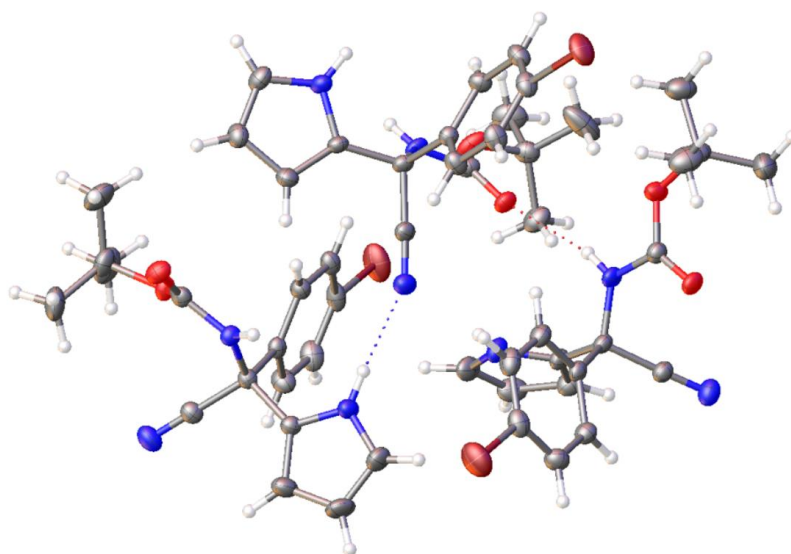

|                                               |                                                                |
|-----------------------------------------------|----------------------------------------------------------------|
| Empirical Formula                             | $C_{17}H_{18}BrN_3O_2$                                         |
| Formula weight                                | 376.25                                                         |
| Temperature/K                                 | 123.15                                                         |
| Crystal system                                | orthorhombic                                                   |
| Space group                                   | $P2_12_12$                                                     |
| $a/\text{\AA}$                                | 20.10730(10)                                                   |
| $b/\text{\AA}$                                | 17.86380(10)                                                   |
| $c/\text{\AA}$                                | 15.33700(3)                                                    |
| $\alpha/^\circ$                               | 90                                                             |
| $\beta/^\circ$                                | 90                                                             |
| $\gamma/^\circ$                               | 90                                                             |
| Volume/ $\text{\AA}^3$                        | 5508.94(5)                                                     |
| Z                                             | 12                                                             |
| $\rho_{\text{calc}}/\text{cm}^3$              | 1.361                                                          |
| $\mu/\text{mm}^{-1}$                          | 3.151                                                          |
| F(000)                                        | 2304.0                                                         |
| Crystal size/ $\text{mm}^3$                   | 0.21 x 0.18 x 0.14                                             |
| Radiation                                     | $\text{CuK}\alpha$ ( $\lambda = 1.54184$ )                     |
| $2\theta$ range for data collection/ $^\circ$ | 5.762 to 151.834                                               |
| Index ranges                                  | $-25 \leq h \leq 25, -17 \leq k \leq 21, -19 \leq l \leq 19$   |
| Reflections collected                         | 53680                                                          |
| Independent reflections                       | 11206 [ $R_{\text{int}} = 0.0255, R_{\text{sigma}} = 0.0175$ ] |
| Data/restraints/parameters                    | 11206/0/631                                                    |

Goodness-of-fit on F2 1.018  
 Final R indexes [ $I \geq 2\sigma$  (I)]  $R_1 = 0.0265$ ,  $wR_2 = 0.0667$   
 Final R indexes [all data]  $R_1 = 0.0268$ ,  $wR_2 = 0.0668$   
 Largest diff. peak/hole /  $e \text{ \AA}^{-3}$  0.49/-0.72  
 Flack parameter -0.014(3)

**(S)-2-(4-Iodophenyl)-2-(1H-pyrrol-2-yl)-2-(tert-butoxycarbonylamino)acetonitrile (4ea)**

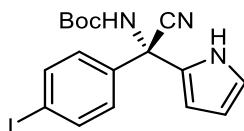

**4ea** (20.1 mg, 95% yield, 98% ee) was obtained by the general procedure using iminonitrile **1e** (17.8 mg, 0.05 mmol), pyrrole **2a** (4.2  $\mu\text{L}$ , 0.06 mmol) and catalyst **3a** (1.9 mg, 2.5  $\mu\text{mol}$ ). The crude **4ea** was purified by silica-gel column chromatography (eluent: Hexane/AcOEt, 75:25).

Pale yellow oil. **Optical Rotation**:  $[\alpha]_{\text{D}}^{25.0} = -30.9$  (98% ee,  $c$  0.21,  $\text{CHCl}_3$ );  **$^1\text{H NMR}$**  ( $\text{CDCl}_3$ , 300 MHz)  $\delta$  8.74 (br, 1H), 7.79 (d,  $J = 6.4$  Hz, 2H), 7.34 (d,  $J = 6.4$  Hz, 2H), 6.79 (dd,  $J = 3.2$ , 2.1 Hz, 1H), 6.12 (dd,  $J = 4.5$ , 2.2 Hz, 1H), 5.95 (br, 1H), 5.46 (s, 1H), 1.40 (s, 9H);  **$^{13}\text{C NMR}$**  ( $\text{CDCl}_3$ , 125 MHz)  $\delta$  153.5, 138.2, 131.0, 127.7, 127.4, 120.3, 118.0, 109.6, 109.1, 95.2, 82.4, 56.9, 28.1; **IR** (ATR) 3331, 2977, 2852, 2309, 1698, 1158, 1006, 728  $\text{cm}^{-1}$ ; **HRMS** (ESI)  $m/z$ :  $[\text{M}+\text{Na}]^+$  calculated for  $\text{C}_{17}\text{H}_{18}\text{IN}_3\text{NaO}_2$  446.0336; found 446.0341; **HPLC** (CHIRALPAK IBN-3, Hexane/ $i$ PrOH = 97:3, 1.0 mL/min, 214 nm) 98% ee,  $t_R$  14.5 (major),  $t_R$  19.2 (minor) min.

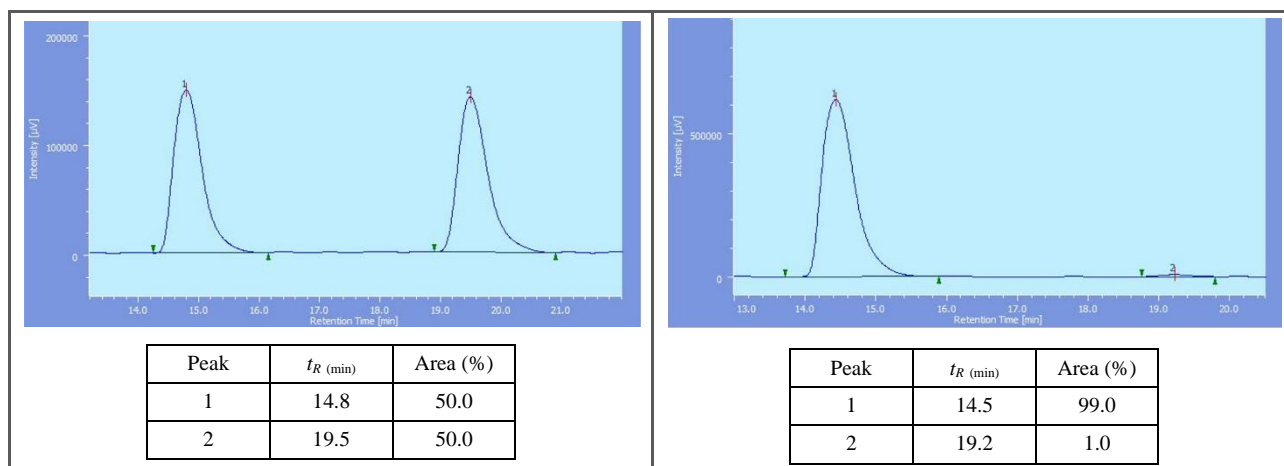

**(S)-2-(4-Methylphenyl)-2-(1H-pyrrol-2-yl)-2-(tert-butoxycarbonylamino)acetonitrile (4fa)**

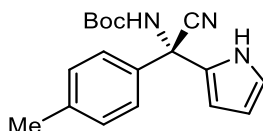

**4fa** (15.3 mg, 98% yield, 98% ee) was obtained by the general procedure using iminonitrile **1f** (12.2 mg, 0.05 mmol), pyrrole **2a** (4.2  $\mu\text{L}$ , 0.06 mmol) and catalyst **3a** (1.9 mg, 2.5  $\mu\text{mol}$ ). The crude **4fa** was purified by silica-gel column chromatography (eluent: Hexane/AcOEt, 75:25).

Yellow oil. **Optical Rotation**:  $[\alpha]_{\text{D}}^{25.0} = -13.3$  (98% ee,  $c$  0.21,  $\text{CHCl}_3$ );  **$^1\text{H NMR}$**  ( $\text{CDCl}_3$ , 300 MHz)  $\delta$  8.84 (br, 1H), 7.47 (d,  $J = 8.3$  Hz, 2H), 7.24 (d,  $J = 8.3$  Hz, 2H), 6.78-6.75 (m, 1H), 6.11 (dd,  $J = 6.1$ , 3.0 Hz, 1H), 5.95 (s, 1H), 5.41 (s, 1H), 2.38 (s, 3H), 1.40 (s, 9H);  **$^{13}\text{C NMR}$**  ( $\text{CDCl}_3$ , 125 MHz)  $\delta$  153.9, 139.3, 134.0, 129.7, 128.4, 125.9, 119.8, 118.4, 109.3, 108.8, 82.0, 56.9, 28.1, 21.1; **IR** (ATR) 3344, 2978, 2243, 1702, 1480, 1240, 1003, 808  $\text{cm}^{-1}$ ; **HRMS** (ESI)  $m/z$ :  $[\text{M}+\text{Na}]^+$  calculated for  $\text{C}_{18}\text{H}_{21}\text{N}_3\text{NaO}_2$  334.1526; found 334.1528; **HPLC** (CHIRALPAK IBN-3, Hexane/ $i$ PrOH = 97:3, 1.0 mL/min, 215 nm) 98% ee,  $t_R$  11.0 (major),  $t_R$  13.7 (minor) min.

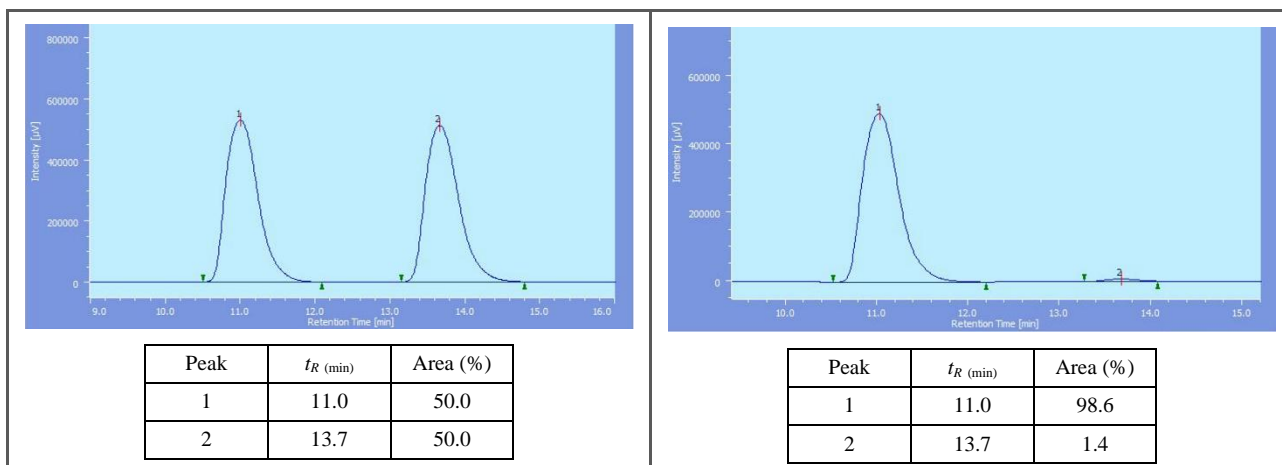

**(S)-2-(3-Bromophenyl)-2-(1H-pyrrol-2-yl)-2-(tert-butoxycarbonylamino)acetonitrile (4ga)**

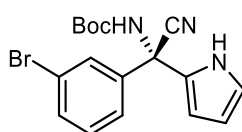

**4ga** (18.2 mg, 97% yield, 98% ee) was obtained by the general procedure using iminonitrile **1g** (15.5 mg, 0.05 mmol), pyrrole **2a** (4.2  $\mu$ L, 0.06 mmol) and catalyst **3a** (1.9 mg, 2.5  $\mu$ mol). The crude **4ga** was purified by silica-gel column chromatography (eluent: Hexane/AcOEt, 75:25).

White solid. **m.p.**: 102.0-103.0  $^{\circ}$ C. **Optical Rotation**:  $[\alpha]_D^{25.0} = -29.6$  (98% ee,  $c$  0.693,  $\text{CHCl}_3$ );  **$^1\text{H NMR}$**  ( $\text{CDCl}_3$ , 300 MHz)  $\delta$  8.71 (br, 1H), 8.74 (br, 1H), 7.74 (t,  $J = 2.0$  Hz, 1H), 7.57-7.52 (m, 2H), 6.81-6.79 (m, 1H), 6.13 (dd,  $J = 6.2, 3.0$  Hz, 1H), 5.98 (s, 1H), 5.45 (s, 1H), 1.40 (s, 9H);  **$^{13}\text{C NMR}$**  ( $\text{CDCl}_3$ , 125 MHz)  $\delta$  153.5, 132.4, 130.6, 128.9, 127.2, 124.6, 124.5, 123.1, 120.3, 109.6, 109.1, 82.4, 56.7, 28.1; **IR** (ATR) 3336, 2978, 2321, 1706, 1473, 1157, 781  $\text{cm}^{-1}$ ; **HRMS** (ESI)  $m/z$ :  $[\text{M}+\text{Na}]^+$  calculated for  $\text{C}_{17}\text{H}_{18}\text{BrN}_3\text{NaO}$  398.0475; found 398.1477; **HPLC** (CHIRALPAK IBN-3, Hexane/ $i$ PrOH = 97:3, 1.0 mL/min, 215 nm) 98% ee,  $t_R$  12.5 (major),  $t_R$  15.8 (minor) min.

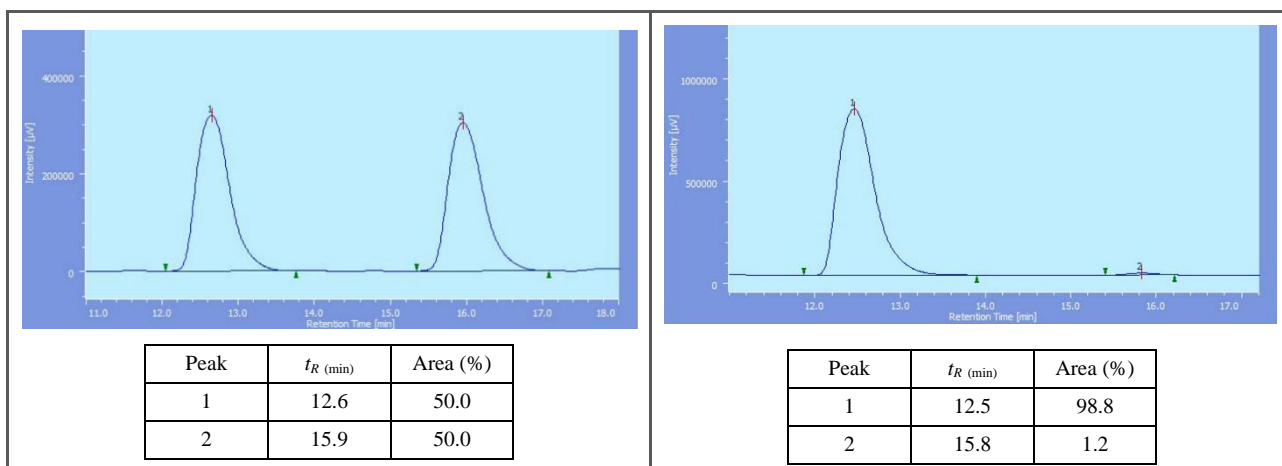



**(S)-2-(3-Methoxyphenyl)-2-(1H-pyrrol-2-yl)-2-(tert-butoxycarbonylamino)acetonitrile (4ha)**

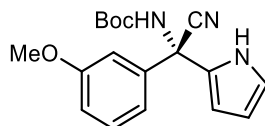

**4ha** (15.7 mg, 96% yield, 95% ee) was obtained by the general procedure using iminonitrile **1h** (13.0 mg, 0.05 mmol), pyrrole **2a** (4.2  $\mu$ L, 0.06 mmol) and catalyst **3a** (1.9 mg, 2.5  $\mu$ mol). The crude **4ha** was purified by silica-gel column chromatography (eluent: Hexane/AcOEt, 75:25).

Pale yellow oil. **Optical Rotation:**  $[\alpha]_D^{25.0} = -79.6$  (95% ee,  $c$  0.317,  $\text{CHCl}_3$ );  **$^1\text{H}$  NMR** ( $\text{CDCl}_3$ , 300 MHz)  $\delta$  8.77 (br, 1H), 7.36 (t,  $J = 8.1$  Hz, 1H), 7.18 (d,  $J = 7.7$  Hz, 1H), 7.13-7.11 (m, 1H), 6.95 (dd,  $J = 8.1, 2.5$  Hz, 1H), 6.76 (dd,  $J = 4.5, 2.4$  Hz, 1H), 6.12 (q,  $J = 3.0$  Hz, 1H), 6.01 (br, 1H), 5.43 (br, 1H), 3.82 (s, 3H), 1.40 (s, 9H);  **$^{13}\text{C}$  NMR** ( $\text{CDCl}_3$ , 125 MHz)  $\delta$  160.1, 153.8, 138.7, 130.2, 128.0, 119.9, 118.3, 118.1, 114.8, 111.7, 109.3, 108.9, 82.1, 57.1, 55.4, 28.1; **IR** (ATR) 3336, 2977, 2848, 2319, 1702, 1158, 739  $\text{cm}^{-1}$ ; **HRMS** (ESI)  $m/z$ :  $[\text{M}+\text{Na}]^+$  calculated for  $\text{C}_{18}\text{H}_{21}\text{N}_3\text{NaO}_2$  350.1475; found 350.1482; **HPLC** (CHIRALPAK IBN-3, Hexane/ $i$ PrOH = 97:3, 1.0 mL/min, 215 nm) 95% ee,  $t_R$  14.4 (major),  $t_R$  17.7 (minor) min.

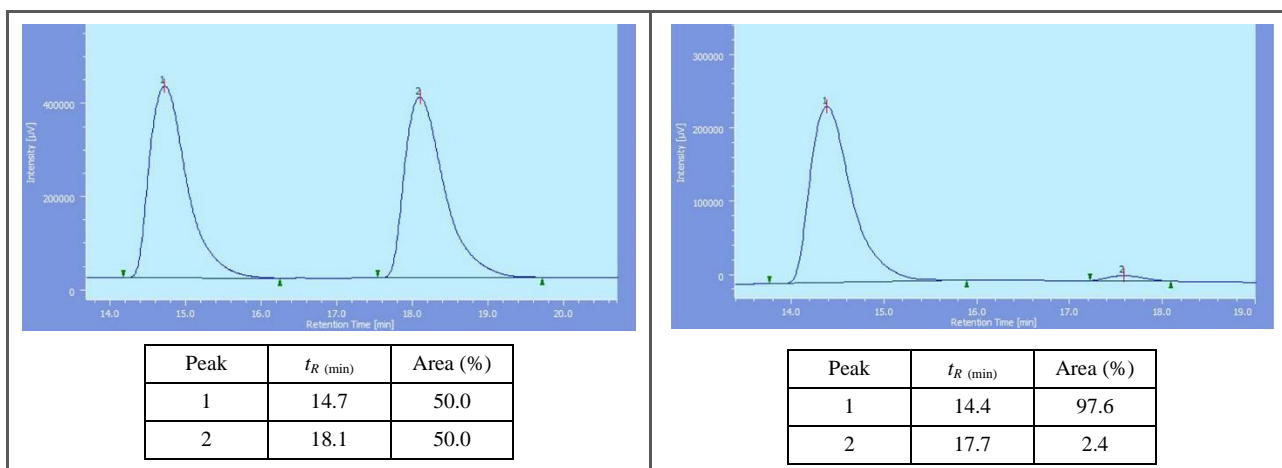

**(S)-2-(3-Methoxyphenyl)-2-(1H-pyrrol-2-yl)-2-(tert-butoxycarbonylamino)acetonitrile (4ia)**

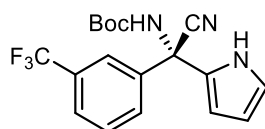

**4ia** (17.7 mg, 97% yield, 95% ee) was obtained by the general procedure using iminonitrile **1i** (14.9 mg, 0.05 mmol), pyrrole **2a** (4.2  $\mu$ L, 0.06 mmol) and catalyst **3a** (1.9 mg, 2.5  $\mu$ mol). The crude **4ia** was purified by silica-gel column chromatography (eluent: Hexane/AcOEt, 75:25).

Pale yellow oil. **Optical Rotation:**  $[\alpha]_D^{25.0} = -73.0$  (95% ee,  $c$  0.223,  $\text{CHCl}_3$ );  **$^1\text{H}$  NMR** ( $\text{CDCl}_3$ , 300 MHz)  $\delta$  8.71 (br, 1H), 7.84-7.79 (m, 2H), 7.69 (d,  $J = 7.8$  Hz, 1H), 7.58 (t,  $J = 7.8$  Hz, 1H), 6.82 (q,  $J = 2.3$  Hz, 1H), 6.13 (q,  $J = 3.0$  Hz, 1H), 5.92 (s, 1H), 5.52 (br, 1H), 4.15 (d,  $J = 12.6$  Hz, 1H), 1.38 (s, 9H);  **$^{13}\text{C}$  NMR** ( $\text{CDCl}_3$ , 125 MHz)  $\delta$  153.5, 131.5 (q,  $J_{\text{C-F}} = 32.5$  Hz), 129.7, 129.5, 127.0, 126.1, 123.6 (q,  $J_{\text{C-F}} = 262.4$  Hz), 122.6, 122.6, 120.6, 118.0, 109.8, 109.2, 82.6, 57.1, 28.0;  **$^{19}\text{F}$  NMR** ( $\text{CDCl}_3$ , 376 MHz)  $\delta$  -62.7; **IR** (ATR) 3336, 2924, 2319, 1704, 1328, 1162, 734  $\text{cm}^{-1}$ ; **HRMS** (ESI)  $m/z$ :  $[\text{M}+\text{Na}]^+$  calculated for  $\text{C}_{18}\text{H}_{18}\text{F}_3\text{N}_3\text{NaO}_2$  388.1243; found 388.1244; **HPLC** (CHIRALPAK IK, Hexane/ $i$ PrOH = 97:3, 1.0 mL/min, 215 nm) 95% ee,  $t_R$  7.3 (major),  $t_R$  8.2 (minor) min.

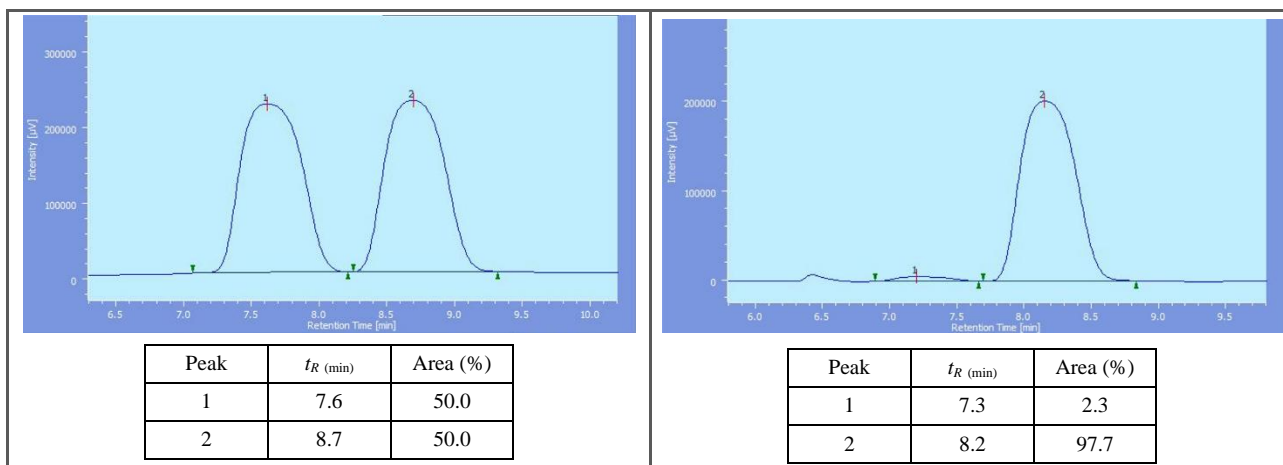

**(S)-2-(2-Chlorophenyl)-2-(1H-pyrrol-2-yl)-2-(tert-butoxycarbonylamino)acetonitrile (4ja)**

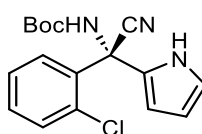

**4ja** (14.7 mg, 89% yield, 98% ee) was obtained by the general procedure using iminonitrile **1j** (13.2 mg, 0.05 mmol), pyrrole **2a** (4.2  $\mu$ L, 0.06 mmol) and catalyst **3a** (1.9 mg, 2.5  $\mu$ mol). The crude **4ja** was purified by silica-gel column chromatography (eluent: Hexane/AcOEt, 75:25).

Pale yellow oil. **Optical Rotation**:  $[\alpha]_D^{25.0} = -4.9$  (98% ee,  $c$  0.56,  $\text{CHCl}_3$ );  **$^1\text{H NMR}$**  ( $\text{CDCl}_3$ , 300 MHz)  $\delta$  8.62 (br, 1H), 7.61-7.57 (m, 1H), 7.46-7.34 (m, 3H), 6.82-6.80 (m, 1H), 6.19-6.10 (m, 2H), 5.66 (s, 1H), 1.39 (s, 9H);  **$^{13}\text{C NMR}$**  ( $\text{CDCl}_3$ , 125 MHz)  $\delta$  153.5, 133.6, 132.3, 132.0, 130.6, 129.7, 127.2, 126.0, 119.8, 117.2, 109.3, 109.3, 82.1, 57.0, 28.1; **IR** (ATR) 3334, 2979, 2324, 1702, 1558, 1367, 1157, 889, 743  $\text{cm}^{-1}$ ; **HRMS** (ESI)  $m/z$ :  $[\text{M}+\text{Na}]^+$  calculated for  $\text{C}_{17}\text{H}_{18}\text{ClN}_3\text{NaO}_2$  354.0980; found 354.0988; **HPLC** (CHIRALPAK IBN-3, Hexane/ $i$ PrOH = 97:3, 1.0 mL/min, 215 nm) 98% ee,  $t_R$  10.9 (major),  $t_R$  13.7 (minor) min.

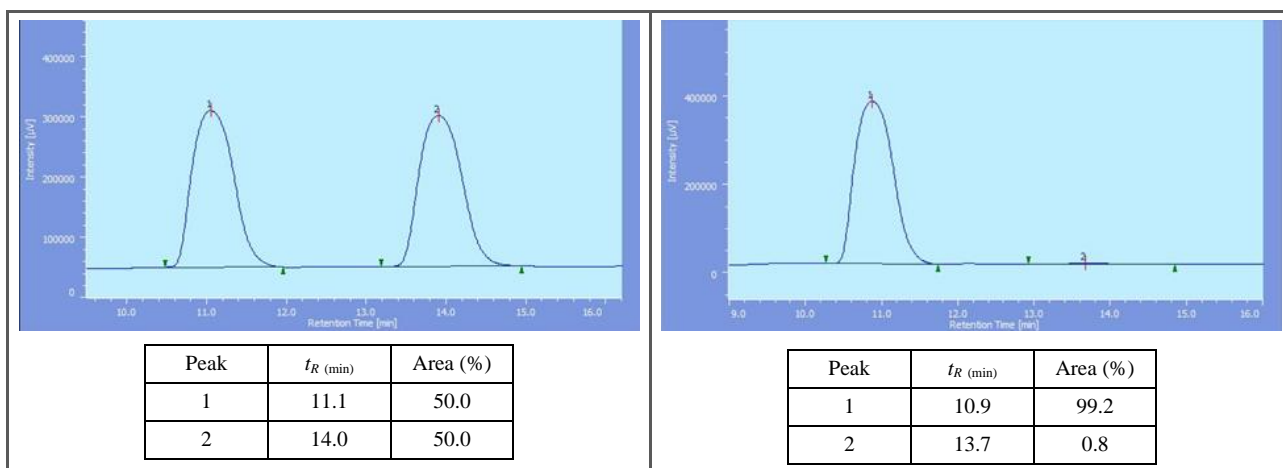

**(S)-2-(2-Methylphenyl)-2-(1H-pyrrol-2-yl)-2-(tert-butoxycarbonylamino)acetonitrile (4ka)**

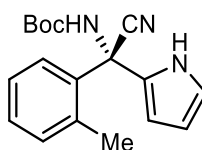

**4ka** (8.7 mg, 56% yield, 98% ee) was obtained by the general procedure using iminonitrile **1k** (12.2 mg, 0.05 mmol), pyrrole **2a** (4.2  $\mu$ L, 0.06 mmol) and catalyst **3a** (1.9 mg, 2.5  $\mu$ mol). The crude **4ka** was purified by silica-gel column

chromatography (eluent: Hexane/AcOEt, 75:25).

Colorless oil. **Optical Rotation:**  $[\alpha]_D^{25.0} = -71.2$  (98% ee,  $c$  0.177,  $\text{CHCl}_3$ );  **$^1\text{H NMR}$**  ( $\text{CDCl}_3$ , 300 MHz)  $\delta$  8.51 (br, 1H), 7.52 (dd,  $J = 7.6, 1.6$  Hz, 1H), 7.35-7.19 (m, 3H), 6.78-6.76 (m, 1H), 6.18-6.15 (m, 1H), 6.12 (s, 1H), 5.34 (br, 1H), 2.31 (s, 3H), 1.41 (s, 9H);  **$^{13}\text{C NMR}$**  ( $\text{CDCl}_3$ , 125 MHz)  $\delta$  153.7, 136.2, 134.2, 133.0, 131.0, 129.4, 127.3, 126.8, 126.4, 119.6, 118.0, 109.2, 82.1, 56.9, 28.1, 20.9; **IR** (ATR) 3336, 2978, 2852, 2320, 1698, 1367, 1159, 737  $\text{cm}^{-1}$ ; **HRMS** (ESI)  $m/z$ :  $[\text{M}+\text{Na}]^+$  calculated for  $\text{C}_{18}\text{H}_{21}\text{N}_3\text{NaO}_2$  334.1526; found 334.1532; **HPLC** (CHIRALPAK IBN-3, Hexane/ $i$ PrOH = 97:3, 1.0 mL/min, 215 nm) 98% ee,  $t_R$  8.8 (major),  $t_R$  11.4 (minor) min.

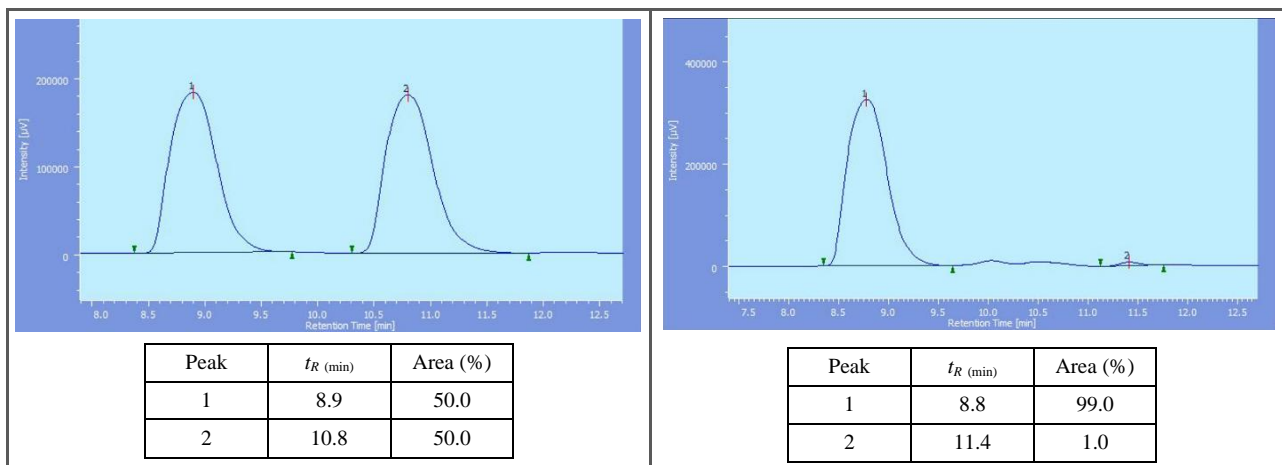

**(S)-2-(1-Naphthyl)-2-(1H-pyrrol-2-yl)-2-(tert-butoxycarbonylamino)acetonitrile (4la)**

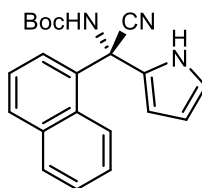

**4la** (16.0 mg, 92% yield, 95% ee) was obtained by the general procedure using iminonitrile **11** (14.0 mg, 0.05 mmol), pyrrole **2a** (4.2  $\mu\text{L}$ , 0.06 mmol) and catalyst **3a** (1.9 mg, 2.5  $\mu\text{mol}$ ). The crude **4la** was purified by silica-gel column chromatography (eluent: Hexane/AcOEt, 75:25).

Pale yellow oil. **Optical Rotation:**  $[\alpha]_D^{25.0} = +23.8$  (95% ee,  $c$  0.290,  $\text{CHCl}_3$ );  **$^1\text{H NMR}$**  ( $\text{CDCl}_3$ , 300 MHz)  $\delta$  9.22 (br, 1H), 8.13 (d,  $J = 8.2$  Hz, 1H), 7.96-7.90 (m, 3H), 7.78 (s, 1H), 7.54-7.45 (m, 4H), 6.81-6.79 (m, 1H), 6.12 (s, 1H), 5.98 (br, 1H), 5.56 (s, 1H), 4.29 (d,  $J = 12.6$  Hz, 1H), 4.15 (d,  $J = 12.6$  Hz, 1H), 1.41 (s, 9H);  **$^{13}\text{C NMR}$**  ( $\text{CDCl}_3$ , 125 MHz)  $\delta$  154.2, 134.8, 131.2, 129.3, 129.3, 127.5, 126.7, 126.7, 126.2, 125.5, 124.9, 119.6, 118.0, 111.9, 109.9, 108.9, 82.2, 57.4, 28.2; **IR** (ATR) 3290, 2928, 2319, 1702, 1157, 748  $\text{cm}^{-1}$ ; **HRMS** (ESI)  $m/z$ :  $[\text{M}+\text{Na}]^+$  calculated for  $\text{C}_{21}\text{H}_{21}\text{N}_3\text{NaO}_2$  370.1526; found 370.1527; **HPLC** (CHIRALPAK IBN-3, Hexane/ $i$ PrOH = 95:5, 1.0 mL/min, 215 nm) 95% ee,  $t_R$  8.9 (major),  $t_R$  16.6 (minor) min.

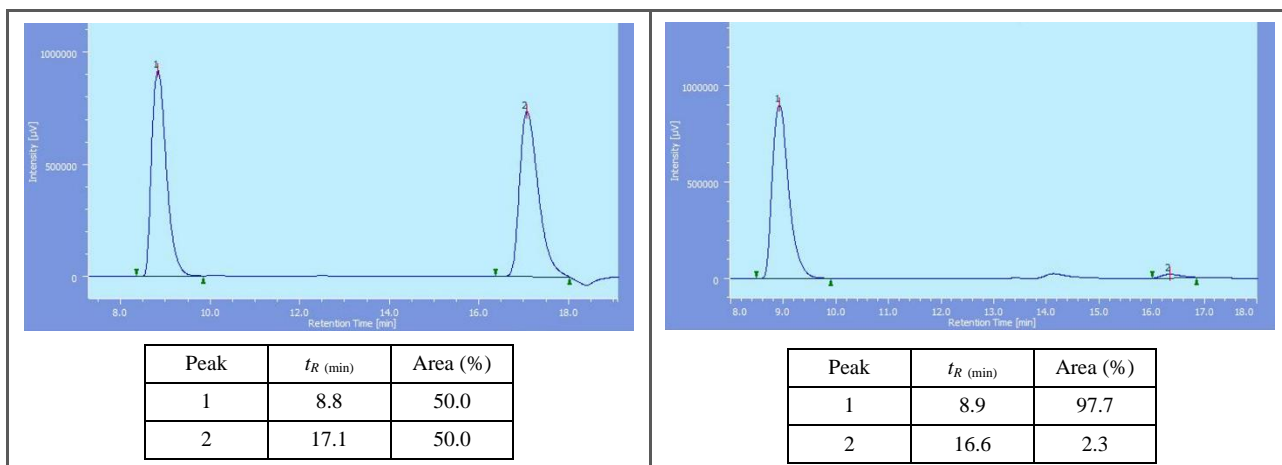

**(S)-2-(2-Naphthyl)-2-(1H-pyrrol-2-yl)-2-(tert-butoxycarbonylamino)acetonitrile (4ma)**

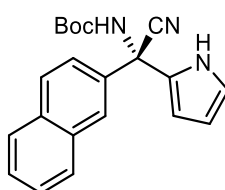

**4ma** (15.8 mg, 91% yield, 81% ee) was obtained by the general procedure using iminonitrile **1m** (14.0 mg, 0.05 mmol), pyrrole **2a** (4.2  $\mu$ L, 0.06 mmol) and catalyst **3a** (1.9 mg, 2.5  $\mu$ mol). The crude **4ma** was purified by silica-gel column chromatography (eluent: Hexane/AcOEt, 75:25).

Pale yellow oil. **Optical Rotation:**  $[\alpha]_D^{25.0} = -15.1$  (81% ee,  $c$  0.347,  $\text{CHCl}_3$ );  **$^1\text{H NMR}$**  ( $\text{CDCl}_3$ , 300 MHz)  $\delta$  8.82 (br, 1H), 8.12 (d,  $J = 2.0$  Hz, 1H), 7.94-7.87 (m, 3H), 7.64-7.52 (m, 3H), 6.77 (dd,  $J = 4.3, 2.8$  Hz, 1H), 6.12 (m, 1H), 6.00 (br, 1H), 5.61 (s, 1H), 1.38 (s, 9H);  **$^{13}\text{C NMR}$**  ( $\text{CDCl}_3$ , 125 MHz)  $\delta$  153.9, 133.3, 132.9, 129.2, 128.5, 128.0, 127.7, 127.2, 127.0, 125.6, 123.0, 120.0, 118.4, 109.4, 108.9, 82.2, 57.3, 28.1; **IR** (ATR) 3354, 2978, 2318, 1698, 1366, 1157, 752  $\text{cm}^{-1}$ ; **HRMS** (ESI)  $m/z$ :  $[\text{M}+\text{Na}]^+$  calculated for  $\text{C}_{21}\text{H}_{21}\text{N}_3\text{NaO}_2$  370.1526; found 370.1538; **HPLC** (CHIRALPAK IBN-3, Hexane/ $i$ PrOH = 97:3, 1.0 mL/min, 215 nm) 81% ee,  $t_R$  18.2 (major),  $t_R$  21.6 (minor) min.

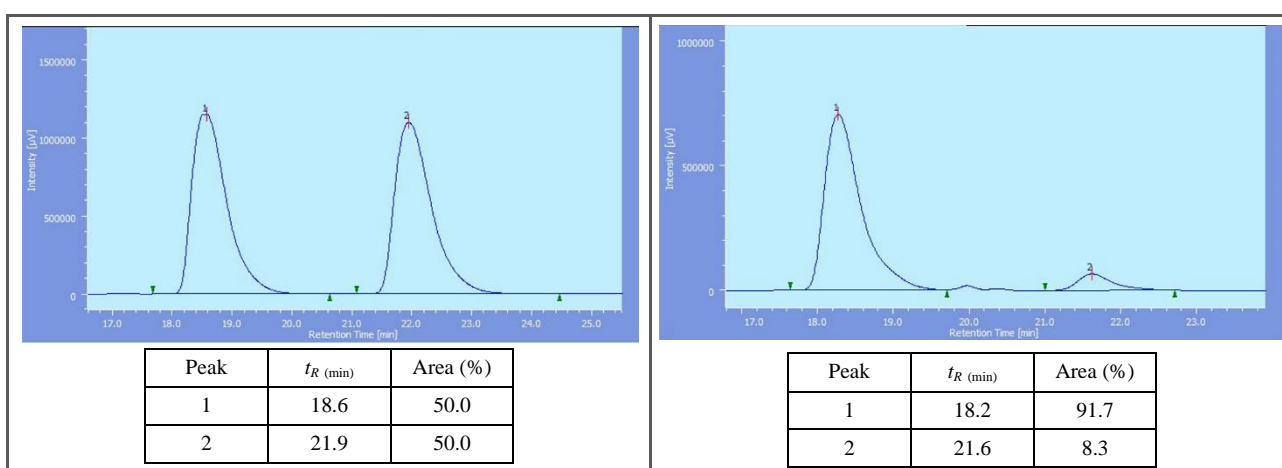

**(S)-2-(2-Furyl)-2-(1H-pyrrol-2-yl)-2-(tert-butoxycarbonylamino)acetonitrile (4na)**

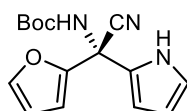

**4na** (13.5 mg, 94% yield, 52% ee) was obtained by the general procedure using iminonitrile **1n** (11.1 mg, 0.05 mmol), pyrrole **2a** (4.2  $\mu$ L, 0.06 mmol) and catalyst **3a** (1.9 mg, 2.5  $\mu$ mol). The crude **4na** was purified by silica-gel column chromatography (eluent: Hexane/AcOEt, 75:25).

Dark brown oil. **Optical Rotation**:  $[\alpha]_D^{25.0} = -6.4$  (52% ee,  $c$  0.270,  $\text{CHCl}_3$ );  **$^1\text{H}$  NMR** ( $\text{CDCl}_3$ , 300 MHz)  $\delta$  9.10 (br, 1H), 7.48-7.46 (m, 1H), 6.80 (dd,  $J = 4.7, 2.3$  Hz, 1H), 6.54 (dd,  $J = 3.4, 0.9$  Hz, 1H), 6.44 (dd,  $J = 3.4, 1.9$  Hz, 1H), 6.14 (dd,  $J = 6.0, 3.4$  Hz, 1H), 5.53 (s, 1H), 1.43 (s, 9H);  **$^{13}\text{C}$  NMR** ( $\text{CDCl}_3$ , 125 MHz)  $\delta$  153.8, 147.9, 143.6, 126.3, 119.9, 116.5, 111.1, 109.6, 108.7, 108.7, 82.3, 52.1, 28.1; **IR** (ATR) 3334, 2918, 2320, 1716, 1488, 1157, 880, 733  $\text{cm}^{-1}$ ; **HRMS** (ESI)  $m/z$ :  $[\text{M}+\text{Na}]^+$  calculated for  $\text{C}_{15}\text{H}_{17}\text{N}_3\text{NaO}_3$  310.1162; found 310.1165; **HPLC** (CHIRALPAK IBN-3, Hexane/ $i$ PrOH = 97:3, 1.0 mL/min, 215 nm) 52% ee,  $t_R$  15.0 (major),  $t_R$  21.8 (minor) min.

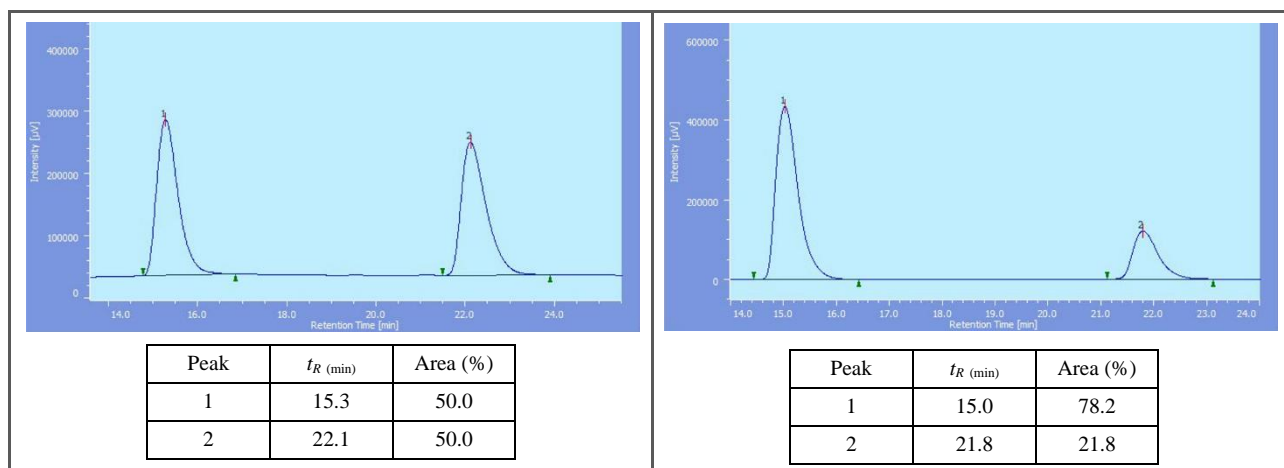

**(S)-2-(2-Thienyl)-2-(1H-pyrrol-2-yl)-2-(tert-butoxycarbonylamino)acetonitrile (4oa)**

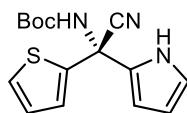

**4oa** (14.0 mg, 92% yield, 39% ee) was obtained by the general procedure using iminonitrile **1o** (11.8 mg, 0.05 mmol), pyrrole **2a** (4.2  $\mu$ L, 0.06 mmol) and catalyst **3a** (1.9 mg, 2.5  $\mu$ mol). The crude **4oa** was purified by silica-gel column chromatography (eluent: Hexane/AcOEt, 75:25).

Brown amorphous solid. **Optical Rotation**:  $[\alpha]_D^{25.0} = +2.0$  (39% ee,  $c$  0.28,  $\text{CHCl}_3$ );  **$^1\text{H}$  NMR** ( $\text{CDCl}_3$ , 300 MHz)  $\delta$  8.89 (br, 1H), 7.32 (dd,  $J = 5.1, 1.3$  Hz, 1H), 7.29 (dd,  $J = 3.7, 1.3$  Hz, 1H), 7.03-7.01 (m, 1H), 6.81-6.78 (m, 1H), 6.19 (s, 1H), 6.17-6.14 (m, 1H), 5.51 (br, 1H), 1.42 (s, 9H);  **$^{13}\text{C}$  NMR** ( $\text{CDCl}_3$ , 125 MHz)  $\delta$  153.6, 141.2, 127.9, 127.2, 126.9, 119.8, 117.7, 108.9, 82.4, 53.8, 28.1; **IR** (ATR) 3344, 2979, 2317, 1669, 1234, 1151, 1002, 665  $\text{cm}^{-1}$ ; **HRMS** (ESI)  $m/z$ :  $[\text{M}+\text{Na}]^+$  calculated for  $\text{C}_{15}\text{H}_{21}\text{N}_3\text{NaO}_2\text{S}$  326.0934; found 326.0937; **HPLC** (CHIRALPAK IBN-3, Hexane/ $i$ PrOH = 97:3, 1.0 mL/min, 215 nm) 39% ee,  $t_R$  12.8 (major),  $t_R$  18.0 (minor) min.

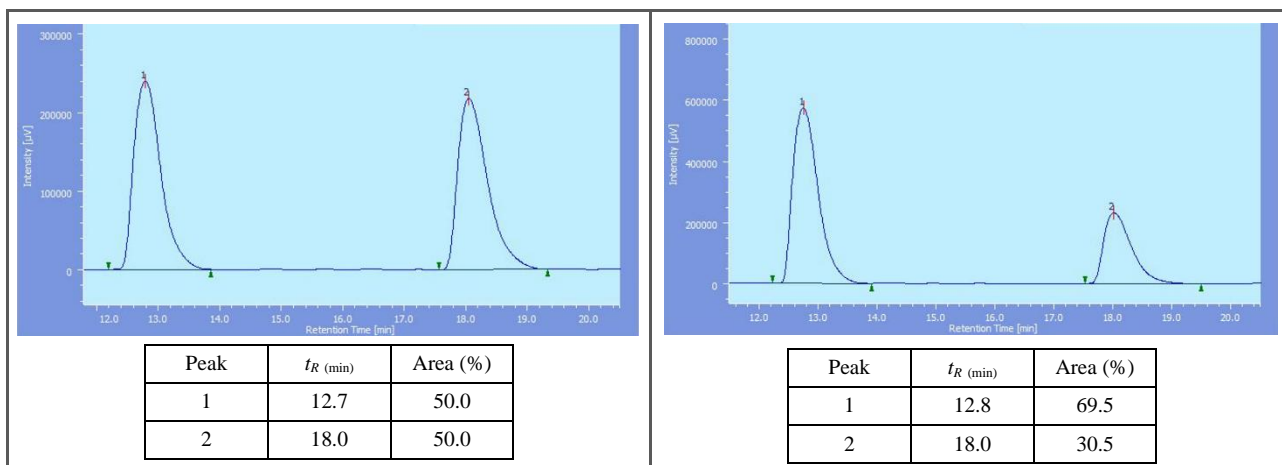

**(S)-2-Phenyl-2-(5-ethyl-1H-pyrrol-2-yl)-2-(tert-butoxycarbonylamino)acetonitrile (4ab)**

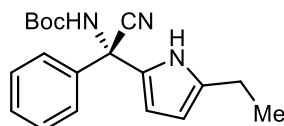

**4ab** (15.9 mg, 98% yield, 99% ee) was obtained by the general procedure using iminonitrile **1a** (11.5 mg, 0.05 mmol), pyrrole **2b** (10.0  $\mu$ L in 6M Toluene solution, 0.06 mmol) and catalyst **3a** (1.9 mg, 2.5  $\mu$ mol). The crude **4ab** was purified by silica-gel column chromatography (eluent: Hexane/AcOEt, 80:20).

Yellow oil. **Optical Rotation:**  $[\alpha]_D^{25.0} = +8.5$  (99% ee,  $c$  0.29,  $\text{CHCl}_3$ );  **$^1\text{H NMR}$**  ( $\text{CDCl}_3$ , 300 MHz)  $\delta$  8.57 (br, 1H), 7.62-7.59 (m, 2H), 7.48-7.38 (m, 3H), 5.78-5.73 (m, 2H), 5.45 (s, 1H), 2.57 (q,  $J = 7.6$  Hz, 1H), 1.38 (s, 9H), 1.22 (t,  $J = 7.6$  Hz, 1H);  **$^{13}\text{C NMR}$**  ( $\text{CDCl}_3$ , 125 MHz)  $\delta$  152.8, 135.8, 128.1, 127.9, 124.9, 117.5, 108.7, 103.8, 81.0, 56.2, 27.0, 19.8, 12.3; **IR** (ATR) 3330, 2974, 2239, 1702, 1450, 1366, 1159, 756, 697  $\text{cm}^{-1}$ ; **HRMS** (ESI)  $m/z$ :  $[\text{M}+\text{Na}]^+$  calculated for  $\text{C}_{19}\text{H}_{23}\text{N}_3\text{NaO}_2$  348.1682; found 348.1681; **HPLC** (CHIRALPAK IC-3, Hexane/ $i$ PrOH = 99:1, 1.0 mL/min, 215 nm) 99% ee,  $t_R$  22.8 (major),  $t_R$  26.9 (minor) min.

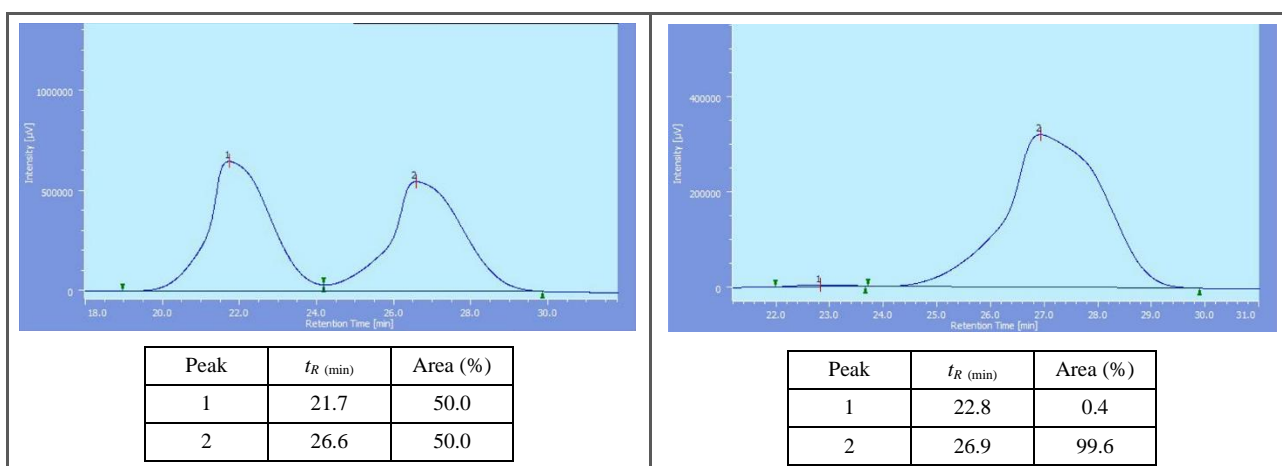

**(S)-2-Phenyl-2-(5-phenyl-1H-pyrrol-2-yl)-2-(tert-butoxycarbonylamino)acetonitrile (4ac)**

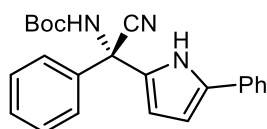

**4ac** (17.7 mg, 95% yield, 99.6% ee) was obtained by the general procedure using iminonitrile **1a** (11.5 mg, 0.05

mmol), pyrrole **2c** (8.6 mg, 0.06 mmol) and catalyst **3a** (1.9 mg, 2.5  $\mu\text{mol}$ ). The crude **4ac** was purified by silica-gel column chromatography (eluent: Hexane/AcOEt, 80:20).

Pale yellow oil. **Optical Rotation:**  $[\alpha]_{\text{D}}^{25.0} = -48.2$  (99% ee,  $c$  0.64,  $\text{CHCl}_3$ );  **$^1\text{H NMR}$**  ( $\text{CDCl}_3$ , 300 MHz)  $\delta$  9.25 (br, 1H), 7.80 (m,  $J = 8.2$  Hz, 2H), 7.46-7.34 (m, 7H), 7.27-7.22 (m, 1H), 6.35 (t,  $J = 3.2$  Hz, 2H), 5.89 (s, 1H), 5.57 (s, 1H), 1.41 (s, 9H);  **$^{13}\text{C NMR}$**  ( $\text{CDCl}_3$ , 125 MHz)  $\delta$  154.0, 138.2, 136.9, 134.7, 131.7, 129.0, 128.2, 127.9, 127.2, 124.2, 117.9, 111.5, 106.0, 95.4, 82.6, 57.0, 28.1; **IR** (ATR) 3341, 2978, 2309, 1708, 1482, 1368, 1160, 967, 757  $\text{cm}^{-1}$ ; **HRMS** (ESI)  $m/z$ :  $[\text{M}+\text{Na}]^+$  calculated for  $\text{C}_{23}\text{H}_{23}\text{N}_3\text{NaO}_2$  396.1682; found 396.1688; **HPLC** (CHIRALPAK IBN-3, Hexane/ $i$ PrOH = 95:5, 1.0 mL/min, 215 nm) 99.6% ee,  $t_{\text{R}}$  22.9 (major),  $t_{\text{R}}$  26.8 (minor) min.

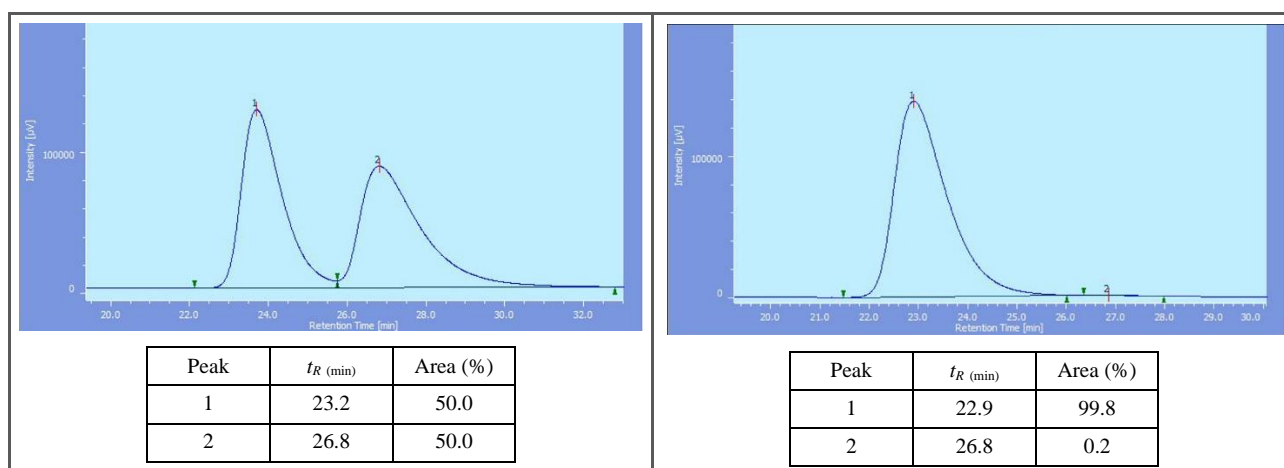

#### (S)-2-Phenyl-2-(3,5-dimethyl-1H-pyrrol-2-yl)-2-(tert-butoxycarbonylamino)acetonitrile (**4ad**)

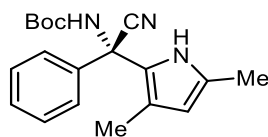

**4ad** (15.8 mg, 97% yield, 99.6% ee) was obtained by the general procedure using iminonitrile **1a** (11.5 mg, 0.05 mmol), pyrrole **2d** (6.2  $\mu\text{L}$ , 0.06 mmol) and catalyst **3a** (1.9 mg, 2.5  $\mu\text{mol}$ ). The crude **4ad** was purified by silica-gel column chromatography (eluent: Hexane/AcOEt, 80:20).

Yellow oil. **Optical Rotation:**  $[\alpha]_{\text{D}}^{25.0} = -19.0$  (99% ee,  $c$  0.50,  $\text{CHCl}_3$ );  **$^1\text{H NMR}$**  ( $\text{CDCl}_3$ , 300 MHz)  $\delta$  7.62-7.58 (m, 2H), 7.51-7.43 (m, 3H), 7.05 (br, 1H), 5.72 (d,  $J = 3.0$  Hz, 1H), 5.27 (s, 1H), 2.12 (s, 3H), 2.07 (s, 3H), 1.34 (s, 9H);  **$^{13}\text{C NMR}$**  ( $\text{CDCl}_3$ , 125 MHz)  $\delta$  153.1, 137.2, 129.2, 129.2, 127.6, 126.2, 119.9, 118.7, 118.2, 110.9, 81.8, 56.8, 28.0, 12.8, 11.8; **IR** (ATR) 3341, 2978, 2929, 2239, 1701, 1366, 1158, 1052, 753  $\text{cm}^{-1}$ ; **HRMS** (ESI)  $m/z$ :  $[\text{M}+\text{Na}]^+$  calculated for  $\text{C}_{19}\text{H}_{23}\text{N}_3\text{NaO}_2$  348.1682; found 348.1687; **HPLC** (CHIRALPAK IH-3, Hexane/ $i$ PrOH = 95:5, 1.0 mL/min, 215 nm) 99.6% ee,  $t_{\text{R}}$  23.0 (major),  $t_{\text{R}}$  26.8 (minor) min.

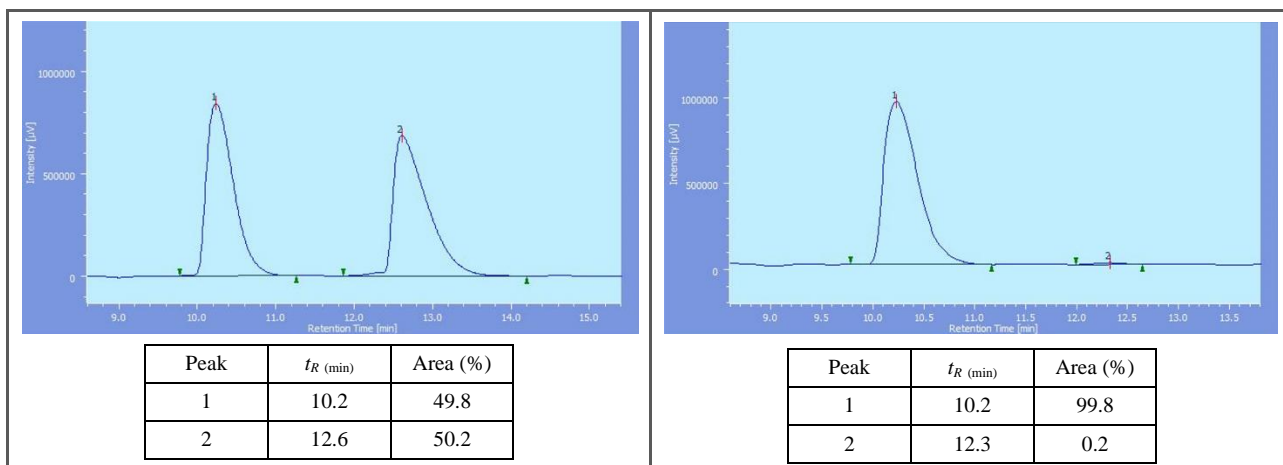

**(S)-2-Phenyl-2-(2,5-dimethyl-1H-pyrrol-3-yl)-2-(tert-butoxycarbonylamino)acetonitrile (4ae)**

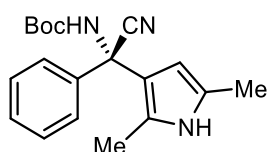

**4ae** (14.0 mg, 86% yield, 80% ee) was obtained by the general procedure using iminonitrile **1a** (11.5 mg, 0.05 mmol), pyrrole **2a** (6.1  $\mu$ L, 0.06 mmol) and catalyst **3a** (1.9 mg, 2.5  $\mu$ mol). The crude **4ae** was purified by silica-gel column chromatography (eluent: Hexane/AcOEt, 80:20).

Yellow oil. **Optical Rotation:**  $[\alpha]_D^{25.0} = -26.9$  (80% ee,  $c$  0.49,  $\text{CHCl}_3$ );  **$^1\text{H NMR}$**  ( $\text{CDCl}_3$ , 300 MHz)  $\delta$  7.88 (br, 1H), 7.56-7.48 (m, 2H), 7.42-7.31 (m, 3H), 5.27 (s, 1H), 5.23 (s, 1H), 2.19 (s, 3H), 2.08 (s, 3H), 1.33 (s, 9H);  **$^{13}\text{C NMR}$**  ( $\text{CDCl}_3$ , 125 MHz)  $\delta$  153.4, 139.5, 128.5, 128.1, 125.9, 125.1, 124.0, 119.5, 117.4, 106.0, 81.4, 56.9, 28.1, 12.6, 12.3; **IR** (ATR) 3353, 2977, 2238, 1701, 1367, 1248, 1158, 1099, 1052, 697  $\text{cm}^{-1}$ ; **HRMS** (ESI)  $m/z$ :  $[\text{M}+\text{Na}]^+$  calculated for  $\text{C}_{19}\text{H}_{23}\text{N}_3\text{NaO}_2$  348.1682; found 348.1696; **HPLC** (CHIRALPAK IH-3, Hexane/ $i$ PrOH = 95:5, 1.0 mL/min, 215 nm) 80% ee,  $t_R$  23.0 (major),  $t_R$  26.8 (minor) min.

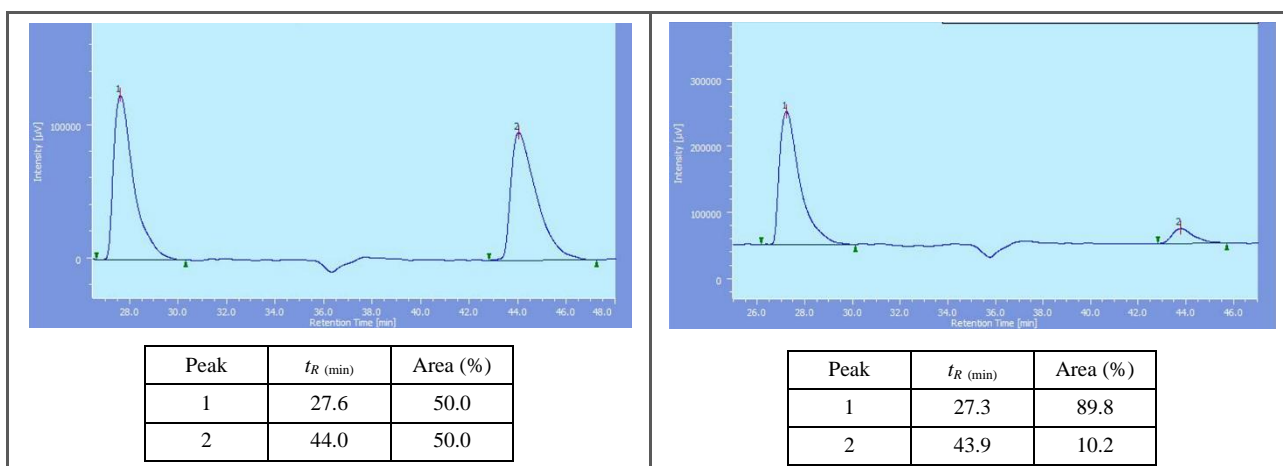



## General procedure for the asymmetric synthesis of **6**

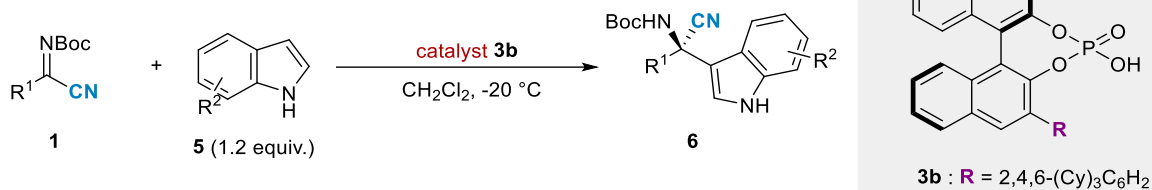

To a flame-dried flask, catalyst **3b** (5 mol%) and  $\alpha$ -iminonitrile **1** (1.0 equiv., 0.05 mmol) were dissolved in dry CH<sub>2</sub>Cl<sub>2</sub> (0.1 M) and cooled to 0 °C. Indole **5** (1.2 equiv.) was added in one portion, and the solution was stirred at that temperature for 12 hours. The reaction mixture was concentrated under reduced pressure. Product **6** was purified by silica-gel column chromatography.

### (*R*)-2-(1*H*-Indol-3-yl)-2-phenyl-2-(*tert*-butoxycarbonylamino)acetonitrile (**6aa**)

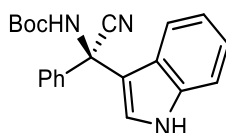

**6aa** (16.2 mg, 93% yield, 95% ee) was obtained by the general procedure using iminonitrile **1a** (11.5 mg, 0.05 mmol), indole **5a** (7.0 mg, 0.06 mmol) and catalyst **3b** (2.5 mg, 2.5  $\mu$ mol). The crude **6aa** was purified by silica-gel column chromatography (eluent: Hexane/AcOEt, 70:30).

White solid. **m.p.**: 193.5-194.0 °C. **Optical Rotation**:  $[\alpha]_{\text{D}}^{25.0} = -232.2$  (95% ee,  $c$  0.18, CHCl<sub>3</sub>); **<sup>1</sup>H NMR** (CDCl<sub>3</sub>, 300 MHz)  $\delta$  8.20 (br, 1H), 7.86 (s, 1H), 7.67-7.64 (m, 2H), 7.46-7.38 (m, 4H), 7.30-7.20 (m, 2H), 6.60 (br, 1H), 5.49 (br, 1H), 1.36 (s, 9H); **<sup>13</sup>C NMR** (CDCl<sub>3</sub>, 125 MHz)  $\delta$  153.3, 138.4, 136.9, 128.7, 128.6, 125.9, 124.9, 123.8, 123.3, 120.9, 119.6, 119.1, 115.0, 111.8, 81.5, 56.9, 28.1; **IR** (ATR) 3336, 2978, 2245, 1702, 1480, 1367, 1158, 742, 698 cm<sup>-1</sup>; **HRMS** (ESI)  $m/z$ :  $[\text{M}+\text{Na}]^+$  calculated for C<sub>21</sub>H<sub>21</sub>N<sub>3</sub>NaO<sub>2</sub> 370.1526; found 370.1531; **HPLC** (CHIRALPAK IBN-3, Hexane/<sup>*i*</sup>PrOH = 85:15, 1.0 mL/min, 215 nm) 95% ee,  $t_R$  7.9 (major),  $t_R$  9.2 (minor) min.

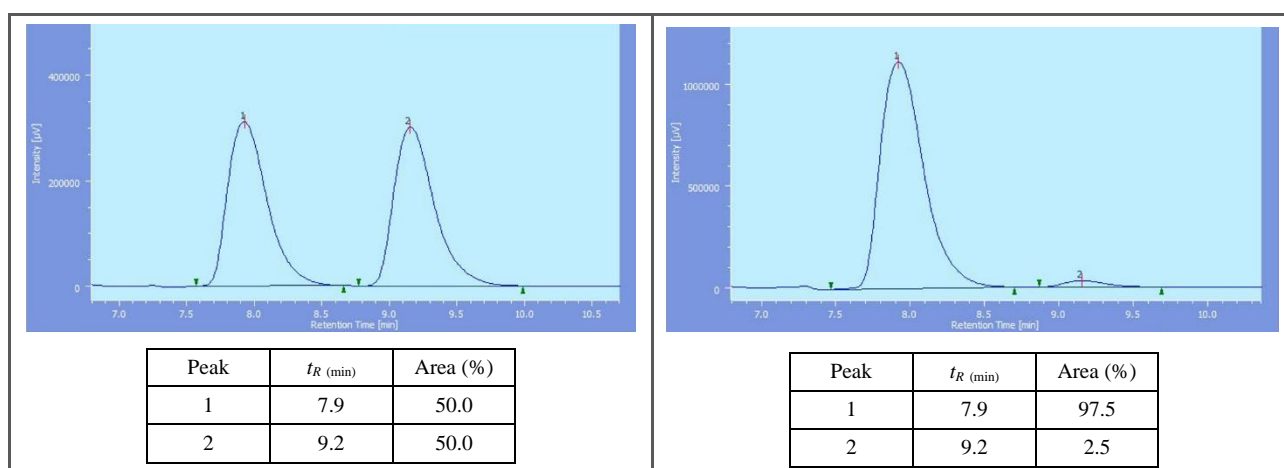

**(R)-2-(1H-Indol-3-yl)-2-(4-bromophenyl)-2-(tert-butoxycarbonylamino)acetonitrile (6ba)**

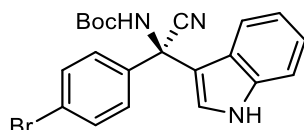

**6ba** (19.8 mg, 93% yield, 98% ee) was obtained by the general procedure using iminonitrile **1d** (15.5 mg, 0.05 mmol), indole **5a** (7.0 mg, 0.06 mmol) and catalyst **3b** (2.5 mg, 2.5  $\mu$ mol). The crude **6ba** was purified by silica-gel column chromatography (eluent: Hexane/AcOEt, 80:20).

Purple oil. **Optical Rotation:**  $[\alpha]_D^{25.0} = +65.5$  (98% ee,  $c$  0.50,  $\text{CHCl}_3$ );  **$^1\text{H}$  NMR** ( $\text{CDCl}_3$ , 300 MHz)  $\delta$  8.30 (br, 1H), 7.82 (d,  $J = 7.7$  Hz, 1H), 7.60-7.48 (m, 4H), 7.40-7.27 (m, 2H), 7.25-7.19 (m, 1H), 6.60 (s, 1H), 5.51 (br, 1H), 1.39 (s, 9H);  **$^{13}\text{C}$  NMR** ( $\text{CDCl}_3$ , 125 MHz)  $\delta$  153.2, 137.5, 136.9, 131.8, 127.7, 124.7, 123.5, 122.7, 121.1, 119.4, 118.7, 114.5, 111.9, 111.7, 82.0, 56.6, 28.1; **IR** (ATR) 3349, 2979, 2248, 1701, 1485, 1367, 1158, 1010, 813, 743  $\text{cm}^{-1}$ ; **HRMS** (ESI)  $m/z$ :  $[\text{M}+\text{Na}]^+$  calculated for  $\text{C}_{21}\text{H}_{20}\text{BrN}_3\text{NaO}_2$  448.0631; found 448.0636; **HPLC** (CHIRALPAK IBN-3, Hexane/ $i$ PrOH = 85:15, 1.0 mL/min, 215 nm) 98% ee,  $t_R$  8.1 (major),  $t_R$  9.5 (minor) min.

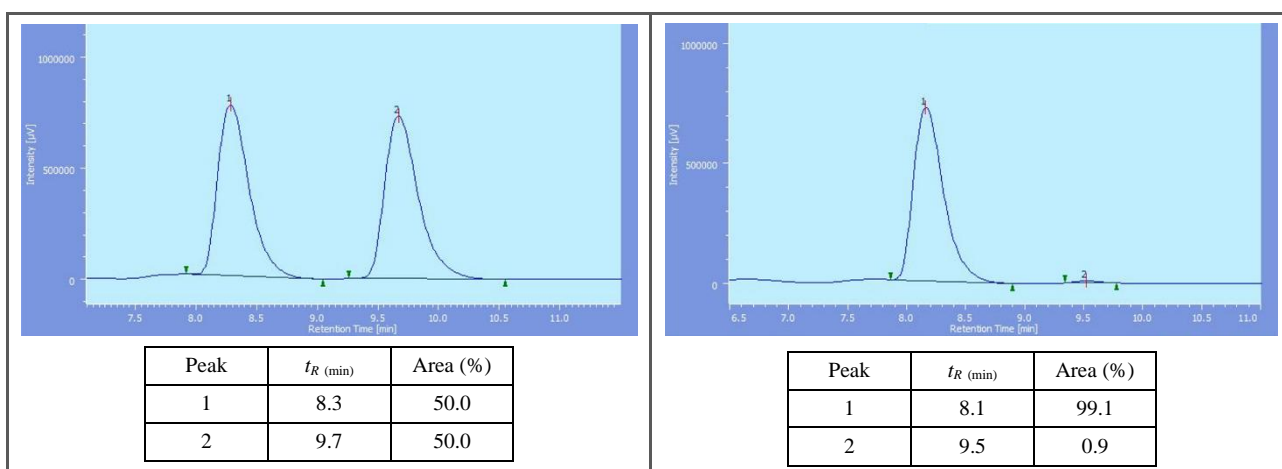

**(R)-2-(1H-Indol-3-yl)-2-(4-methylphenyl)-2-(tert-butoxycarbonylamino)acetonitrile (6ca)**

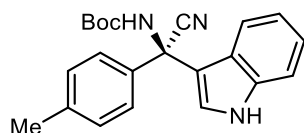

**6ca** (17.2 mg, 95% yield, 96% ee) was obtained by the general procedure using iminonitrile **1f** (12.2 mg, 0.05 mmol), indole **5a** (7.0 mg, 0.06 mmol) and catalyst **3b** (2.5 mg, 2.5  $\mu$ mol). The crude **6ca** was purified by silica-gel column chromatography (eluent: Hexane/AcOEt, 70:30).

Pale brown oil. **Optical Rotation:**  $[\alpha]_D^{25.0} = -14.8$  (96% ee,  $c$  0.34,  $\text{CHCl}_3$ );  **$^1\text{H}$  NMR** ( $\text{CDCl}_3$ , 300 MHz)  $\delta$  8.30 (s, 1H), 7.82 (d,  $J = 7.7$  Hz, 1H), 7.51-7.49 (m, 3H), 7.37-7.16 (m, 4H), 6.61 (s, 1H), 5.47 (br, 1H), 2.37 (s, 3H), 1.37 (s, 9H);  **$^{13}\text{C}$  NMR** ( $\text{CDCl}_3$ , 125 MHz)  $\delta$  153.4, 138.4, 136.9, 135.4, 129.3, 125.8, 124.9, 123.8, 123.2, 120.8, 119.6, 119.2, 115.1, 111.8, 81.6, 56.7, 28.1, 21.1; **IR** (ATR) 3345, 2979, 2239, 1701, 1479, 1367, 1159, 1049, 808, 743  $\text{cm}^{-1}$ ; **HRMS** (ESI)  $m/z$ :  $[\text{M}+\text{Na}]^+$  calculated for  $\text{C}_{22}\text{H}_{23}\text{N}_3\text{NaO}_2$  384.1682; found 384.1680; **HPLC** (CHIRALPAK IBN-3, Hexane/ $i$ PrOH = 85:15, 1.0 mL/min, 215 nm) 96% ee,  $t_R$  7.4 (major),  $t_R$  8.4 (minor) min.

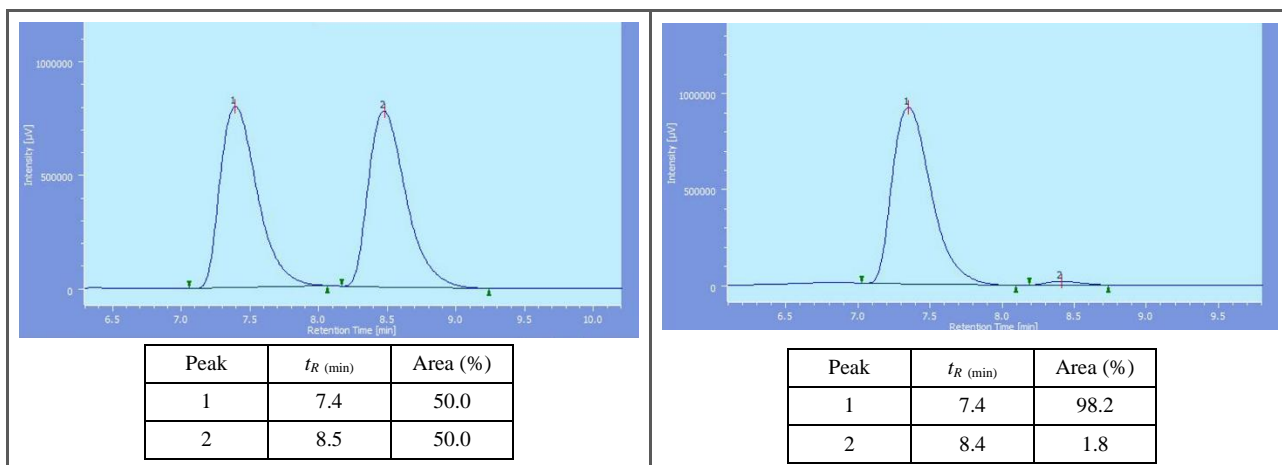

**(R)-2-(1H-Indol-3-yl)-2-(2-thienyl)-2-(tert-butoxycarbonylamino)acetonitrile (6da)**

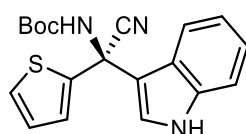

**6da** (17.3 mg, 98% yield, 67% ee) was obtained by the general procedure using iminonitrile **1n** (11.8 mg, 0.05 mmol), indole **5a** (7.0 mg, 0.06 mmol) and catalyst **3b** (2.5 mg, 2.5  $\mu$ mol). The crude **6da** was purified by silica-gel column chromatography (eluent: Hexane/AcOEt, 70:30).

Brown oil. **Optical Rotation:**  $[\alpha]_D^{25.0} = +2.3$  (67% ee,  $c$  0.45,  $\text{CHCl}_3$ );  **$^1\text{H NMR}$**  ( $\text{CDCl}_3$ , 300 MHz)  $\delta$  8.45 (br, 1H), 7.77 (d,  $J = 7.8$  Hz, 1H), 7.38-7.27 (m, 3H), 7.24-7.16 (m, 2H), 7.01-6.96 (m, 2H), 5.57 (br, 1H), 1.41 (s, 9H);  **$^{13}\text{C NMR}$**  ( $\text{CDCl}_3$ , 125 MHz)  $\delta$  153.2, 143.3, 136.9, 126.9, 126.7, 126.1, 124.5, 123.5, 123.2, 120.8, 119.6, 118.5, 114.7, 111.9, 81.8, 53.6, 28.1; **IR** (ATR) 3727, 3346, 2360, 2293, 1699, 1459, 1367, 1157, 1024, 840, 703  $\text{cm}^{-1}$ ; **HRMS** (ESI)  $m/z$ :  $[\text{M}+\text{Na}]^+$  calculated for  $\text{C}_{19}\text{H}_{19}\text{N}_3\text{NaO}_2\text{S}$  376.1090; found 376.1098; **HPLC** (CHIRALPAK IM, Hexane/ $\text{PrOH} = 88:12$ , 1.0 mL/min, 215 nm) 67% ee,  $t_R$  12.5 (major),  $t_R$  14.0 (minor) min.

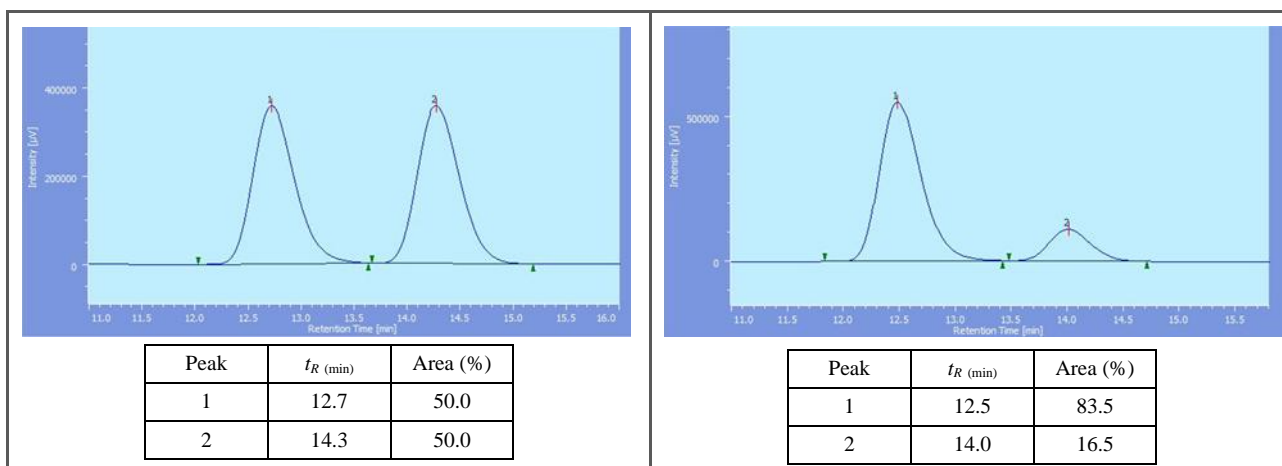

**(R)-2-(1H-Indol-3-yl)-2-(1-naphthyl)-2-(tert-butoxycarbonylamino)acetonitrile (6ea)**

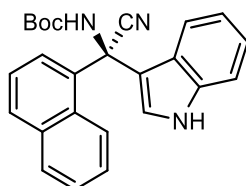

**6ea** (14.5 mg, 73% yield, 99% ee) was obtained by the general procedure using iminonitrile **1l** (14.0 mg, 0.05 mmol),

indole **5a** (7.0 mg, 0.06 mmol) and catalyst **3b** (2.5 mg, 2.5  $\mu$ mol). The crude **6ea** was purified by silica-gel column chromatography (eluent: Hexane/AcOEt, 75:25).

Yellow oil. **Optical Rotation:**  $[\alpha]_D^{25.0} = +33.1$  (99% ee,  $c$  0.23,  $\text{CHCl}_3$ );  **$^1\text{H NMR}$**  ( $\text{CDCl}_3$ , 300 MHz)  $\delta$  8.51 (s, 1H), 8.29 (d,  $J = 8.5$  Hz, 2H), 7.88 (d,  $J = 8.1$  Hz, 2H), 7.77-7.72 (m, 2H), 7.49-7.37 (m, 4H), 7.33-7.12 (m, 2H), 6.70 (s, 1H), 5.68 (br, 1H), 1.31 (s, 9H);  **$^{13}\text{C NMR}$**  ( $\text{CDCl}_3$ , 125 MHz)  $\delta$  174.1, 154.9, 136.8, 128.4, 128.0, 127.3, 126.2, 125.2, 122.4, 120.0, 116.2, 111.6, 80.0, 66.2, 28.3; **IR** (ATR) 3344, 2925, 2854, 2318, 1708, 1482, 1367, 1160, 744  $\text{cm}^{-1}$ ; **HRMS** (ESI)  $m/z$ :  $[\text{M}+\text{Na}]^+$  calculated for  $\text{C}_{25}\text{H}_{23}\text{N}_3\text{NaO}_2$  420.1682; found 420.1683; **HPLC** (CHIRALPAK IBN-3, Hexane/ $i$ PrOH = 88:12, 1.0 mL/min, 215 nm) 99% ee,  $t_R$  10.2 (major),  $t_R$  13.1 (minor) min.

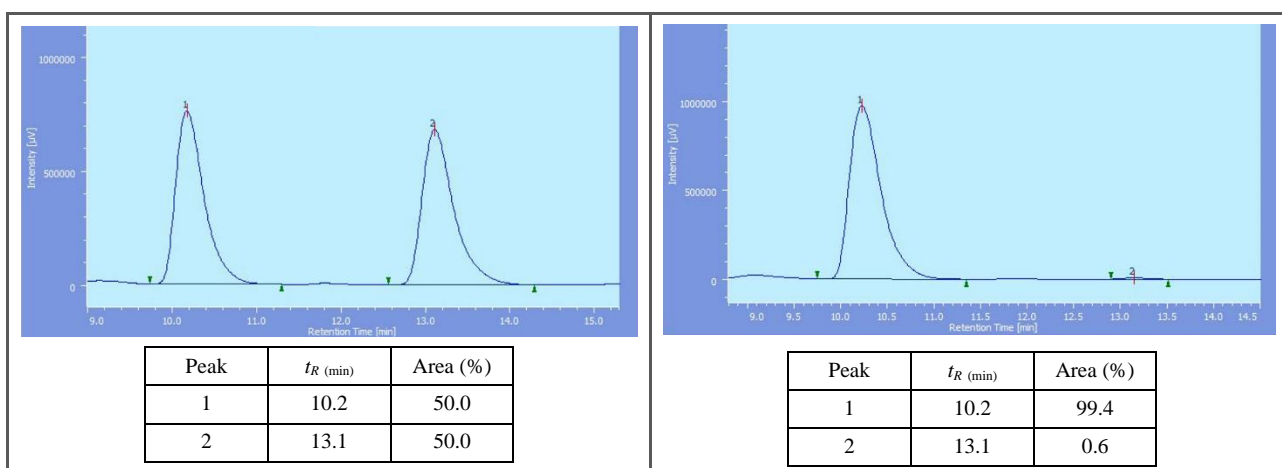

**(R)-2-(1H-Indol-3-yl)-2-(2-naphthyl)-2-(tert-butoxycarbonylamino)acetonitrile (6fa)**

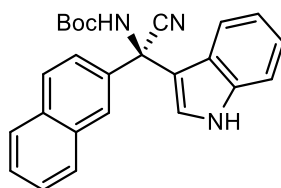

**6fa** (16.3 mg, 82% yield, 97% ee) was obtained by the general procedure using iminonitrile **1m** (14.0 mg, 0.05 mmol), indole **5a** (7.0 mg, 0.06 mmol) and catalyst **3b** (2.5 mg, 2.5  $\mu$ mol). The crude **6fa** was purified by silica-gel column chromatography (eluent: Hexane/AcOEt, 75:25).

Pale yellow oil. **Optical Rotation:**  $[\alpha]_D^{25.0} = +63.8$  (97% ee,  $c$  0.23,  $\text{CHCl}_3$ );  **$^1\text{H NMR}$**  ( $\text{CDCl}_3$ , 300 MHz)  $\delta$  8.26 (s, 1H), 8.17 (s, 1H), 7.90-7.85 (m, 5H), 7.68-7.65 (m, 1H), 7.55-7.52 (m, 2H), 7.37-7.34 (m, 1H), 7.28-7.18 (m, 1H), 6.54 (s, 1H), 5.60 (br, 1H), 1.33 (s, 9H);  **$^{13}\text{C NMR}$**  ( $\text{CDCl}_3$ , 125 MHz)  $\delta$  153.4, 136.9, 133.2, 133.0, 128.7, 128.6, 128.4, 127.7, 126.8, 126.7, 125.4, 125.0, 123.8, 123.8, 123.4, 121.0, 119.6, 119.1, 114.9, 111.9, 81.7, 57.0, 28.1; **IR** (ATR) 3314, 2926, 2237, 1701, 1479, 1366, 1157, 1051, 744  $\text{cm}^{-1}$ ; **HRMS** (ESI)  $m/z$ :  $[\text{M}+\text{Na}]^+$  calculated for  $\text{C}_{25}\text{H}_{23}\text{N}_3\text{NaO}_2$  420.1682; found 420.1689; **HPLC** (CHIRALPAK IBN-3, Hexane/ $i$ PrOH = 88:12, 1.0 mL/min, 215 nm) 97% ee,  $t_R$  11.7 (major),  $t_R$  15.2 (minor) min.

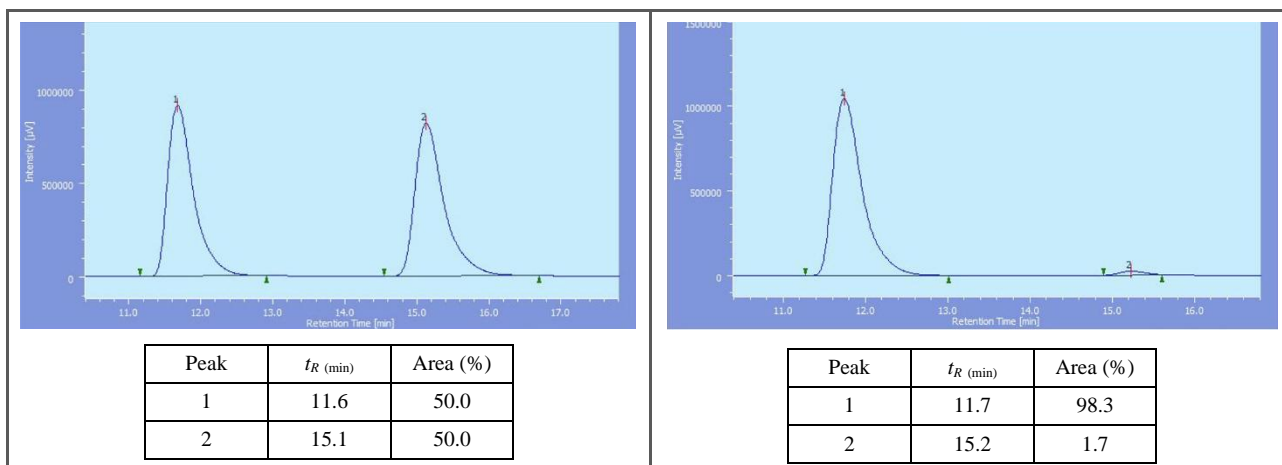

**(R)-2-(2-Methyl-1H-indol-3-yl)-2-phenyl-2-(tert-butoxycarbonylamino)acetonitrile (6ab)**

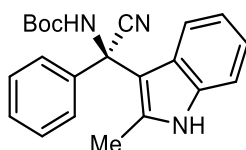

**6ab** (17.2 mg, 95% yield, 93% ee) was obtained by the general procedure using iminonitrile **1a** (11.5 mg, 0.05 mmol), indole **5b** (7.9 mg, 0.06 mmol) and catalyst **3b** (2.5 mg, 2.5  $\mu$ mol). The crude **6ab** was purified by silica-gel column chromatography (eluent: Hexane/AcOEt, 70:30).

Yellow oil. **Optical Rotation:**  $[\alpha]_D^{25.0} = +9.0$  (93% ee,  $c$  0.34,  $\text{CHCl}_3$ );  **$^1\text{H NMR}$**  ( $\text{CDCl}_3$ , 300 MHz)  $\delta$  8.04 (br, 1H), 7.67-7.63 (m, 2H), 7.47-7.23 (m, 5H), 7.16-7.02 (m, 3H), 5.43 (br, 1H), 1.99 (s, 3H), 1.36 (s, 9H);  **$^{13}\text{C NMR}$**  ( $\text{CDCl}_3$ , 125 MHz)  $\delta$  153.3, 138.7, 134.6, 133.7, 128.9, 128.8, 126.6, 125.9, 125.8, 122.0, 120.4, 119.3, 110.6, 108.1, 81.5, 57.5, 28.1, 13.2; **IR** (ATR) 3339, 2979, 2310, 1701, 1482, 1367, 1256, 1159, 890, 742  $\text{cm}^{-1}$ ; **HRMS** (ESI)  $m/z$ :  $[\text{M}+\text{Na}]^+$  calculated for  $\text{C}_{22}\text{H}_{23}\text{N}_3\text{NaO}_2$  384.1682; found 384.1689; **HPLC** (CHIRALPAK IBN-3, Hexane/ $i$ PrOH = 88:12, 1.0 mL/min, 215 nm) 93% ee,  $t_R$  10.4 (major),  $t_R$  13.1 (minor) min.

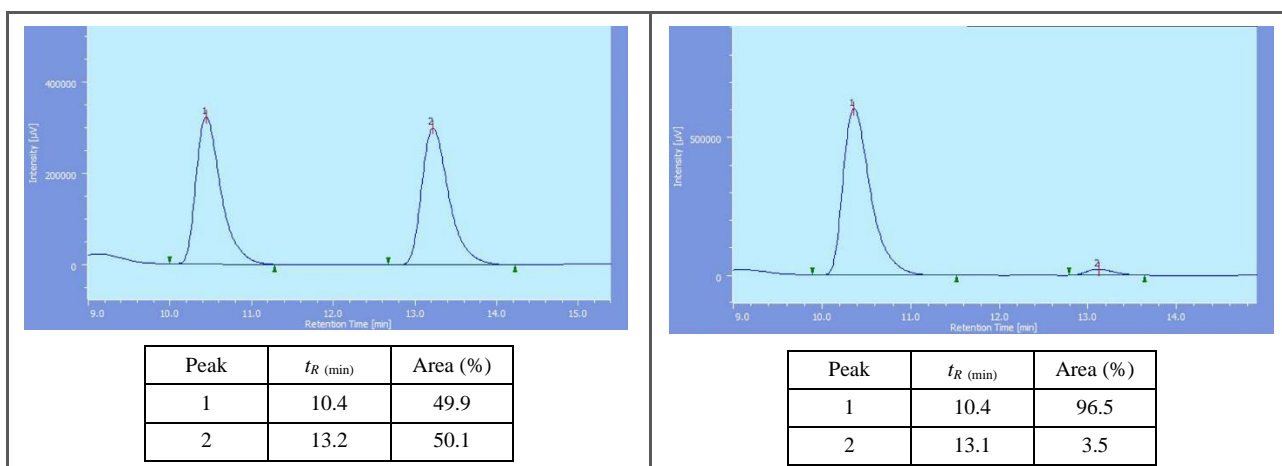

**(R)-2-Phenyl-2-(2-phenyl-1H-indol-3-yl)-2-(tert-butoxycarbonylamino)acetonitrile (6ac)**

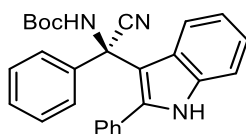

**6ac** (19.3 mg, 91% yield, 89% ee) was obtained by the general procedure using iminonitrile **1a** (11.5 mg, 0.05 mmol), indole **5c** (11.6 mg, 0.06 mmol) and catalyst **3b** (2.5 mg, 2.5  $\mu$ mol). The crude **6ac** was purified by silica-

gel column chromatography (eluent: Hexane/AcOEt, 78:22).

Yellow oil. **Optical Rotation:**  $[\alpha]_D^{25.0} = +19.3$  (89% ee,  $c$  0.57,  $\text{CHCl}_3$ );  **$^1\text{H NMR}$**  ( $\text{CDCl}_3$ , 300 MHz)  $\delta$  8.30 (br, 1H), 7.58-7.55 (m, 3H), 7.37-7.20 (m, 10H), 7.14-7.09 (m, 1H), 5.32 (s, 1H), 1.26 (s, 9H);  **$^{13}\text{C NMR}$**  ( $\text{CDCl}_3$ , 125 MHz)  $\delta$  152.9, 138.9, 136.8, 135.3, 132.2, 129.8, 129.0, 128.8, 128.7, 128.2, 127.2, 126.1, 122.9, 120.8, 120.5, 119.0, 11.1, 109.0, 81.2, 57.6, 28.0; **IR** (ATR) 3316, 2978, 2239, 1697, 1487, 1366, 1156, 1001, 743, 664  $\text{cm}^{-1}$ ; **HRMS** (ESI)  $m/z$ :  $[\text{M}+\text{Na}]^+$  calculated for  $\text{C}_{27}\text{H}_{25}\text{N}_3\text{NaO}_2$  446.1839; found 446.1846; **HPLC** (CHIRALPAK IBN-3, Hexane/ $i$ PrOH = 88:12, 1.0 mL/min, 215 nm) 89% ee,  $t_R$  9.3 (major),  $t_R$  11.9 (minor) min.

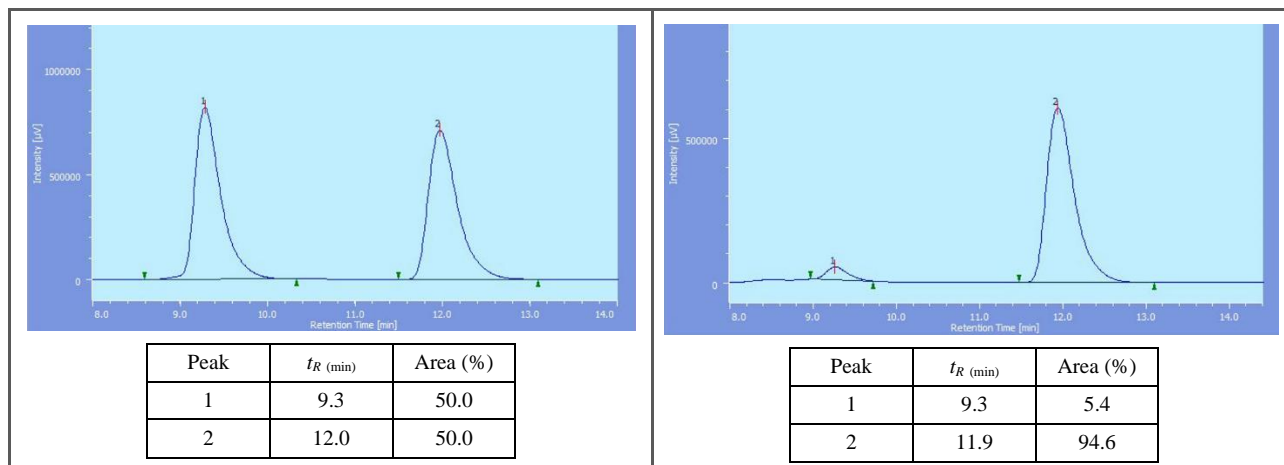

**(R)-2-(4-Methyl-1H-indol-3-yl)-2-phenyl-2-(tert-butoxycarbonylamino)acetonitrile (6ad)**

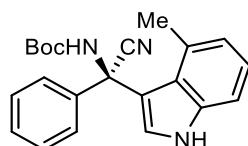

**6ad** (17.5 mg, 97% yield, 89% ee) was obtained by the general procedure using iminonitrile **1a** (11.5 mg, 0.05 mmol), indole **5d** (7.5  $\mu\text{L}$ , 0.06 mmol) and catalyst **3b** (2.5 mg, 2.5  $\mu\text{mol}$ ). The crude **6ad** was purified by silica-gel column chromatography (eluent: Hexane/AcOEt, 70:30).

Pale yellow oil. **Optical Rotation:**  $[\alpha]_D^{25.0} = -27.4$  (89% ee,  $c$  0.05,  $\text{CHCl}_3$ );  **$^1\text{H NMR}$**  ( $\text{CDCl}_3$ , 300 MHz)  $\delta$  8.30 (br, 1H), 7.65-7.62 (m, 2H), 7.44-7.41 (m, 3H), 7.20-7.11 (m, 2H), 7.00 (d,  $J = 6.7$  Hz, 1H), 6.26 (br, 1H), 5.52 (br, 1H), 2.86 (s, 3H), 1.36 (s, 9H);  **$^{13}\text{C NMR}$**  ( $\text{CDCl}_3$ , 125 MHz)  $\delta$  152.8, 139.3, 137.9, 130.4, 128.8, 128.6, 126.7, 126.4, 123.6, 123.4, 123.3, 120.2, 115.8, 109.6, 81.6, 57.2, 28.2, 22.4; **IR** (ATR) 3337, 2980, 2309, 1692, 1482, 1366, 1157, 1050, 889, 747  $\text{cm}^{-1}$ ; **HRMS** (ESI)  $m/z$ :  $[\text{M}+\text{Na}]^+$  calculated for  $\text{C}_{22}\text{H}_{23}\text{N}_3\text{NaO}_2$  384.1682; found 384.1689; **HPLC** (CHIRALPAK IBN-3, Hexane/ $i$ PrOH = 88:12, 1.0 mL/min, 215 nm) 89% ee,  $t_R$  9.2 (major),  $t_R$  10.2 (minor) min.

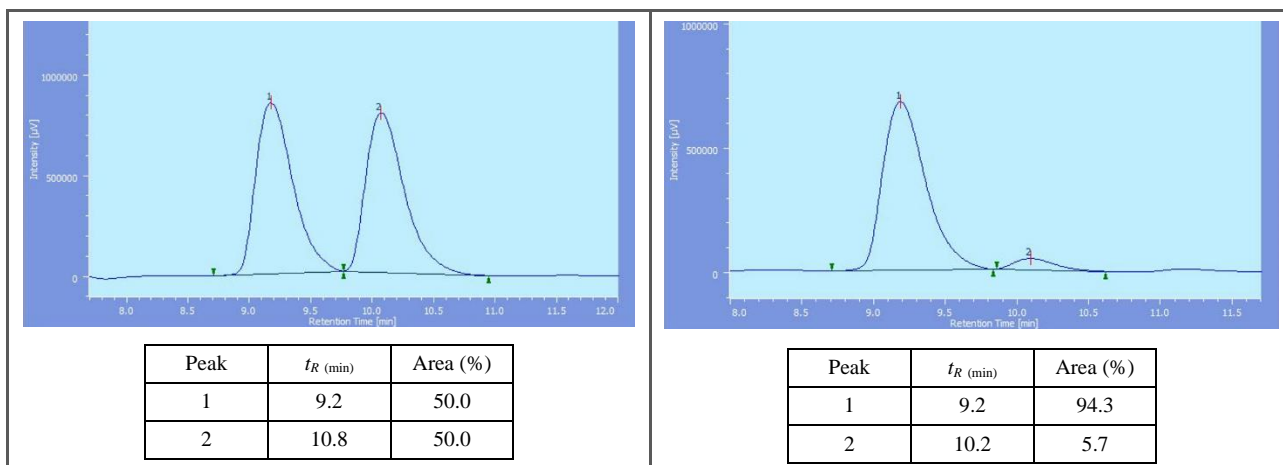

**(R)-2-(5-Bromo-1H-indol-3-yl)-2-phenyl-2-(tert-butoxycarbonylamino)acetonitrile (6ae)**

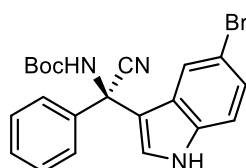

**6ae** (20.7 mg, 97% yield, 92% ee) was obtained by the general procedure using iminonitrile **1a** (11.5 mg, 0.05 mmol), indole **5e** (11.8 mg, 0.06 mmol) and catalyst **3b** (2.5 mg, 2.5  $\mu$ mol). The crude **6ae** was purified by silica-gel column chromatography (eluent: Hexane/AcOEt, 70:30).

Pale brown oil. **Optical Rotation:**  $[\alpha]_D^{25.0} = +52.2$  (92% ee,  $c$  0.30,  $\text{CHCl}_3$ );  **$^1\text{H NMR}$**  ( $\text{CDCl}_3$ , 300 MHz)  $\delta$  8.54 (br, 1H), 7.89 (s, 1H), 7.60-7.55 (m, 2H), 7.45-7.37 (m, 3H), 7.31-7.28 (m, 1H), 7.17 (d,  $J = 8.7$  Hz, 1H), 5.45 (br, 1H), 1.37 (s, 9H);  **$^{13}\text{C NMR}$**  ( $\text{CDCl}_3$ , 125 MHz)  $\delta$  153.4, 138.2, 135.5, 128.9, 128.9, 126.2, 126.1, 125.9, 125.7, 125.4, 121.9, 119.0, 114.1, 113.4, 81.9, 56.8, 28.1; **IR** (ATR) 3320, 2979, 2242, 1701, 1482, 1366, 1049, 1001, 924, 747  $\text{cm}^{-1}$ ; **HRMS** (ESI)  $m/z$ :  $[\text{M}+\text{Na}]^+$  calculated for  $\text{C}_{21}\text{H}_{20}\text{BrN}_3\text{NaO}_2$  448.0631; found 448.0626; **HPLC** (CHIRALPAK IBN-3, Hexane/ $i$ PrOH = 88:12, 1.0 mL/min, 215 nm) 92% ee,  $t_R$  9.4 (major),  $t_R$  10.9 (minor) min.

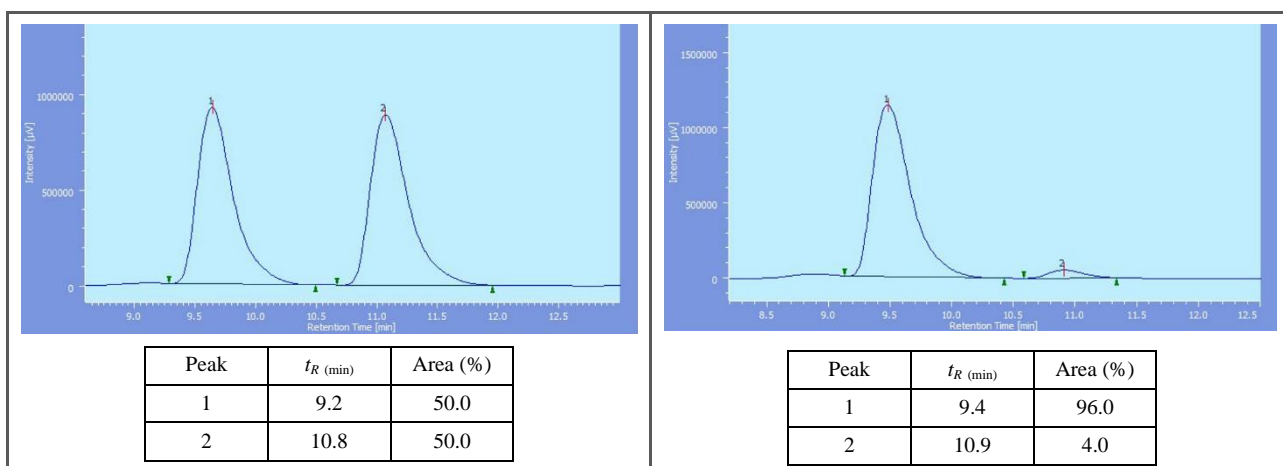

**(R)-2-(6-Chloro-1H-indol-3-yl)-2-phenyl-2-(tert-butoxycarbonylamino)acetonitrile (6af)**

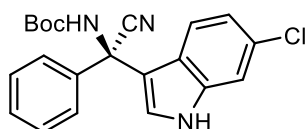

**6af** (18.5 mg, 97% yield, 90% ee) was obtained by the general procedure using iminonitrile **1a** (11.5 mg, 0.05 mmol), indole **5f** (9.1 mg, 0.06 mmol) and catalyst **3b** (2.5 mg, 2.5  $\mu$ mol). The crude **6af** was purified by silica-gel column

chromatography (eluent: Hexane/AcOEt, 70:30).

White solid. **m.p.**: 211.0-212.0 °C. **Optical Rotation**:  $[\alpha]_D^{25.0} = +21.7$  (90% ee,  $c$  0.53,  $\text{CHCl}_3$ );  **$^1\text{H NMR}$**  ( $\text{CDCl}_3$ , 300 MHz)  $\delta$  8.33 (br, 1H), 7.70 (d,  $J = 8.6$  Hz, 1H), 7.62-7.59 (m, 2H), 7.43-7.40 (m, 3H), 7.35-7.34 (m, 1H), 7.16 (dd,  $J = 8.6, 1.8$  Hz, 1H), 6.63 (s, 1H), 5.44 (br, 1H), 1.36 (s, 9H);  **$^{13}\text{C NMR}$**  ( $\text{CDCl}_3$ , 125 MHz)  $\delta$  153.3, 137.3, 130.1, 129.3, 128.8, 128.5, 125.9, 125.4, 122.4, 121.7, 120.5, 119.0, 115.1, 111.8, 81.8, 56.9, 28.1; **IR** (ATR) 3352, 3266, 2927, 2248, 1693, 1483, 1364, 1154, 1059, 905, 809, 690  $\text{cm}^{-1}$ ; **HRMS** (ESI)  $m/z$ :  $[\text{M}+\text{Na}]^+$  calculated for  $\text{C}_{21}\text{H}_{20}\text{ClN}_3\text{NaO}_2$  404.1136; found 404.1142; **HPLC** (CHIRALPAK IBN-3, Hexane/ $i$ PrOH = 88:12, 1.0 mL/min, 215 nm) 90% ee,  $t_R$  9.3 (major),  $t_R$  10.6 (minor) min.

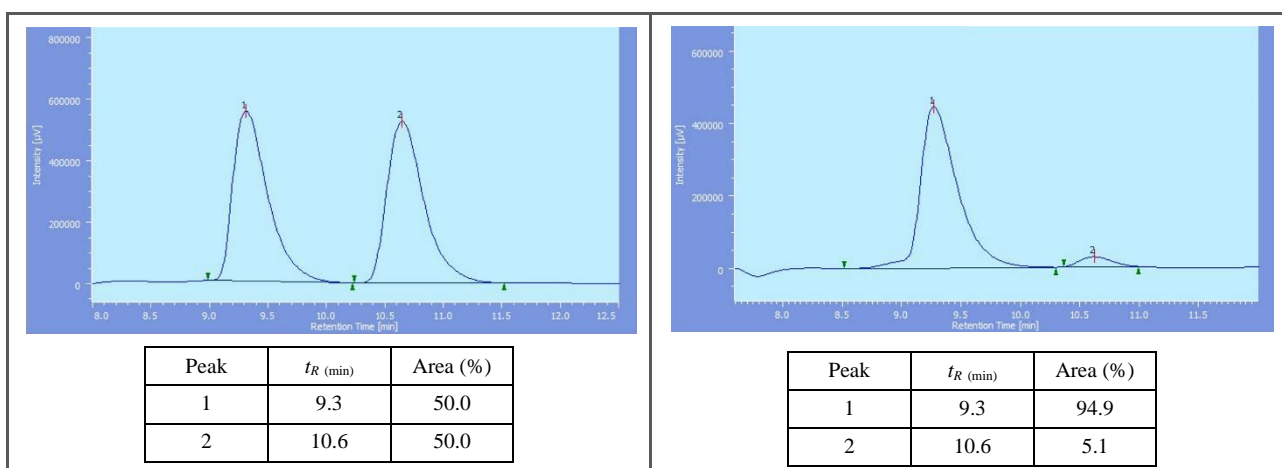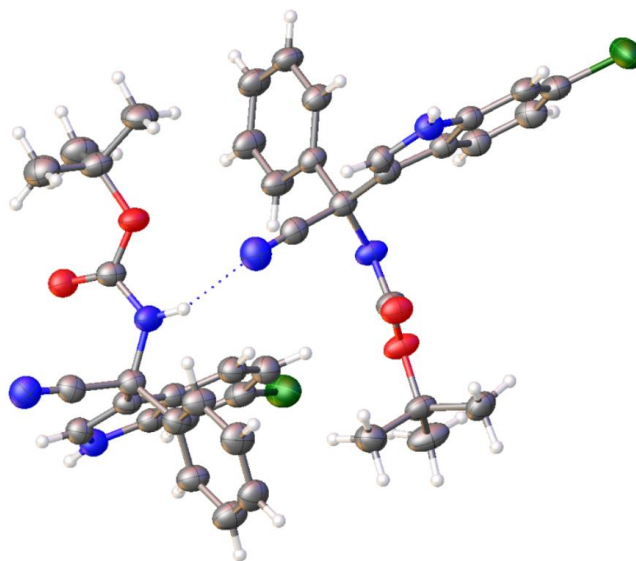

|                        |                                                           |
|------------------------|-----------------------------------------------------------|
| Empirical Formula      | $\text{C}_{21}\text{H}_{20}\text{N}_3\text{O}_2\text{Cl}$ |
| Formula weight         | 381.85                                                    |
| Temperature/K          | 153.15                                                    |
| Crystal system         | triclinic                                                 |
| Space group            | $P_1$                                                     |
| $a/\text{\AA}$         | 9.7777(3)                                                 |
| $b/\text{\AA}$         | 10.8697(2)                                                |
| $c/\text{\AA}$         | 11.3717(3)                                                |
| $\alpha/^\circ$        | 62.837                                                    |
| $\beta/^\circ$         | 64.591                                                    |
| $\gamma/^\circ$        | 74.964                                                    |
| Volume/ $\text{\AA}^3$ | 968.24(5)                                                 |



|                                                |                                                               |
|------------------------------------------------|---------------------------------------------------------------|
| Z                                              | 2                                                             |
| $\rho_{\text{calc}}/\text{cm}^3$               | 1.310                                                         |
| $\mu/\text{mm}^{-1}$                           | 1.914                                                         |
| F(000)                                         | 400.0                                                         |
| Crystal size/ $\text{mm}^3$                    | 0.084 x 0.61 x 0.044                                          |
| Radiation                                      | CuK $\alpha$ ( $\lambda = 1.54184$ )                          |
| 2 $\theta$ range for data collection/ $^\circ$ | 9.174 to 153.05                                               |
| Index ranges                                   | $-12 \leq h \leq 12, -13 \leq k \leq 13, -14 \leq l \leq 14$  |
| Reflections collected                          | 73028                                                         |
| Independent reflections                        | 7705 [ $R_{\text{int}} = 0.0784, R_{\text{sigma}} = 0.0394$ ] |
| Data/restraints/parameters                     | 7705/3/493                                                    |
| Goodness-of-fit on F2                          | 1.083                                                         |
| Final R indexes [ $I \geq 2\sigma(I)$ ]        | $R_1 = 0.0532, wR_2 = 0.1392$                                 |
| Final R indexes [all data]                     | $R_1 = 0.0588, wR_2 = 0.1448$                                 |
| Largest diff. peak/hole / $e \text{ \AA}^{-3}$ | 0.22/-0.726                                                   |
| Flack parameter                                | -0.010(18)                                                    |

**(R)-2-(6-Methoxy-1H-indol-3-yl)-2-phenyl-2-(tert-butoxycarbonylamino)acetonitrile (6ag)**

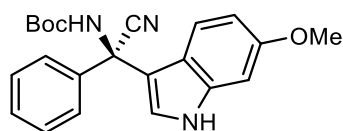

**6ag** (18.5 mg, 98% yield, 92% ee) was obtained by the general procedure using iminonitrile **1a** (11.5 mg, 0.05 mmol), indole **5g** (8.9 mg, 0.06 mmol) and catalyst **3b** (2.5 mg, 2.5  $\mu\text{mol}$ ). The crude **6ag** was purified by silica-gel column chromatography (eluent: Hexane/AcOEt, 70:30).

Pale brown oil. **Optical Rotation:**  $[\alpha]_{\text{D}}^{25.0} = -18.6$  (92% ee,  $c$  0.16,  $\text{CHCl}_3$ );  **$^1\text{H NMR}$**  ( $\text{CDCl}_3$ , 300 MHz)  $\delta$  8.08 (br, 1H), 7.70-7.61 (m, 3H), 7.45-7.42 (m, 3H), 6.88-6.82 (m, 2H), 6.48 (s, 1H), 5.46 (br, 1H), 3.83 (s, 3H), 1.36 (s, 9H);  **$^{13}\text{C NMR}$**  ( $\text{CDCl}_3$ , 125 MHz)  $\delta$  157.1, 153.4, 138.4, 137.8, 128.6, 128.6, 125.9, 123.7, 120.1, 119.3, 118.1, 114.9, 110.9, 95.0, 81.7, 57.1, 55.6, 28.1; **IR** (ATR) 3315, 2978, 2309, 1708, 1630, 1482, 1367, 1159, 889, 694  $\text{cm}^{-1}$ ; **HRMS** (ESI)  $m/z$ :  $[\text{M}+\text{Na}]^+$  calculated for  $\text{C}_{22}\text{H}_{23}\text{N}_3\text{NaO}_2$  400.1632; found 400.1638; **HPLC** (CHIRALPAK IBN-3, Hexane/ $i$ PrOH = 88:12, 1.0 mL/min, 215 nm) 92% ee,  $t_R$  13.9 (major),  $t_R$  16.0 (minor) min.

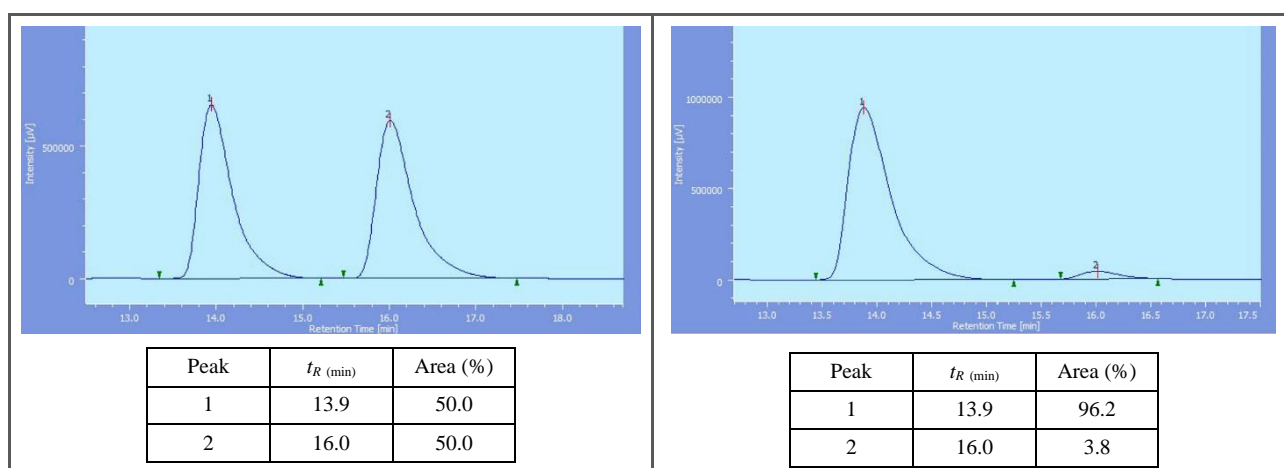

**(R)-2-(3-Methyl-1H-indol-2-yl)-2-phenyl-2-(tert-butoxycarbonylamino)acetonitrile (6ah)**

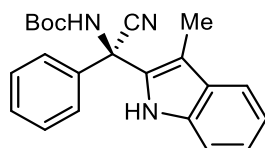

**6ah** (16.1 mg, 89% yield, 81% ee) was obtained by the general procedure using iminonitrile **1a** (11.5 mg, 0.05 mmol), indole **5h** (7.9 mg, 0.06 mmol) and catalyst **3b** (2.5 mg, 2.5  $\mu$ mol). The crude **6ah** was purified by silica-gel column chromatography (eluent: Hexane/AcOEt, 70:30).

Colorless oil. **Optical Rotation:**  $[\alpha]_D^{25.0} = +16.5$  (81% ee,  $c$  0.04,  $\text{CHCl}_3$ );  **$^1\text{H NMR}$**  ( $\text{CDCl}_3$ , 300 MHz)  $\delta$  7.76 (br, 1H), 7.59-7.56 (m, 3H), 7.49-7.44 (m, 3H), 7.24-7.11 (m, 3H), 5.51 (s, 1H), 2.38 (s, 3H), 1.36 (s, 9H);  **$^{13}\text{C NMR}$**  ( $\text{CDCl}_3$ , 125 MHz)  $\delta$  153.0, 136.7, 134.5, 129.7, 129.5, 129.4, 127.9, 126.3, 123.4, 120.0, 119.1, 117.8, 111.1, 110.7, 82.3, 57.3, 28.0, 28.0; **IR** (ATR) 3341, 2978, 2249, 1702, 1452, 1367, 1156, 1051, 908, 730  $\text{cm}^{-1}$ ; **HRMS** (ESI)  $m/z$ :  $[\text{M}+\text{Na}]^+$  calculated for  $\text{C}_{22}\text{H}_{23}\text{N}_3\text{NaO}_2$  384.1682; found 384.1683; **HPLC** (CHIRALPAK IBN-3, Hexane/ $i$ PrOH = 95:5, 1.0 mL/min, 215 nm) 81% ee,  $t_R$  13.9 (major),  $t_R$  16.0 (minor) min.

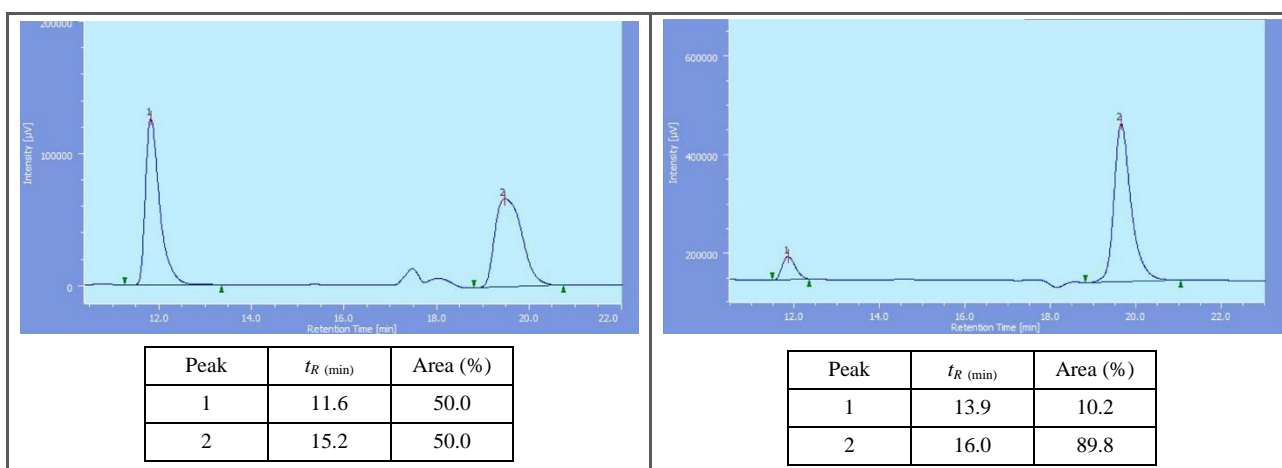

**(R)-2-(3-Methyl-1H-indol-2-yl)-2-(4-bromophenyl)-2-(tert-butoxycarbonylamino)acetonitrile (6ai)**

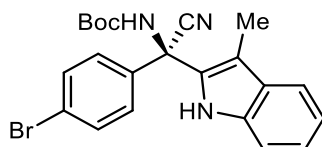

**6ai** (18.3 mg, 83% yield, 85% ee) was obtained by the general procedure using iminonitrile **1d** (15.5 mg, 0.05 mmol), 2-methylindole **5i** (7.9 mg, 0.06 mmol) and catalyst **3b** (2.5 mg, 2.5  $\mu$ mol). The crude **6ai** was purified by silica-gel column chromatography (eluent: Hexane/AcOEt, 80:20).

White solid. **Optical Rotation:**  $[\alpha]_D^{25.0} = -180.05$  (83% ee,  $c$  0.08,  $\text{CHCl}_3$ );  **$^1\text{H NMR}$**  ( $\text{CDCl}_3$ , 300 MHz)  $\delta$  7.76 (br, 1H), 7.62-7.55 (m, 3H), 7.46-7.43 (m, 2H), 7.26-7.11 (m, 3H), 5.50 (br, 1H), 2.36 (s, 3H), 1.37 (s, 9H);  **$^{13}\text{C NMR}$**  ( $\text{CDCl}_3$ , 125 MHz)  $\delta$  153.1, 135.9, 134.6, 132.5, 129.4, 128.0, 127.3, 123.9, 123.6, 120.2, 119.2, 117.5, 111.2, 111.0, 82.7, 56.99, 28.1, 9.2; **IR** (ATR) 3724, 3047, 2298, 1765, 1504, 1428, 1372, 1206, 1054, 930, 797  $\text{cm}^{-1}$ ; **HRMS** (ESI)  $m/z$ :  $[\text{M}+\text{Na}]^+$  calculated for  $\text{C}_{22}\text{H}_{22}\text{N}_3\text{NaO}_2$  462.0788; found 462.0776; **HPLC** (CHIRALPAK IK, Hexane/ $i$ PrOH = 95:5, 1.0 mL/min, 215 nm) 85% ee,  $t_R$  8.8 (major),  $t_R$  9.8 (minor) min.

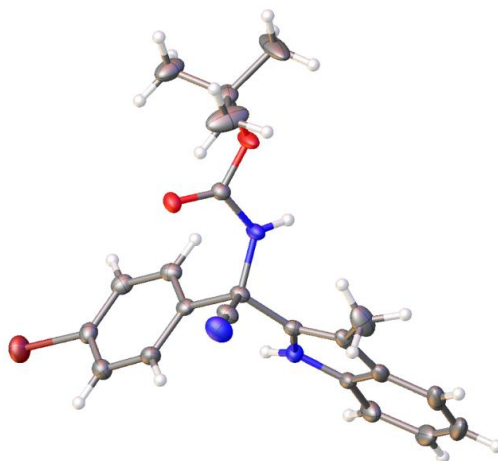

|                                             |                                                                  |
|---------------------------------------------|------------------------------------------------------------------|
| Empirical Formula                           | C <sub>22</sub> H <sub>22</sub> N <sub>3</sub> O <sub>2</sub> Br |
| Formula weight                              | 440.33                                                           |
| Temperature/K                               | 103(2)                                                           |
| Crystal system                              | orthorhombic                                                     |
| Space group                                 | P2 <sub>1</sub> 2 <sub>1</sub> 2 <sub>1</sub>                    |
| a/Å                                         | 9.35120(10)                                                      |
| b/Å                                         | 11.21500(10)                                                     |
| c/Å                                         | 19.5965(2)                                                       |
| α/°                                         | 90                                                               |
| β/°                                         | 90                                                               |
| γ/°                                         | 90                                                               |
| Volume/Å <sup>3</sup>                       | 2055.16(4)                                                       |
| Z                                           | 2                                                                |
| ρ <sub>calc</sub> /cm <sup>3</sup>          | 1.423                                                            |
| μ/mm <sup>-1</sup>                          | 2.904                                                            |
| F(000)                                      | 904.0                                                            |
| Crystal size/mm <sup>3</sup>                | 0.156 x 0.129 x 0.081                                            |
| Radiation                                   | CuKα (λ = 1.54184)                                               |
| 2θ range for data collection/°              | 9.026 to 151.508                                                 |
| Index ranges                                | -11 ≤ h ≤ 11, -12 ≤ k ≤ 14, -24 ≤ l ≤ 24                         |
| Reflections collected                       | 23219                                                            |
| Independent reflections                     | 4135 [R <sub>int</sub> = 0.0174, R <sub>sigma</sub> = 0.0112]    |
| Data/restraints/parameters                  | 4135/0/257                                                       |
| Goodness-of-fit on F <sup>2</sup>           | 1.066                                                            |
| Final R indexes [I ≥ 2σ (I)]                | R <sub>1</sub> = 0.0217, wR <sub>2</sub> = 0.0547                |
| Final R indexes [all data]                  | R <sub>1</sub> = 0.0217, wR <sub>2</sub> = 0.0547                |
| Largest diff. peak/hole / e Å <sup>-3</sup> | 0.25/-0.38                                                       |
| Flack parameter                             | -0.023(3)                                                        |

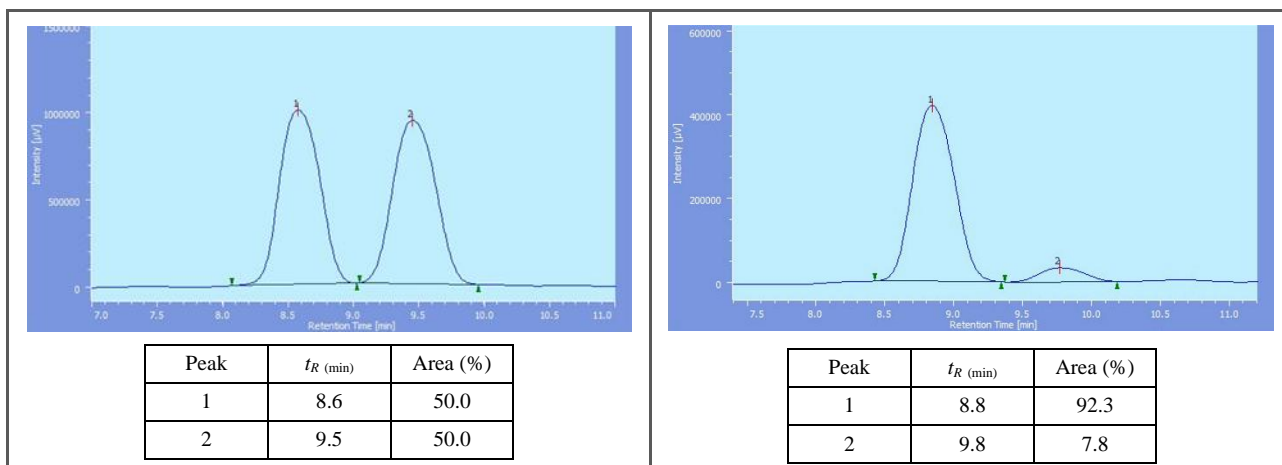

**(*R*)-2-(1*H*-Indazol-3-yl)-2-(4-bromophenyl)-phenyl-2-(*tert*-butoxycarbonylamino)acetonitrile (**6ak**)**

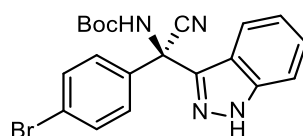

**6ak** (16.0 mg, 75% yield, 92% ee) was obtained by the general procedure using iminonitrile **1a** (15.5 mg, 0.05 mmol), indazole **5k** (7.1 mg, 0.06 mmol) and catalyst **3a** (1.9 mg, 2.5  $\mu$ mol). The crude **6ak** was purified by silica-gel column chromatography (eluent: Hexane/AcOEt, 80:20).

White solid. **Optical Rotation:**  $[\alpha]_D^{25.0} = 21.0$  (92% ee,  $c$  0.59,  $\text{CHCl}_3$ );  **$^1\text{H NMR}$**  ( $\text{CDCl}_3$ , 300 MHz)  $\delta$  8.15 (s, 1H), 7.78-7.75 (m, 1H), 7.55-7.51 (m, 2H), 7.33-7.28 (m, 3H), 7.25-7.15 (m, 2H), 6.72 (s, 1H), 1.37 (s, 9H);  **$^{13}\text{C NMR}$**  ( $\text{CDCl}_3$ , 125 MHz)  $\delta$  152.5, 138.2, 135.5, 135.1, 132.5, 128.0, 127.8, 126.1, 125.0, 122.3, 121.7, 115.4, 111.0, 82.9, 72.1, 28.0; **IR** (ATR) 3301, 2982, 2310, 1867, 1707, 1488, 1370, 1244, 1011, 825  $\text{cm}^{-1}$ ; **HRMS** (ESI)  $m/z$ :  $[\text{M}+\text{Na}]^+$  calculated for  $\text{C}_{20}\text{H}_{19}\text{N}_4\text{NaO}_2$  449.0584; found 449.0589; **HPLC** (CHIRALPAK IBN-3, Hexane/ $^i$ PrOH = 98:2, 1.0 mL/min, 215 nm) 92% ee,  $t_R$  17.4 (minor),  $t_R$  20.5 (major) min.

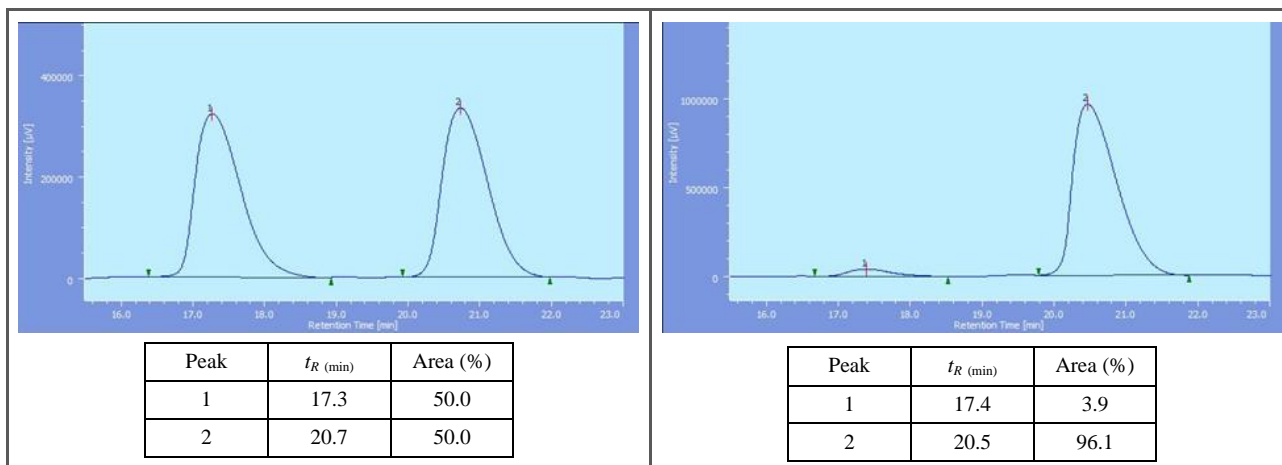

**(*R*)-2-(6-Hydroxybenzo[*d*][1,3]dioxol-5-yl)-2-(4-bromophenyl)-2-(*tert*-butoxycarbonylamino)acetonitrile (**6al**)**

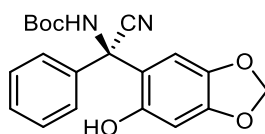

**6al** (16.9 mg, 92% yield, 29% ee) was obtained by the general procedure using iminonitrile **1a** (11.5 mg, 0.05 mmol),

sesamol **5l** (8.3 mg, 0.06 mmol) and catalyst **3b** (2.5 mg, 2.5  $\mu$ mol). The crude **6al** was purified by silica-gel column chromatography (eluent: Hexane/AcOEt, 80:20).

Colorless oil. **Optical Rotation**:  $[\alpha]_D^{25.0} = -10.0$  (29% ee,  $c$  0.43,  $\text{CHCl}_3$ );  **$^1\text{H NMR}$**  ( $\text{CDCl}_3$ , 300 MHz)  $\delta$  7.43-7.31 (m, 5H), 6.80 (s, 1H), 6.61 (s, 1H), 5.97 (dd,  $J = 4.1, 1.4$  Hz, 2H), 5.61 (s, 1H), 1.35 (s, 9H);  **$^{13}\text{C NMR}$**  ( $\text{CDCl}_3$ , 125 MHz)  $\delta$  154.0, 149.4, 148.6, 144.1, 140.0, 129.2, 129.1, 128.7, 125.7, 121.0, 104.6, 101.7, 93.8, 81.0, 65.3, 28.2; **IR** (ATR) 3361, 2980, 2774, 2261, 1708, 1477, 1288, 1157, 1028, 936, 750  $\text{cm}^{-1}$ ; **HRMS** (ESI)  $m/z$ :  $[\text{M}+\text{Na}]^+$  calculated for  $\text{C}_{20}\text{H}_{20}\text{N}_2\text{NaO}_5$  391.1264; found 391.1269; **HPLC** (CHIRALPAK IH-3, Hexane/ $i$ PrOH = 90:10, 1.0 mL/min, 215 nm) 29% ee,  $t_R$  20.3 (major),  $t_R$  23.3 (minor) min.

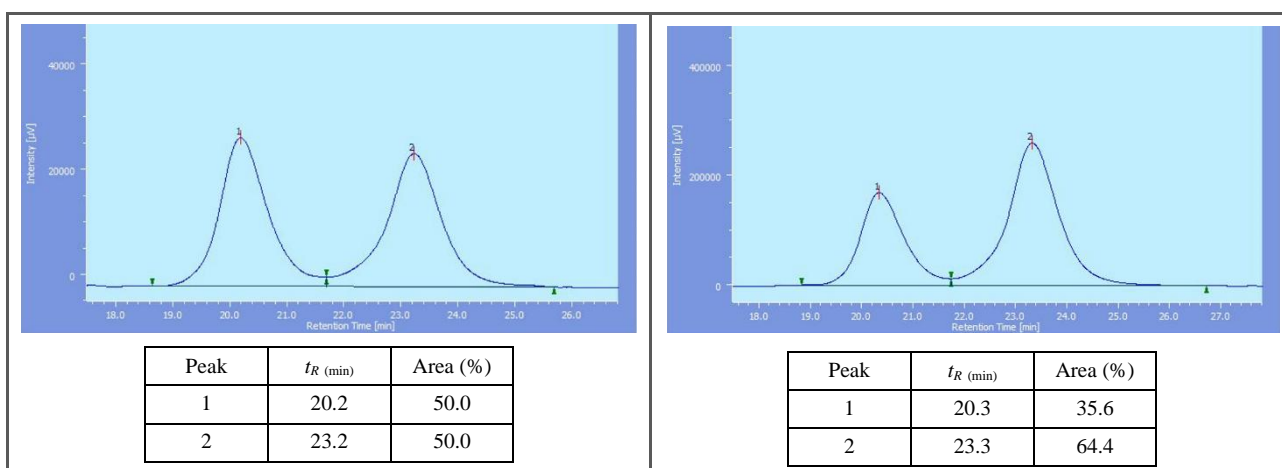

**(R)-2-(1-Hydroxynaphthalen-2-yl)-2-phenyl-2-(tert-butoxycarbonylamino)acetonitrile (6am)**

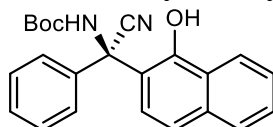

**6am** (15.7 mg, 84% yield, 50% ee) was obtained by the general procedure using iminonitrile **1a** (11.5 mg, 0.05 mmol), 1-naphthol **5m** (8.7 mg, 0.06 mmol) and catalyst **3b** (2.5 mg, 2.5  $\mu$ mol). The crude **6am** was purified by silica-gel column chromatography (eluent: Hexane/AcOEt, 80:20).

Yellow oil. **Optical Rotation**:  $[\alpha]_D^{25.0} = -26.1$  (50% ee,  $c$  0.17,  $\text{CHCl}_3$ );  **$^1\text{H NMR}$**  ( $\text{CDCl}_3$ , 300 MHz)  $\delta$  8.08 (br, 1H), 7.87 (d,  $J = 7.4$  Hz, 2H), 7.65-7.26 (m, 10H), 5.66 (br, 1H), 1.25 (s, 9H);  **$^{13}\text{C NMR}$**  ( $\text{CDCl}_3$ , 125 MHz)  $\delta$  171.2, 154.1, 150.6, 140.0, 134.7, 129.1, 128.7, 128.2, 127.0, 126.5, 126.3, 125.3, 123.8, 123.3, 121.5, 119.8, 80.8, 65.5, 28.1; **IR** (ATR) 3421, 2978, 2317, 1701, 1602, 1507, 1368, 1099, 969, 823, 774  $\text{cm}^{-1}$ ; **HRMS** (ESI)  $m/z$ :  $[\text{M}+\text{Na}]^+$  calculated for  $\text{C}_{23}\text{H}_{22}\text{N}_2\text{NaO}_3$  397.1523; found 397.1524; **HPLC** (CHIRALPAK IK, Hexane/ $i$ PrOH = 95:5, 1.0 mL/min, 215 nm) 50% ee,  $t_R$  27.0 (major),  $t_R$  28.3 (minor) min.

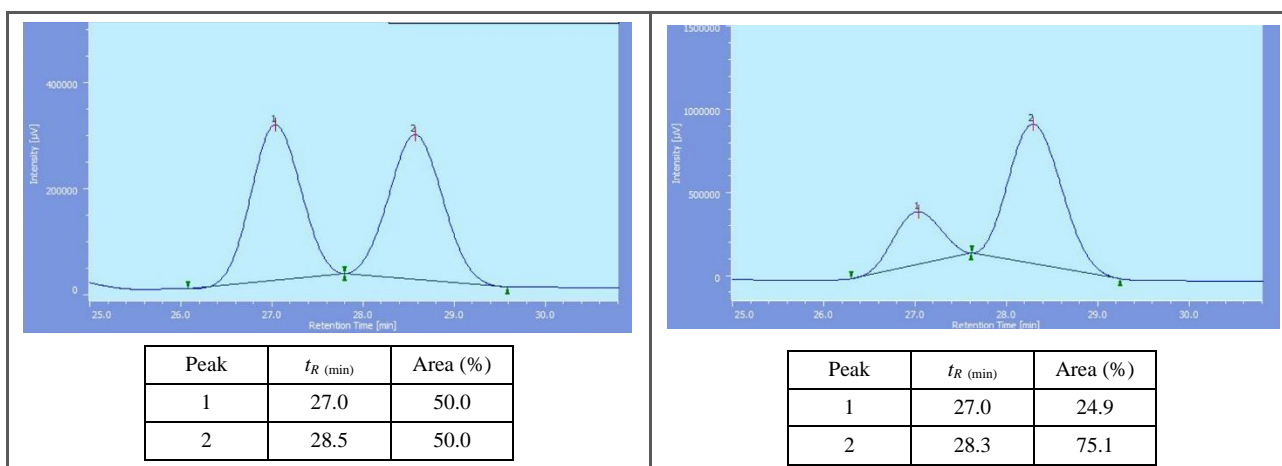

**(R)-2-(1H-Indol-3-yl)-2-phenyl-2-(tert-butoxycarbonylamino)acetamide (7)**

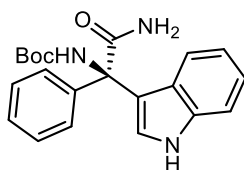

In a round bottomed flask,  $\text{InCl}_3$  (4.6 mg, 30 mol%) and acetaldoxime (17.0  $\mu\text{L}$ , 5.0 equiv.) were added to a solution of **6aa** (17.4 mg, 0.05 mmol) in benzene. The mixture was stirred at 0 °C for 10 min and warmed up to room temperature. After stirring 48 h, the crude mixture was concentrated under reduced pressure, the resulting mixture was purified by silica-gel column chromatography (eluent: Hexane/AcOEt, 60:40).

Colorless oil. **Optical Rotation:**  $[\alpha]_{\text{D}}^{25.0} = -248.2$  (95% ee,  $c$  0.057,  $\text{CHCl}_3$ );  **$^1\text{H}$  NMR** ( $\text{CDCl}_3$ , 300 MHz)  $\delta$  8.63 (br, 1H), 7.59-7.56 (m, 2H), 7.43-7.35 (m, 4H), 7.05-7.01 (m, 3H), 6.67 (br, 1H), 6.58 (br, 1H), 6.39 (m, 1H), 5.67 (br, 1H), 1.35 (s, 9H);  **$^{13}\text{C}$  NMR** ( $\text{CDCl}_3$ , 125 MHz)  $\delta$  174.3, 154.9, 140.0, 136.8, 128.4, 128.0, 127.3, 126.5, 125.1, 122.2, 119.8, 119.7, 115.7, 111.7, 80.0, 66.1, 28.3; **IR** (ATR) 3372, 2960, 2924, 2355, 1692, 1462, 1261, 1165, 1033, 804  $\text{cm}^{-1}$ ; **HRMS** (ESI)  $m/z$ :  $[\text{M}+\text{Na}]^+$  calculated for  $\text{C}_{21}\text{H}_{23}\text{N}_3\text{NaO}_3$  388.1632; found 395.1632; **HPLC** (CHIRALPAK IH, Hexane/ $i$ PrOH = 85:15, 1.0 mL/min, 215 nm) 94% ee,  $t_R$  19.9 (major),  $t_R$  28.9 (minor) min.

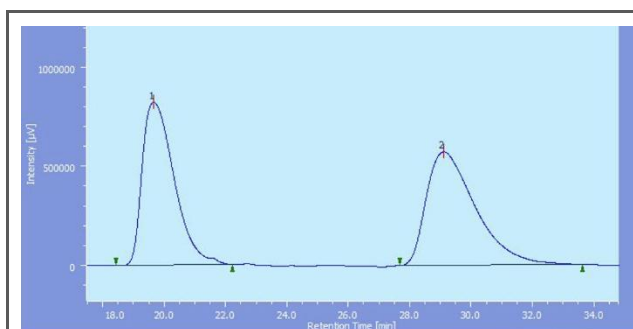

| Peak | $t_R$ (min) | Area (%) |
|------|-------------|----------|
| 1    | 19.7        | 50.0     |
| 2    | 29.1        | 50.0     |

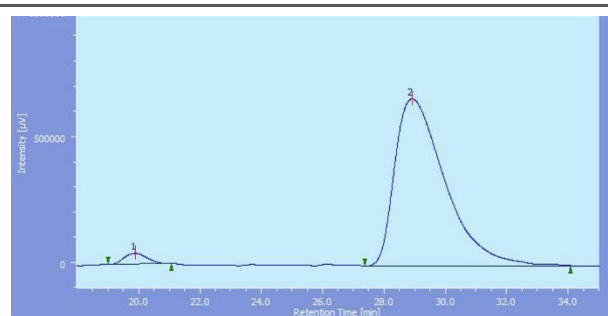

| Peak | $t_R$ (min) | Area (%) |
|------|-------------|----------|
| 1    | 19.9        | 97.3     |
| 2    | 28.9        | 2.7      |

### Asymmetric Friedel-Crafts Reaction of 1a with 2a with low catalyst loading

The reactions were performed using **1a**, **2a**, and catalyst **3a** in toluene. Most of these experiments were following general procedures.

Catalyst addition:

The reaction with 100 ppm of catalyst: 10.0  $\mu\text{L}$  of the solution of 1.3 mg of catalyst **3a** in 0.5 mL Toluene.

The reaction with 50 ppb of catalyst: 5.0  $\mu\text{L}$  of the solution of 1.3 mg of catalyst **3a** in 50 mL Toluene.

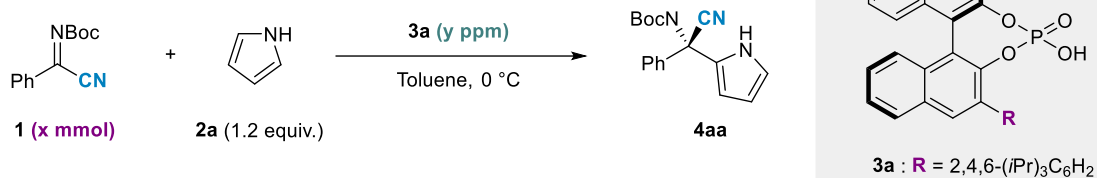

| x mmol | y ppm           | time | Yield (%) | Ee (%) | TON        | TOF (h <sup>-1</sup> ) |
|--------|-----------------|------|-----------|--------|------------|------------------------|
| 0.25   | 100             | 10 h | 90        | 97     | 9,000      | 900                    |
| 2.5    | 0.05 (= 50 ppb) | 7 d  | 54        | 94     | 10,800,000 | 64,286                 |

The TON was calculated by the following equation.

TON = The yield of the product / catalyst equivalent

The TOF was calculated by TON divided by the reaction time (h).

TOF = TON / reaction time (h)

## DFT calculations

The calculation was performed using Gaussian 09 revision E.01.4) Geometry optimizations were performed using B3LYP functional with 6-31G(d,p) basis set for all the atoms under the conditions of tight convergence criteria (opt=tight) with an ultrafine integration grid (int=(grid=ultrafine)). After optimization of structures, frequency calculations were performed at the same level of the theory to confirm that the obtained structures were either a stationary point (no imaginary frequencies) or a transition state (one imaginary frequency). Single point energy calculations for the optimized geometry were performed using M06-2X functional with 6-311G+(d,p) basis set for all the atoms in CPCM solvation model (toluene or CH<sub>2</sub>Cl<sub>2</sub>). 3D Model were visualized by CYLview5) and GaussView. NBO analysis was carried out using NBO version 3.1.6)

## Calculated Structures

Pyr-(S)-O-TS

M06-2X/6-311G+(d,p)/CPCM(toluene)//B3LYP/6-31G(d)

single point energy: -3555.54120093 a.u.

number of imaginary frequencies: 1 (273.6056i)

|   |          |         |          |
|---|----------|---------|----------|
| C | -2.69654 | 1.31305 | 0.29950  |
| C | -3.83786 | 0.55371 | 0.68858  |
| C | -4.62267 | 1.07358 | 1.69806  |
| C | -4.29022 | 2.27015 | 2.38008  |
| C | -3.15353 | 3.02729 | 1.95259  |
| C | -2.39635 | 2.56398 | 0.81966  |
| C | -5.06072 | 2.72679 | 3.48344  |
| C | -4.70969 | 3.86749 | 4.16675  |
| C | -3.56291 | 4.59636 | 3.77282  |
| C | -2.80804 | 4.19092 | 2.69420  |
| C | -1.32859 | 3.40644 | 0.20758  |
| C | -1.60627 | 4.74192 | -0.25322 |
| C | -0.51872 | 5.55222 | -0.71242 |
| C | 0.78885  | 5.00758 | -0.74676 |
| C | 1.05290  | 3.69352 | -0.41728 |
| C | -0.04491 | 2.91111 | 0.04163  |
| C | -2.91743 | 5.29080 | -0.31044 |
| C | -3.13171 | 6.57553 | -0.75873 |
| C | -2.04897 | 7.38774 | -1.16997 |
| C | -0.77081 | 6.88096 | -1.14940 |
| O | 0.21539  | 1.59235 | 0.42396  |
| P | -0.36253 | 0.37303 | -0.47811 |
| O | -1.91086 | 0.79887 | -0.73322 |
| H | -5.51956 | 0.53780 | 1.99612  |
| H | -5.92828 | 2.14528 | 3.78602  |



|   |          |          |          |
|---|----------|----------|----------|
| H | -5.30090 | 4.20348  | 5.01413  |
| H | -3.27140 | 5.48303  | 4.32923  |
| H | -1.92793 | 4.75672  | 2.41148  |
| H | 1.60806  | 5.64126  | -1.07575 |
| H | -3.76121 | 4.68168  | -0.00902 |
| H | -4.14452 | 6.96684  | -0.80178 |
| H | -2.23187 | 8.40201  | -1.51384 |
| H | 0.06992  | 7.48419  | -1.48339 |
| C | -4.23796 | -0.72616 | 0.01343  |
| C | -4.18926 | -1.95202 | 0.72373  |
| C | -4.76134 | -0.69550 | -1.30069 |
| C | -4.68811 | -3.10749 | 0.11192  |
| C | -5.23718 | -1.88431 | -1.86509 |
| C | -5.22370 | -3.09847 | -1.17887 |
| H | -4.66373 | -4.04206 | 0.66665  |
| H | -5.64999 | -1.85973 | -2.87128 |
| C | 2.44694  | 3.15268  | -0.53738 |
| C | 3.20877  | 2.88724  | 0.62530  |
| C | 3.03174  | 2.98305  | -1.81639 |
| C | 4.53538  | 2.46818  | 0.48142  |
| C | 4.36846  | 2.57397  | -1.89869 |
| C | 5.14379  | 2.31474  | -0.76735 |
| H | 5.12583  | 2.27174  | 1.37451  |
| H | 4.81142  | 2.45008  | -2.88222 |
| O | -0.32272 | -0.77717 | 0.60508  |
| C | -3.62504 | -2.06113 | 2.14196  |
| C | -2.54058 | -3.14825 | 2.26081  |
| C | -4.73974 | -2.30564 | 3.17864  |
| H | -3.14565 | -1.10946 | 2.38810  |
| H | -1.74836 | -2.99571 | 1.52394  |
| H | -2.08902 | -3.12056 | 3.25979  |
| H | -2.95180 | -4.15441 | 2.11530  |
| H | -5.49439 | -1.51220 | 3.15858  |
| H | -5.25438 | -3.25528 | 2.98885  |
| H | -4.32092 | -2.34823 | 4.19146  |
| C | -5.79887 | -4.35597 | -1.81804 |
| C | -7.04429 | -4.85757 | -1.06197 |
| C | -4.75035 | -5.47469 | -1.95530 |
| H | -6.11959 | -4.08246 | -2.83259 |

|   |          |          |          |
|---|----------|----------|----------|
| H | -7.80900 | -4.07585 | -0.99745 |
| H | -7.48408 | -5.72482 | -1.56944 |
| H | -6.79165 | -5.16232 | -0.03927 |
| H | -3.87698 | -5.13007 | -2.51958 |
| H | -4.40137 | -5.81630 | -0.97356 |
| H | -5.17528 | -6.34096 | -2.47679 |
| C | -4.87691 | 0.59097  | -2.11785 |
| C | -6.35105 | 0.95308  | -2.38752 |
| C | -4.07332 | 0.51436  | -3.42996 |
| H | -4.45414 | 1.41076  | -1.53119 |
| H | -6.91309 | 1.05300  | -1.45204 |
| H | -6.41801 | 1.90461  | -2.92881 |
| H | -6.84897 | 0.18867  | -2.99556 |
| H | -3.01909 | 0.29941  | -3.23185 |
| H | -4.46211 | -0.26465 | -4.09662 |
| H | -4.13291 | 1.46873  | -3.96688 |
| C | 2.27166  | 3.23574  | -3.12062 |
| C | 2.24542  | 1.99417  | -4.03221 |
| C | 2.84114  | 4.45479  | -3.87387 |
| H | 1.23220  | 3.46467  | -2.87059 |
| H | 1.77061  | 1.15085  | -3.52506 |
| H | 1.67245  | 2.21136  | -4.94213 |
| H | 3.25251  | 1.69028  | -4.34007 |
| H | 2.82284  | 5.35872  | -3.25412 |
| H | 3.88058  | 4.28541  | -4.17936 |
| H | 2.25600  | 4.65328  | -4.77997 |
| C | 2.65498  | 3.09134  | 2.03519  |
| C | 3.40305  | 4.21937  | 2.77336  |
| C | 2.66563  | 1.78837  | 2.85632  |
| H | 1.61132  | 3.40722  | 1.95181  |
| H | 3.36441  | 5.15675  | 2.20725  |
| H | 2.95413  | 4.39805  | 3.75819  |
| H | 4.45882  | 3.96785  | 2.92868  |
| H | 2.08597  | 1.00792  | 2.35401  |
| H | 3.68530  | 1.41442  | 3.00719  |
| H | 2.22338  | 1.95994  | 3.84584  |
| C | 6.61854  | 1.93821  | -0.85435 |
| C | 7.49444  | 3.20653  | -0.92431 |
| C | 6.95076  | 0.98211  | -2.01153 |

|   |          |          |          |
|---|----------|----------|----------|
| H | 6.86899  | 1.42058  | 0.08273  |
| H | 7.30561  | 3.86878  | -0.07209 |
| H | 8.55959  | 2.94427  | -0.92598 |
| H | 7.28463  | 3.77291  | -1.83988 |
| H | 6.31358  | 0.09204  | -1.99620 |
| H | 6.82586  | 1.46860  | -2.98629 |
| H | 7.99690  | 0.66017  | -1.94479 |
| H | -0.07506 | -1.67741 | 0.23939  |
| N | 1.32182  | -4.10256 | -1.39020 |
| C | 2.43459  | -4.66609 | -1.69206 |
| C | 2.47808  | -5.48898 | -2.92212 |
| C | 3.58895  | -6.29470 | -3.22531 |
| C | 1.39058  | -5.44204 | -3.81427 |
| C | 3.61488  | -7.03292 | -4.40632 |
| H | 4.43024  | -6.34035 | -2.54109 |
| C | 1.42406  | -6.18111 | -4.99025 |
| H | 0.53194  | -4.82974 | -3.56230 |
| C | 2.53590  | -6.97676 | -5.28999 |
| H | 4.47761  | -7.65162 | -4.63492 |
| H | 0.58050  | -6.14305 | -5.67297 |
| H | 2.55733  | -7.55454 | -6.21000 |
| C | 0.94163  | -3.76142 | -0.08967 |
| O | -0.15874 | -3.25586 | 0.11990  |
| C | 3.26386  | -5.58143 | -0.91194 |
| N | 3.99470  | -6.29011 | -0.35224 |
| O | 0.30278  | 0.10865  | -1.77575 |
| H | 1.88266  | -0.93678 | -2.04519 |
| N | 2.71054  | -1.53006 | -2.09196 |
| C | 3.52320  | -1.68177 | -3.18715 |
| C | 3.00647  | -2.86815 | -1.13129 |
| C | 4.51546  | -2.58701 | -2.86499 |
| H | 3.33491  | -1.12854 | -4.09616 |
| C | 4.28856  | -2.99557 | -1.51818 |
| H | 2.66952  | -2.32770 | -0.10997 |
| H | 5.31511  | -2.91474 | -3.51586 |
| H | 4.88232  | -3.69525 | -0.94473 |
| O | 1.88738  | -3.95825 | 0.81450  |
| C | 1.60094  | -4.35536 | 2.22612  |
| C | 0.87384  | -3.20858 | 2.92786  |

|   |          |          |         |
|---|----------|----------|---------|
| H | 1.44983  | -2.28040 | 2.84580 |
| H | -0.12175 | -3.04819 | 2.51005 |
| H | 0.76732  | -3.44892 | 3.99132 |
| C | 3.00887  | -4.55506 | 2.78797 |
| H | 2.94696  | -4.85674 | 3.83862 |
| H | 3.54091  | -5.33115 | 2.23003 |
| H | 3.58608  | -3.62692 | 2.72753 |
| C | 0.80770  | -5.66253 | 2.23918 |
| H | -0.21059 | -5.51842 | 1.87441 |
| H | 1.29883  | -6.41572 | 1.61537 |
| H | 0.76134  | -6.03984 | 3.26681 |

Pyr-(R)-O-TS

M06-2X/6-311G+(d,p)/CPCM(toluene)//B3LYP/6-31G(d)

single point energy: -3555.53667068 a.u.

number of imaginary frequencies: 1 (209.8161i)

|   |          |         |          |
|---|----------|---------|----------|
| C | -2.69654 | 1.31305 | 0.29950  |
| C | -3.83786 | 0.55371 | 0.68858  |
| C | -4.62267 | 1.07358 | 1.69806  |
| C | -4.29022 | 2.27015 | 2.38008  |
| C | -3.15353 | 3.02729 | 1.95259  |
| C | -2.39635 | 2.56398 | 0.81966  |
| C | -5.06072 | 2.72679 | 3.48344  |
| C | -4.70969 | 3.86749 | 4.16675  |
| C | -3.56291 | 4.59636 | 3.77282  |
| C | -2.80804 | 4.19092 | 2.69420  |
| C | -1.32859 | 3.40644 | 0.20758  |
| C | -1.60627 | 4.74192 | -0.25322 |
| C | -0.51872 | 5.55222 | -0.71242 |
| C | 0.78885  | 5.00758 | -0.74676 |
| C | 1.05290  | 3.69352 | -0.41728 |
| C | -0.04491 | 2.91111 | 0.04163  |
| C | -2.91743 | 5.29080 | -0.31044 |
| C | -3.13171 | 6.57553 | -0.75873 |
| C | -2.04897 | 7.38774 | -1.16997 |
| C | -0.77081 | 6.88096 | -1.14940 |
| O | 0.21539  | 1.59235 | 0.42396  |
| P | -0.36253 | 0.37303 | -0.47811 |

|   |          |          |          |
|---|----------|----------|----------|
| O | -1.91086 | 0.79887  | -0.73322 |
| H | -5.51956 | 0.53780  | 1.99612  |
| H | -5.92828 | 2.14528  | 3.78602  |
| H | -5.30090 | 4.20348  | 5.01413  |
| H | -3.27140 | 5.48303  | 4.32923  |
| H | -1.92793 | 4.75672  | 2.41148  |
| H | 1.60806  | 5.64126  | -1.07575 |
| H | -3.76121 | 4.68168  | -0.00902 |
| H | -4.14452 | 6.96684  | -0.80178 |
| H | -2.23187 | 8.40201  | -1.51384 |
| H | 0.06992  | 7.48419  | -1.48339 |
| C | -4.23796 | -0.72616 | 0.01343  |
| C | -4.18926 | -1.95202 | 0.72373  |
| C | -4.76134 | -0.69550 | -1.30069 |
| C | -4.68811 | -3.10749 | 0.11192  |
| C | -5.23718 | -1.88431 | -1.86509 |
| C | -5.22370 | -3.09847 | -1.17887 |
| H | -4.66373 | -4.04206 | 0.66665  |
| H | -5.64999 | -1.85973 | -2.87128 |
| C | 2.44694  | 3.15268  | -0.53738 |
| C | 3.20877  | 2.88724  | 0.62530  |
| C | 3.03174  | 2.98305  | -1.81639 |
| C | 4.53538  | 2.46818  | 0.48142  |
| C | 4.36846  | 2.57397  | -1.89869 |
| C | 5.14379  | 2.31474  | -0.76735 |
| H | 5.12583  | 2.27174  | 1.37451  |
| H | 4.81142  | 2.45008  | -2.88222 |
| O | -0.32272 | -0.77717 | 0.60508  |
| C | -3.62504 | -2.06113 | 2.14196  |
| C | -2.54058 | -3.14825 | 2.26081  |
| C | -4.73974 | -2.30564 | 3.17864  |
| H | -3.14565 | -1.10946 | 2.38810  |
| H | -1.74836 | -2.99571 | 1.52394  |
| H | -2.08902 | -3.12056 | 3.25979  |
| H | -2.95180 | -4.15441 | 2.11530  |
| H | -5.49439 | -1.51220 | 3.15858  |
| H | -5.25438 | -3.25528 | 2.98885  |
| H | -4.32092 | -2.34823 | 4.19146  |
| C | -5.79887 | -4.35597 | -1.81804 |

|   |          |          |          |
|---|----------|----------|----------|
| C | -7.04429 | -4.85757 | -1.06197 |
| C | -4.75035 | -5.47469 | -1.95530 |
| H | -6.11959 | -4.08246 | -2.83259 |
| H | -7.80900 | -4.07585 | -0.99745 |
| H | -7.48408 | -5.72482 | -1.56944 |
| H | -6.79165 | -5.16232 | -0.03927 |
| H | -3.87698 | -5.13007 | -2.51958 |
| H | -4.40137 | -5.81630 | -0.97356 |
| H | -5.17528 | -6.34096 | -2.47679 |
| C | -4.87691 | 0.59097  | -2.11785 |
| C | -6.35105 | 0.95308  | -2.38752 |
| C | -4.07332 | 0.51436  | -3.42996 |
| H | -4.45414 | 1.41076  | -1.53119 |
| H | -6.91309 | 1.05300  | -1.45204 |
| H | -6.41801 | 1.90461  | -2.92881 |
| H | -6.84897 | 0.18867  | -2.99556 |
| H | -3.01909 | 0.29941  | -3.23185 |
| H | -4.46211 | -0.26465 | -4.09662 |
| H | -4.13291 | 1.46873  | -3.96688 |
| C | 2.27166  | 3.23574  | -3.12062 |
| C | 2.24542  | 1.99417  | -4.03221 |
| C | 2.84114  | 4.45479  | -3.87387 |
| H | 1.23220  | 3.46467  | -2.87059 |
| H | 1.77061  | 1.15085  | -3.52506 |
| H | 1.67245  | 2.21136  | -4.94213 |
| H | 3.25251  | 1.69028  | -4.34007 |
| H | 2.82284  | 5.35872  | -3.25412 |
| H | 3.88058  | 4.28541  | -4.17936 |
| H | 2.25600  | 4.65328  | -4.77997 |
| C | 2.65498  | 3.09134  | 2.03519  |
| C | 3.40305  | 4.21937  | 2.77336  |
| C | 2.66563  | 1.78837  | 2.85632  |
| H | 1.61132  | 3.40722  | 1.95181  |
| H | 3.36441  | 5.15675  | 2.20725  |
| H | 2.95413  | 4.39805  | 3.75819  |
| H | 4.45882  | 3.96785  | 2.92868  |
| H | 2.08597  | 1.00792  | 2.35401  |
| H | 3.68530  | 1.41442  | 3.00719  |
| H | 2.22338  | 1.95994  | 3.84584  |

|   |          |          |          |
|---|----------|----------|----------|
| C | 6.61854  | 1.93821  | -0.85435 |
| C | 7.49444  | 3.20653  | -0.92431 |
| C | 6.95076  | 0.98211  | -2.01153 |
| H | 6.86899  | 1.42058  | 0.08273  |
| H | 7.30561  | 3.86878  | -0.07209 |
| H | 8.55959  | 2.94427  | -0.92598 |
| H | 7.28463  | 3.77291  | -1.83988 |
| H | 6.31358  | 0.09204  | -1.99620 |
| H | 6.82586  | 1.46860  | -2.98629 |
| H | 7.99690  | 0.66017  | -1.94479 |
| H | -0.22900 | -1.69389 | 0.20969  |
| N | 1.56908  | -3.31100 | 0.75170  |
| C | 2.81887  | -3.59955 | 0.87461  |
| C | 3.43742  | -3.36796 | 2.19518  |
| C | 4.67729  | -3.93834 | 2.53062  |
| C | 2.76314  | -2.56933 | 3.13769  |
| C | 5.22784  | -3.72111 | 3.79163  |
| H | 5.20641  | -4.55209 | 1.80856  |
| C | 3.31872  | -2.35750 | 4.39338  |
| H | 1.81505  | -2.12105 | 2.86230  |
| C | 4.55080  | -2.93345 | 4.72407  |
| H | 6.18529  | -4.16687 | 4.04444  |
| H | 2.79500  | -1.73777 | 5.11504  |
| H | 4.98261  | -2.76389 | 5.70666  |
| C | 0.71983  | -3.88099 | -0.20024 |
| O | -0.16215 | -3.20502 | -0.72513 |
| C | 3.37187  | -4.90519 | 0.52944  |
| N | 3.85952  | -5.94177 | 0.33628  |
| O | 0.49474  | 0.06152  | -1.64621 |
| H | 1.84345  | -1.26960 | -1.67543 |
| N | 2.61508  | -1.93508 | -1.71129 |
| C | 2.75431  | -2.94748 | -2.62700 |
| C | 3.52771  | -2.29331 | -0.46178 |
| C | 3.90871  | -3.64393 | -2.32674 |
| H | 2.02992  | -3.08124 | -3.41769 |
| C | 4.48727  | -3.02211 | -1.18180 |
| H | 3.98239  | -0.94130 | 0.04942  |
| H | 4.29774  | -4.49643 | -2.86748 |
| H | 5.40264  | -3.30982 | -0.68153 |

|   |          |          |          |
|---|----------|----------|----------|
| O | 0.91676  | -5.17592 | -0.38757 |
| C | 0.14071  | -5.98826 | -1.37259 |
| C | -1.31725 | -6.06018 | -0.91940 |
| H | -1.38316 | -6.44079 | 0.10569  |
| H | -1.80233 | -5.08357 | -0.96872 |
| H | -1.86236 | -6.74980 | -1.57310 |
| C | 0.82904  | -7.34957 | -1.26849 |
| H | 0.35158  | -8.05726 | -1.95400 |
| H | 1.88831  | -7.26774 | -1.52910 |
| H | 0.75170  | -7.74676 | -0.25137 |
| C | 0.30301  | -5.38984 | -2.77033 |
| H | -0.21818 | -4.43553 | -2.86198 |
| H | 1.36143  | -5.23323 | -3.00021 |
| H | -0.11221 | -6.08758 | -3.50604 |

Pyr-(S)-N-TS

M06-2X/6-311G+(d,p)/CPCM(toluene)//B3LYP/6-31G(d)

single point energy: -3555.54872570 a.u.

number of imaginary frequencies: 1 (281.3437i)

|   |          |          |          |
|---|----------|----------|----------|
| C | 1.81077  | -2.88771 | 0.03478  |
| C | 3.13229  | -2.82002 | 0.56186  |
| C | 3.55974  | -3.89181 | 1.31891  |
| C | 2.71741  | -4.98853 | 1.62870  |
| C | 1.39978  | -5.04090 | 1.07189  |
| C | 0.97837  | -3.98746 | 0.18591  |
| C | 3.15530  | -6.02983 | 2.49096  |
| C | 2.31919  | -7.06918 | 2.82574  |
| C | 1.00185  | -7.10256 | 2.31147  |
| C | 0.55518  | -6.11917 | 1.45653  |
| C | -0.32181 | -4.06484 | -0.54368 |
| C | -0.63697 | -5.18568 | -1.39014 |
| C | -1.95486 | -5.28771 | -1.94115 |
| C | -2.89788 | -4.26238 | -1.68142 |
| C | -2.57421 | -3.12467 | -0.97052 |
| C | -1.25826 | -3.04734 | -0.42841 |
| C | 0.30910  | -6.19058 | -1.73494 |
| C | -0.03945 | -7.24903 | -2.54467 |
| C | -1.35450 | -7.36787 | -3.05231 |



|   |          |          |          |
|---|----------|----------|----------|
| C | -2.28843 | -6.40254 | -2.75726 |
| O | -0.94605 | -1.93090 | 0.33877  |
| P | 0.18939  | -0.85961 | -0.14281 |
| O | 1.36742  | -1.81129 | -0.73646 |
| H | 4.57373  | -3.88855 | 1.70908  |
| H | 4.16386  | -5.97850 | 2.89416  |
| H | 2.66103  | -7.85561 | 3.49297  |
| H | 0.33270  | -7.90950 | 2.59772  |
| H | -0.46054 | -6.15664 | 1.08093  |
| H | -3.90185 | -4.36389 | -2.08582 |
| H | 1.32334  | -6.11244 | -1.36171 |
| H | 0.70557  | -7.99786 | -2.79960 |
| H | -1.61829 | -8.21219 | -3.68325 |
| H | -3.29785 | -6.46850 | -3.15642 |
| C | 4.07981  | -1.68850 | 0.27902  |
| C | 4.44056  | -0.78535 | 1.30941  |
| C | 4.70449  | -1.59625 | -0.98652 |
| C | 5.44944  | 0.15230  | 1.06233  |
| C | 5.69517  | -0.62611 | -1.18225 |
| C | 6.10046  | 0.24609  | -0.16988 |
| H | 5.73339  | 0.82937  | 1.86263  |
| H | 6.18912  | -0.56628 | -2.15034 |
| C | -3.58197 | -2.02911 | -0.78667 |
| C | -4.16107 | -1.79647 | 0.48266  |
| C | -3.99751 | -1.25800 | -1.90111 |
| C | -5.13420 | -0.79830 | 0.60863  |
| C | -4.97845 | -0.27758 | -1.71703 |
| C | -5.56136 | -0.02676 | -0.47278 |
| H | -5.58582 | -0.62383 | 1.58284  |
| H | -5.29753 | 0.30627  | -2.57724 |
| O | 0.72394  | -0.28602 | 1.19211  |
| C | 3.77888  | -0.80078 | 2.68858  |
| C | 3.29950  | 0.59763  | 3.12430  |
| C | 4.71556  | -1.39825 | 3.75823  |
| H | 2.89085  | -1.43601 | 2.62833  |
| H | 2.66843  | 1.06046  | 2.36164  |
| H | 2.71316  | 0.51870  | 4.04742  |
| H | 4.13979  | 1.27185  | 3.32929  |
| H | 5.01827  | -2.42134 | 3.51039  |

|   |          |          |          |
|---|----------|----------|----------|
| H | 5.62796  | -0.79837 | 3.86277  |
| H | 4.21672  | -1.42160 | 4.73475  |
| C | 7.25343  | 1.21603  | -0.39984 |
| C | 8.54392  | 0.69389  | 0.26411  |
| C | 6.94569  | 2.65150  | 0.06032  |
| H | 7.43418  | 1.24856  | -1.48371 |
| H | 8.79695  | -0.30947 | -0.09579 |
| H | 9.38953  | 1.35888  | 0.04949  |
| H | 8.42721  | 0.63811  | 1.35315  |
| H | 6.03376  | 3.03637  | -0.40701 |
| H | 6.81307  | 2.70723  | 1.14702  |
| H | 7.77436  | 3.32063  | -0.20115 |
| C | 4.37140  | -2.54110 | -2.14110 |
| C | 5.59013  | -3.39158 | -2.54976 |
| C | 3.79039  | -1.78440 | -3.35092 |
| H | 3.60099  | -3.23890 | -1.80145 |
| H | 5.97908  | -3.96035 | -1.69779 |
| H | 5.31348  | -4.10378 | -3.33677 |
| H | 6.40655  | -2.77020 | -2.93638 |
| H | 2.89317  | -1.22607 | -3.06627 |
| H | 4.51685  | -1.07748 | -3.76995 |
| H | 3.51705  | -2.48859 | -4.14629 |
| C | -3.41968 | -1.44590 | -3.30544 |
| C | -2.71233 | -0.17306 | -3.80757 |
| C | -4.49379 | -1.91455 | -4.30584 |
| H | -2.65775 | -2.22772 | -3.25980 |
| H | -1.90717 | 0.10141  | -3.12029 |
| H | -2.27975 | -0.34796 | -4.80108 |
| H | -3.40666 | 0.67215  | -3.89070 |
| H | -4.97060 | -2.84415 | -3.97481 |
| H | -5.28463 | -1.16513 | -4.43030 |
| H | -4.04780 | -2.09465 | -5.29153 |
| C | -3.80759 | -2.62897 | 1.71448  |
| C | -5.00766 | -3.48493 | 2.16759  |
| C | -3.27442 | -1.76451 | 2.87202  |
| H | -3.01012 | -3.32514 | 1.44113  |
| H | -5.35936 | -4.13525 | 1.35864  |
| H | -4.72657 | -4.11969 | 3.01668  |
| H | -5.85134 | -2.85985 | 2.48368  |

|   |          |          |          |
|---|----------|----------|----------|
| H | -2.40261 | -1.18276 | 2.55866  |
| H | -4.03708 | -1.06863 | 3.24212  |
| H | -2.97391 | -2.40090 | 3.71313  |
| C | -6.64915 | 1.02513  | -0.29674 |
| C | -7.95003 | 0.61536  | -1.01461 |
| C | -6.19326 | 2.42539  | -0.74595 |
| H | -6.87136 | 1.08186  | 0.77772  |
| H | -8.30378 | -0.36052 | -0.66466 |
| H | -8.74263 | 1.35171  | -0.83401 |
| H | -7.79847 | 0.54546  | -2.09851 |
| H | -5.28724 | 2.73711  | -0.21413 |
| H | -5.97562 | 2.45055  | -1.82026 |
| H | -6.97621 | 3.16761  | -0.54953 |
| H | -0.07371 | 1.21450  | 1.81524  |
| N | -0.27474 | 2.00993  | 2.18521  |
| C | -0.18305 | 3.20571  | 1.49742  |
| C | 0.98199  | 3.22715  | 0.51202  |
| C | 1.49469  | 4.42898  | 0.00460  |
| C | 1.54171  | 2.01443  | 0.08981  |
| C | 2.54552  | 4.41838  | -0.91152 |
| H | 1.08614  | 5.37873  | 0.33757  |
| C | 2.58732  | 2.00605  | -0.83415 |
| H | 1.16365  | 1.08919  | 0.50721  |
| C | 3.09175  | 3.20629  | -1.33859 |
| H | 2.93980  | 5.35901  | -1.28655 |
| H | 3.01208  | 1.05568  | -1.14472 |
| H | 3.91046  | 3.19876  | -2.05345 |
| C | -0.98583 | 1.86103  | 3.29744  |
| O | -1.09720 | 0.74465  | 3.87664  |
| C | -0.25477 | 4.47369  | 2.26297  |
| N | -0.28028 | 5.49440  | 2.81744  |
| O | -0.24274 | 0.17503  | -1.12685 |
| H | -1.16527 | 1.82428  | -0.82618 |
| N | -1.54185 | 2.79151  | -0.74308 |
| C | -1.51892 | 3.68174  | -1.71642 |
| C | -1.73826 | 3.32234  | 0.48385  |
| C | -2.01183 | 4.93360  | -1.24515 |
| H | -1.14710 | 3.42066  | -2.69915 |
| C | -2.31775 | 4.75843  | 0.08043  |

|   |          |         |          |
|---|----------|---------|----------|
| H | -2.56090 | 2.82973 | 1.08682  |
| H | -2.09941 | 5.83361 | -1.83786 |
| H | -2.71569 | 5.49547 | 0.76590  |
| O | -1.63849 | 2.94976 | 3.77618  |
| C | -2.30614 | 2.98882 | 5.09560  |
| C | -3.49272 | 2.02184 | 5.12338  |
| H | -4.16411 | 2.21242 | 4.27845  |
| H | -3.16195 | 0.98413 | 5.07740  |
| H | -4.06225 | 2.17347 | 6.04779  |
| C | -2.78171 | 4.44199 | 5.17702  |
| H | -3.25489 | 4.62683 | 6.14723  |
| H | -1.94008 | 5.13046 | 5.05710  |
| H | -3.51675 | 4.65513 | 4.39288  |
| C | -1.28116 | 2.68972 | 6.19328  |
| H | -0.90952 | 1.66643 | 6.11594  |
| H | -0.43631 | 3.38321 | 6.12407  |
| H | -1.74961 | 2.81887 | 7.17552  |

Pyr-(R)-N-TS

M06-2X/6-311G+(d,p)/CPCM(toluene)//B3LYP/6-31G(d)

single point energy: -3555.54131537 a.u.

number of imaginary frequencies: 1 (253.0845i)

|   |          |          |          |
|---|----------|----------|----------|
| C | 2.71898  | -1.31708 | 0.15759  |
| C | 3.92556  | -0.68483 | 0.57703  |
| C | 4.80246  | -1.44403 | 1.32508  |
| C | 4.50306  | -2.76414 | 1.74315  |
| C | 3.28954  | -3.38007 | 1.30138  |
| C | 2.42627  | -2.64953 | 0.40990  |
| C | 5.37962  | -3.47944 | 2.60328  |
| C | 5.06030  | -4.74149 | 3.04664  |
| C | 3.84058  | -5.33669 | 2.64788  |
| C | 2.98131  | -4.67763 | 1.79645  |
| C | 1.24731  | -3.30898 | -0.22271 |
| C | 1.39662  | -4.52383 | -0.98101 |
| C | 0.22244  | -5.22472 | -1.40469 |
| C | -1.05261 | -4.68311 | -1.10776 |
| C | -1.20951 | -3.45600 | -0.49571 |
| C | -0.02536 | -2.77287 | -0.09141 |

|   |          |          |          |
|---|----------|----------|----------|
| C | 2.66174  | -5.05287 | -1.35920 |
| C | 2.75701  | -6.22211 | -2.08112 |
| C | 1.59483  | -6.93441 | -2.45983 |
| C | 0.35474  | -6.44033 | -2.12920 |
| O | -0.18780 | -1.56215 | 0.57266  |
| P | 0.37671  | -0.16170 | -0.03648 |
| O | 1.83825  | -0.57378 | -0.62851 |
| H | 5.75205  | -1.00878 | 1.62241  |
| H | 6.30290  | -2.99887 | 2.91797  |
| H | 5.73273  | -5.27605 | 3.71193  |
| H | 3.57553  | -6.32230 | 3.02087  |
| H | 2.04742  | -5.14627 | 1.50964  |
| H | -1.93732 | -5.24234 | -1.40162 |
| H | 3.56261  | -4.51685 | -1.08495 |
| H | 3.73559  | -6.59849 | -2.36649 |
| H | 1.68507  | -7.86024 | -3.02124 |
| H | -0.54896 | -6.96463 | -2.43079 |
| C | 4.30550  | 0.71680  | 0.19201  |
| C | 4.35453  | 1.73738  | 1.17572  |
| C | 4.72936  | 0.99123  | -1.12878 |
| C | 4.86364  | 2.99085  | 0.81936  |
| C | 5.21893  | 2.26765  | -1.42990 |
| C | 5.31275  | 3.27779  | -0.47256 |
| H | 4.91367  | 3.76619  | 1.57894  |
| H | 5.55814  | 2.47618  | -2.44243 |
| C | -2.58256 | -2.90120 | -0.25779 |
| C | -3.09731 | -2.81347 | 1.05758  |
| C | -3.40012 | -2.53770 | -1.35811 |
| C | -4.41330 | -2.37371 | 1.24001  |
| C | -4.70701 | -2.09871 | -1.11421 |
| C | -5.24231 | -2.02044 | 0.17479  |
| H | -4.81545 | -2.32454 | 2.24947  |
| H | -5.33234 | -1.83081 | -1.96258 |
| O | 0.54139  | 0.65509  | 1.27645  |
| C | 3.89044  | 1.51567  | 2.61741  |
| C | 2.96443  | 2.63726  | 3.12677  |
| C | 5.08669  | 1.35405  | 3.57827  |
| H | 3.31123  | 0.58758  | 2.64306  |
| H | 2.13601  | 2.82559  | 2.44021  |

|   |          |          |          |
|---|----------|----------|----------|
| H | 2.54617  | 2.35694  | 4.10081  |
| H | 3.50799  | 3.57948  | 3.26853  |
| H | 5.73401  | 0.51806  | 3.29461  |
| H | 5.70337  | 2.26121  | 3.59076  |
| H | 4.73447  | 1.17476  | 4.60143  |
| C | 5.91718  | 4.63087  | -0.82682 |
| C | 7.25120  | 4.86106  | -0.08989 |
| C | 4.94381  | 5.79636  | -0.57577 |
| H | 6.13720  | 4.61289  | -1.90333 |
| H | 7.96374  | 4.05586  | -0.29984 |
| H | 7.70605  | 5.81002  | -0.39916 |
| H | 7.10205  | 4.89999  | 0.99572  |
| H | 4.01349  | 5.66099  | -1.13717 |
| H | 4.68222  | 5.87886  | 0.48558  |
| H | 5.39444  | 6.74821  | -0.88221 |
| C | 4.71523  | -0.06153 | -2.23669 |
| C | 6.13844  | -0.37719 | -2.73757 |
| C | 3.79306  | 0.34761  | -3.40121 |
| H | 4.31440  | -0.99078 | -1.82286 |
| H | 6.78282  | -0.71091 | -1.91643 |
| H | 6.11087  | -1.17185 | -3.49318 |
| H | 6.60973  | 0.50045  | -3.19527 |
| H | 2.77369  | 0.52534  | -3.04534 |
| H | 4.14848  | 1.26064  | -3.89374 |
| H | 3.75943  | -0.44605 | -4.15766 |
| C | -2.92067 | -2.61322 | -2.81044 |
| C | -2.84514 | -1.22130 | -3.46414 |
| C | -3.78475 | -3.57404 | -3.65007 |
| H | -1.90369 | -3.01162 | -2.81331 |
| H | -2.13772 | -0.58696 | -2.92215 |
| H | -2.50189 | -1.30764 | -4.50273 |
| H | -3.82385 | -0.72581 | -3.47558 |
| H | -3.81894 | -4.57472 | -3.20445 |
| H | -4.81787 | -3.21834 | -3.74105 |
| H | -3.37633 | -3.66756 | -4.66350 |
| C | -2.30199 | -3.24367 | 2.29008  |
| C | -2.93598 | -4.48229 | 2.95481  |
| C | -2.13100 | -2.09570 | 3.30313  |
| H | -1.29979 | -3.53788 | 1.96848  |

|   |          |          |          |
|---|----------|----------|----------|
| H | -3.02071 | -5.31402 | 2.24628  |
| H | -2.32370 | -4.81671 | 3.80092  |
| H | -3.94084 | -4.26552 | 3.33614  |
| H | -1.62738 | -1.23950 | 2.84494  |
| H | -3.09726 | -1.75920 | 3.69874  |
| H | -1.52531 | -2.42982 | 4.15403  |
| C | -6.68845 | -1.60700 | 0.42136  |
| C | -7.67973 | -2.56537 | -0.26606 |
| C | -6.95814 | -0.14742 | 0.01271  |
| H | -6.86159 | -1.67807 | 1.50372  |
| H | -7.50919 | -3.60133 | 0.04630  |
| H | -8.71315 | -2.29809 | -0.01467 |
| H | -7.58233 | -2.52621 | -1.35754 |
| H | -6.32091 | 0.54238  | 0.57644  |
| H | -6.76937 | 0.00625  | -1.05702 |
| H | -8.00274 | 0.12291  | 0.20929  |
| H | -0.14340 | 2.10517  | 0.62007  |
| N | -0.52813 | 3.16534  | 0.21018  |
| C | -1.68725 | 3.88898  | 0.44787  |
| C | -1.95325 | 4.05098  | 1.95607  |
| C | -2.75483 | 5.07990  | 2.46600  |
| C | -1.39545 | 3.11657  | 2.83886  |
| C | -2.99981 | 5.16994  | 3.83790  |
| H | -3.16704 | 5.83173  | 1.79933  |
| C | -1.64664 | 3.20741  | 4.20715  |
| H | -0.75185 | 2.34266  | 2.43662  |
| C | -2.45105 | 4.23188  | 4.71232  |
| H | -3.61367 | 5.98113  | 4.22005  |
| H | -1.20201 | 2.48009  | 4.88127  |
| H | -2.64012 | 4.30393  | 5.78008  |
| C | 0.13302  | 3.19815  | -0.94228 |
| O | 1.17642  | 2.51448  | -1.13733 |
| C | -1.87501 | 5.19509  | -0.23449 |
| N | -2.06772 | 6.25147  | -0.67788 |
| O | -0.41546 | 0.42802  | -1.15591 |
| H | -1.71447 | 1.70241  | -1.35969 |
| N | -2.47354 | 2.29184  | -1.48990 |
| C | -3.34302 | 2.65881  | -2.40610 |
| C | -2.86249 | 2.73646  | -0.14629 |

|   |          |         |          |
|---|----------|---------|----------|
| C | -4.47230 | 3.27717 | -1.78875 |
| H | -3.15562 | 2.48742 | -3.45911 |
| C | -4.24828 | 3.24188 | -0.43901 |
| H | -2.84171 | 1.85268 | 0.52743  |
| H | -5.31725 | 3.70003 | -2.31422 |
| H | -4.88831 | 3.63402 | 0.33924  |
| O | -0.36753 | 3.96962 | -1.93743 |
| C | 0.26256  | 4.09805 | -3.26366 |
| C | 1.66332  | 4.69528 | -3.10252 |
| H | 1.60981  | 5.65078 | -2.56979 |
| H | 2.31591  | 4.01539 | -2.55169 |
| H | 2.10266  | 4.87762 | -4.08964 |
| C | -0.66964 | 5.08643 | -3.97242 |
| H | -0.27418 | 5.32878 | -4.96464 |
| H | -1.66858 | 4.65373 | -4.09967 |
| H | -0.76883 | 6.00865 | -3.39299 |
| C | 0.27776  | 2.75124 | -3.99542 |
| H | 1.01138  | 2.06636 | -3.57122 |
| H | -0.70868 | 2.27712 | -3.94231 |
| H | 0.51631  | 2.91629 | -5.05280 |

Ind-(*R*)-O-TS

M06-2X/6-311G+(d,p)/CPCM(CH<sub>2</sub>Cl<sub>2</sub>)/B3LYP/6-31G(d,p)

single point energy: -4409.48955945 a.u.

number of imaginary frequencies: 1 (292.8480i)

|   |         |          |          |
|---|---------|----------|----------|
| C | 3.22446 | 0.03611  | 0.19568  |
| C | 3.88854 | 1.23828  | 0.57556  |
| C | 4.89612 | 1.12884  | 1.51240  |
| C | 5.22696 | -0.10138 | 2.13281  |
| C | 4.56359 | -1.29830 | 1.71340  |
| C | 3.59639 | -1.22099 | 0.65018  |
| C | 6.19989 | -0.16609 | 3.16679  |
| C | 6.48778 | -1.35628 | 3.79290  |
| C | 5.80435 | -2.53408 | 3.40940  |
| C | 4.87144 | -2.50754 | 2.39625  |
| C | 3.01665 | -2.45354 | 0.04244  |
| C | 3.86097 | -3.48109 | -0.50955 |
| C | 3.25888 | -4.70128 | -0.95533 |



|   |          |          |          |
|---|----------|----------|----------|
| C | 1.85097  | -4.84716 | -0.89065 |
| C | 1.01895  | -3.82738 | -0.47500 |
| C | 1.64365  | -2.62813 | -0.02828 |
| C | 5.26655  | -3.33298 | -0.67043 |
| C | 6.03218  | -4.34651 | -1.20343 |
| C | 5.43918  | -5.56787 | -1.60055 |
| C | 4.07959  | -5.73585 | -1.48105 |
| O | 0.81740  | -1.60564 | 0.44564  |
| P | 0.67615  | -0.23653 | -0.41430 |
| O | 2.21639  | 0.14305  | -0.76423 |
| H | 5.44539  | 2.02078  | 1.80068  |
| H | 6.70267  | 0.75136  | 3.46324  |
| H | 7.22748  | -1.39310 | 4.58786  |
| H | 6.01383  | -3.46897 | 3.92207  |
| H | 4.35161  | -3.41774 | 2.12099  |
| H | 1.40991  | -5.78599 | -1.21466 |
| H | 5.73803  | -2.40118 | -0.38172 |
| H | 7.10238  | -4.20327 | -1.32521 |
| H | 6.05617  | -6.36183 | -2.01208 |
| H | 3.60514  | -6.65949 | -1.80370 |
| C | 3.57385  | 2.57060  | -0.03998 |
| C | 3.00023  | 3.60206  | 0.74524  |
| C | 3.93657  | 2.82919  | -1.38292 |
| C | 2.82336  | 4.86712  | 0.17373  |
| C | 3.72939  | 4.11155  | -1.90287 |
| C | 3.18469  | 5.14893  | -1.14631 |
| H | 2.39425  | 5.65806  | 0.78386  |
| H | 4.01653  | 4.31358  | -2.93238 |
| C | -0.46999 | -4.00946 | -0.49898 |
| C | -1.18931 | -4.15947 | 0.71029  |
| C | -1.14951 | -4.10524 | -1.73889 |
| C | -2.56544 | -4.40449 | 0.65130  |
| C | -2.52520 | -4.36572 | -1.73631 |
| C | -3.25625 | -4.52400 | -0.55738 |
| H | -3.11827 | -4.52944 | 1.58029  |
| H | -3.03732 | -4.44550 | -2.69050 |
| O | 0.16110  | 0.72209  | 0.73155  |
| H | -0.53477 | 1.38580  | 0.44927  |
| N | -3.04705 | 1.76929  | 1.66103  |

|   |          |          |          |
|---|----------|----------|----------|
| C | -4.21610 | 1.24105  | 1.77084  |
| C | -4.62916 | 0.49856  | 2.97882  |
| C | -5.96356 | 0.10128  | 3.16950  |
| C | -3.66770 | 0.19597  | 3.96107  |
| C | -6.33120 | -0.57994 | 4.32768  |
| H | -6.71131 | 0.32782  | 2.41604  |
| C | -4.04240 | -0.48308 | 5.11388  |
| H | -2.63827 | 0.49491  | 3.79772  |
| C | -5.37397 | -0.87192 | 5.30057  |
| H | -7.36472 | -0.88191 | 4.46893  |
| H | -3.29592 | -0.71524 | 5.86755  |
| H | -5.66209 | -1.40425 | 6.20293  |
| C | -2.70294 | 2.71563  | 0.68922  |
| O | -1.60446 | 2.67018  | 0.14103  |
| C | -5.35313 | 2.14702  | 1.64268  |
| N | -6.29241 | 2.82993  | 1.60852  |
| O | -0.11824 | -0.29514 | -1.66455 |
| O | -3.62124 | 3.65190  | 0.52216  |
| C | -3.47632 | 4.78559  | -0.44555 |
| C | -2.29845 | 5.65941  | -0.01506 |
| H | -2.41474 | 5.97766  | 1.02672  |
| H | -1.34741 | 5.13509  | -0.12360 |
| H | -2.27201 | 6.55625  | -0.64352 |
| C | -4.80862 | 5.51472  | -0.27123 |
| H | -4.84745 | 6.37653  | -0.94538 |
| H | -5.64472 | 4.84949  | -0.50637 |
| H | -4.92618 | 5.87321  | 0.75662  |
| C | -3.32507 | 4.23224  | -1.86103 |
| H | -2.38725 | 3.69003  | -1.98668 |
| H | -4.15206 | 3.56113  | -2.11103 |
| H | -3.33900 | 5.06697  | -2.57080 |
| C | -3.97926 | 0.12724  | -1.46677 |
| C | -5.10780 | -0.07735 | -0.61961 |
| C | -6.33676 | 0.50915  | -0.97418 |
| C | -6.41503 | 1.26189  | -2.13945 |
| C | -5.28609 | 1.44497  | -2.96740 |
| C | -4.05651 | 0.88336  | -2.64314 |
| C | -3.32394 | -1.15432 | 0.25215  |
| C | -4.50515 | -0.40541 | 0.76679  |

|   |          |          |          |
|---|----------|----------|----------|
| H | -7.21236 | 0.37262  | -0.34431 |
| H | -7.36130 | 1.71500  | -2.42405 |
| H | -5.38098 | 2.03362  | -3.87630 |
| H | -3.18525 | 1.01977  | -3.27810 |
| H | -1.95035 | -0.51697 | -1.24818 |
| H | -2.62590 | -1.74621 | 0.82891  |
| H | -5.28311 | -1.31464 | 1.24870  |
| N | -2.91199 | -0.54097 | -0.90908 |
| C | 2.57509  | 3.39193  | 2.21041  |
| C | 3.73193  | 3.73025  | 3.12857  |
| C | 1.36311  | 4.24896  | 2.51560  |
| H | 2.30659  | 2.30965  | 2.33188  |
| C | 3.33160  | 3.61704  | 4.58544  |
| H | 4.08100  | 4.77538  | 2.91826  |
| H | 4.59049  | 3.04015  | 2.92057  |
| C | 0.96231  | 4.13511  | 3.97231  |
| H | 1.59370  | 5.32002  | 2.27477  |
| H | 0.50662  | 3.93398  | 1.86472  |
| C | 2.11886  | 4.47200  | 4.89119  |
| H | 4.18787  | 3.93353  | 5.23593  |
| H | 3.10287  | 2.54572  | 4.82693  |
| H | 0.10408  | 4.82552  | 4.18046  |
| H | 0.61246  | 3.09000  | 4.18169  |
| H | 1.80907  | 4.31663  | 5.95725  |
| H | 2.38653  | 5.55484  | 4.77225  |
| C | 3.01258  | 6.55390  | -1.75298 |
| C | 2.10993  | 7.38430  | -0.86336 |
| C | 4.37066  | 7.20564  | -1.91848 |
| H | 2.53314  | 6.43036  | -2.75948 |
| C | 1.97953  | 8.80273  | -1.37970 |
| H | 2.52822  | 7.40365  | 0.17732  |
| H | 1.09579  | 6.90964  | -0.80995 |
| C | 4.24027  | 8.62380  | -2.43560 |
| H | 4.90199  | 7.21617  | -0.93059 |
| H | 4.99283  | 6.60238  | -2.62941 |
| C | 3.33680  | 9.45457  | -1.54733 |
| H | 1.35854  | 9.40601  | -0.66773 |
| H | 1.44647  | 8.79253  | -2.36668 |
| H | 5.25430  | 9.09864  | -2.48858 |

|   |          |          |          |
|---|----------|----------|----------|
| H | 3.82282  | 8.60365  | -3.47665 |
| H | 3.21043  | 10.47626 | -1.99091 |
| H | 3.81657  | 9.58078  | -0.54123 |
| C | 4.60003  | 1.77426  | -2.28765 |
| C | 4.28449  | 2.07815  | -3.73812 |
| C | 6.09536  | 1.76234  | -2.04192 |
| H | 4.16912  | 0.77560  | -2.01346 |
| C | 4.98685  | 1.11173  | -4.66992 |
| H | 4.60532  | 3.12609  | -3.97741 |
| H | 3.17705  | 2.01934  | -3.90165 |
| C | 6.79761  | 0.79529  | -2.97319 |
| H | 6.50680  | 2.79441  | -2.19647 |
| H | 6.29904  | 1.47410  | -0.97802 |
| C | 6.48164  | 1.09763  | -4.42377 |
| H | 4.78412  | 1.40120  | -5.73368 |
| H | 4.57413  | 0.07993  | -4.51686 |
| H | 7.90505  | 0.85442  | -2.81002 |
| H | 6.47704  | -0.25250 | -2.73272 |
| H | 6.96319  | 0.32798  | -5.08130 |
| H | 6.91432  | 2.09513  | -4.69968 |
| C | -0.44119 | -3.95052 | -3.09755 |
| C | -0.08926 | -5.31854 | -3.64568 |
| C | -1.33736 | -3.18977 | -4.05394 |
| H | 0.49964  | -3.36532 | -2.92282 |
| C | 0.53607  | -5.21748 | -5.02202 |
| H | -1.01690 | -5.94666 | -3.70316 |
| H | 0.62189  | -5.83125 | -2.94709 |
| C | -0.71165 | -3.08802 | -5.43006 |
| H | -2.32738 | -3.71144 | -4.13195 |
| H | -1.52909 | -2.16128 | -3.65159 |
| C | -0.35821 | -4.45543 | -5.97843 |
| H | 0.72626  | -6.24618 | -5.42461 |
| H | 1.52701  | -4.69755 | -4.94388 |
| H | -1.42293 | -2.57575 | -6.12878 |
| H | 0.21541  | -2.45900 | -5.37202 |
| H | 0.15923  | -4.34161 | -6.96630 |
| H | -1.29866 | -5.04060 | -6.15586 |
| C | -4.75227 | -4.88941 | -0.55878 |
| C | -5.44505 | -4.18973 | -1.71042 |

|   |          |          |          |
|---|----------|----------|----------|
| C | -4.90770 | -6.39366 | -0.65684 |
| H | -5.18777 | -4.53200 | 0.41115  |
| C | -6.90448 | -4.58673 | -1.79981 |
| H | -4.92810 | -4.45207 | -2.67079 |
| H | -5.36559 | -3.07948 | -1.57755 |
| C | -6.36720 | -6.79069 | -0.74541 |
| H | -4.36401 | -6.76625 | -1.56454 |
| H | -4.44020 | -6.87892 | 0.23893  |
| C | -7.06107 | -6.09053 | -1.89595 |
| H | -7.37122 | -4.10245 | -2.69653 |
| H | -7.44872 | -4.21251 | -0.89309 |
| H | -6.44668 | -7.90085 | -0.87875 |
| H | -6.88331 | -6.52893 | 0.21562  |
| H | -8.15030 | -6.35543 | -1.89477 |
| H | -6.62792 | -6.44916 | -2.86657 |
| C | -0.50713 | -4.11962 | 2.09037  |
| C | -1.45372 | -3.51571 | 3.10773  |
| C | -0.09052 | -5.52029 | 2.49176  |
| H | 0.40385  | -3.47176 | 1.99783  |
| C | -0.85330 | -3.53309 | 4.49868  |
| H | -2.41566 | -4.09280 | 3.10995  |
| H | -1.69471 | -2.46046 | 2.81615  |
| C | 0.51065  | -5.53752 | 3.88241  |
| H | -0.98424 | -6.19763 | 2.46329  |
| H | 0.65589  | -5.91596 | 1.75503  |
| C | -0.43470 | -4.93265 | 4.90018  |
| H | -1.60055 | -3.13874 | 5.23529  |
| H | 0.03929  | -2.85427 | 4.52782  |
| H | 0.75122  | -6.59276 | 4.17419  |
| H | 1.47302  | -4.96105 | 3.87924  |
| H | 0.06357  | -4.90210 | 5.90387  |
| H | -1.34503 | -5.58119 | 4.99528  |

Ind-(S)-O-TS

M06-2X/6-311G+(d,p)/CPCM(CH<sub>2</sub>Cl<sub>2</sub>)/B3LYP/6-31G(d,p)

single point energy: -4409.48339211 a.u.

number of imaginary frequencies: 1 (224.8188i)

|   |         |         |          |
|---|---------|---------|----------|
| C | 1.07431 | 2.63649 | -0.70599 |
|---|---------|---------|----------|

|   |          |          |          |
|---|----------|----------|----------|
| C | 2.33563  | 2.70916  | -1.36179 |
| C | 2.49284  | 3.70398  | -2.30445 |
| C | 1.44093  | 4.58954  | -2.65277 |
| C | 0.19876  | 4.52167  | -1.94280 |
| C | 0.05531  | 3.55785  | -0.88317 |
| C | 1.59827  | 5.54455  | -3.69345 |
| C | 0.56517  | 6.38139  | -4.04787 |
| C | -0.67481 | 6.29147  | -3.37315 |
| C | -0.85244 | 5.39012  | -2.34655 |
| C | -1.14291 | 3.55080  | 0.00815  |
| C | -1.51627 | 4.71983  | 0.76026  |
| C | -2.74485 | 4.70363  | 1.49597  |
| C | -3.53974 | 3.52989  | 1.49902  |
| C | -3.14164 | 2.36603  | 0.87421  |
| C | -1.91322 | 2.40742  | 0.15533  |
| C | -0.70497 | 5.88562  | 0.84055  |
| C | -1.10385 | 6.98020  | 1.57560  |
| C | -2.33777 | 6.97572  | 2.26678  |
| C | -3.13675 | 5.85686  | 2.22786  |
| O | -1.51844 | 1.24741  | -0.51274 |
| P | -0.17583 | 0.44608  | -0.06171 |
| O | 0.90530  | 1.61156  | 0.22992  |
| H | 3.45146  | 3.81077  | -2.80534 |
| H | 2.55110  | 5.59104  | -4.21434 |
| H | 0.69508  | 7.10205  | -4.85064 |
| H | -1.49696 | 6.93675  | -3.66983 |
| H | -1.81108 | 5.32832  | -1.84481 |
| H | -4.48229 | 3.54001  | 2.03953  |
| H | 0.24793  | 5.90552  | 0.32531  |
| H | -0.46033 | 7.85429  | 1.62886  |
| H | -2.64379 | 7.84848  | 2.83685  |
| H | -4.07796 | 5.83024  | 2.77129  |
| C | 3.47682  | 1.80781  | -0.98541 |
| C | 3.89578  | 0.76663  | -1.84947 |
| C | 4.17652  | 2.05207  | 0.21991  |
| C | 5.01196  | 0.00371  | -1.48886 |
| C | 5.27519  | 1.24467  | 0.53641  |
| C | 5.71476  | 0.21741  | -0.29979 |
| H | 5.33817  | -0.78955 | -2.15579 |

|   |          |          |          |
|---|----------|----------|----------|
| H | 5.81486  | 1.42797  | 1.46339  |
| C | -3.98866 | 1.12966  | 0.95037  |
| C | -4.72358 | 0.69905  | -0.18205 |
| C | -4.10110 | 0.42773  | 2.17325  |
| C | -5.54443 | -0.42791 | -0.06788 |
| C | -4.94381 | -0.68942 | 2.23052  |
| C | -5.67045 | -1.14119 | 1.12878  |
| H | -6.10913 | -0.75227 | -0.93831 |
| H | -5.03334 | -1.23207 | 3.16840  |
| O | 0.29822  | -0.19204 | -1.42800 |
| H | -0.25680 | -0.94461 | -1.78560 |
| N | 0.48663  | -3.76798 | -2.10919 |
| C | 0.76579  | -5.02928 | -1.79282 |
| C | 1.98391  | -5.64662 | -2.33807 |
| C | 2.33280  | -6.96600 | -2.00620 |
| C | 2.81179  | -4.89644 | -3.19375 |
| C | 3.50480  | -7.52294 | -2.51431 |
| H | 1.71021  | -7.55333 | -1.33715 |
| C | 3.96792  | -5.46547 | -3.71069 |
| H | 2.52989  | -3.87952 | -3.44439 |
| C | 4.31772  | -6.77828 | -3.36906 |
| H | 3.78486  | -8.53033 | -2.22440 |
| H | 4.60075  | -4.88976 | -4.38004 |
| H | 5.22794  | -7.21700 | -3.76944 |
| C | -0.75864 | -3.34787 | -2.57420 |
| O | -1.14308 | -2.18466 | -2.48157 |
| C | -0.24498 | -6.08163 | -1.81202 |
| N | -1.08513 | -6.88211 | -1.86238 |
| O | -0.31722 | -0.45089 | 1.10694  |
| O | -1.38308 | -4.33093 | -3.20068 |
| C | -2.68681 | -4.13795 | -3.90395 |
| C | -2.94441 | -5.53265 | -4.47595 |
| H | -2.14155 | -5.82683 | -5.15923 |
| H | -3.00739 | -6.27448 | -3.67380 |
| H | -3.88987 | -5.53723 | -5.02797 |
| C | -2.52138 | -3.10471 | -5.01966 |
| H | -3.43698 | -3.07982 | -5.62104 |
| H | -2.34234 | -2.10528 | -4.62008 |
| H | -1.69095 | -3.37975 | -5.67881 |

|   |          |          |          |
|---|----------|----------|----------|
| C | -3.75656 | -3.75172 | -2.88204 |
| H | -3.78479 | -4.47890 | -2.06365 |
| H | -3.57785 | -2.75950 | -2.46471 |
| H | -4.73693 | -3.75137 | -3.37187 |
| C | 1.98607  | -3.57320 | 1.51058  |
| C | 2.04820  | -4.97015 | 1.22520  |
| C | 3.10246  | -5.72742 | 1.77090  |
| C | 4.04822  | -5.09462 | 2.56703  |
| C | 3.96755  | -3.71040 | 2.83422  |
| C | 2.94129  | -2.93242 | 2.31048  |
| C | 0.24389  | -4.08775 | 0.19377  |
| C | 0.92048  | -5.26692 | 0.10613  |
| H | 3.16983  | -6.79544 | 1.57615  |
| H | 4.86230  | -5.67198 | 2.99746  |
| H | 4.71889  | -3.24409 | 3.46607  |
| H | 2.88005  | -1.86705 | 2.51432  |
| H | 0.55919  | -2.09837 | 0.89600  |
| H | -0.65119 | -3.88355 | -0.37732 |
| H | 0.46041  | -6.16191 | 0.66746  |
| N | 0.88048  | -3.06503 | 0.86411  |
| C | -4.69323 | 1.45290  | -1.50756 |
| C | -4.23861 | 0.57298  | -2.69400 |
| C | -6.05634 | 2.11469  | -1.82381 |
| H | -3.96651 | 2.26861  | -1.42514 |
| C | -4.19212 | 1.37188  | -4.00601 |
| H | -4.93540 | -0.26914 | -2.81382 |
| H | -3.25518 | 0.14222  | -2.47429 |
| C | -6.00881 | 2.91167  | -3.13667 |
| H | -6.83141 | 1.33774  | -1.89538 |
| H | -6.34990 | 2.76782  | -0.99264 |
| C | -5.54116 | 2.03999  | -4.31126 |
| H | -3.89733 | 0.71393  | -4.83486 |
| H | -3.41230 | 2.14410  | -3.93177 |
| H | -6.99559 | 3.34370  | -3.35027 |
| H | -5.31645 | 3.75865  | -3.01904 |
| H | -5.47115 | 2.64069  | -5.22723 |
| H | -6.29473 | 1.26188  | -4.50499 |
| C | -6.55111 | -2.37475 | 1.23893  |
| C | -8.03508 | -2.08954 | 0.91367  |



|   |          |          |          |
|---|----------|----------|----------|
| C | -6.02830 | -3.54372 | 0.37145  |
| H | -6.51077 | -2.70977 | 2.28632  |
| C | -8.90356 | -3.34772 | 1.06837  |
| H | -8.11632 | -1.71842 | -0.11823 |
| H | -8.40753 | -1.28636 | 1.56215  |
| C | -6.89817 | -4.80131 | 0.52207  |
| H | -6.02216 | -3.22968 | -0.68315 |
| H | -4.98668 | -3.76282 | 0.63738  |
| C | -8.37481 | -4.51085 | 0.21498  |
| H | -9.94363 | -3.12121 | 0.80128  |
| H | -8.91341 | -3.65167 | 2.12591  |
| H | -6.52213 | -5.59836 | -0.13275 |
| H | -6.81021 | -5.17951 | 1.55149  |
| H | -8.98270 | -5.41022 | 0.37897  |
| H | -8.47919 | -4.25320 | -0.85030 |
| C | -3.34482 | 0.83637  | 3.43280  |
| C | -4.29585 | 1.36490  | 4.53363  |
| C | -2.46167 | -0.30246 | 3.99400  |
| H | -2.66642 | 1.65725  | 3.17617  |
| C | -3.52456 | 1.80900  | 5.78605  |
| H | -5.00914 | 0.57354  | 4.80526  |
| H | -4.89608 | 2.19755  | 4.14329  |
| C | -1.68958 | 0.14515  | 5.24410  |
| H | -3.08940 | -1.16741 | 4.25150  |
| H | -1.76722 | -0.63134 | 3.21383  |
| C | -2.63161 | 0.68450  | 6.33012  |
| H | -4.22720 | 2.14753  | 6.55891  |
| H | -2.89755 | 2.67686  | 5.53259  |
| H | -1.09623 | -0.69216 | 5.63234  |
| H | -0.97198 | 0.92969  | 4.96346  |
| H | -2.05507 | 1.04206  | 7.19318  |
| H | -3.26736 | -0.13542 | 6.69762  |
| C | 3.18091  | 0.46113  | -3.16209 |
| C | 3.96532  | 0.98564  | -4.38936 |
| C | 2.86973  | -1.04098 | -3.35372 |
| H | 2.21548  | 0.97928  | -3.14738 |
| C | 3.20354  | 0.73379  | -5.70025 |
| H | 4.94566  | 0.48772  | -4.42823 |
| H | 4.17032  | 2.05768  | -4.27606 |

|   |          |          |          |
|---|----------|----------|----------|
| C | 2.08569  | -1.28780 | -4.65147 |
| H | 3.80634  | -1.61430 | -3.39658 |
| H | 2.30941  | -1.41381 | -2.49077 |
| C | 2.84045  | -0.74872 | -5.87529 |
| H | 3.79916  | 1.08257  | -6.55470 |
| H | 2.28056  | 1.33250  | -5.69832 |
| H | 1.88749  | -2.36118 | -4.76850 |
| H | 1.10412  | -0.79583 | -4.57905 |
| H | 2.24432  | -0.88774 | -6.78680 |
| H | 3.76347  | -1.33172 | -6.01436 |
| C | 6.91075  | -0.63716 | 0.08509  |
| C | 6.51927  | -2.11311 | 0.33318  |
| C | 8.06127  | -0.55324 | -0.94414 |
| H | 7.30089  | -0.24236 | 1.03598  |
| C | 7.72985  | -2.96256 | 0.74960  |
| H | 6.08062  | -2.52852 | -0.58571 |
| H | 5.73582  | -2.16508 | 1.09927  |
| C | 9.27007  | -1.40239 | -0.52096 |
| H | 7.69935  | -0.90319 | -1.92194 |
| H | 8.35878  | 0.49444  | -1.08074 |
| C | 8.87397  | -2.86522 | -0.27050 |
| H | 7.42417  | -4.00855 | 0.88262  |
| H | 8.09153  | -2.61944 | 1.73089  |
| H | 10.05518 | -1.34465 | -1.28606 |
| H | 9.70233  | -0.98322 | 0.40014  |
| H | 9.74270  | -3.44107 | 0.07322  |
| H | 8.55291  | -3.31951 | -1.22046 |
| C | 3.80120  | 3.18247  | 1.17284  |
| C | 3.36038  | 2.67042  | 2.56399  |
| C | 4.93725  | 4.22381  | 1.31787  |
| H | 2.94519  | 3.71955  | 0.75034  |
| C | 2.95589  | 3.82979  | 3.48837  |
| H | 4.18399  | 2.10879  | 3.02730  |
| H | 2.52680  | 1.96863  | 2.44803  |
| C | 4.52904  | 5.38073  | 2.24350  |
| H | 5.83481  | 3.73578  | 1.72349  |
| H | 5.21408  | 4.60753  | 0.32731  |
| C | 4.07882  | 4.86953  | 3.62002  |
| H | 2.67947  | 3.43986  | 4.47677  |

|   |         |         |         |
|---|---------|---------|---------|
| H | 2.05644 | 4.31717 | 3.08346 |
| H | 5.36219 | 6.08781 | 2.35060 |
| H | 3.70333 | 5.93963 | 1.77864 |
| H | 3.75069 | 5.70772 | 4.24865 |
| H | 4.93763 | 4.41134 | 4.13311 |

## References

1. Oyamada, Y.; Fujii, M.; Takehara, T.; Suzuki, T.; Nakamura, S. Catalytic Enantioselective Construction of an  $\alpha$ -Thio-Substituted  $\alpha$ -Aminonitriles-Bearing Tetrasubstituted Carbon Center. *ACS Catal.* **2024**, *14*, 3411–3419.
2. Takizawa, S.; Rémond, E.; Arteaga, F.; Yoshida, Y.; Sridharan, V.; Bayardon, J.; Juge, S.; Sasai, H. P-Chirogenic Organocatalysts: Application to the Aza-Morita–Baylis–Hillman (Aza-MBH) Reaction of Ketimines. *Chem. Commun.* **2013**, *49*, 8392–8394.

# Spectral Data for Materials

## (Z)-2-[(*tert*-Butoxycarbonylimino)]-2-(2-chlorophenyl)acetonitrile (1j)

$^1\text{H}$  NMR ( $\text{CDCl}_3$ , 300 MHz)

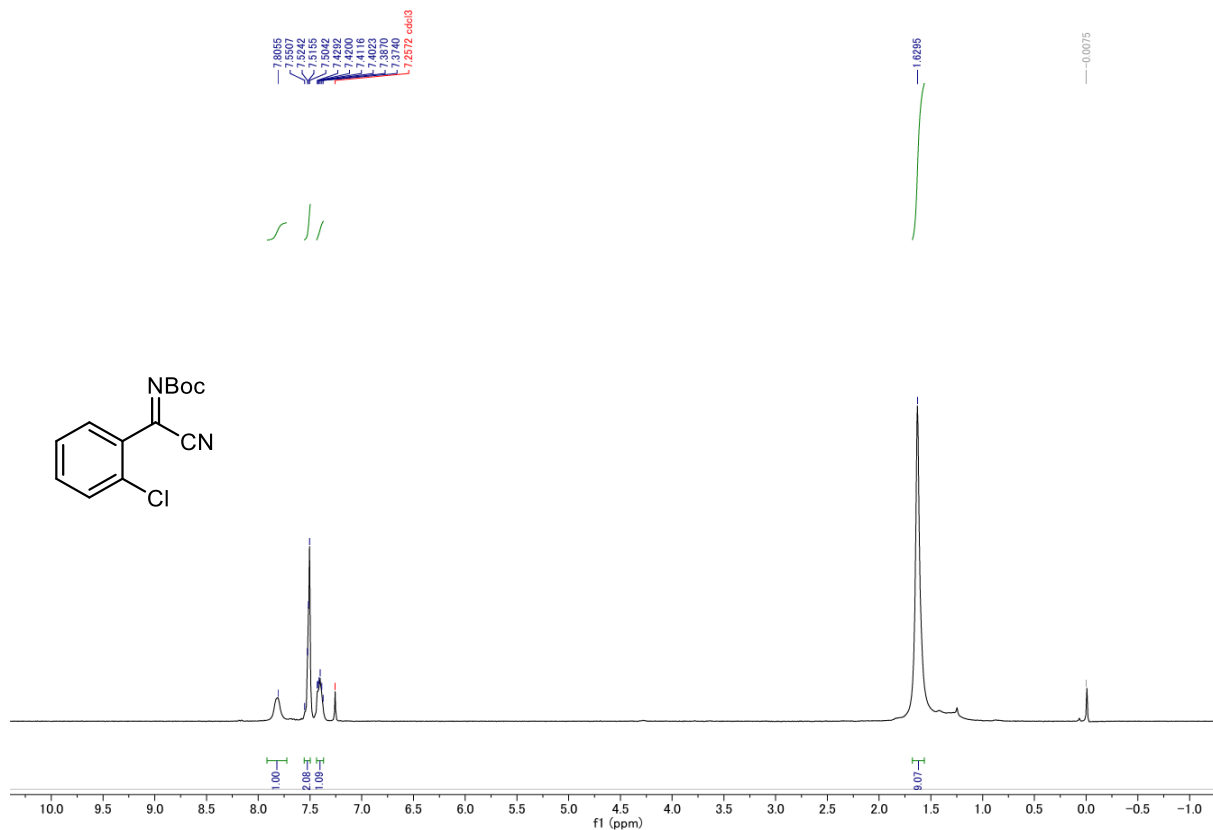

$^{13}\text{C}$  NMR ( $\text{CDCl}_3$ , 125 MHz)

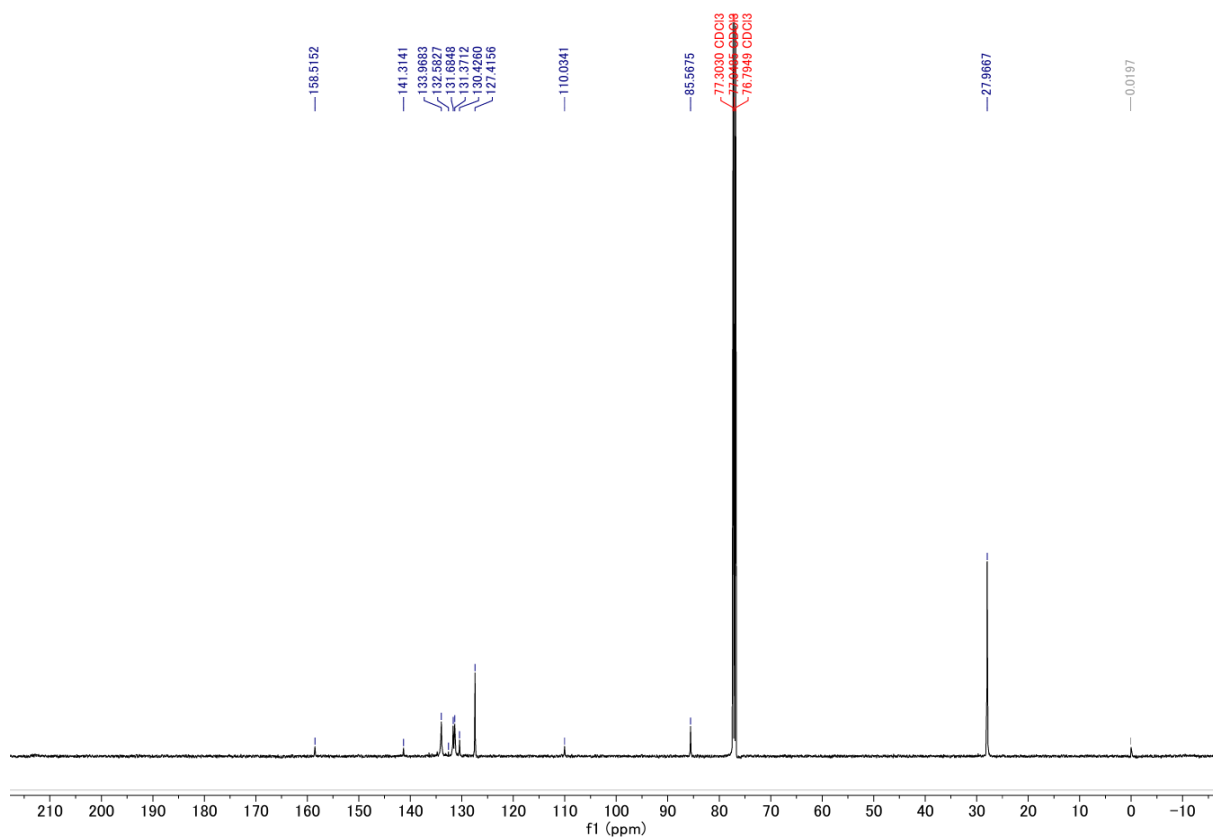

## Spectral Data for Isolated Products

### (S)-2-Phenyl-2-(1H-pyrrol-2-yl)-2-(tert-butoxycarbonylamino)acetonitrile (4aa)

$^1\text{H}$  NMR ( $\text{CDCl}_3$ , 300 MHz)

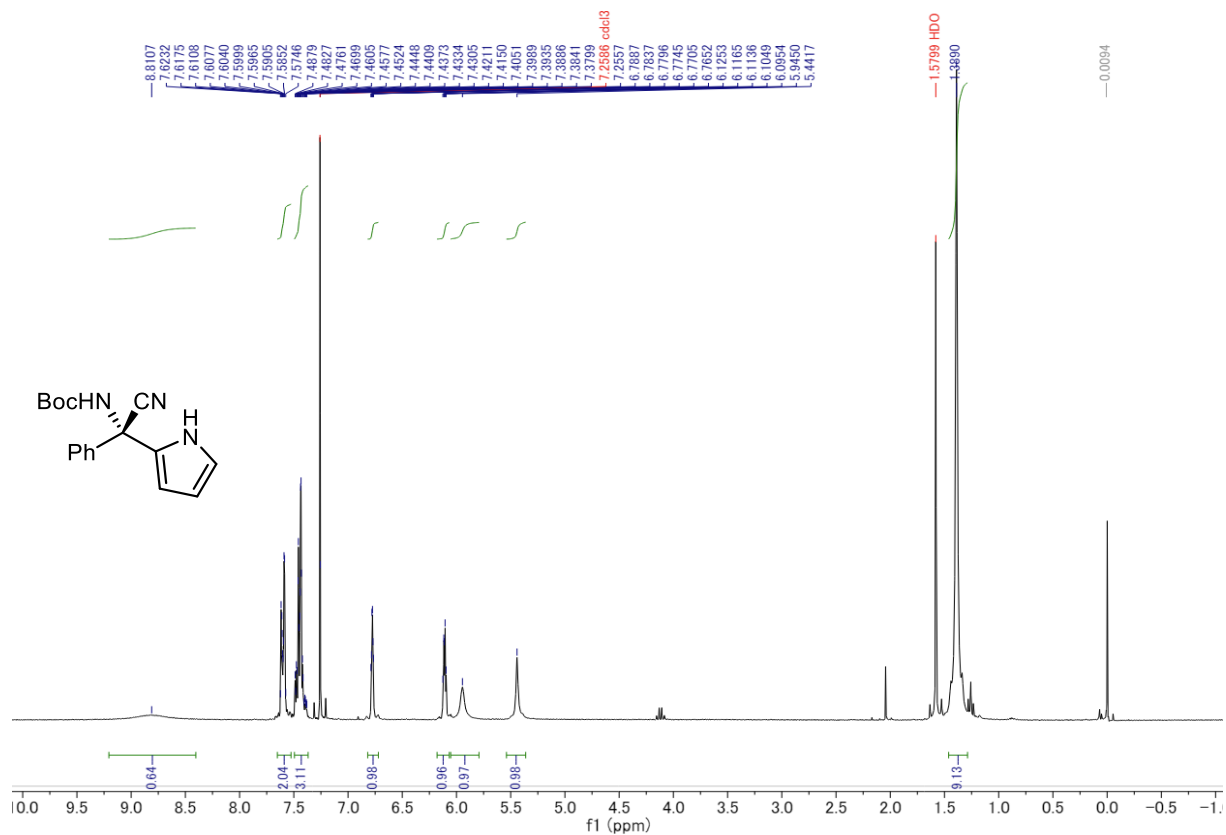

$^{13}\text{C}$  NMR ( $\text{CDCl}_3$ , 125 MHz)

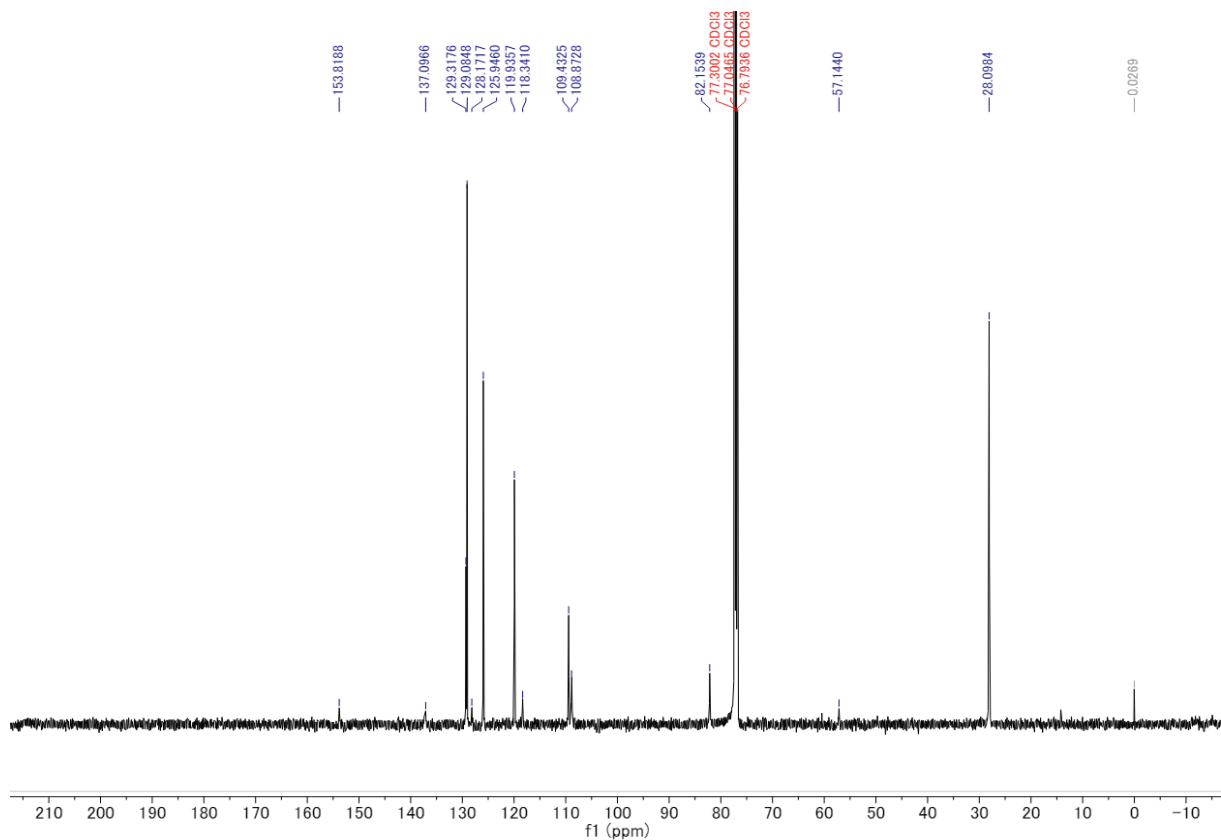

**(S)-2-Phenyl-2-(1-methyl-pyrrol-2-yl)-2-(tert-butoxycarbonylamino)acetonitrile (4aa-Me)**

$^1\text{H}$  NMR ( $\text{CDCl}_3$ , 300 MHz)

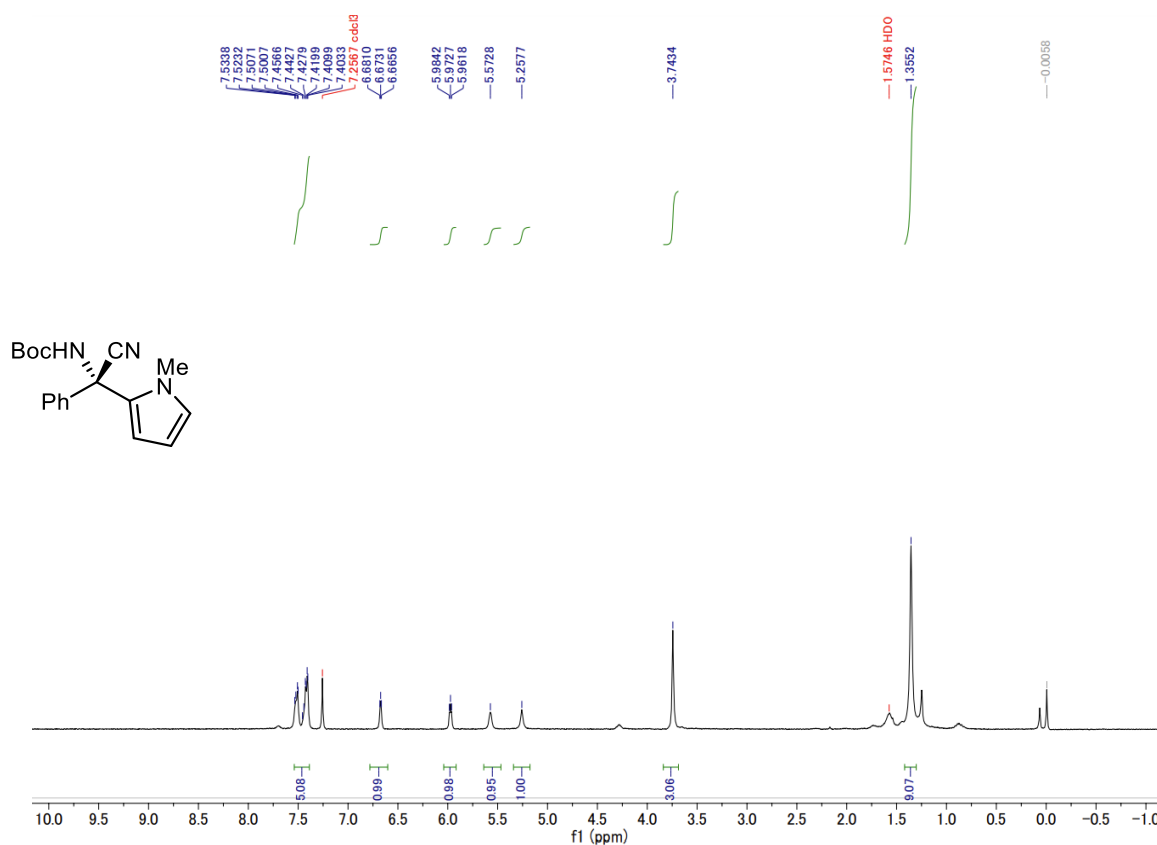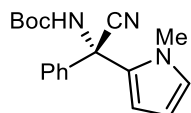

$^{13}\text{C}$  NMR ( $\text{CDCl}_3$ , 125 MHz)

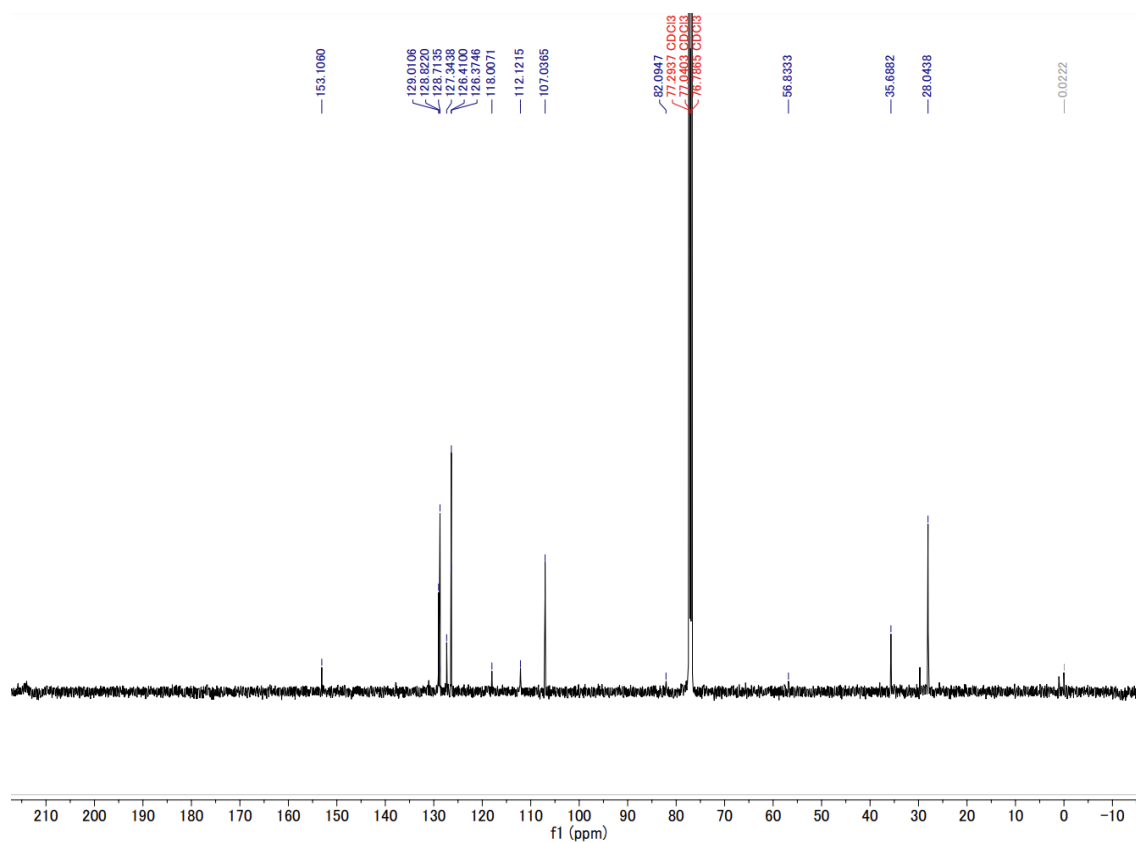

**(S)-2-(4-Fluorophenyl)-2-(1H-pyrrol-2-yl)-2-(tert-butoxycarbonylamino)acetonitrile (4ba)**

$^1\text{H}$  NMR ( $\text{CDCl}_3$ , 300 MHz)

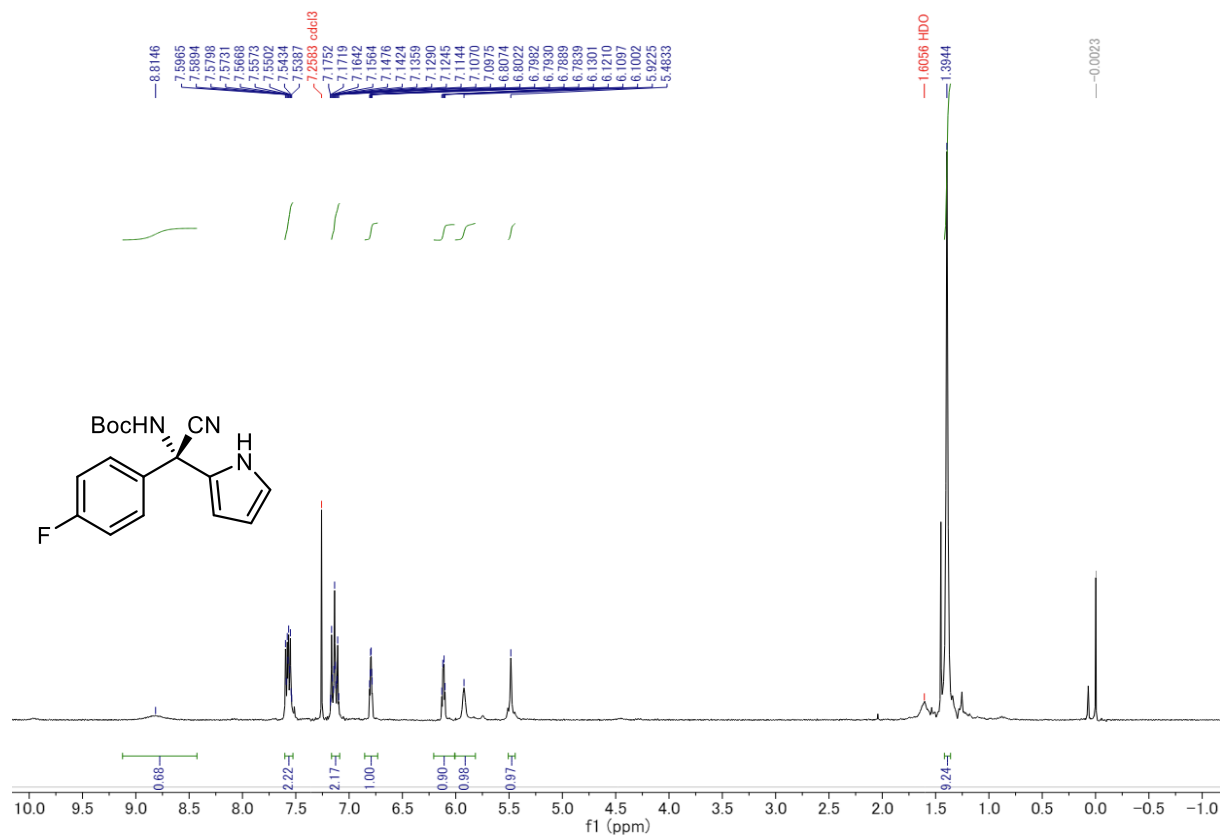

$^{13}\text{C}$  NMR ( $\text{CDCl}_3$ , 125 MHz)

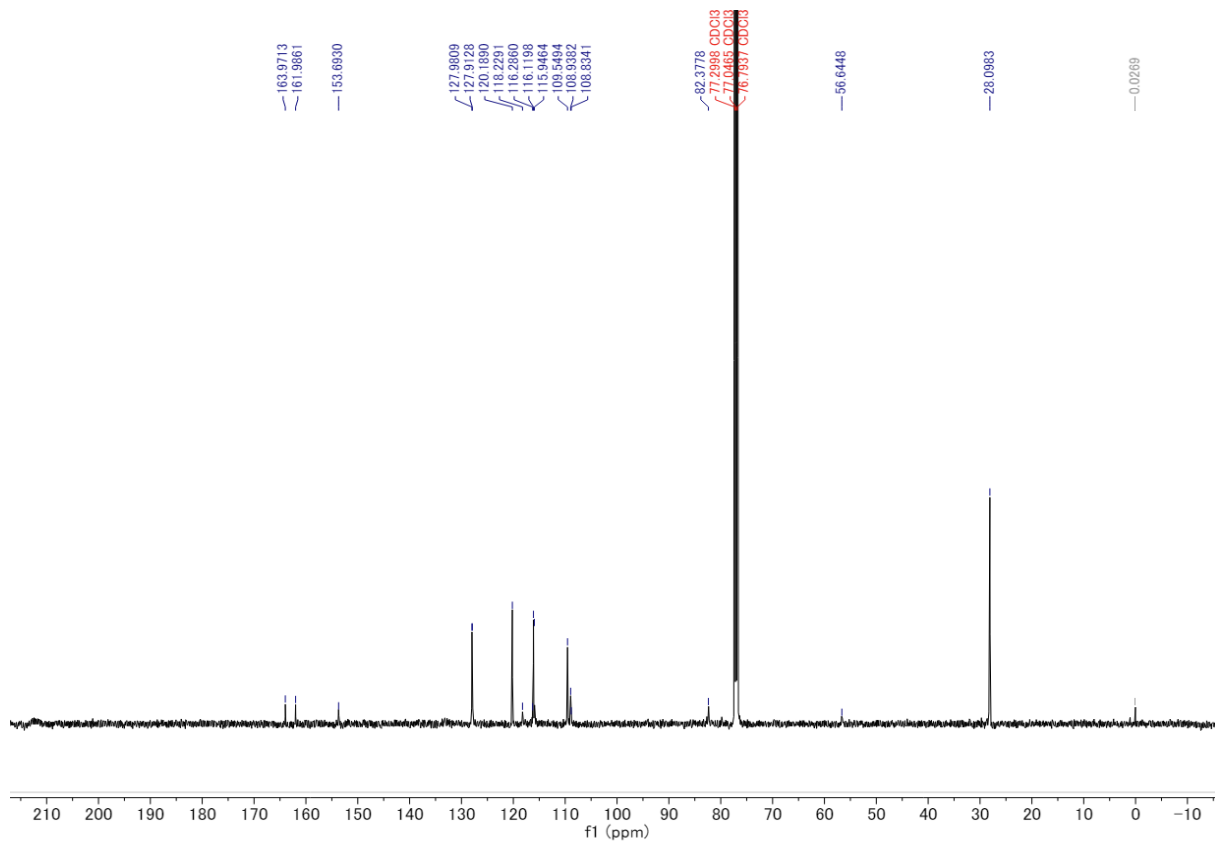



$^{19}\text{F}$  NMR ( $\text{CDCl}_3$ , 376 MHz)

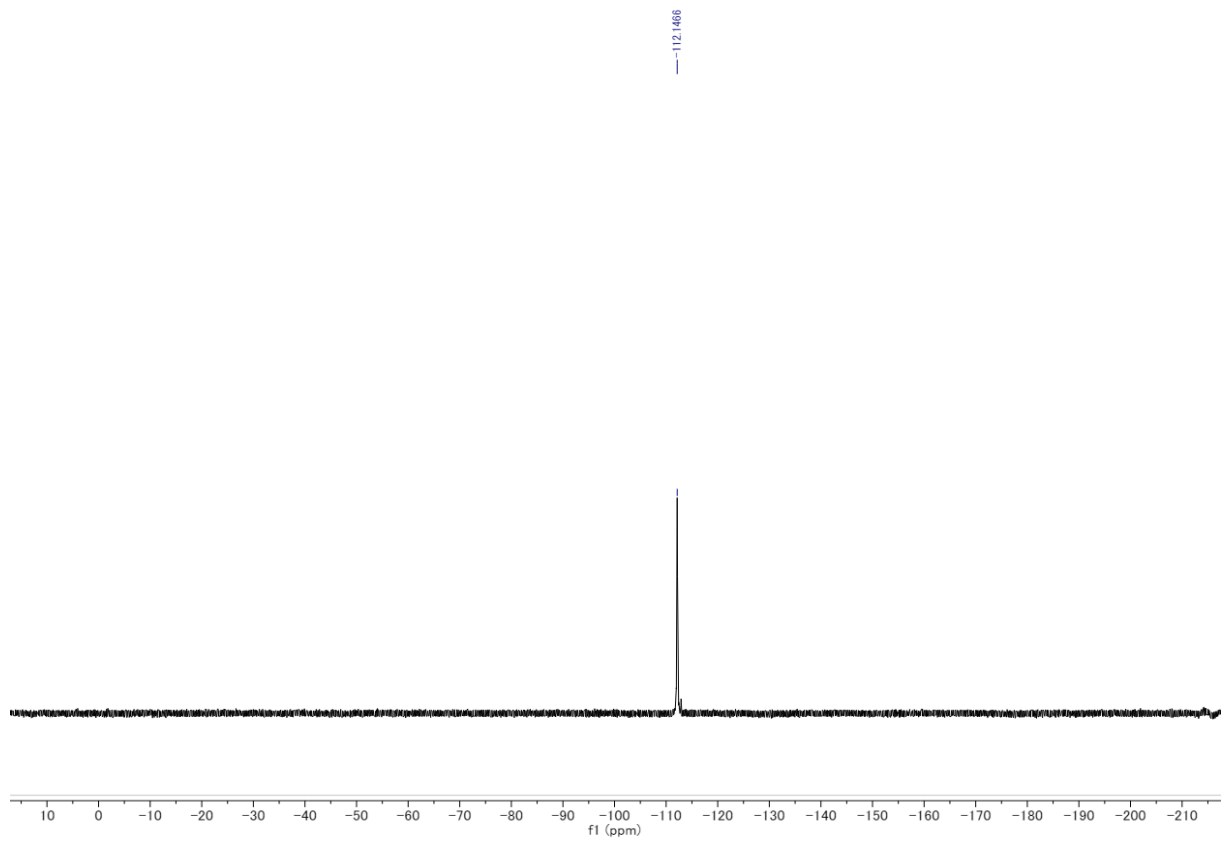

**(S)-2-(4-Chlorophenyl)-2-(1H-pyrrol-2-yl)-2-(tert-butoxycarbonylamino)acetonitrile (4ca)**

<sup>1</sup>H NMR (CDCl<sub>3</sub>, 300 MHz)

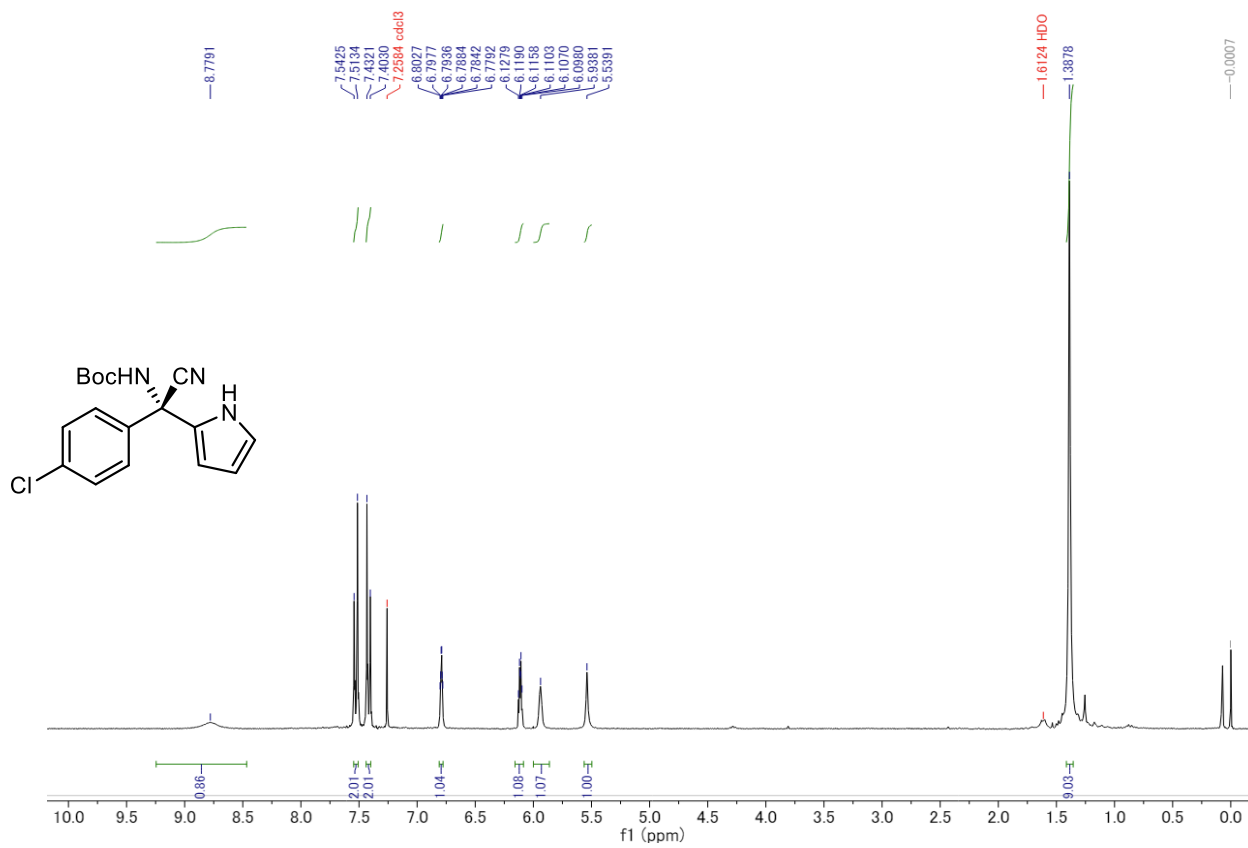

<sup>13</sup>C NMR (CDCl<sub>3</sub>, 125 MHz)

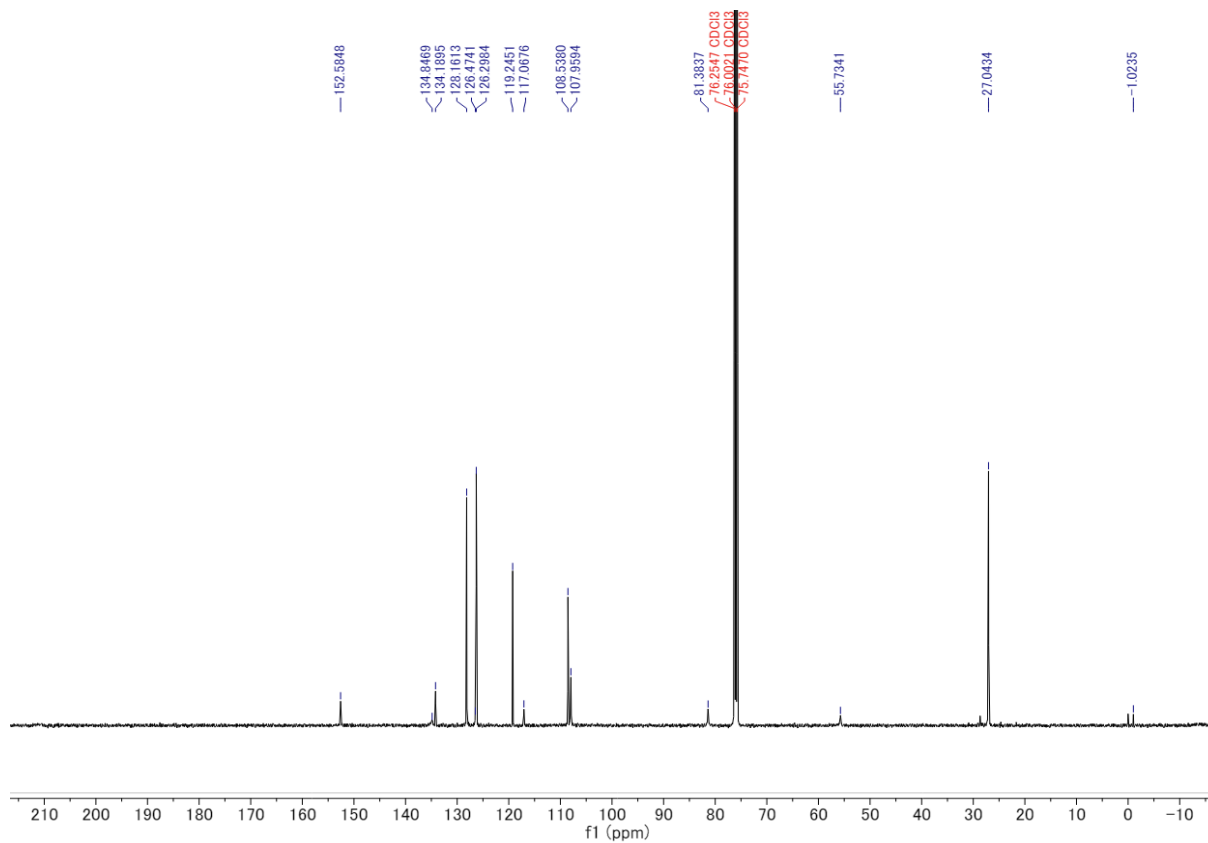

**(S)-2-(4-Bromophenyl)-2-(1H-pyrrol-2-yl)-2-(tert-butoxycarbonylamino)acetonitrile (4da)**

$^1\text{H}$  NMR ( $\text{CDCl}_3$ , 300 MHz)

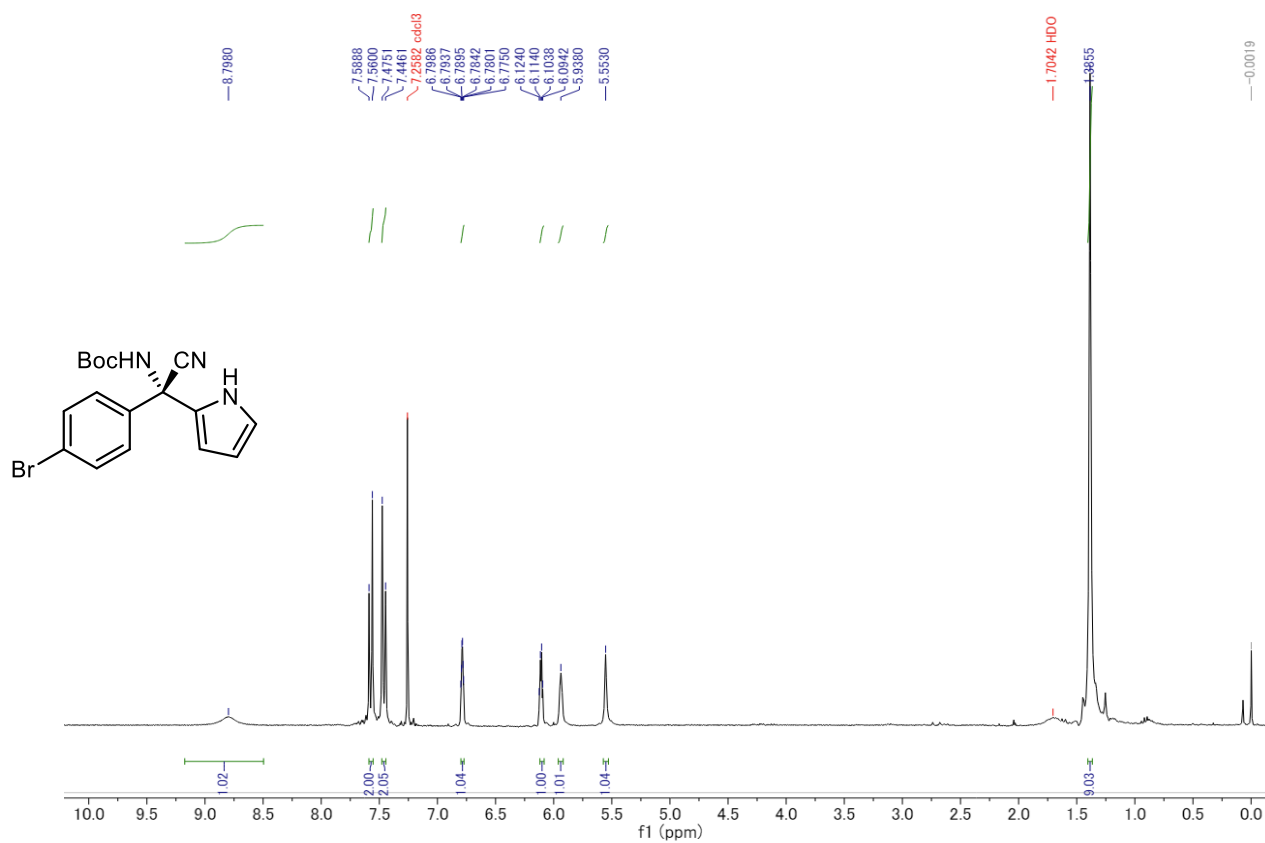

$^{13}\text{C}$  NMR ( $\text{CDCl}_3$ , 125 MHz)

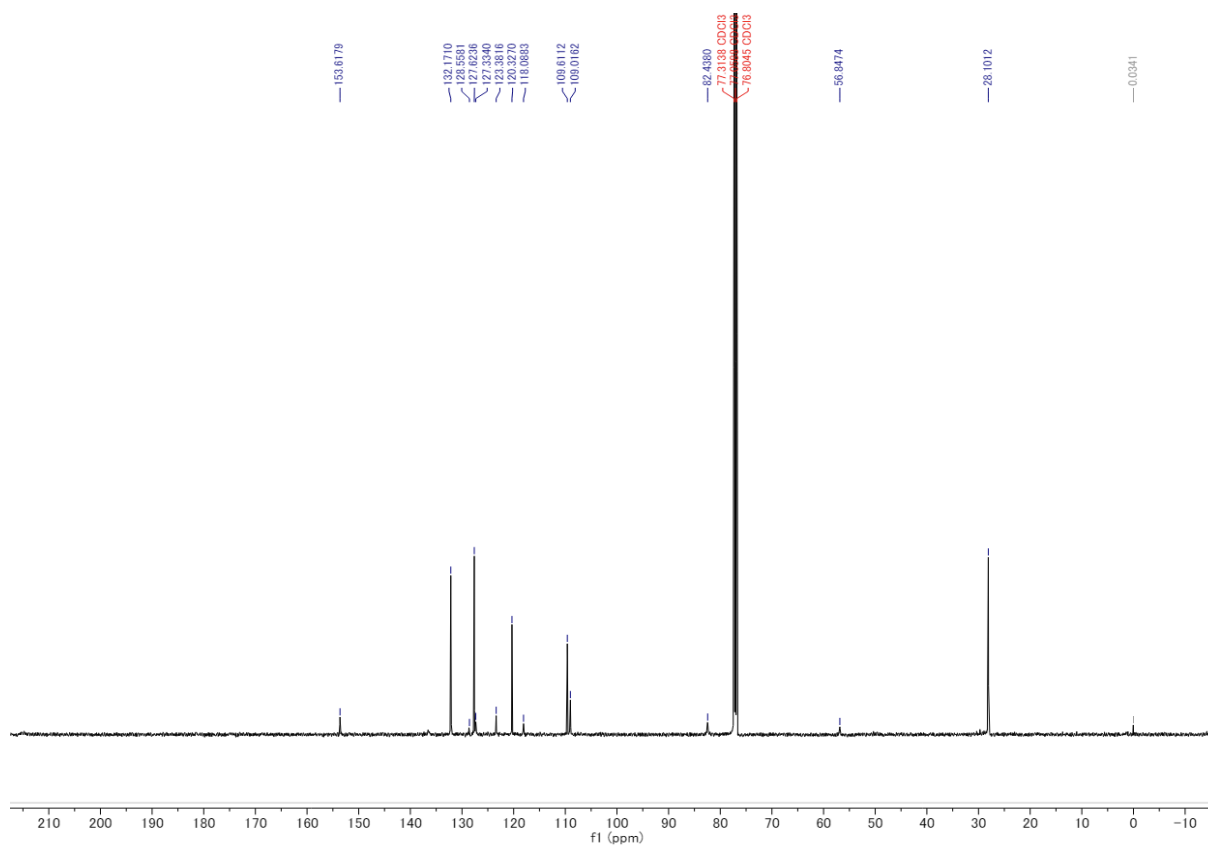

**(S)-2-(4-Iodophenyl)-2-(1H-pyrrol-2-yl)-2-(tert-butoxycarbonylamino)acetonitrile (4ea)**

$^1\text{H}$  NMR ( $\text{CDCl}_3$ , 300 MHz)

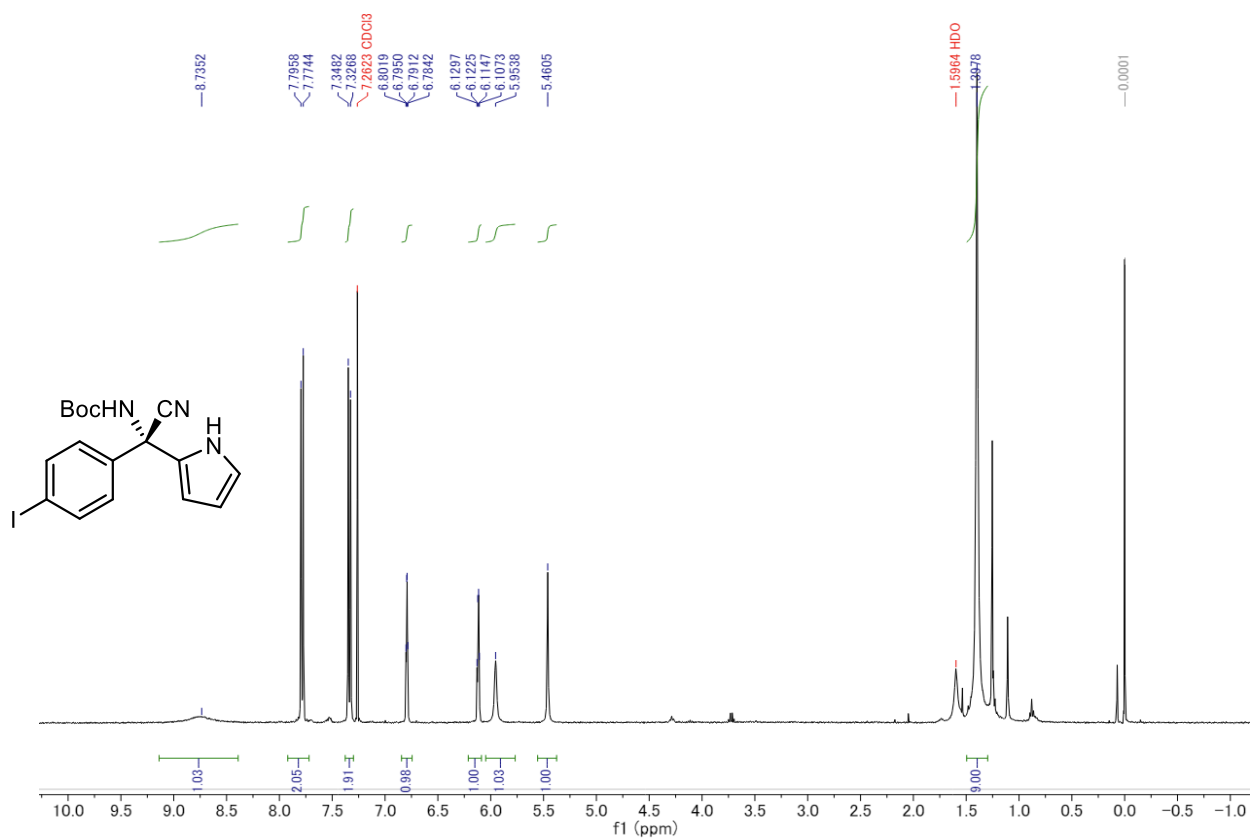

$^{13}\text{C}$  NMR ( $\text{CDCl}_3$ , 125 MHz)

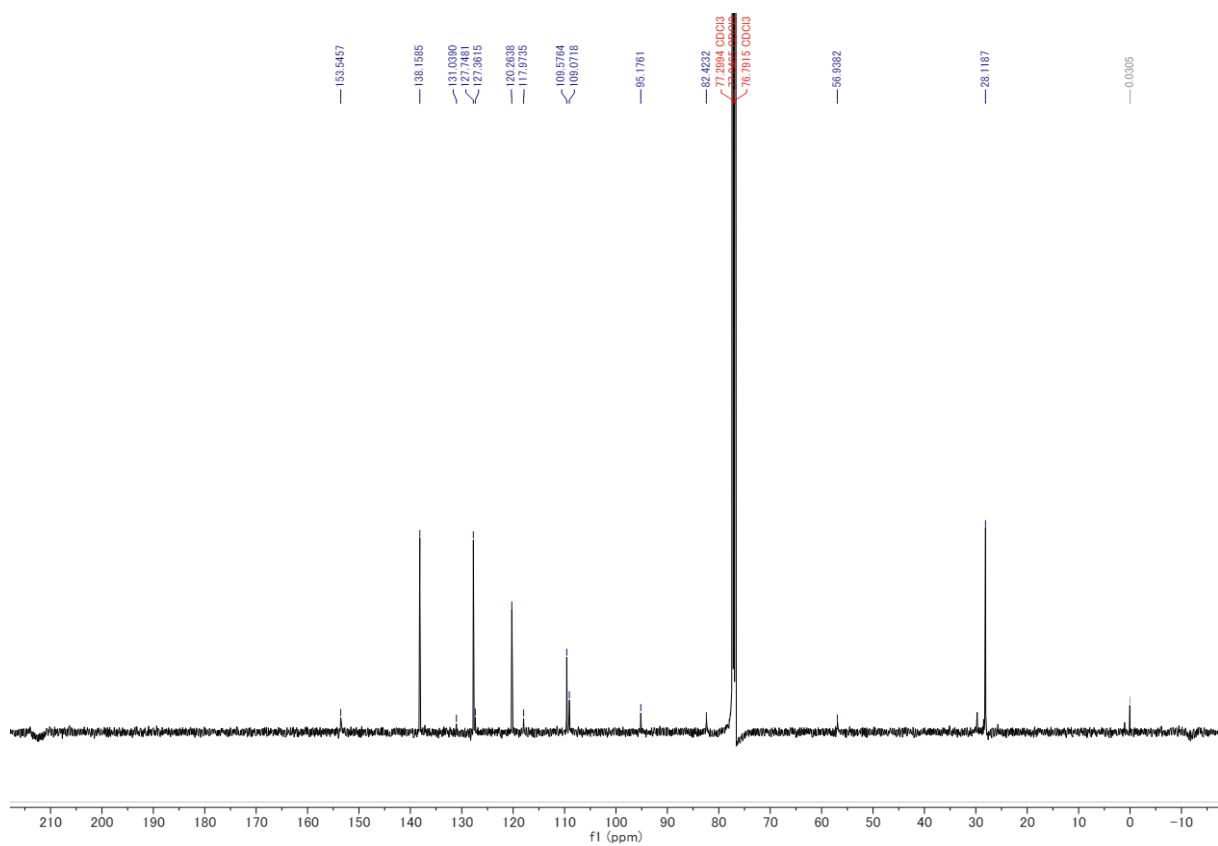

**(S)-2-(4-Methylphenyl)-2-(1H-pyrrol-2-yl)-2-(tert-butoxycarbonylamino)acetonitrile (4fa)**

$^1\text{H}$  NMR ( $\text{CDCl}_3$ , 300 MHz)

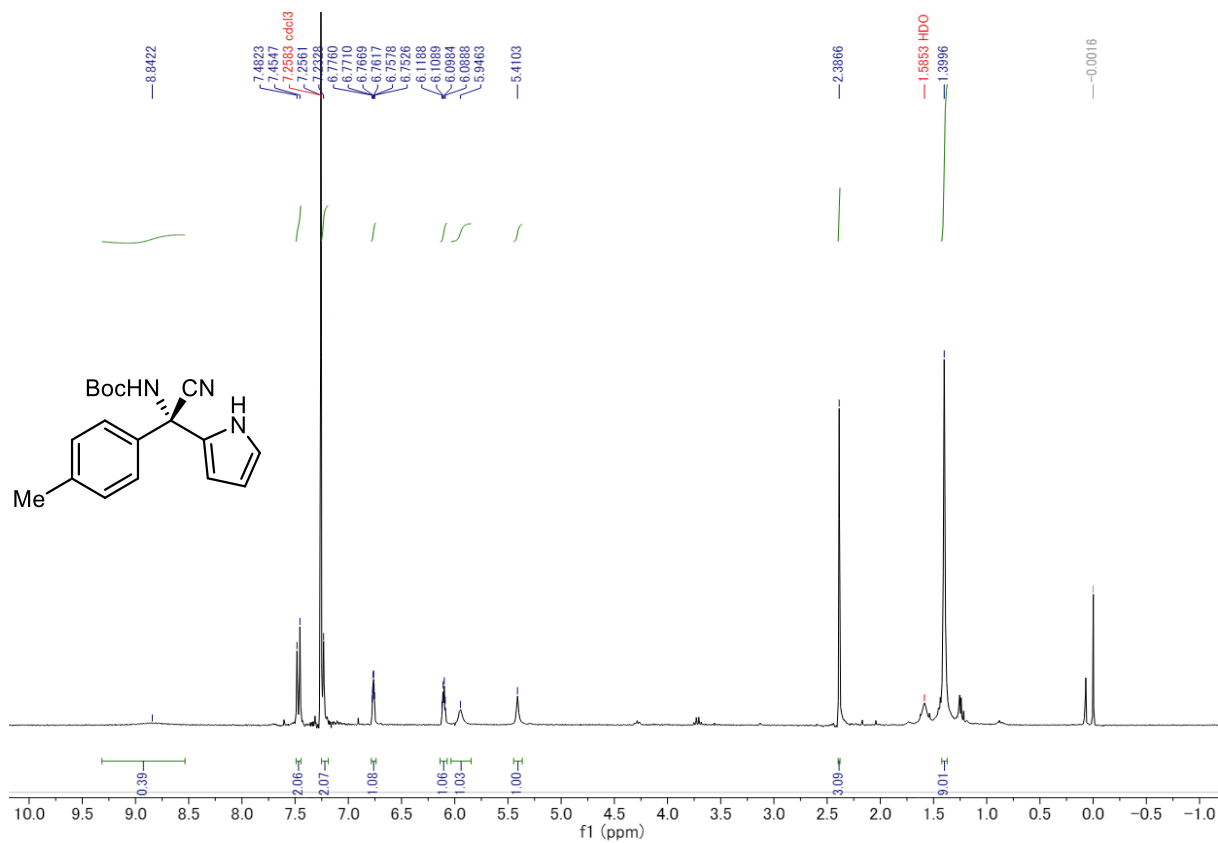

$^{13}\text{C}$  NMR ( $\text{CDCl}_3$ , 125 MHz)

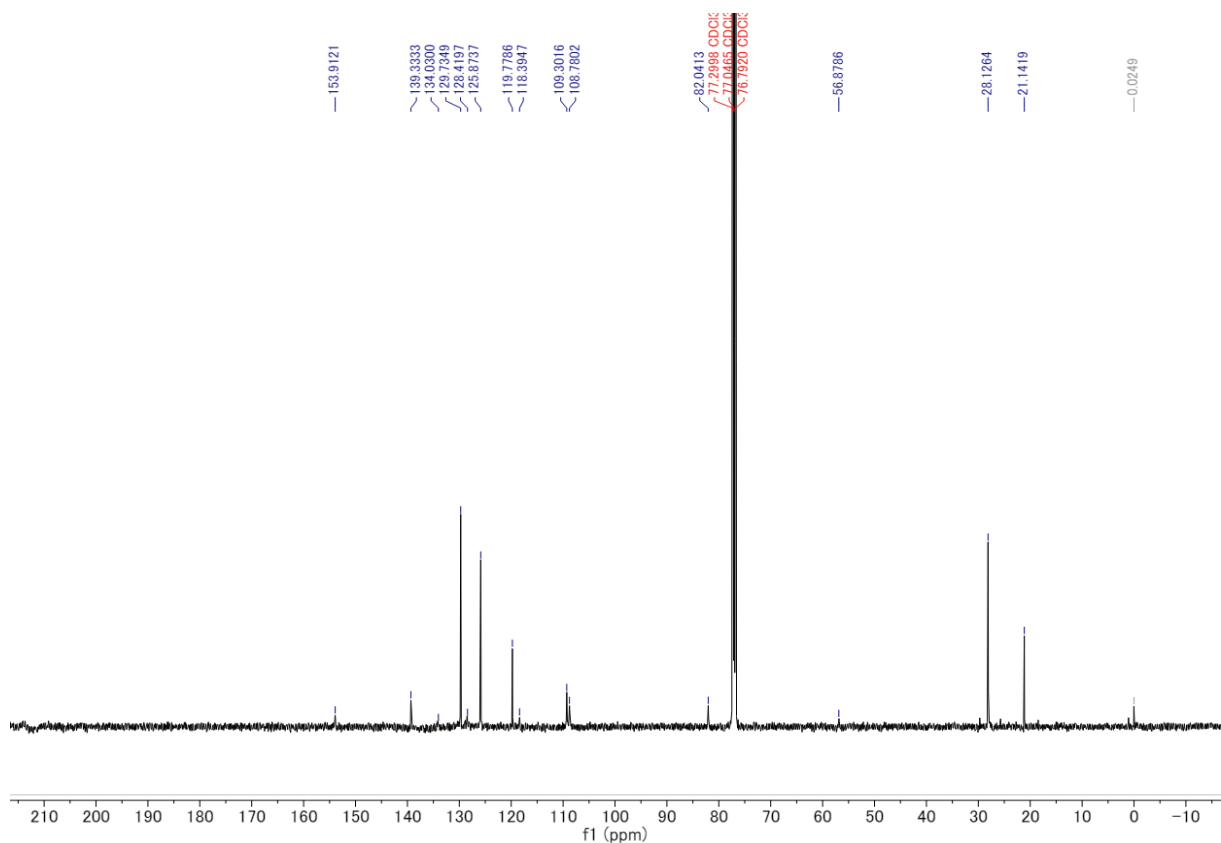

**(S)-2-(3-Bromophenyl)-2-(1H-pyrrol-2-yl)-2-(tert-butoxycarbonylamino)acetonitrile (4ga)**

$^1\text{H}$  NMR ( $\text{CDCl}_3$ , 300 MHz)

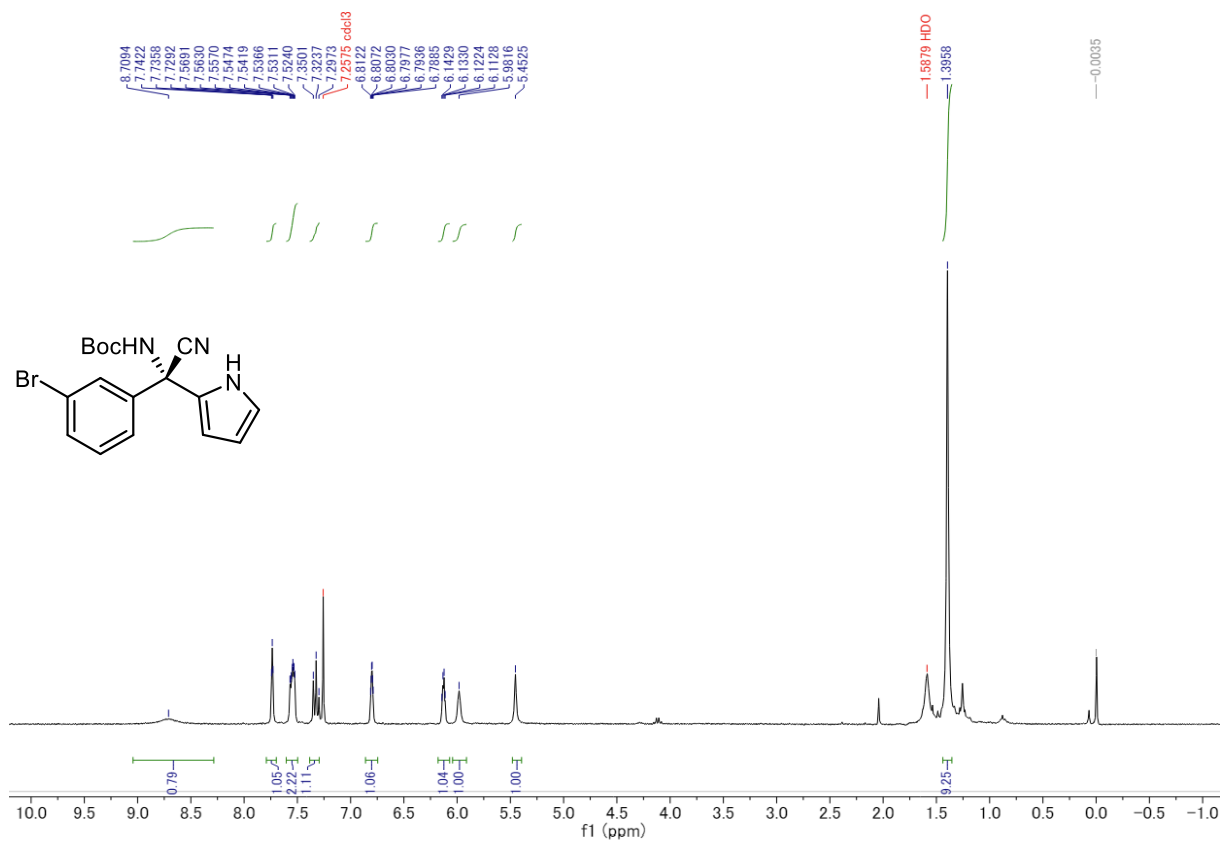

$^{13}\text{C}$  NMR ( $\text{CDCl}_3$ , 125 MHz)

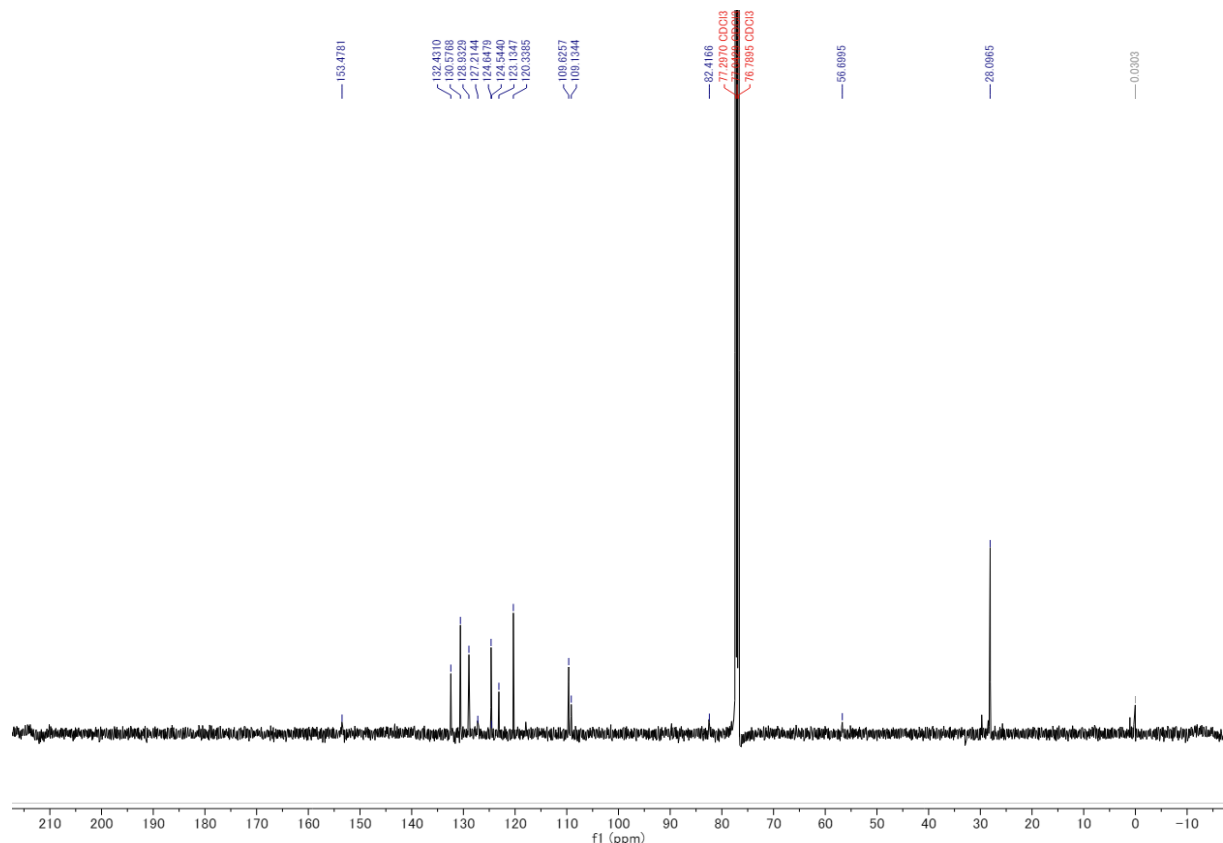

**(S)-2-(3-Methoxyphenyl)-2-(1H-pyrrol-2-yl)-2-(tert-butoxycarbonylamino)acetonitrile (4ha)**

<sup>1</sup>H NMR (CDCl<sub>3</sub>, 300 MHz)

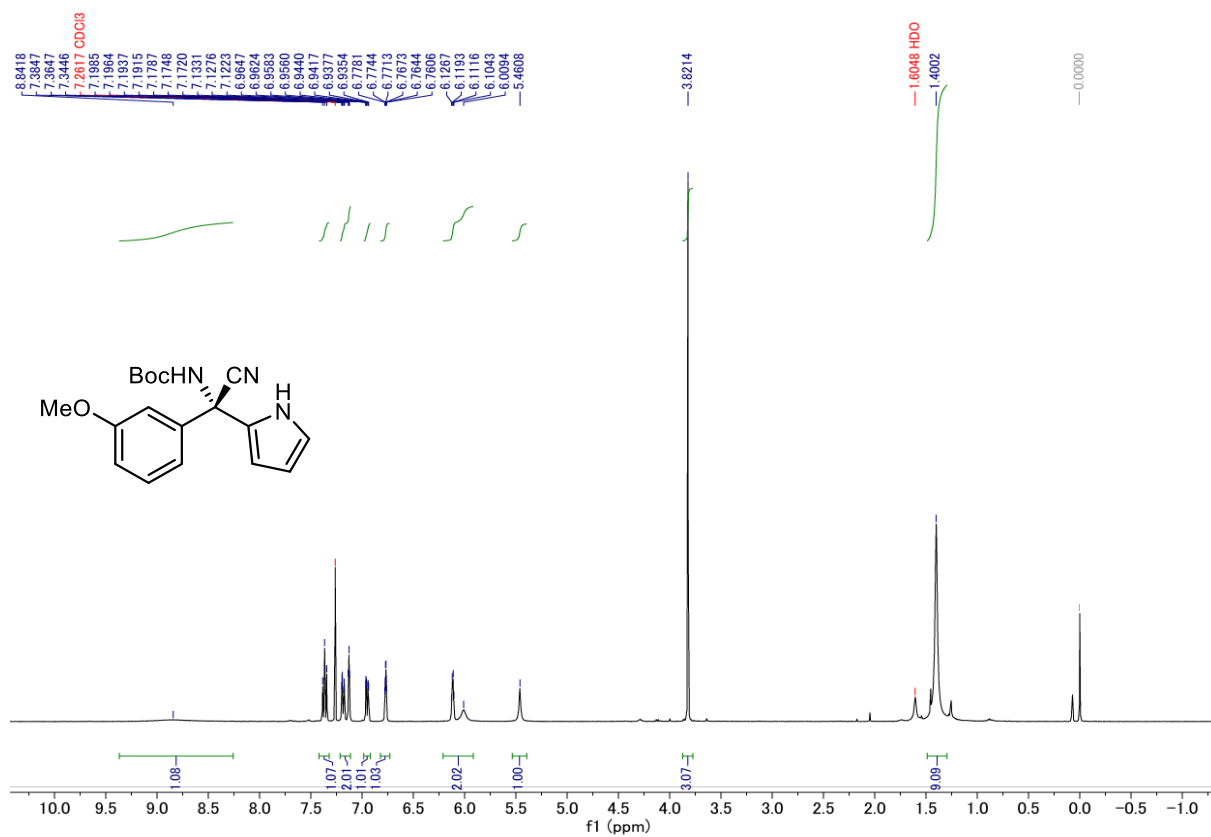

<sup>13</sup>C NMR (CDCl<sub>3</sub>, 125 MHz)

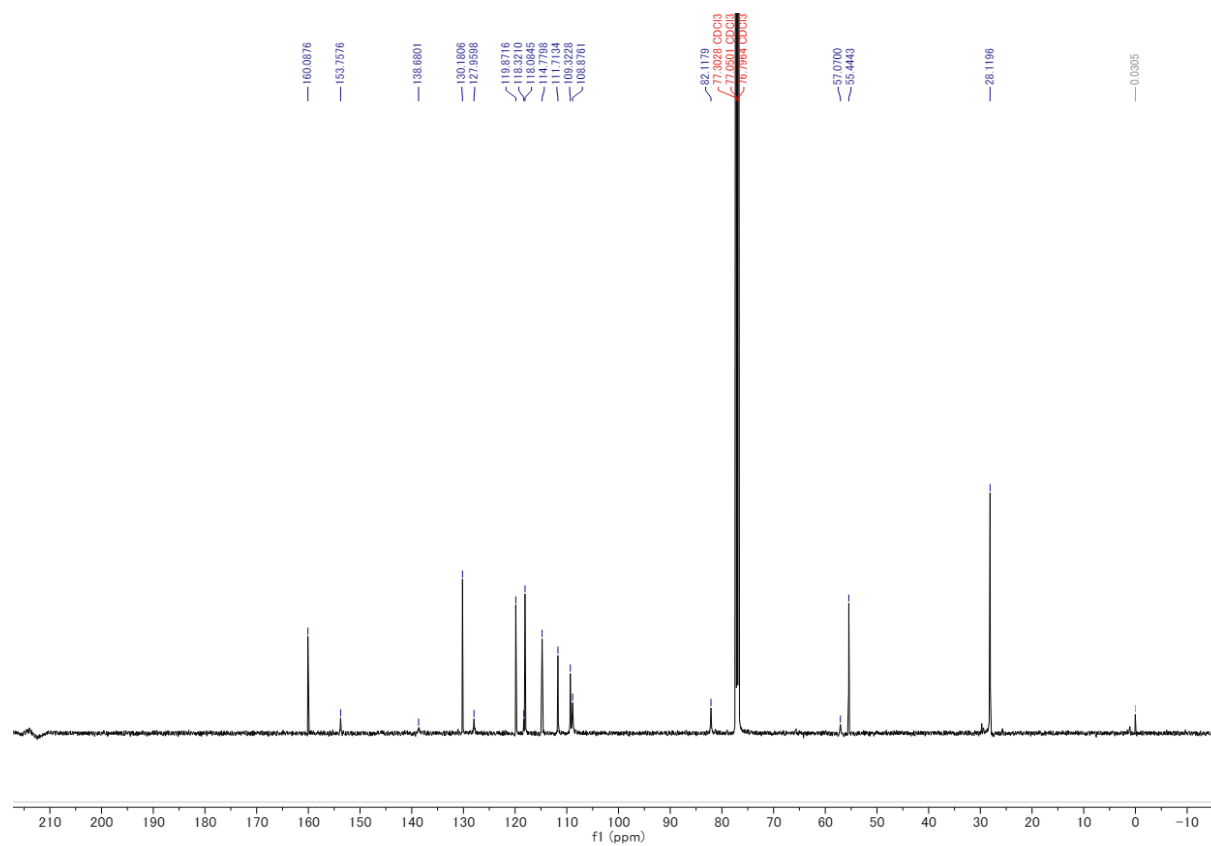

**(S)-2-(3-Methoxyphenyl)-2-(1H-pyrrol-2-yl)-2-(tert-butoxycarbonylamino)acetonitrile (4ia)**

<sup>1</sup>H NMR (CDCl<sub>3</sub>, 300 MHz)

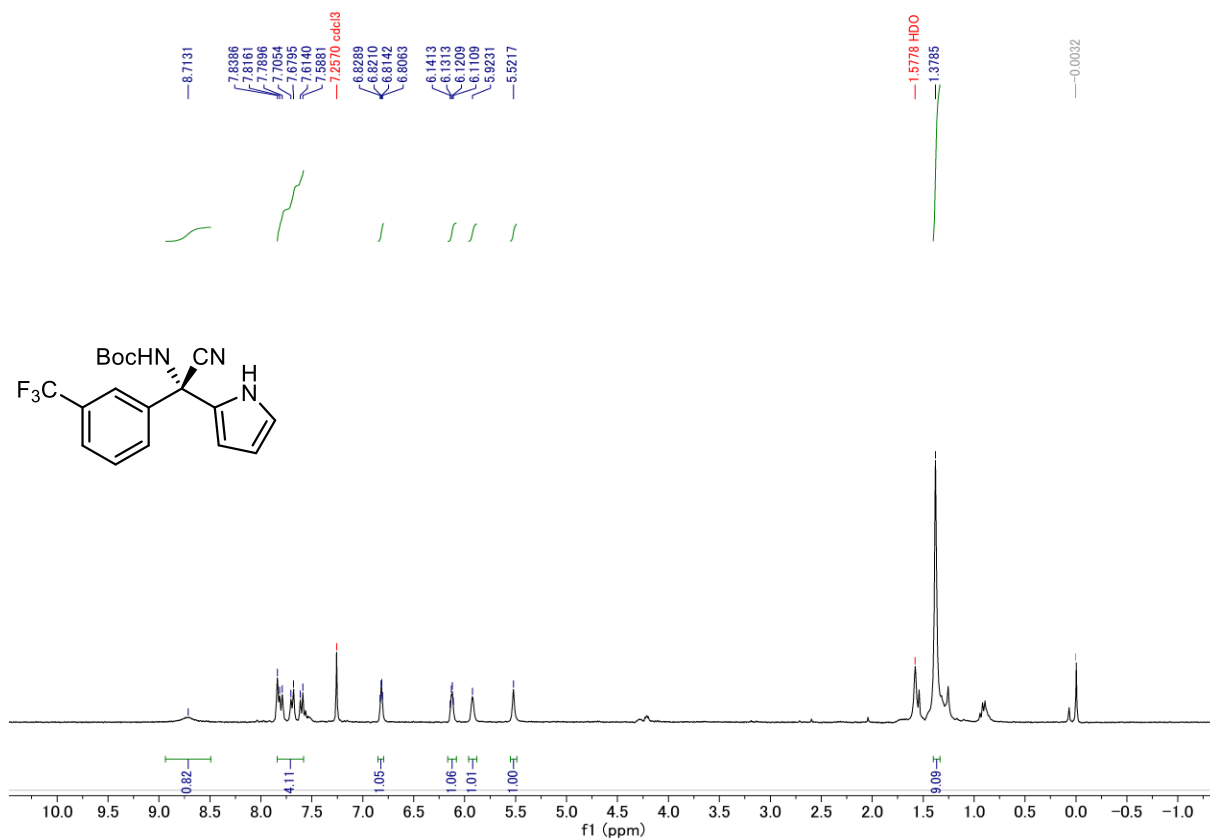

<sup>13</sup>C NMR (CDCl<sub>3</sub>, 125 MHz)

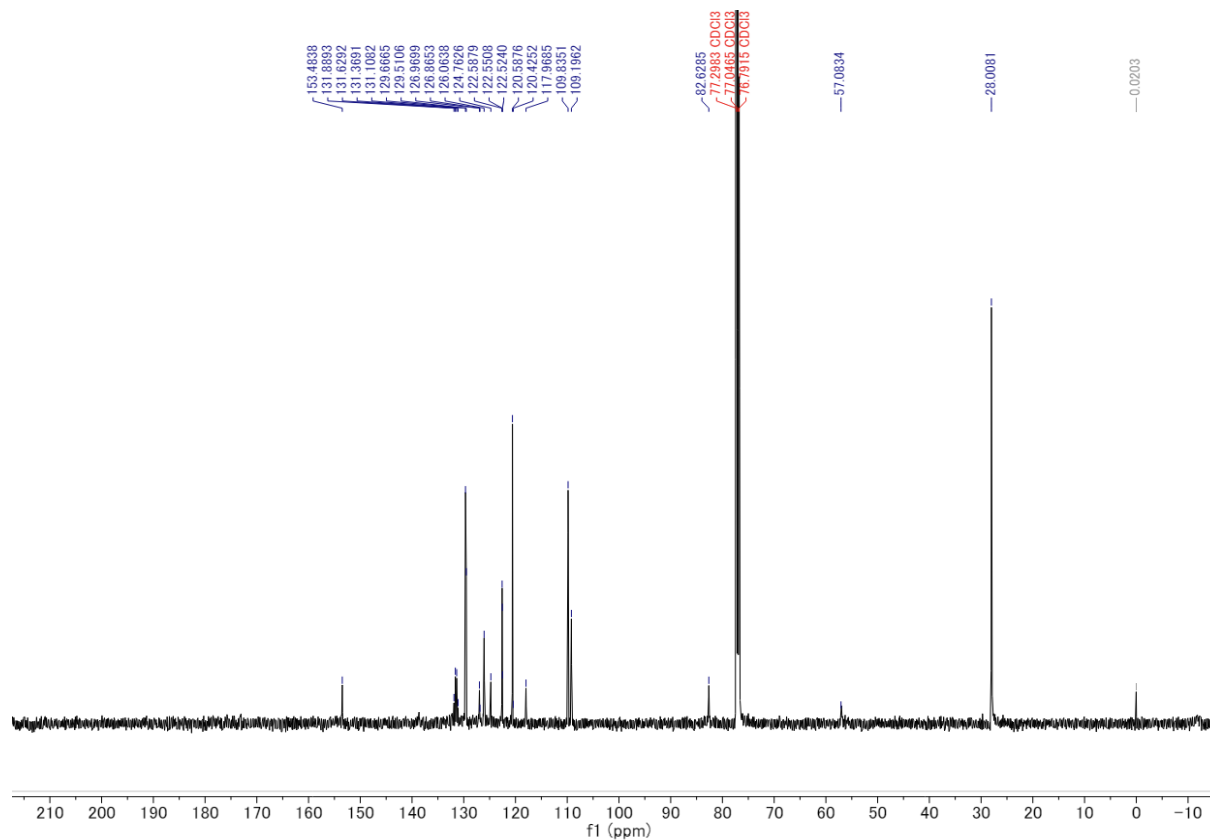



$^{19}\text{F}$  NMR ( $\text{CDCl}_3$ , 376 MHz)

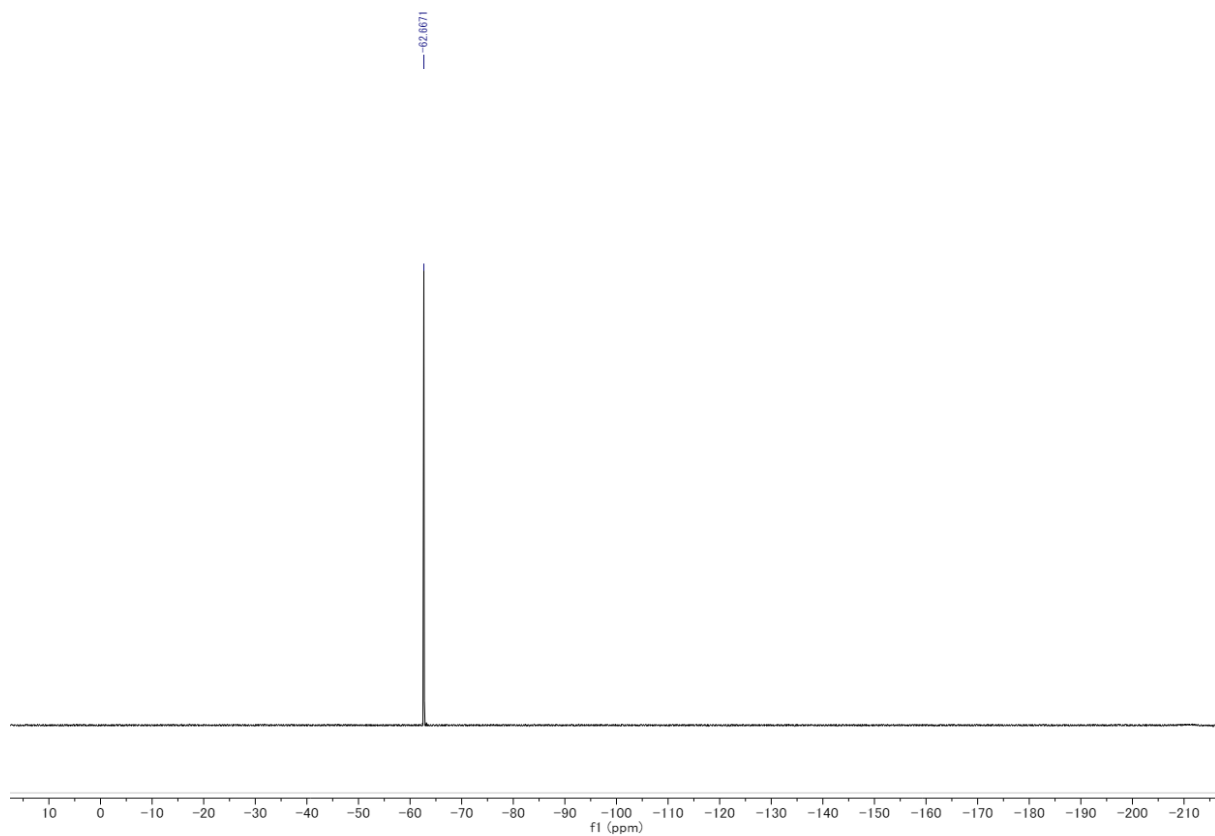

**(S)-2-(2-Bromophenyl)-2-(1H-pyrrol-2-yl)-2-(tert-butoxycarbonylamino)acetonitrile (4ja)**

$^1\text{H}$  NMR ( $\text{CDCl}_3$ , 300 MHz)

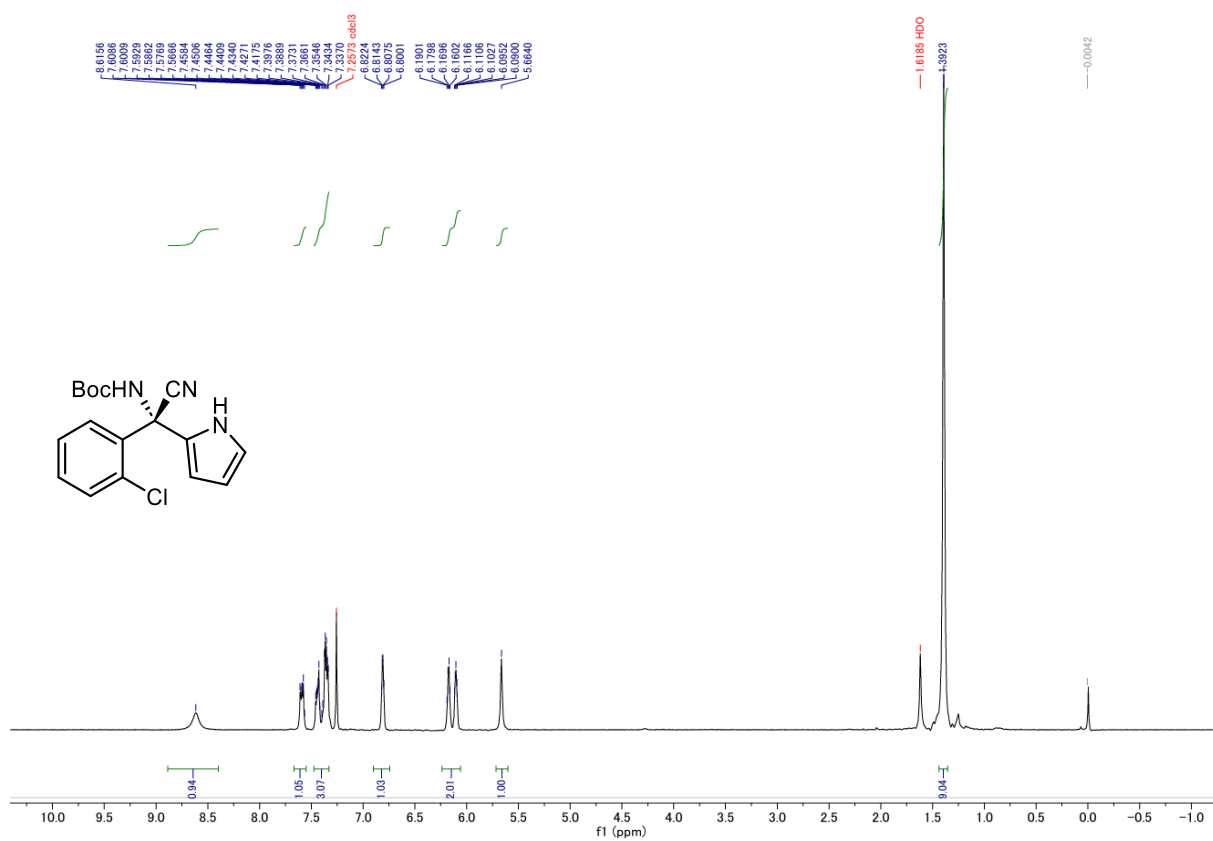

$^{13}\text{C}$  NMR ( $\text{CDCl}_3$ , 125 MHz)

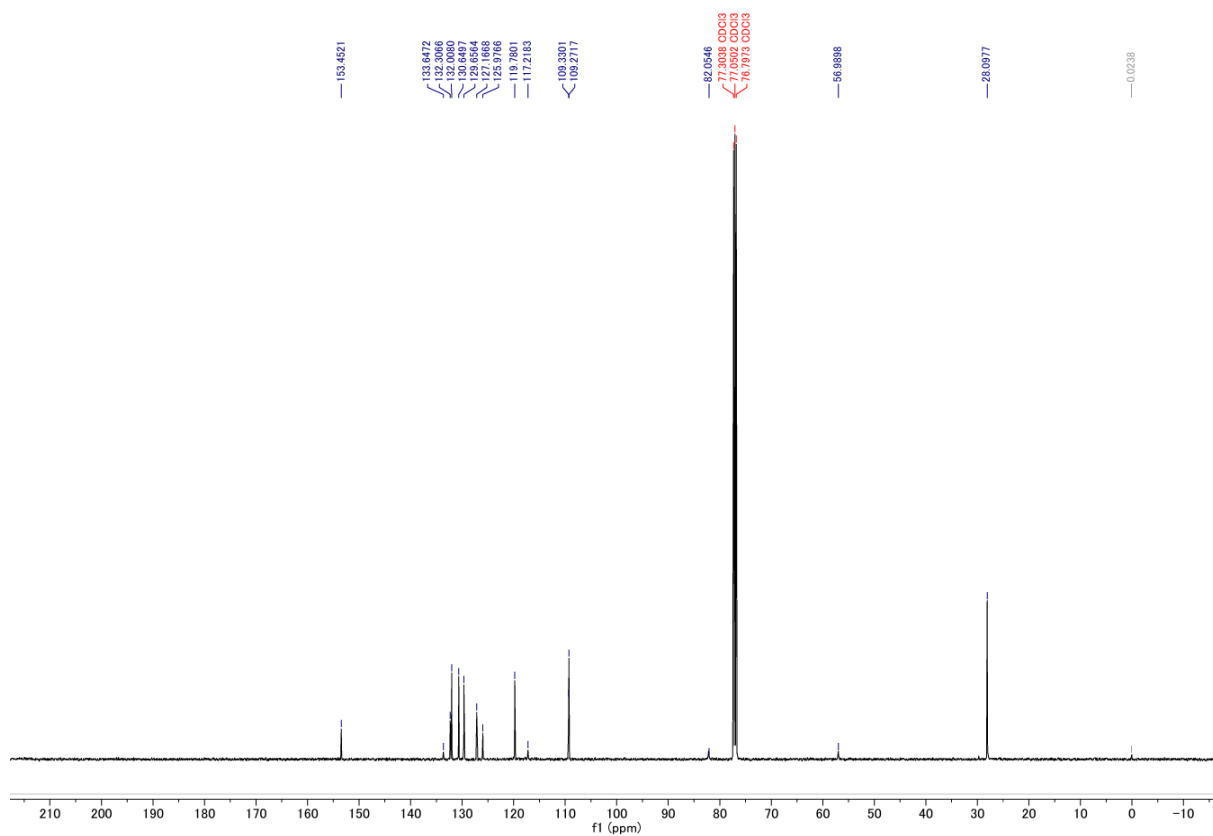

**(S)-2-(2-Methylphenyl)-2-(1H-pyrrol-2-yl)-2-(tert-butoxycarbonylamino)acetonitrile (4ka)**

<sup>1</sup>H NMR (CDCl<sub>3</sub>, 300 MHz)

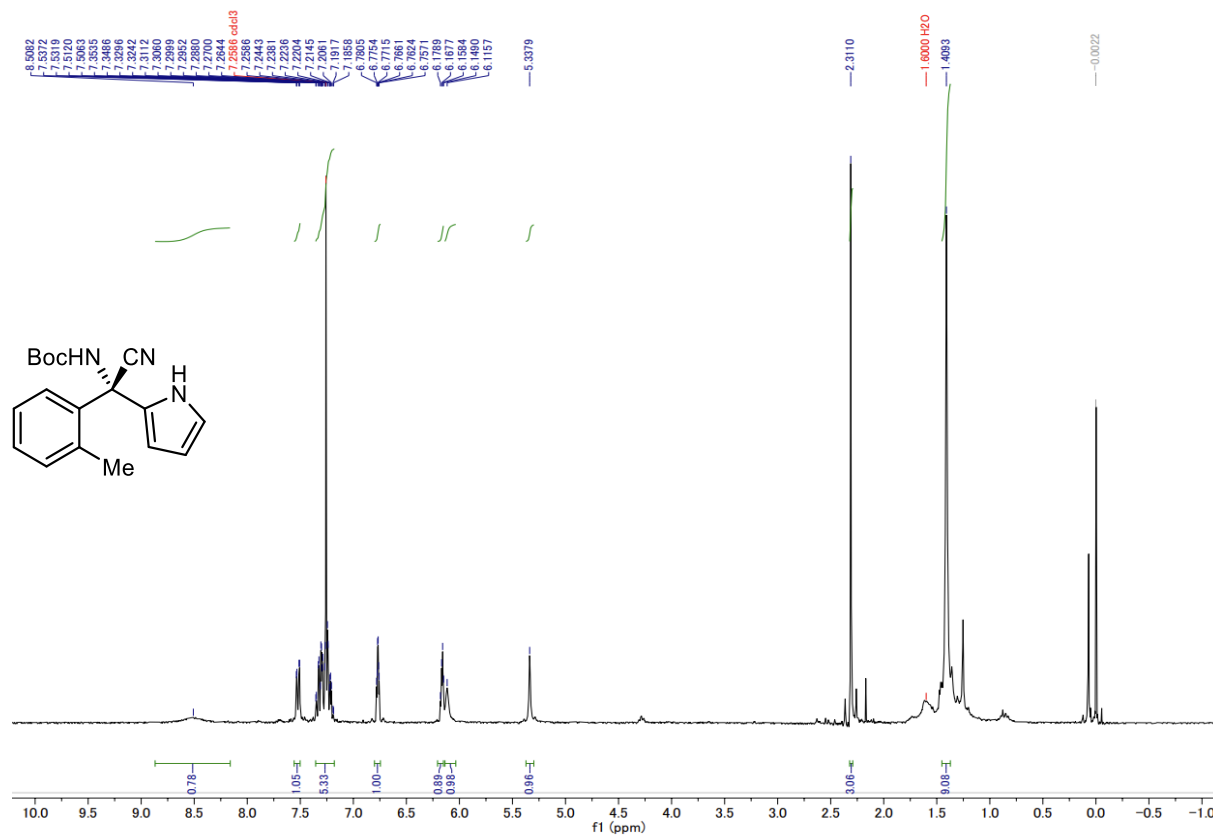

<sup>13</sup>C NMR (CDCl<sub>3</sub>, 125 MHz)

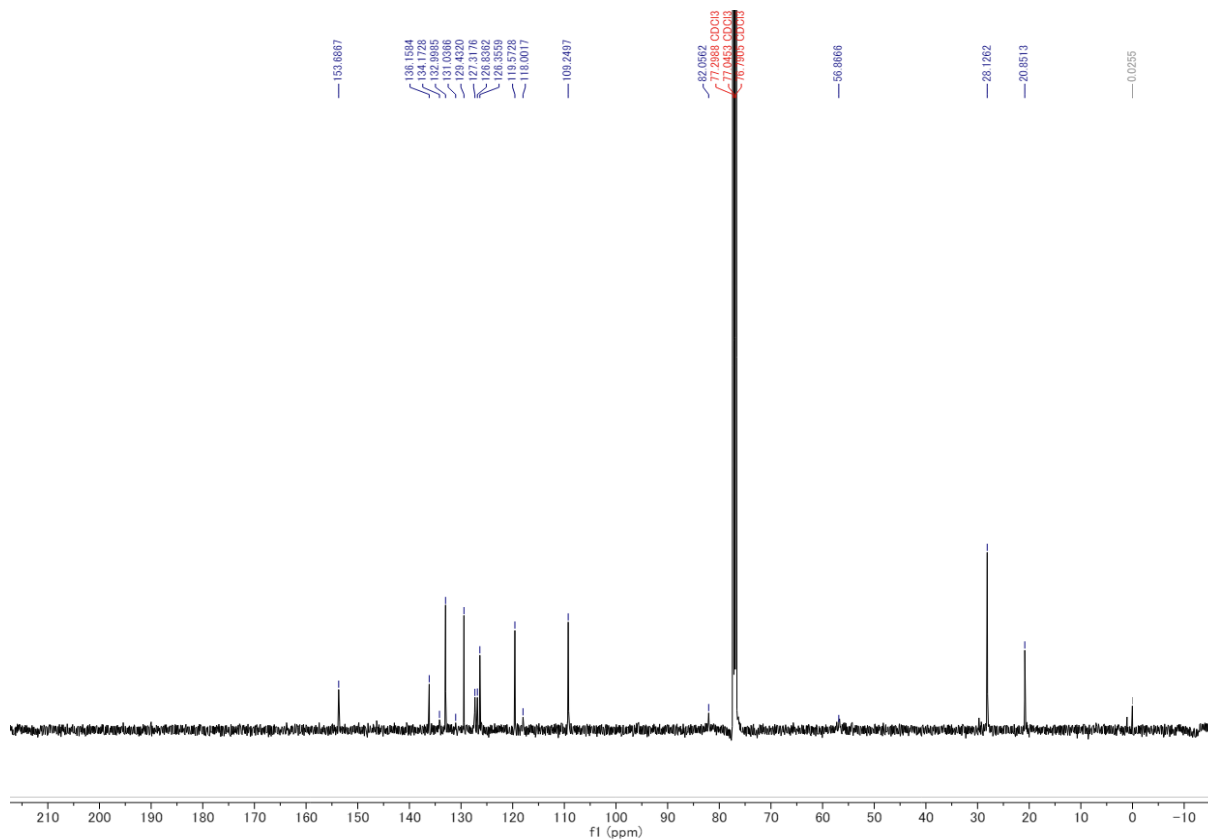

**(S)-2-(1-Naphtyl)-2-(1H-pyrrol-2-yl)-2-(tert-butoxycarbonylamino)acetonitrile (4la)**

$^1\text{H}$  NMR ( $\text{CDCl}_3$ , 300 MHz)

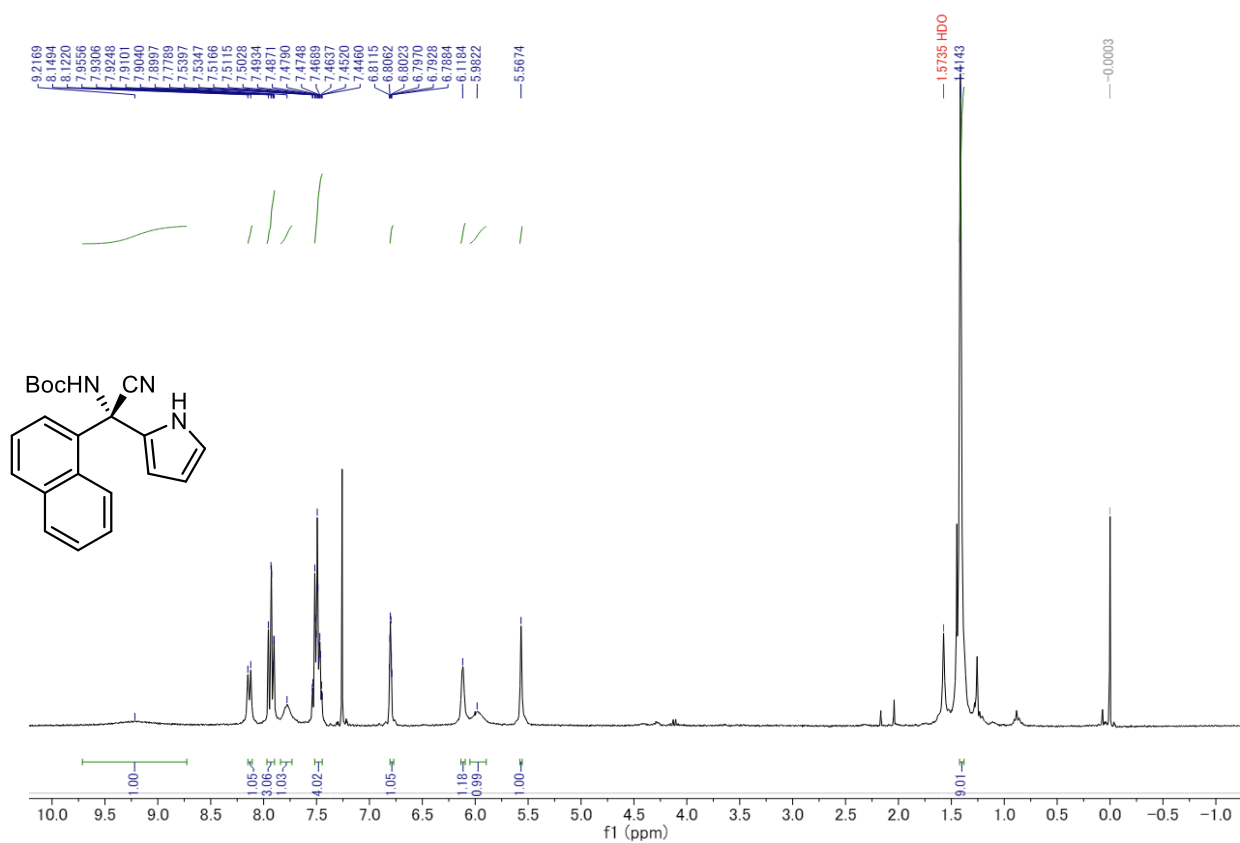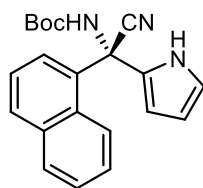

$^{13}\text{C}$  NMR ( $\text{CDCl}_3$ , 125 MHz)

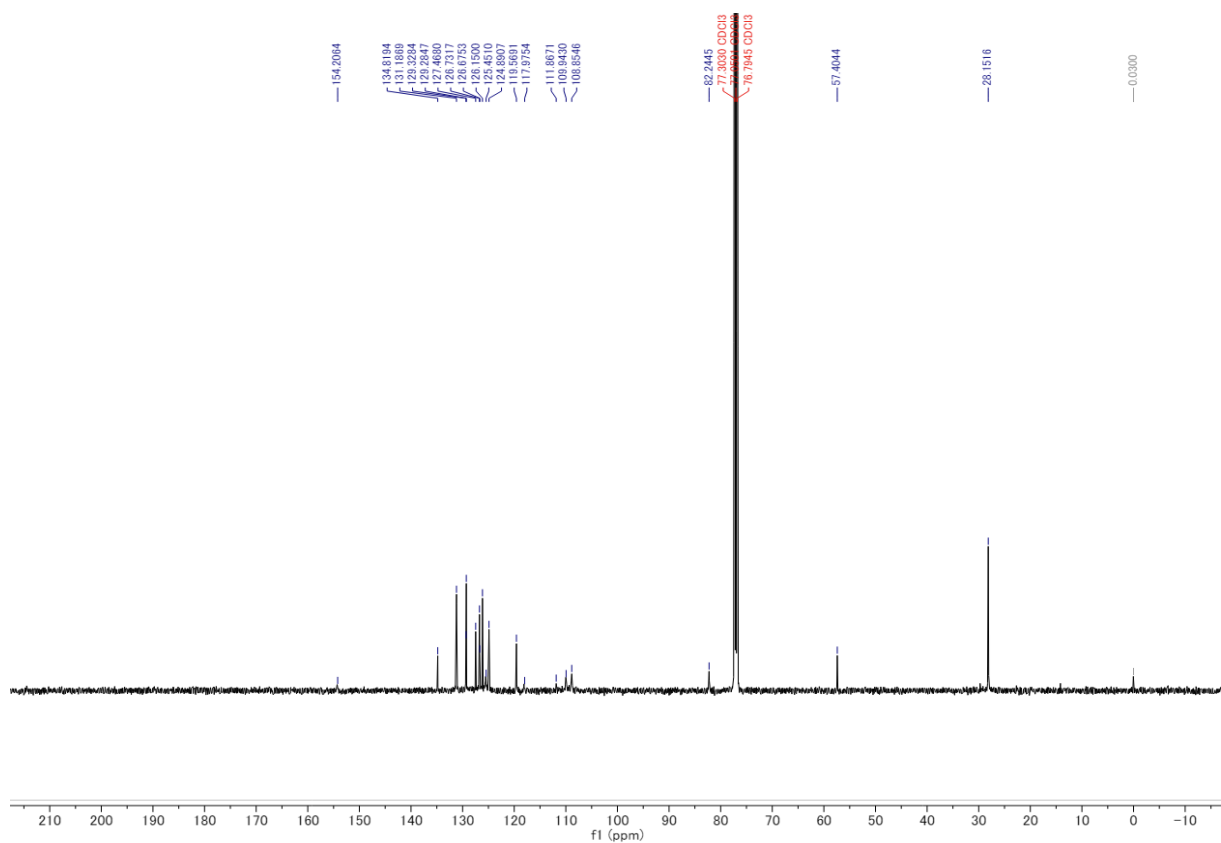

**(S)-2-(2-Naphtyl)-2-(1H-pyrrol-2-yl)-2-(tert-butoxycarbonylamino)acetonitrile (4ma)**

<sup>1</sup>H NMR (CDCl<sub>3</sub>, 300 MHz)

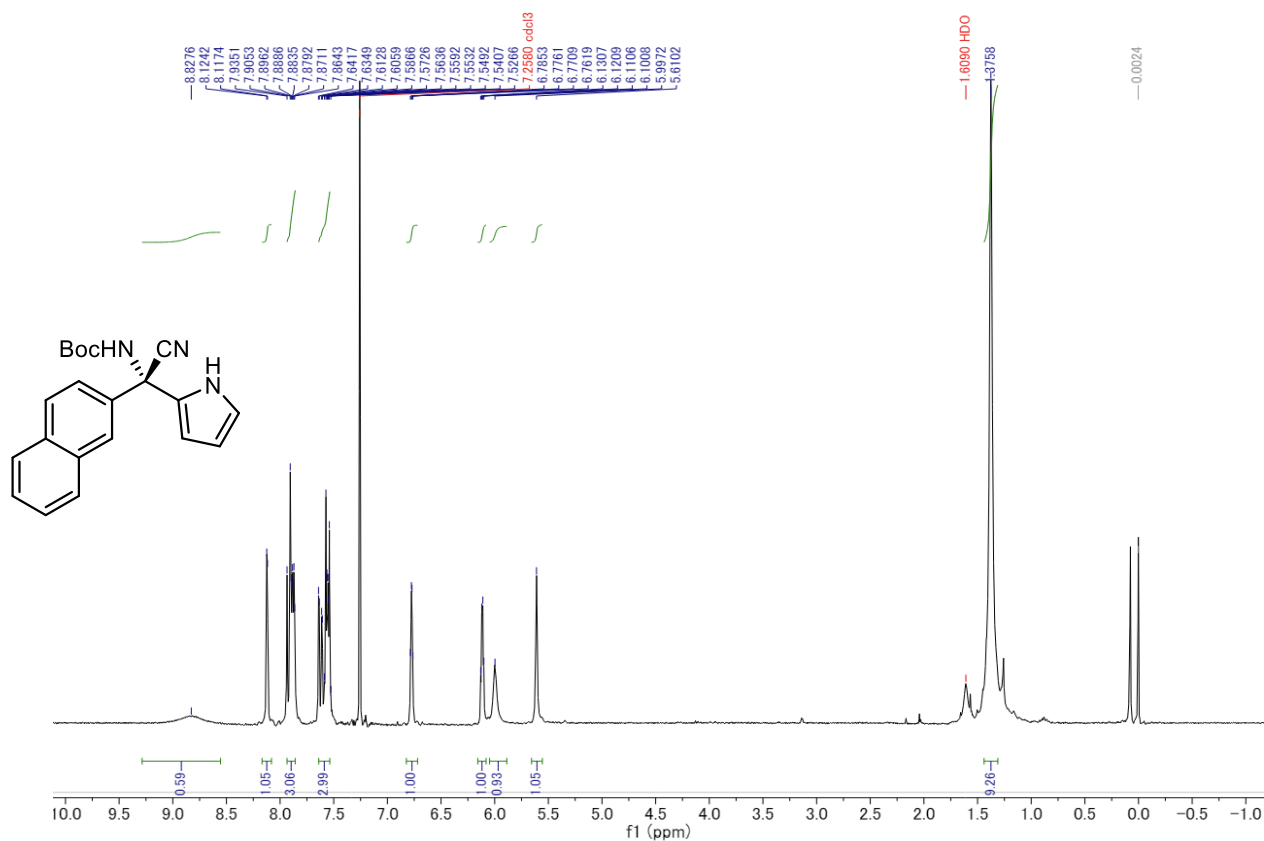

<sup>13</sup>C NMR (CDCl<sub>3</sub>, 125 MHz)

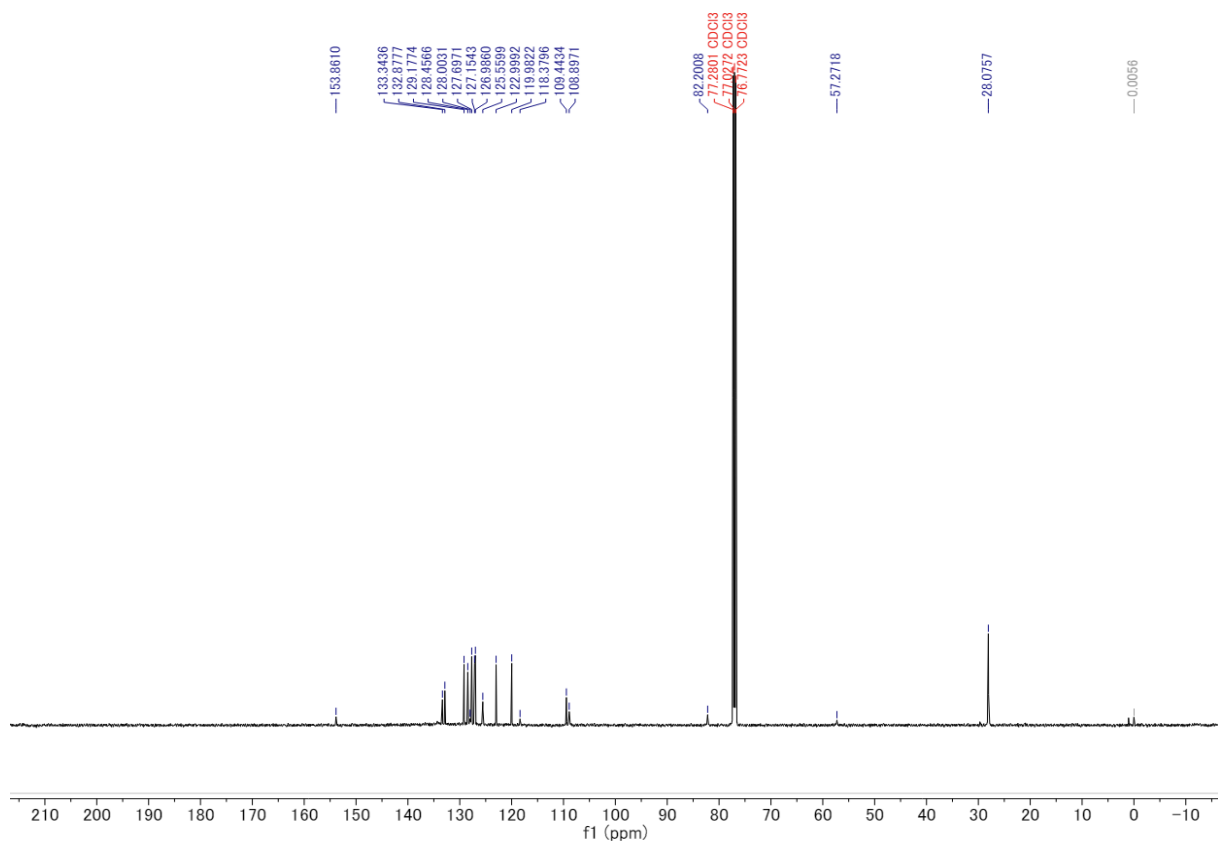

**(S)-2-(2-Furyl)-2-(1H-pyrrol-2-yl)-2-(tert-butoxycarbonylamino)acetonitrile (4na)**

<sup>1</sup>H NMR (CDCl<sub>3</sub>, 400 MHz)

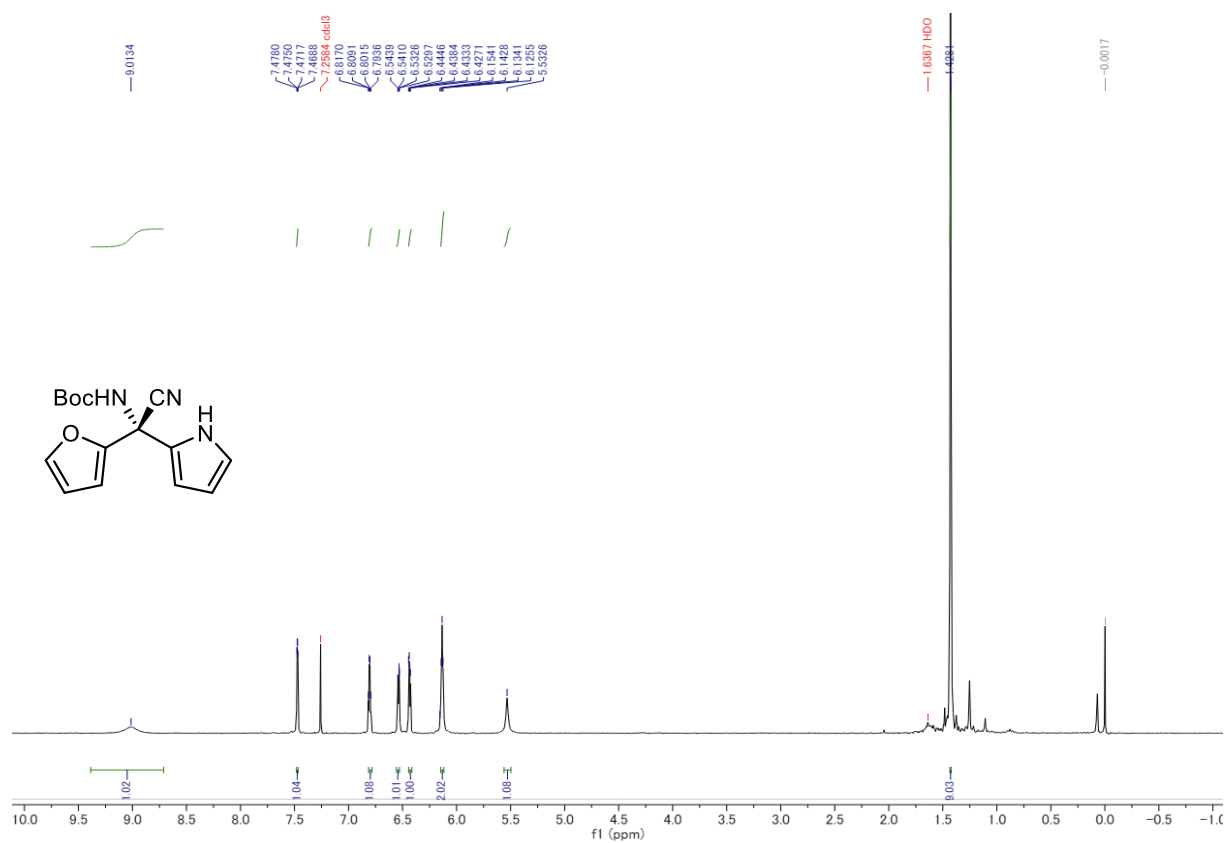

<sup>13</sup>C NMR (CDCl<sub>3</sub>, 125 MHz)

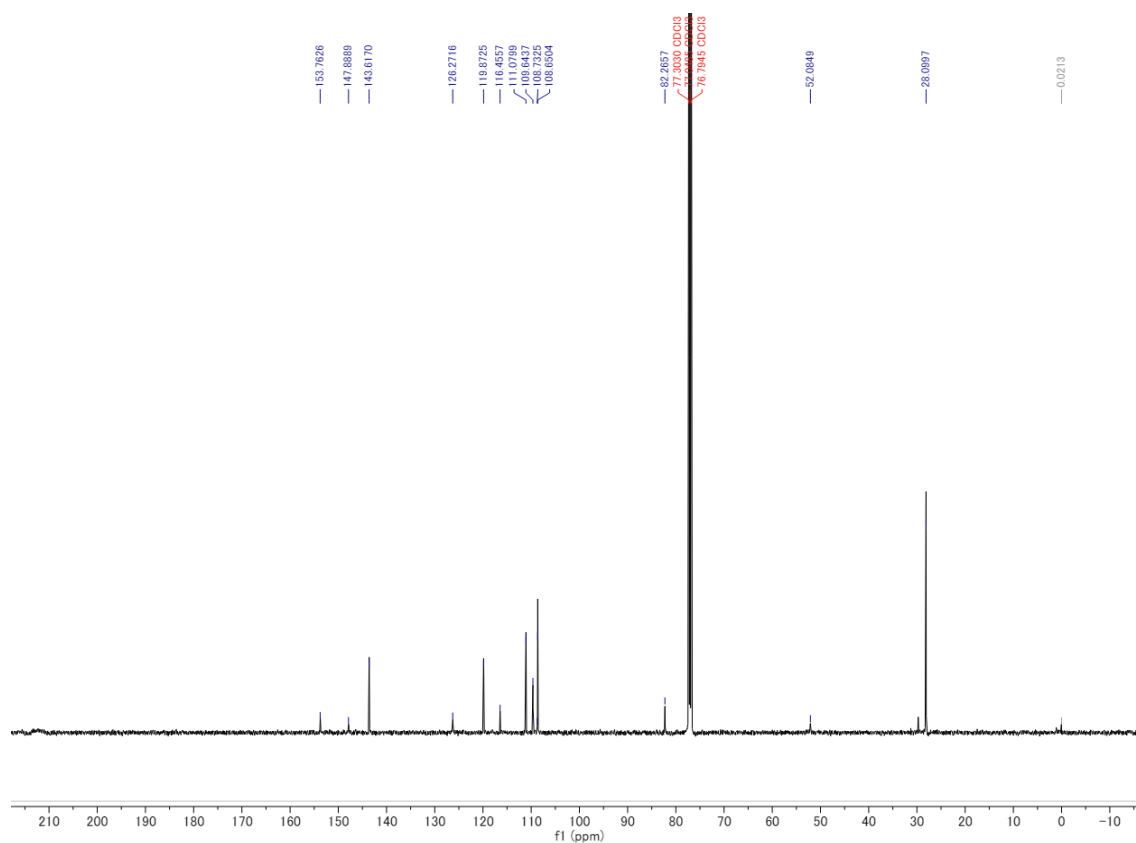

**(S)-2-(2-Thienyl)-2-(1H-pyrrol-2-yl)-2-(tert-butoxycarbonylamino)acetonitrile (40a)**

$^1\text{H}$  NMR ( $\text{CDCl}_3$ , 300 MHz)

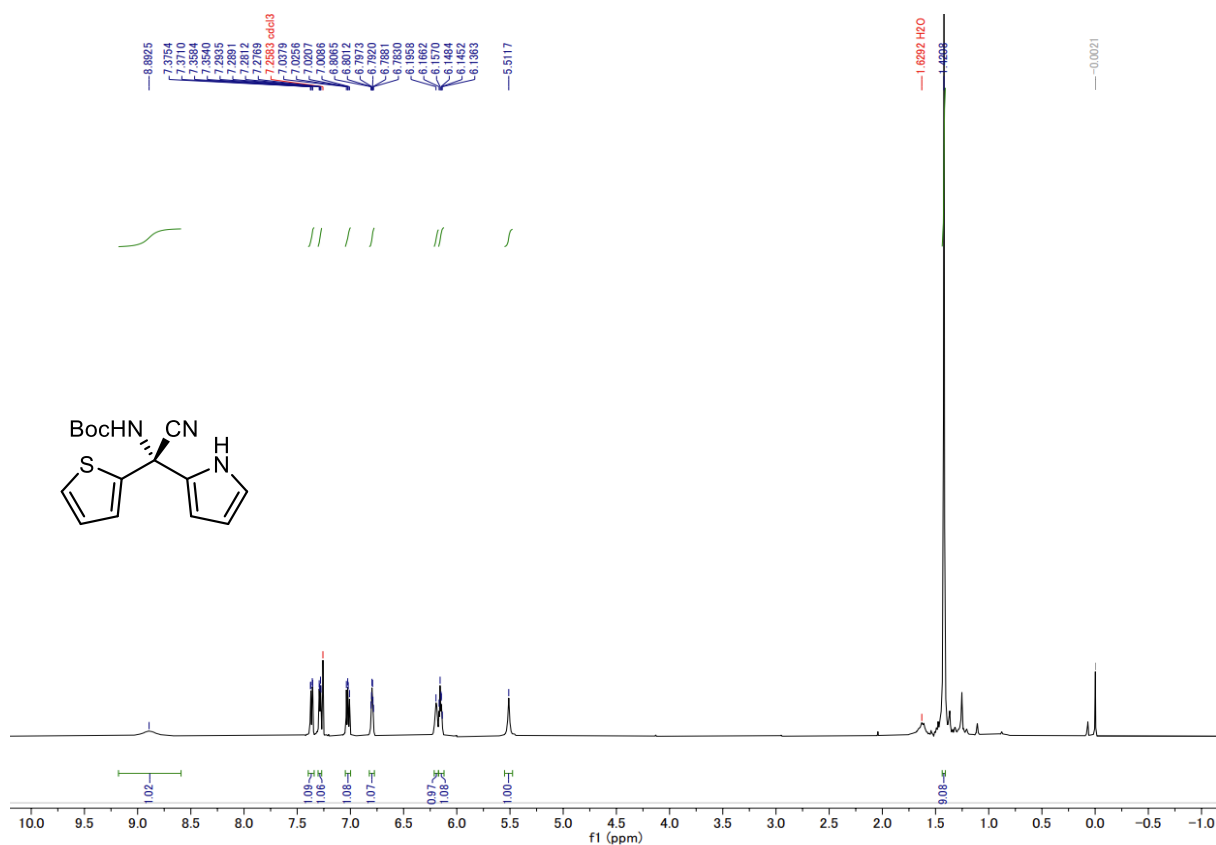

$^{13}\text{C}$  NMR ( $\text{CDCl}_3$ , 125 MHz)

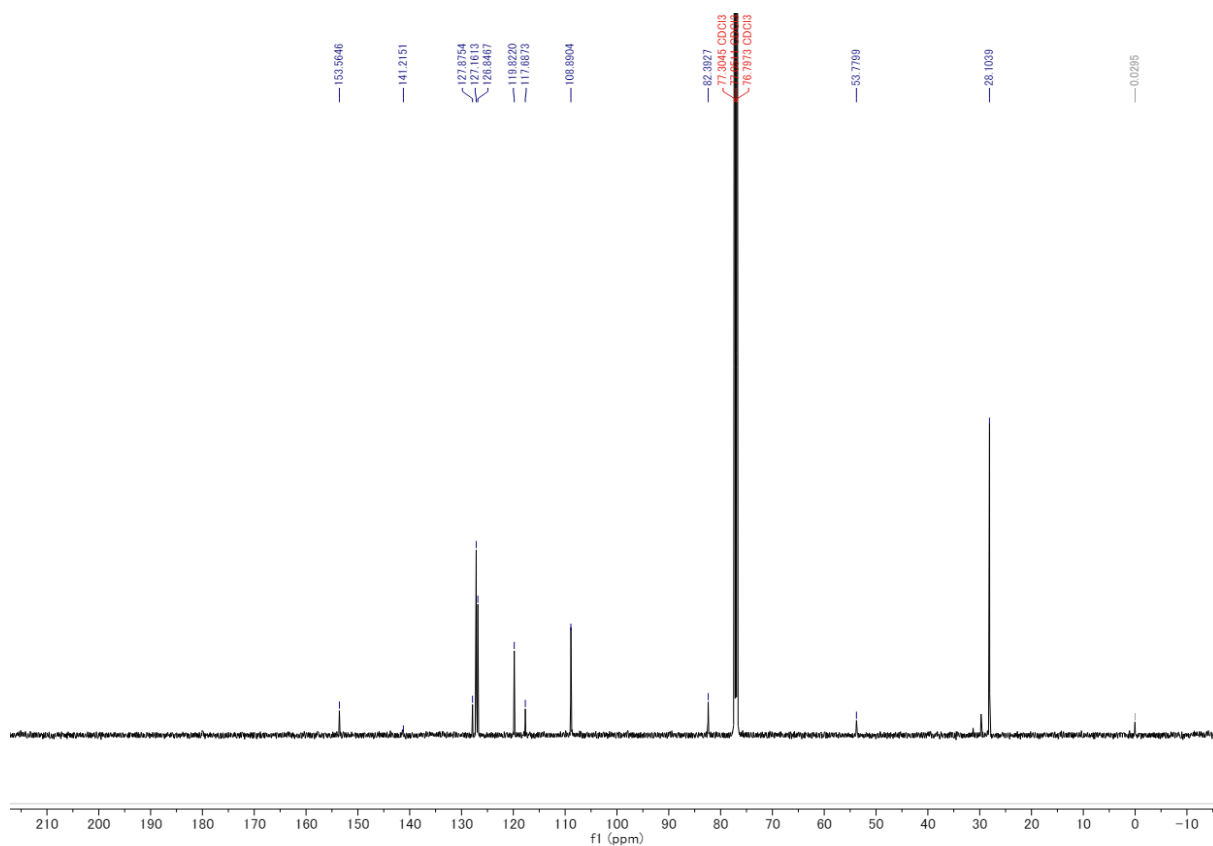

**(S)-2-Phenyl-2-(5-ethyl-1H-pyrrol-2-yl)-2-(tert-butoxycarbonylamino)acetonitrile (4ab)**

$^1\text{H}$  NMR ( $\text{CDCl}_3$ , 300 MHz)

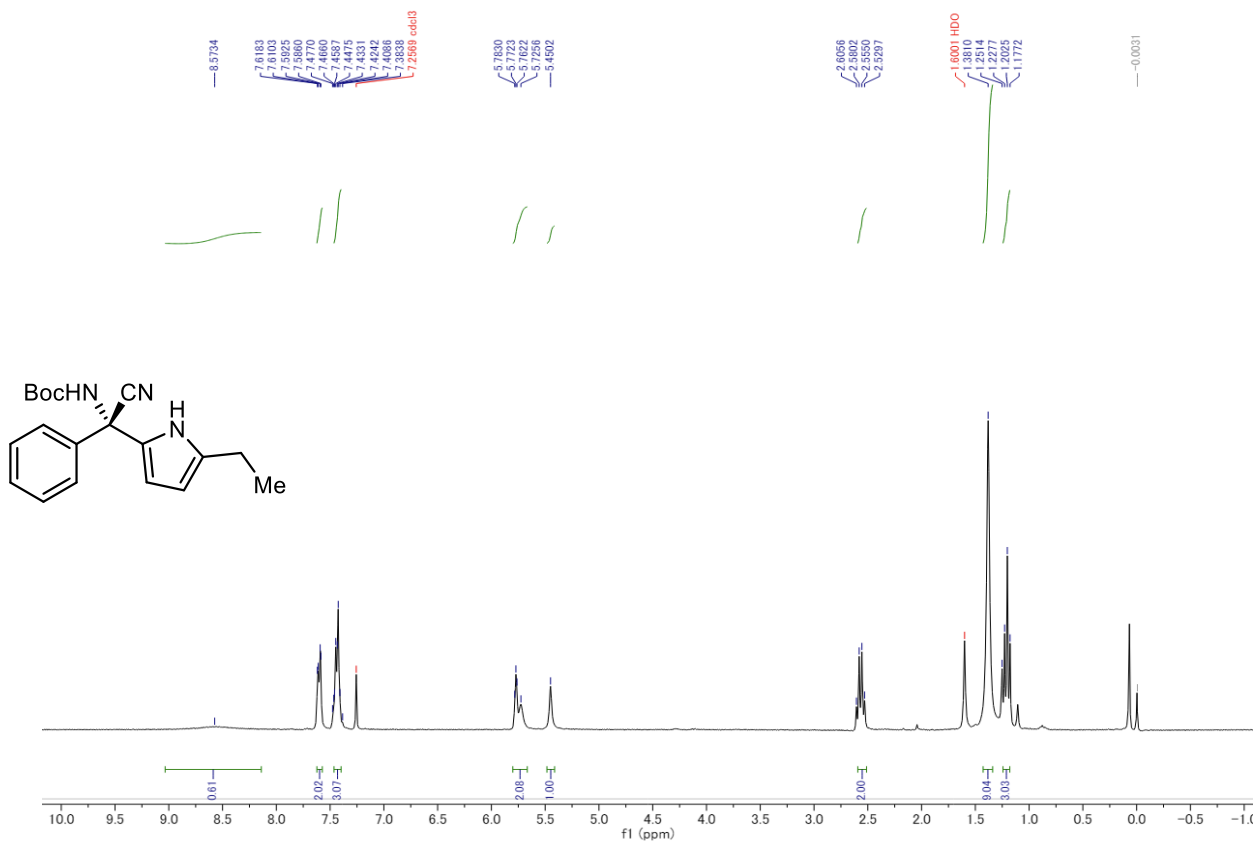

$^{13}\text{C}$  NMR ( $\text{CDCl}_3$ , 125 MHz)

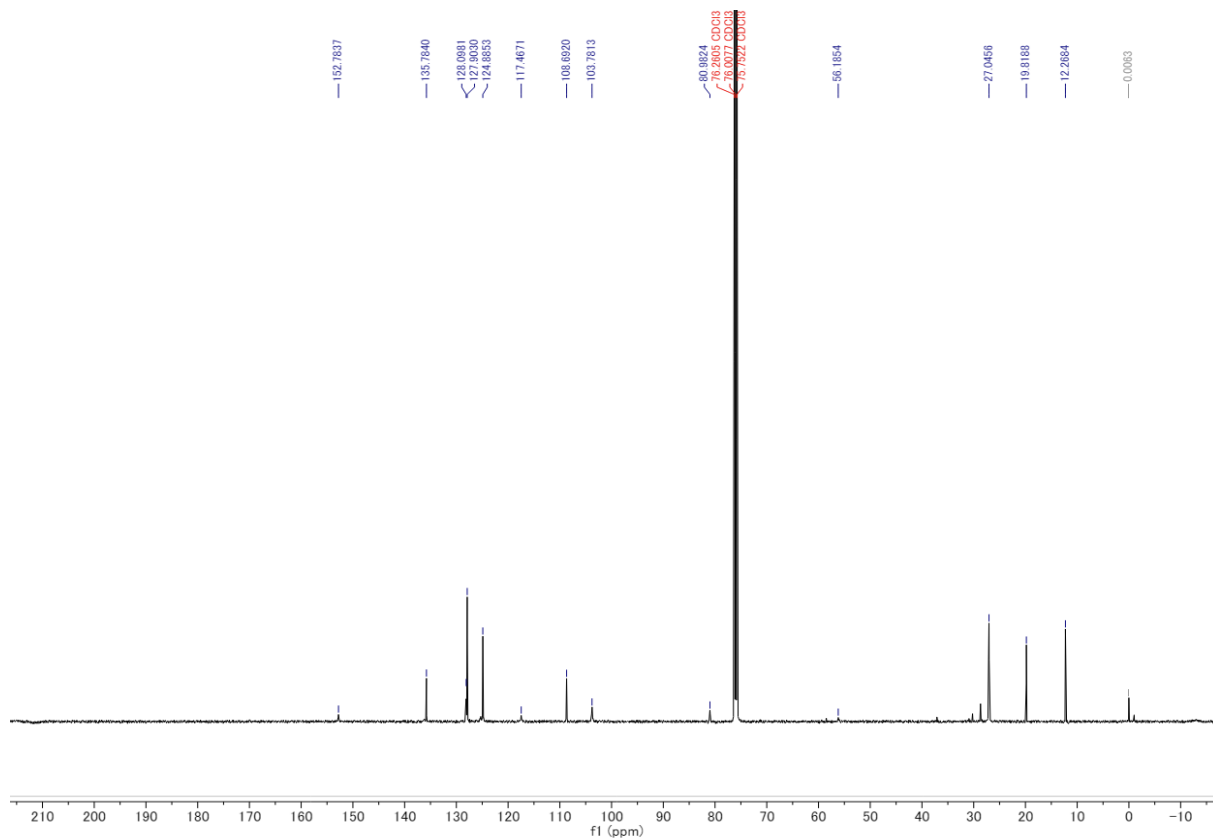



**(S)-2-Phenyl-2-(5-phenyl-1H-pyrrol-2-yl)-2-(tert-butoxycarbonylamino)acetonitrile (4ac)**

$^1\text{H}$  NMR ( $\text{CDCl}_3$ , 300 MHz)

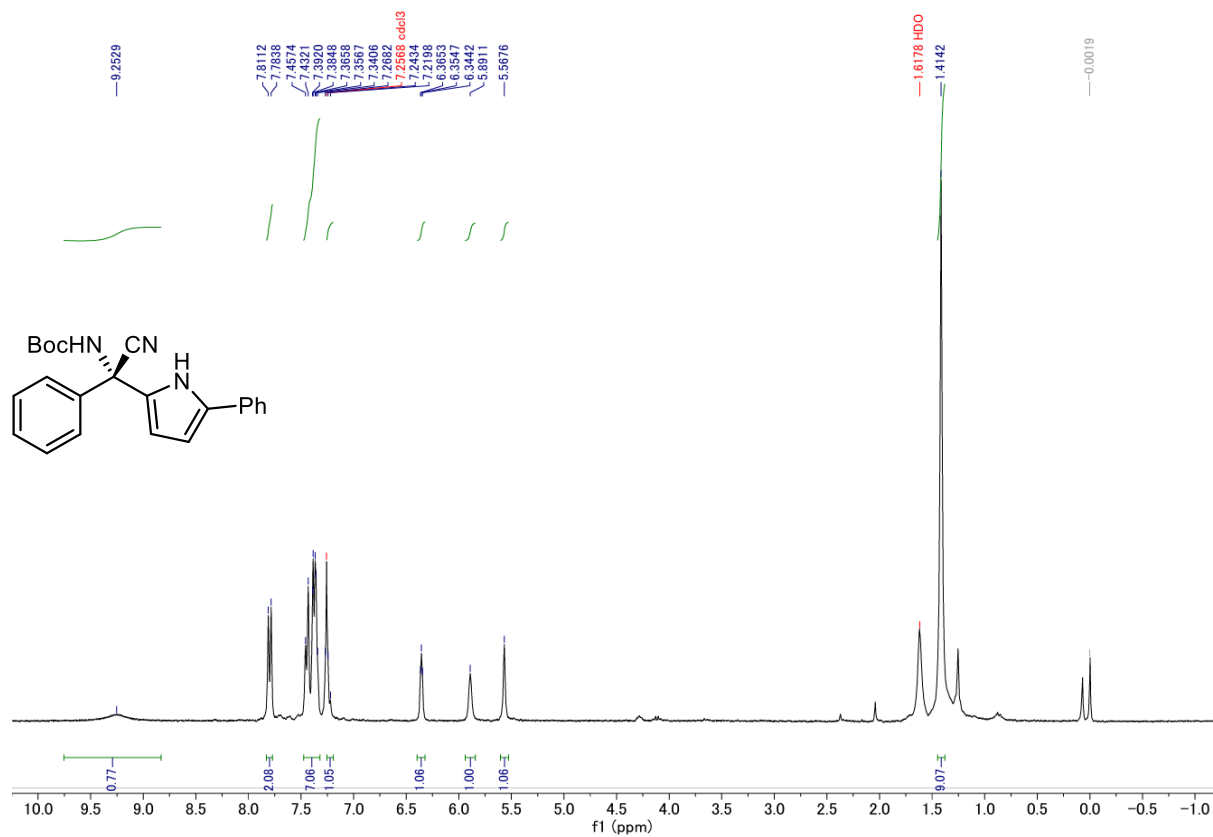

$^{13}\text{C}$  NMR ( $\text{CDCl}_3$ , 125 MHz)

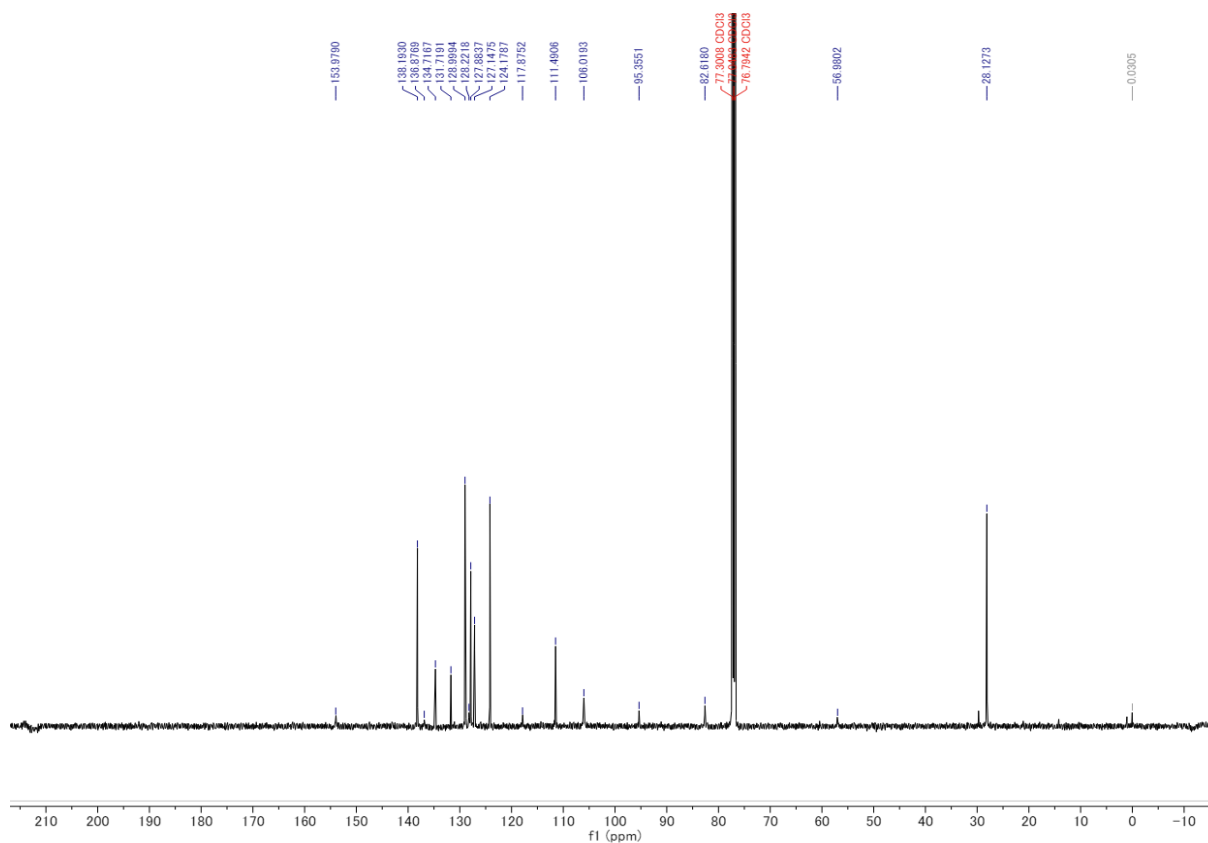

**(S)-2-Phenyl-2-(3,5-dimethyl-1H-pyrrol-2-yl)-2-(tert-butoxycarbonylamino)acetonitrile (4ad)**

$^1\text{H}$  NMR ( $\text{CDCl}_3$ , 300 MHz)

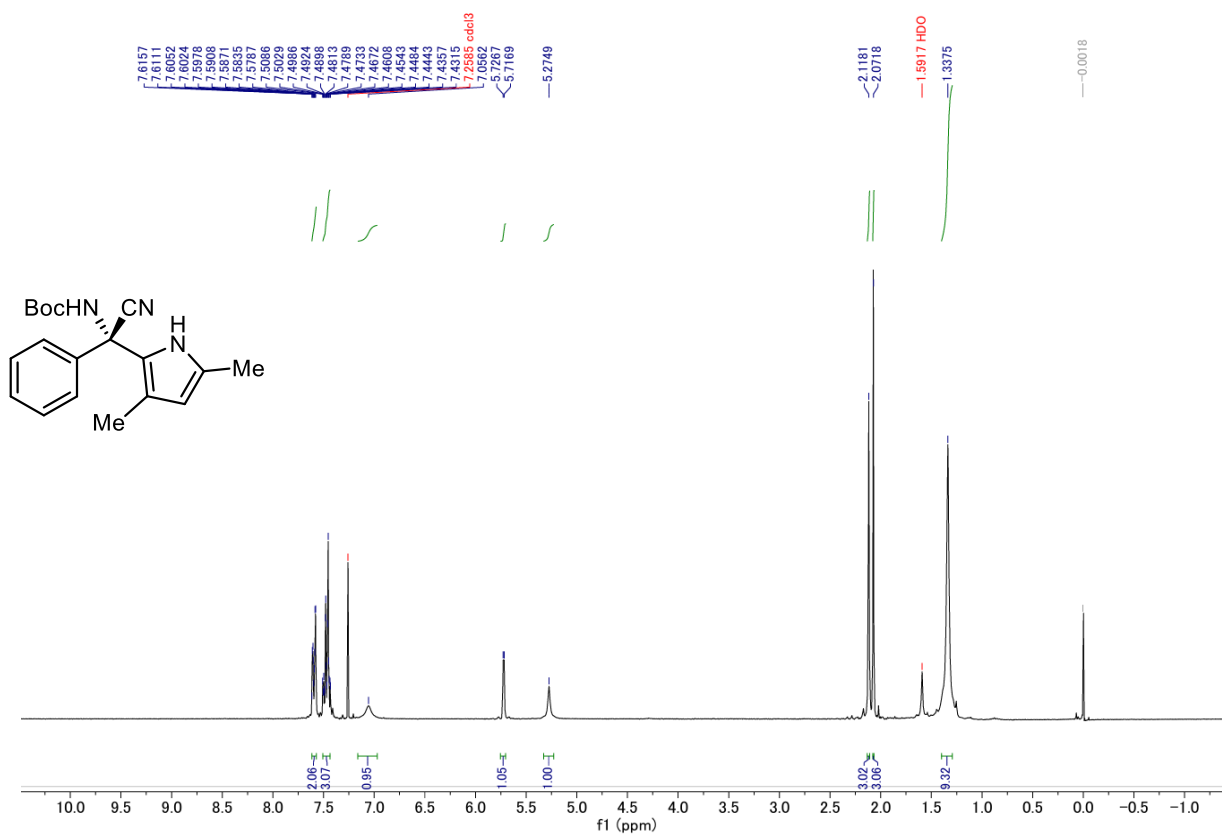

$^{13}\text{C}$  NMR ( $\text{CDCl}_3$ , 125 MHz)

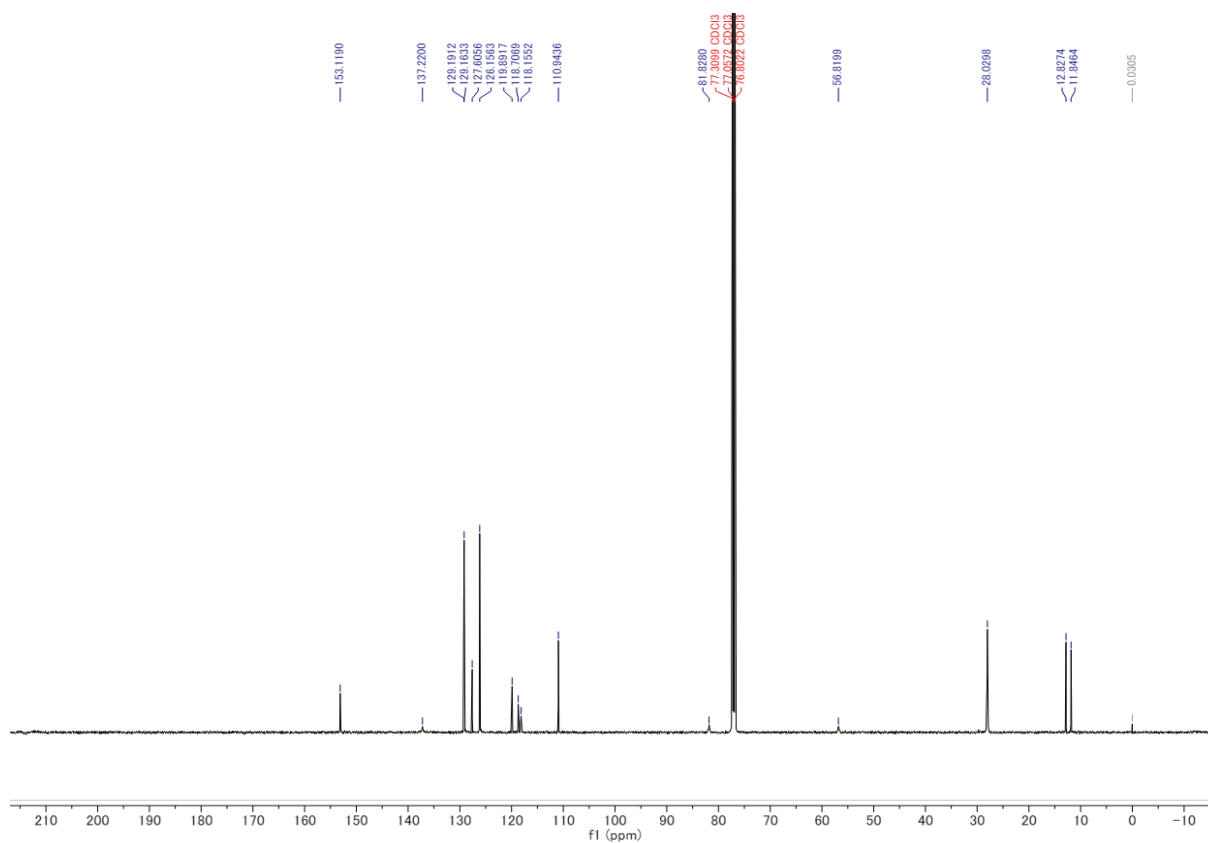

**(S)-2-Phenyl-2-(2,5-dimethyl-1H-pyrrol-3-yl)-2-(tert-butoxycarbonylamino)acetonitrile (4ae)**

<sup>1</sup>H NMR (CDCl<sub>3</sub>, 300 MHz)

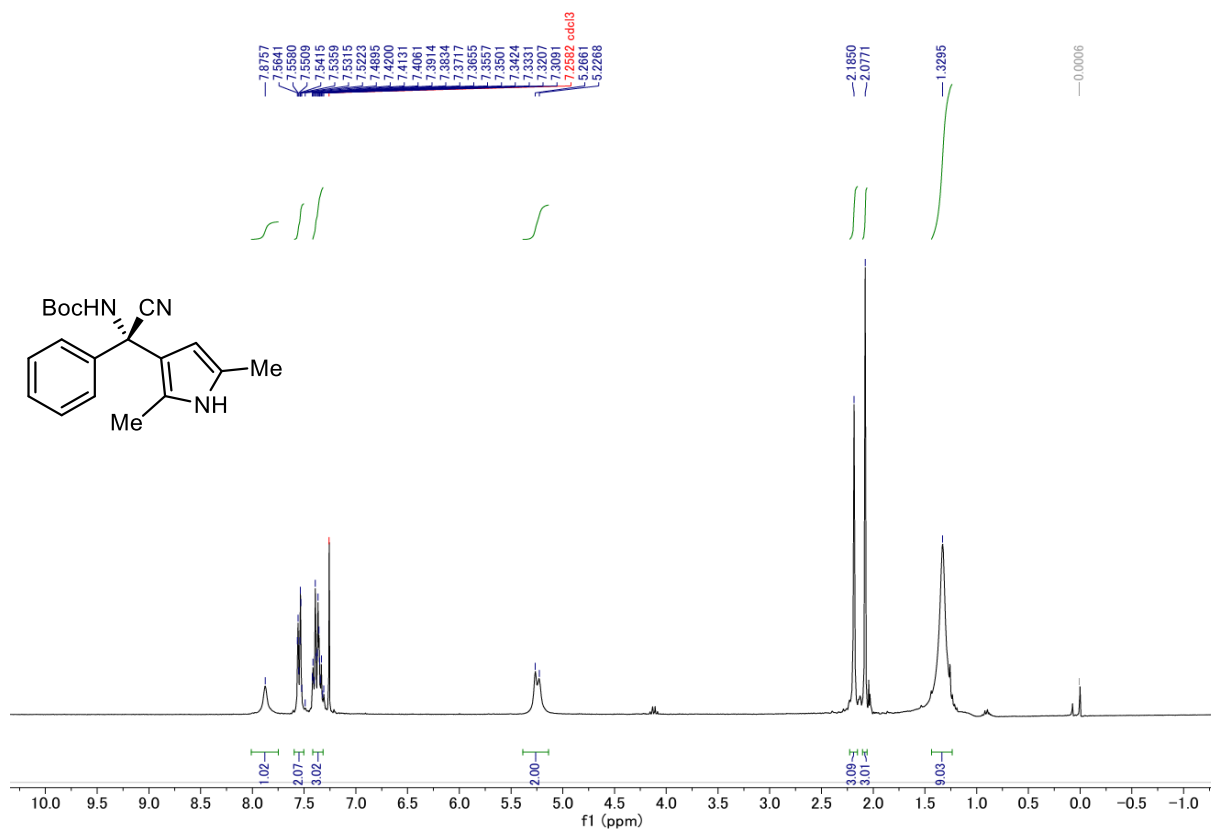

<sup>13</sup>C NMR (CDCl<sub>3</sub>, 125 MHz)

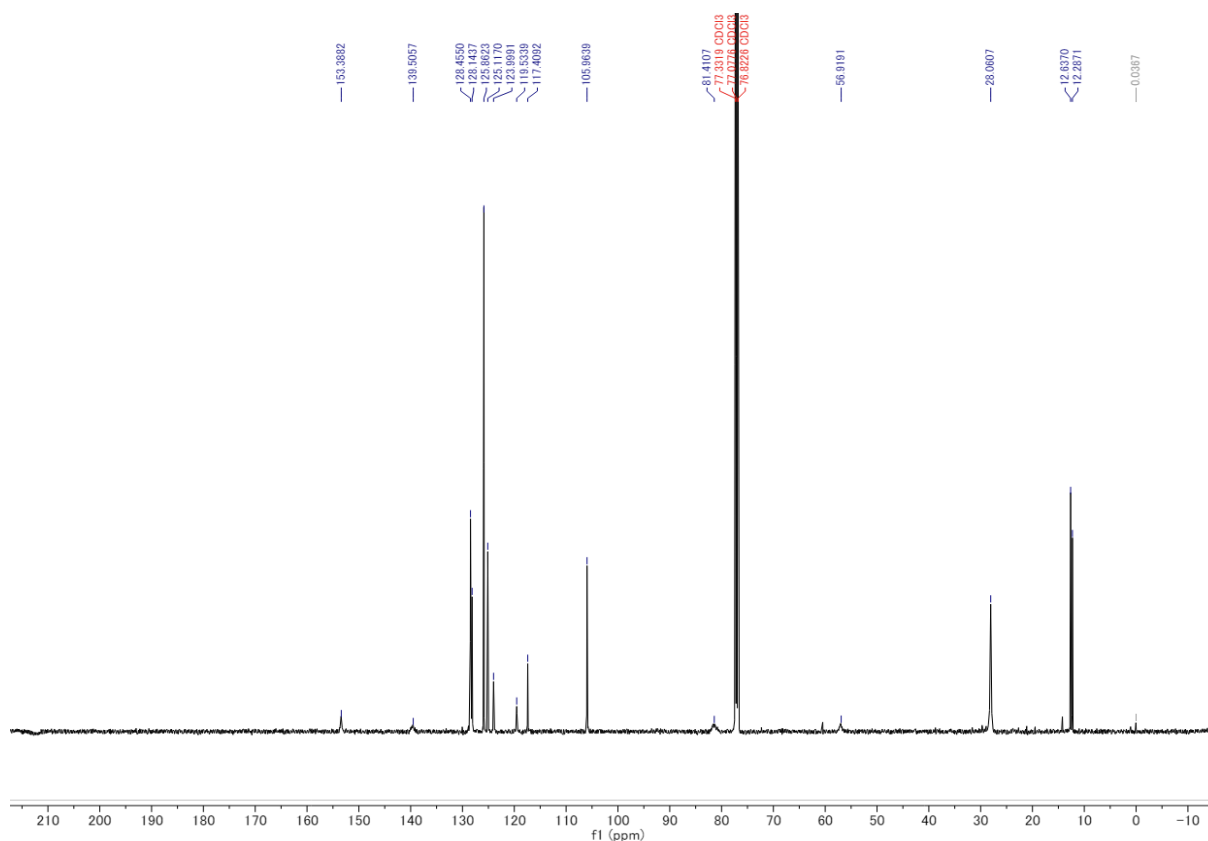

**(R)-2-(1H-Indol-3-yl)-2-phenyl-2-(tert-butoxycarbonylamino)acetonitrile (6aa)**

<sup>1</sup>H NMR (CDCl<sub>3</sub>, 300 MHz)

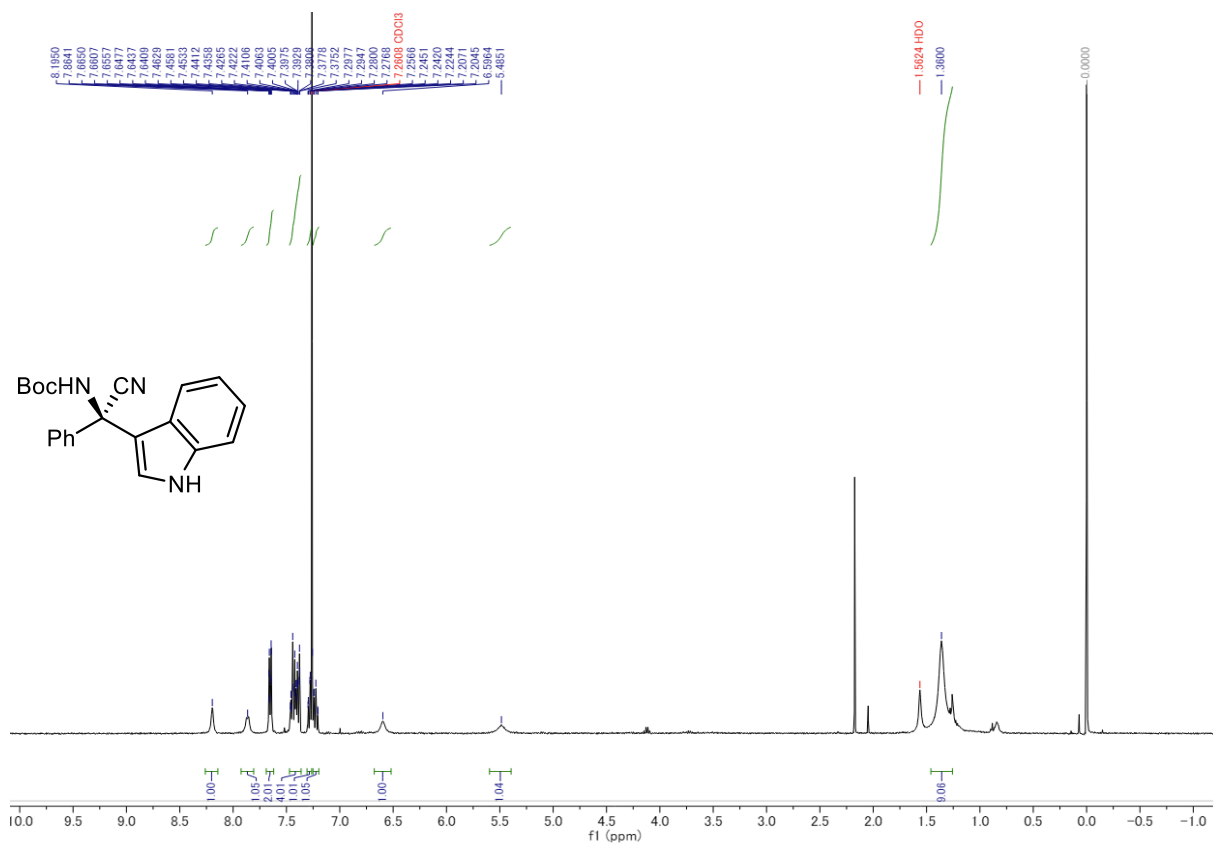

<sup>13</sup>C NMR (CDCl<sub>3</sub>, 125 MHz)

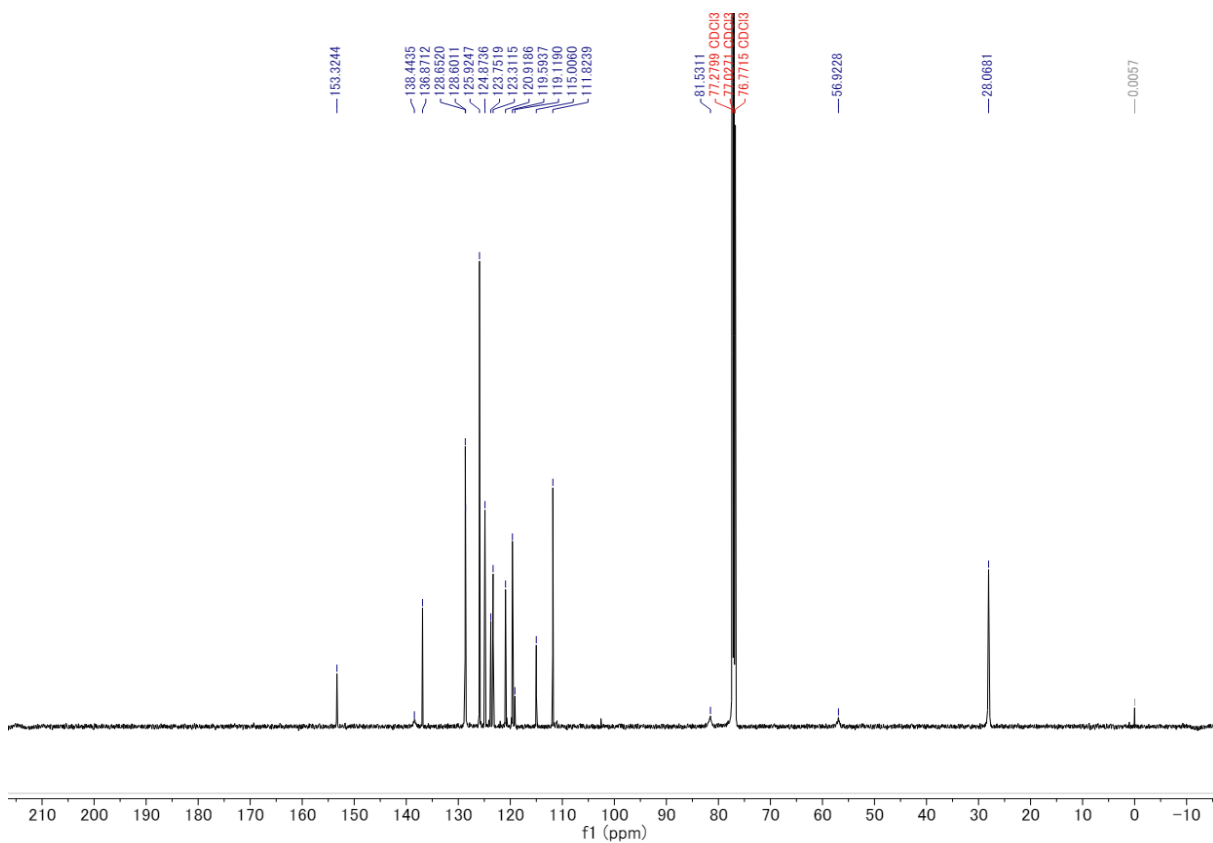

**(R)-2-(1H-Indol-3-yl)-2-(4-bromophenyl)-2-(tert-butoxycarbonylamino)acetonitrile (6ba)**

<sup>1</sup>H NMR (CDCl<sub>3</sub>, 300 MHz)

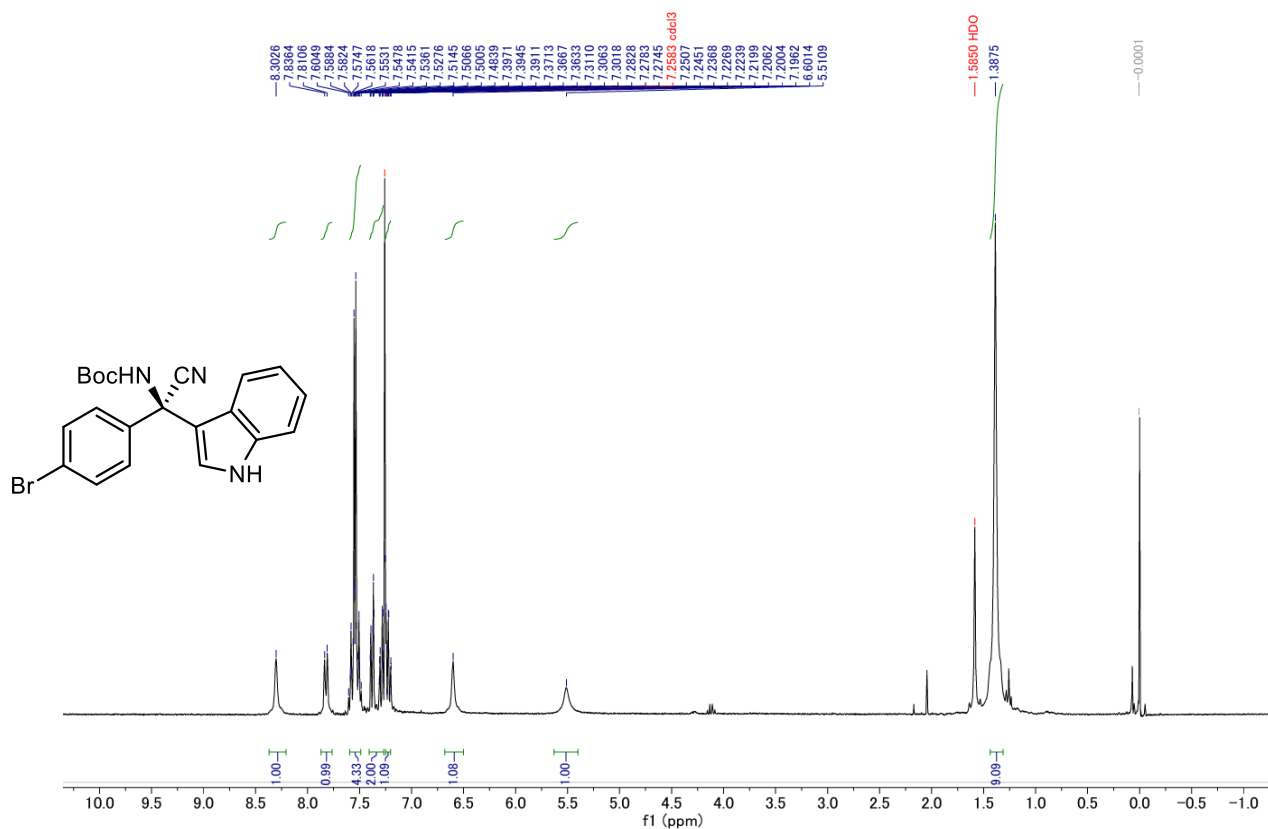

<sup>13</sup>C NMR (CDCl<sub>3</sub>, 125 MHz)

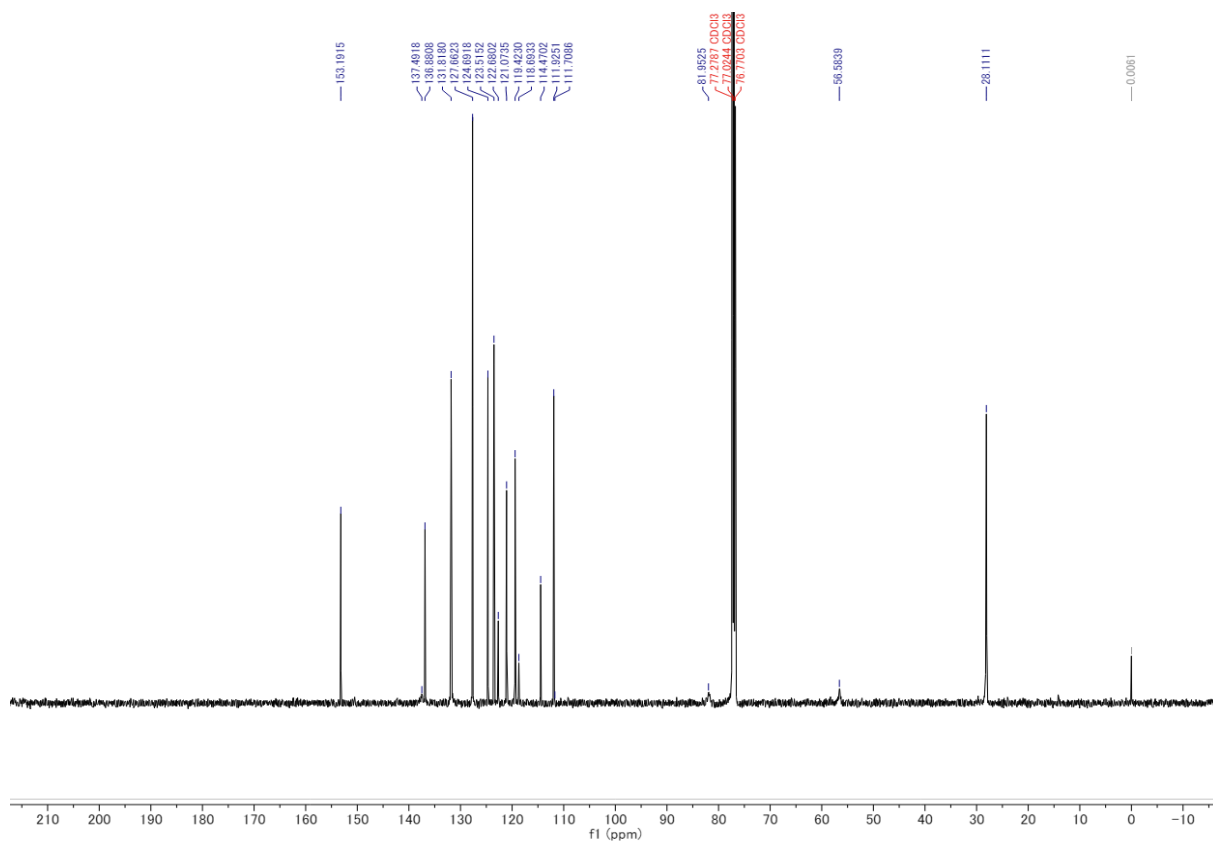

**(R)-2-(1H-Indol-3-yl)-2-(4-methylphenyl)-2-(tert-butoxycarbonylamino)acetonitrile (6ca)**

<sup>1</sup>H NMR (CDCl<sub>3</sub>, 300 MHz)

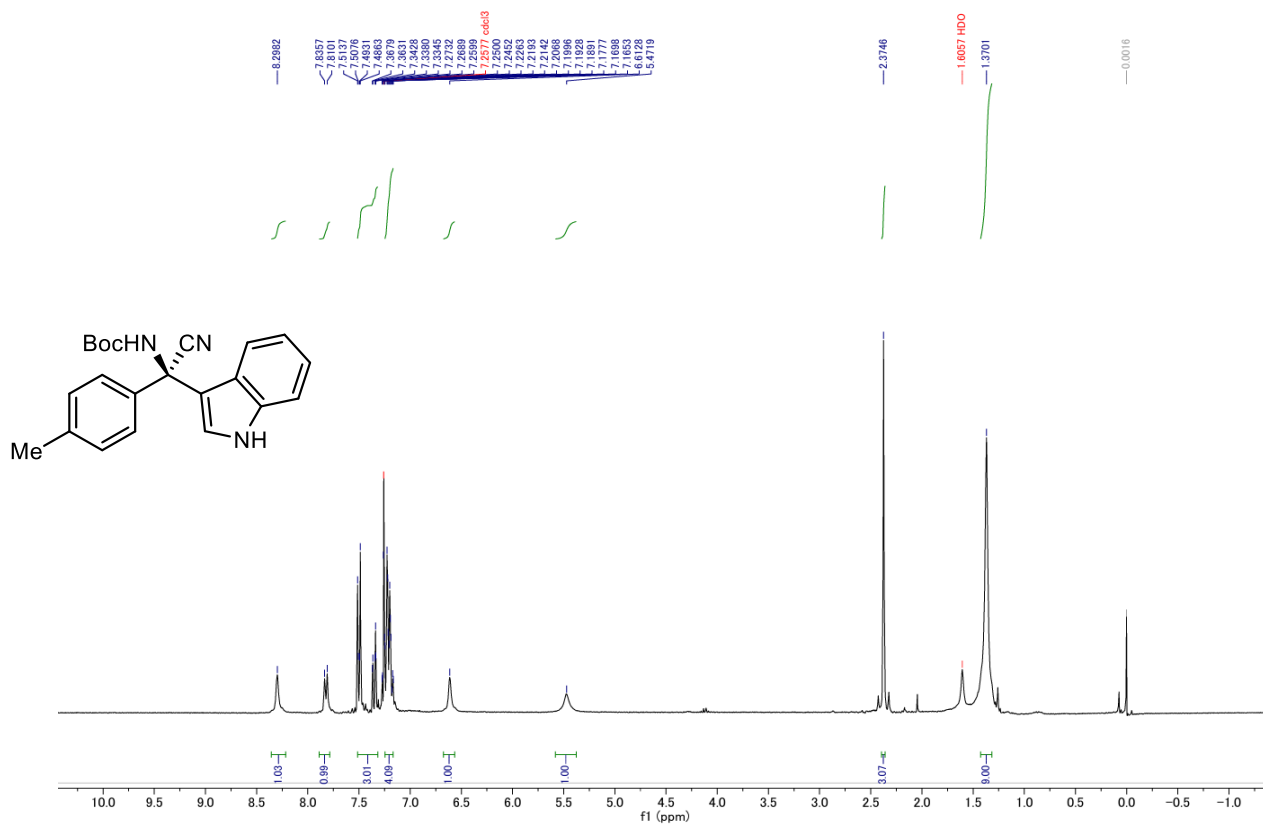

<sup>13</sup>C NMR (CDCl<sub>3</sub>, 125 MHz)

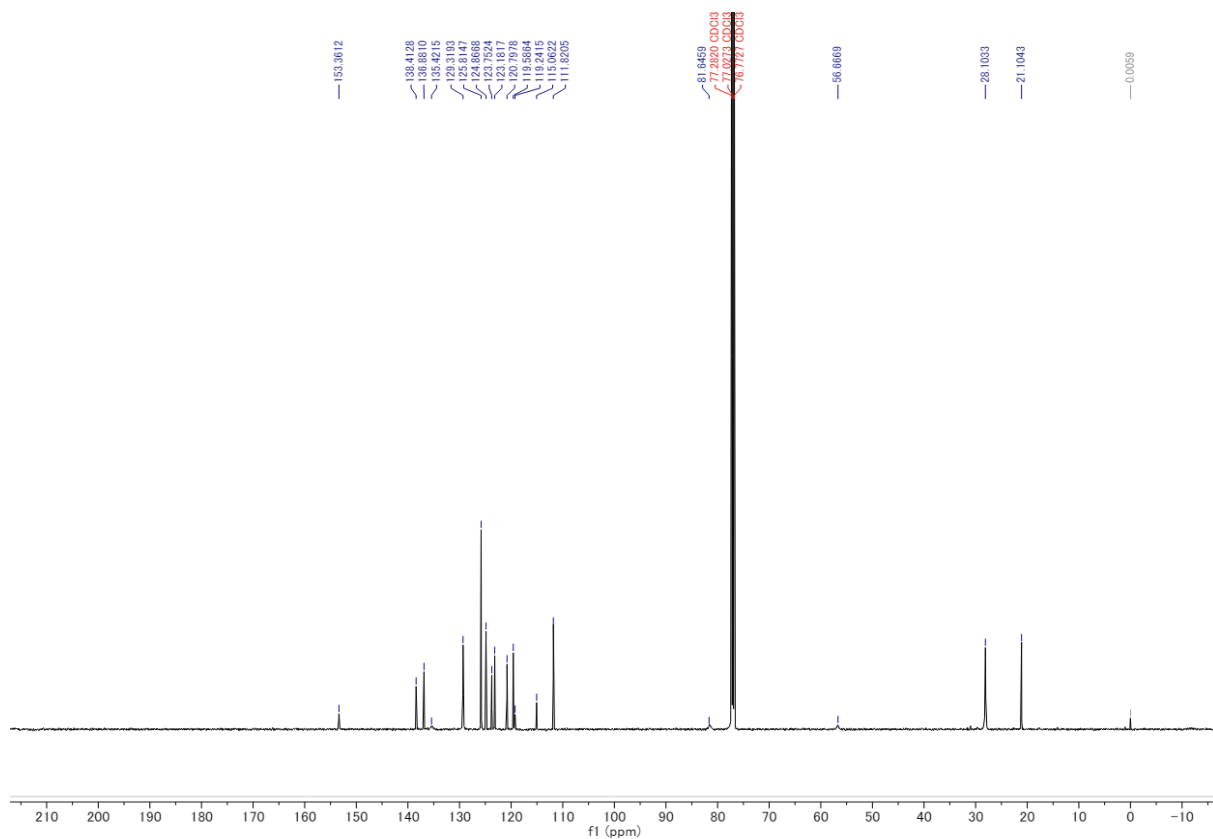

**(R)-2-(1H-Indol-3-yl)-2-(2-thienyl)-2-(tert-butoxycarbonylamino)acetonitrile (6da)**

<sup>1</sup>H NMR (CDCl<sub>3</sub>, 300 MHz)

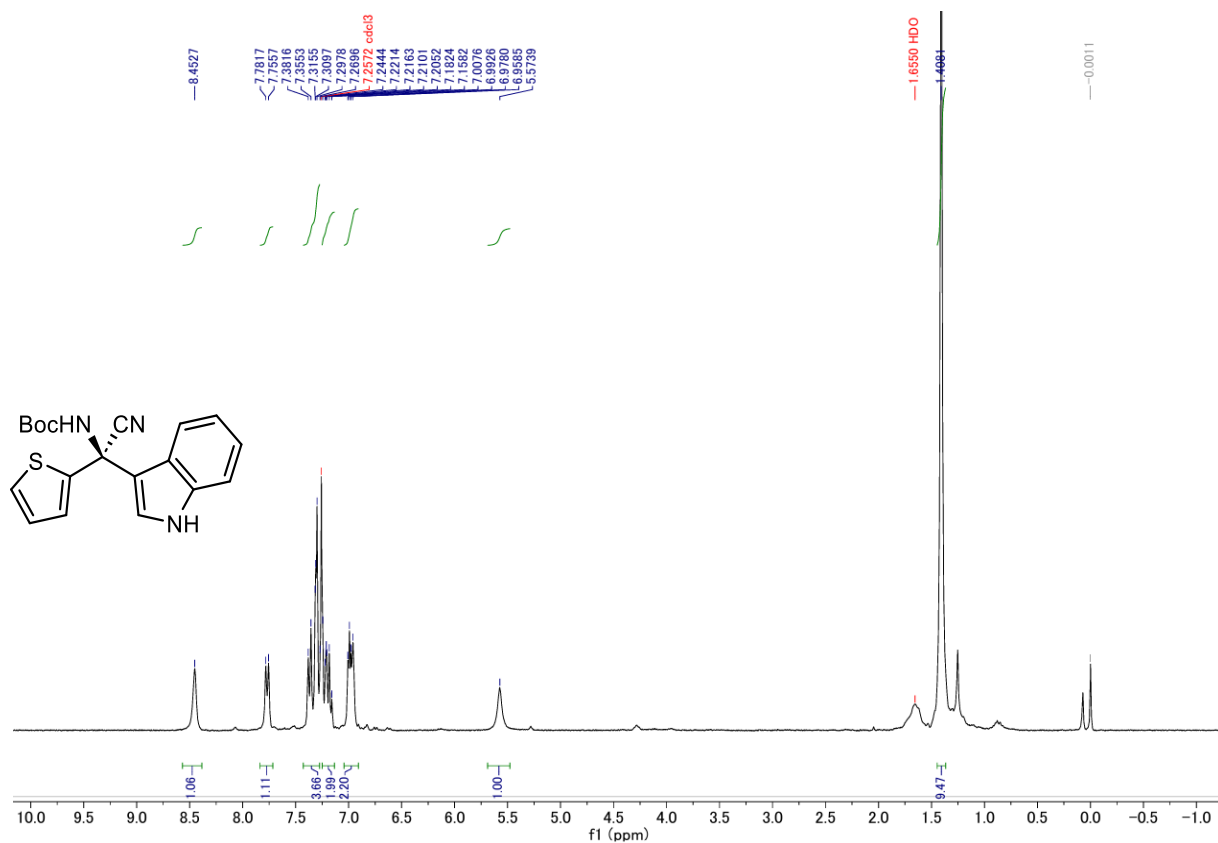

<sup>13</sup>C NMR (CDCl<sub>3</sub>, 125 MHz)

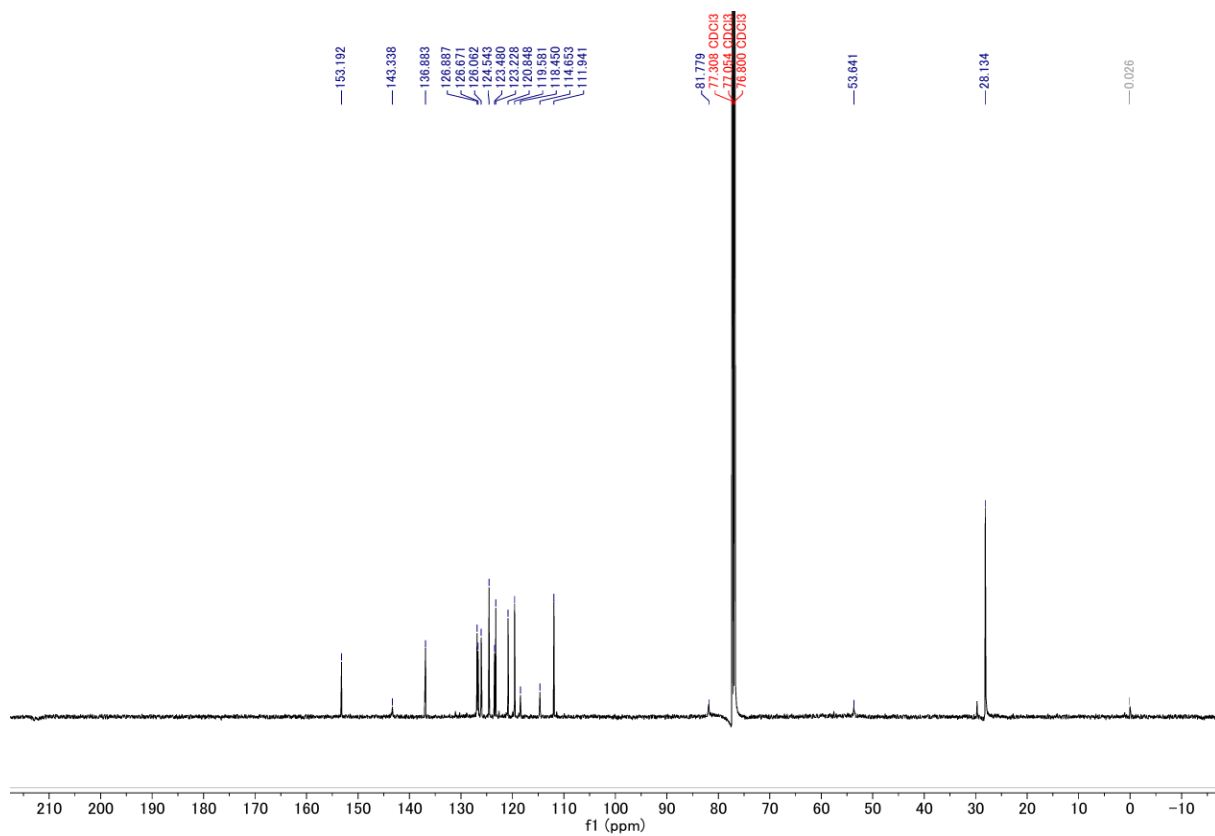

**(R)-2-(1H-Indol-3-yl)-2-(1-naphthyl)-2-(tert-butoxycarbonylamino)acetonitrile (6ea)**

<sup>1</sup>H NMR (CDCl<sub>3</sub>, 300 MHz)

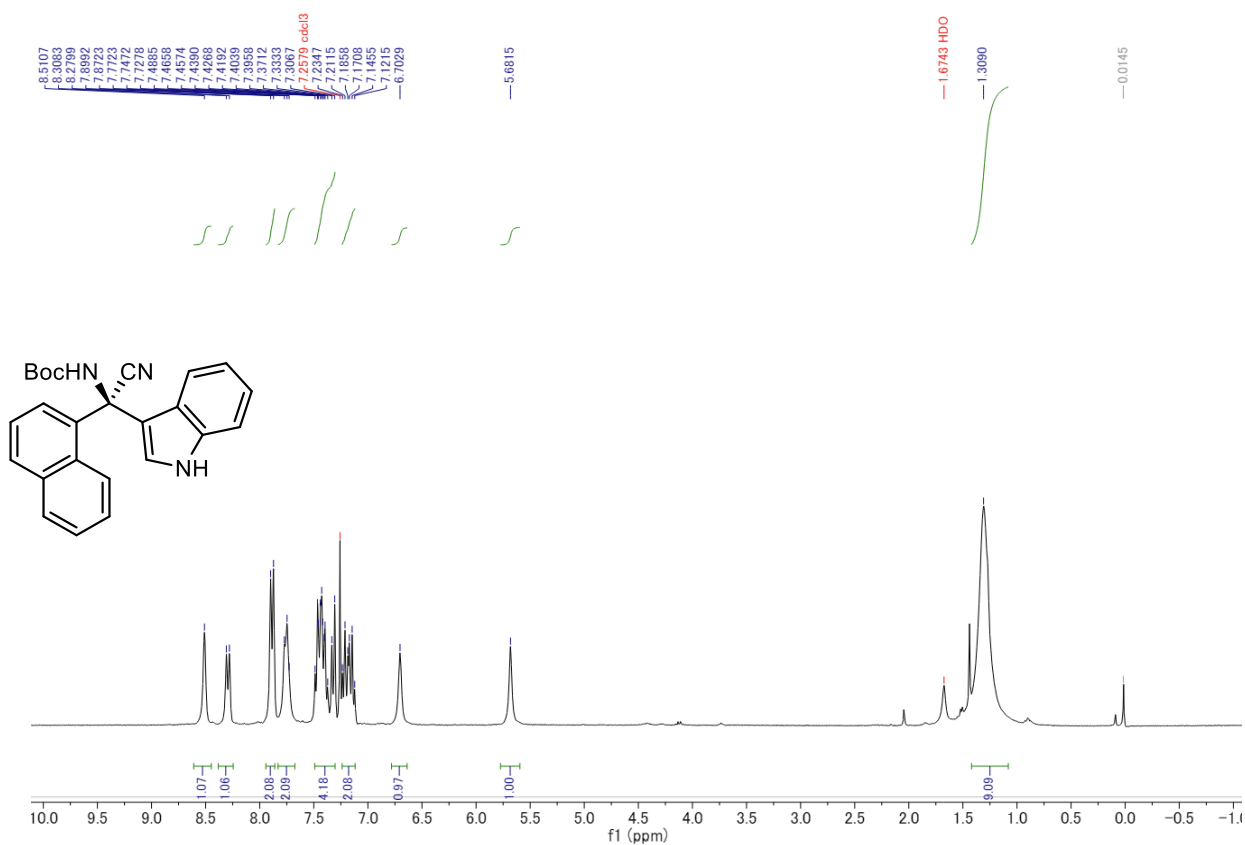

<sup>13</sup>C NMR (CDCl<sub>3</sub>, 125 MHz)

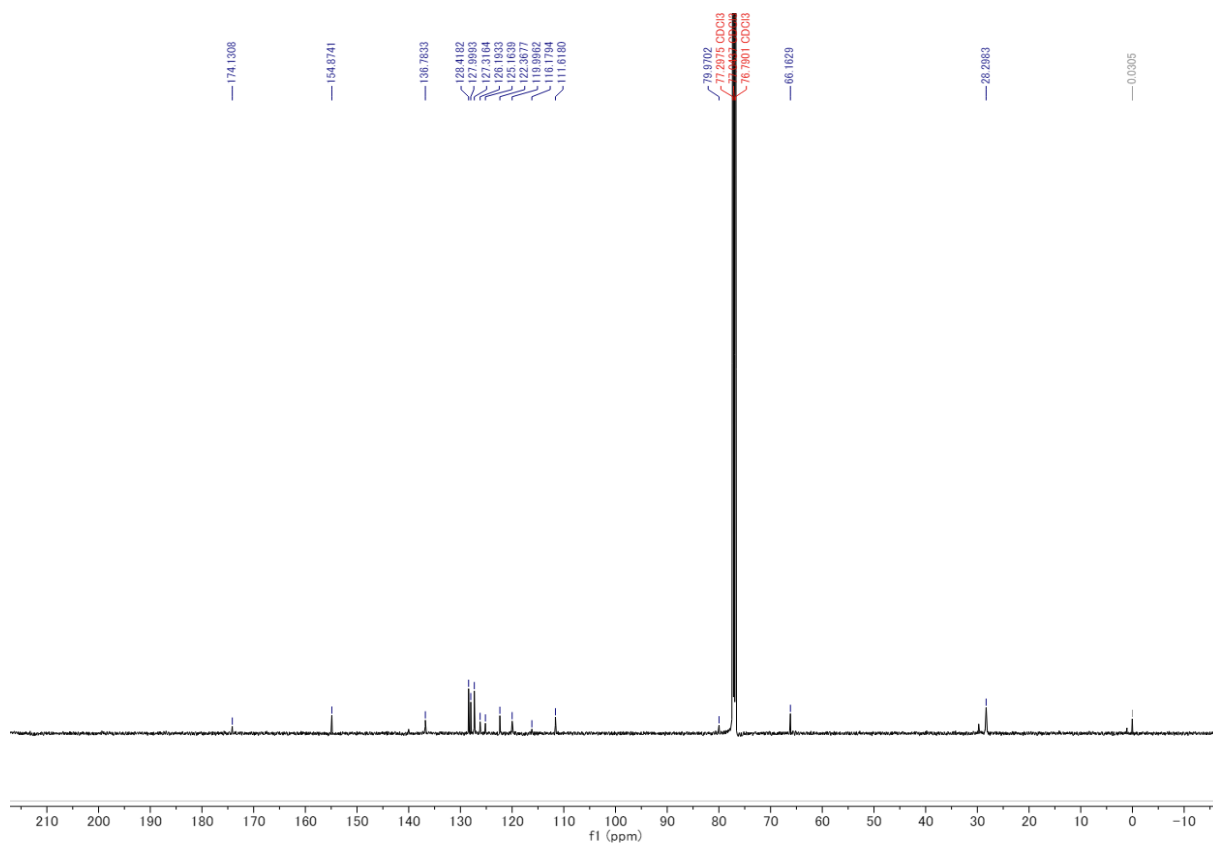



**(R)-2-(1H-Indol-3-yl)-2-(2-naphthyl)-2-(tert-butoxycarbonylamino)acetonitrile (6fa)**

<sup>1</sup>H NMR (CDCl<sub>3</sub>, 300 MHz)

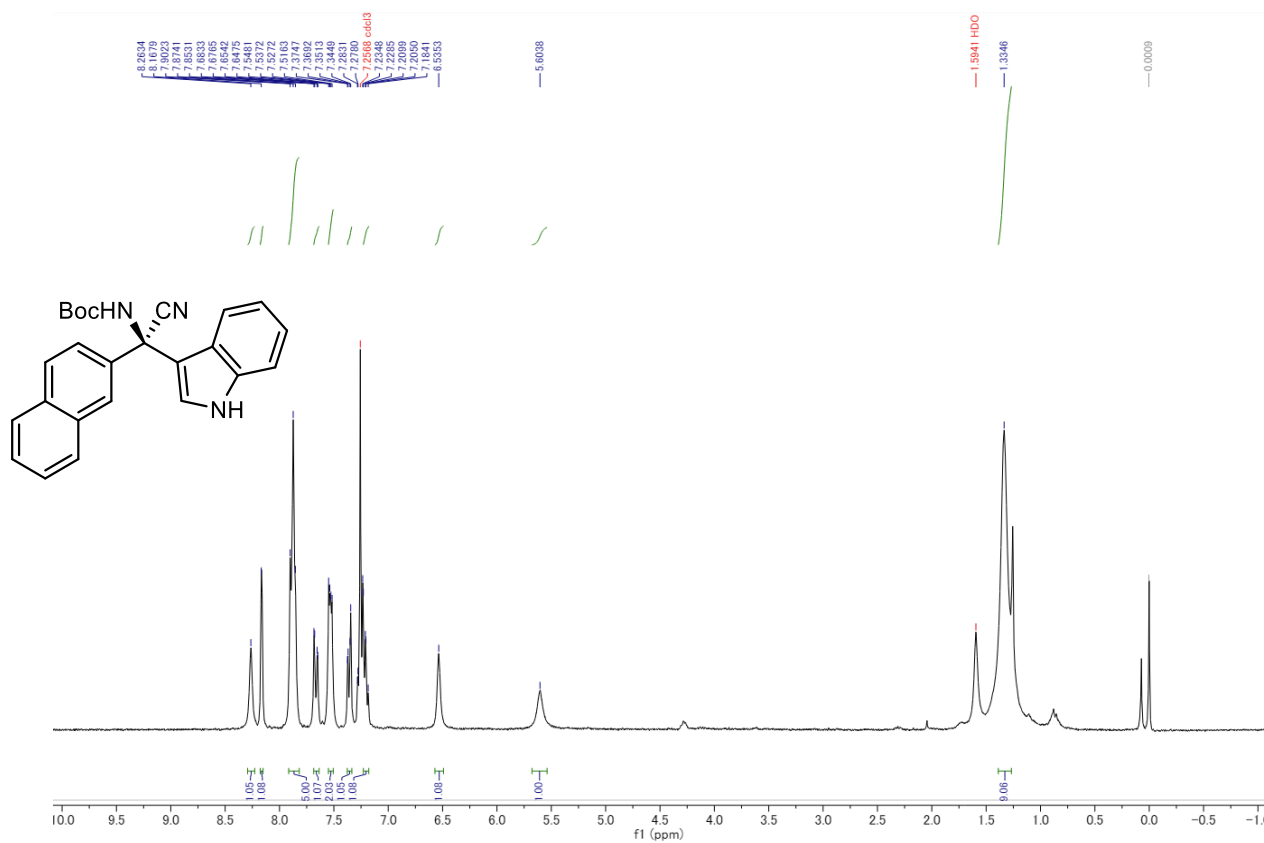

<sup>13</sup>C NMR (CDCl<sub>3</sub>, 125 MHz)

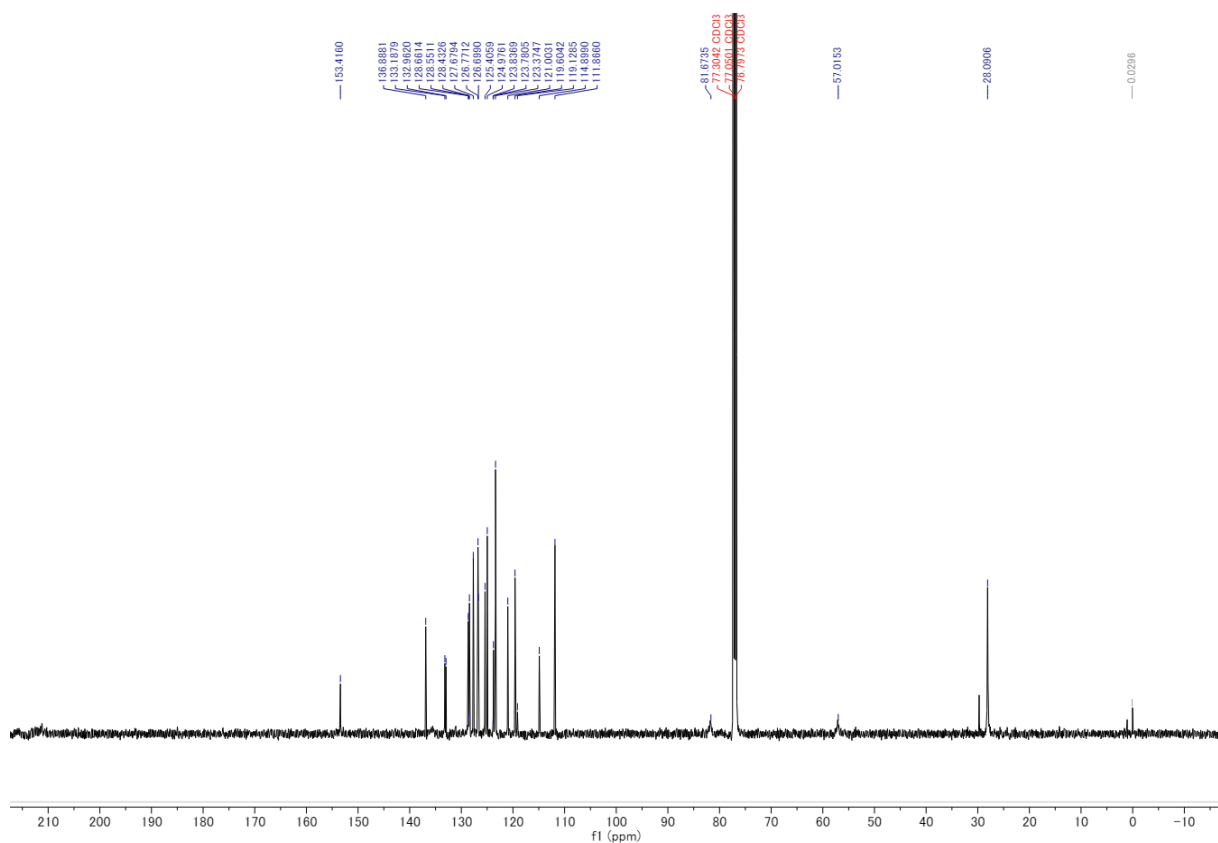

**(R)-2-(2-Methyl-1H-indol-3-yl)-2-phenyl-2-(tert-butoxycarbonylamino)acetonitrile (6ab)**

<sup>1</sup>H NMR (CDCl<sub>3</sub>, 300 MHz)

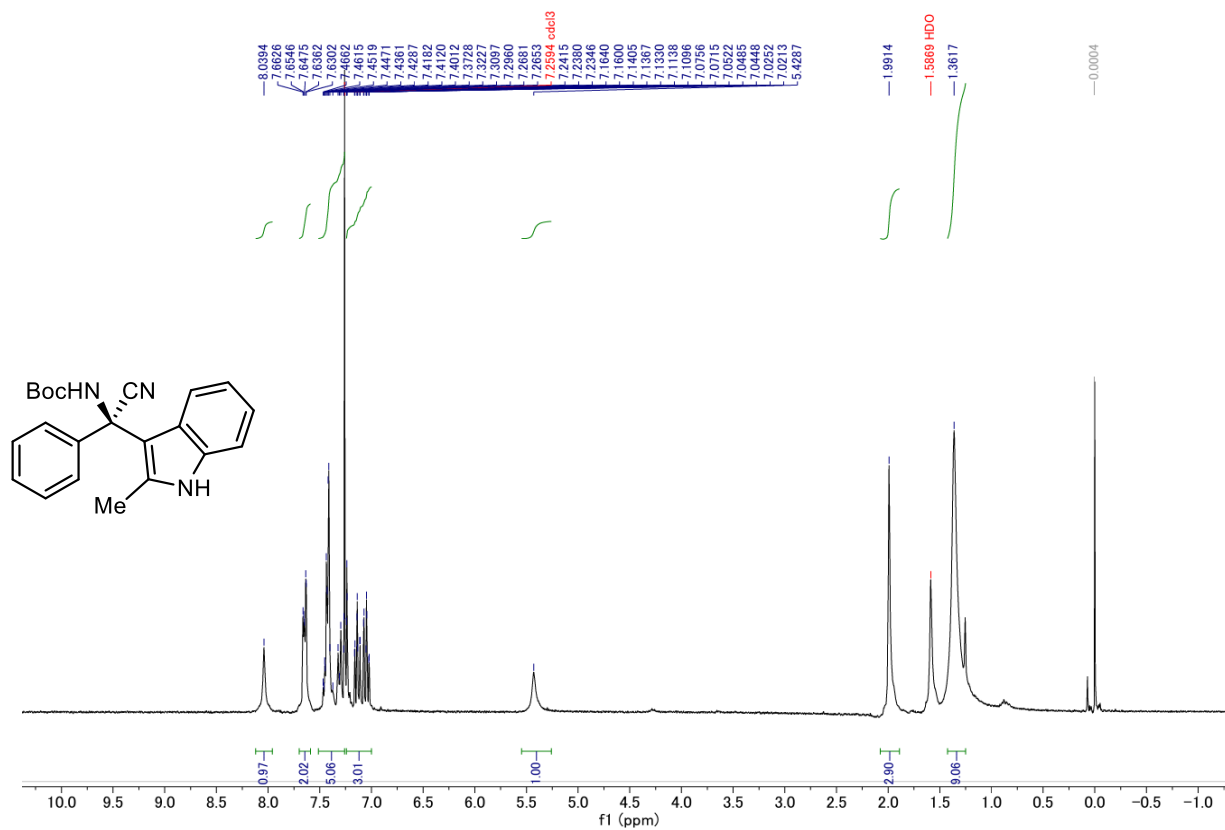

<sup>13</sup>C NMR (CDCl<sub>3</sub>, 125 MHz)

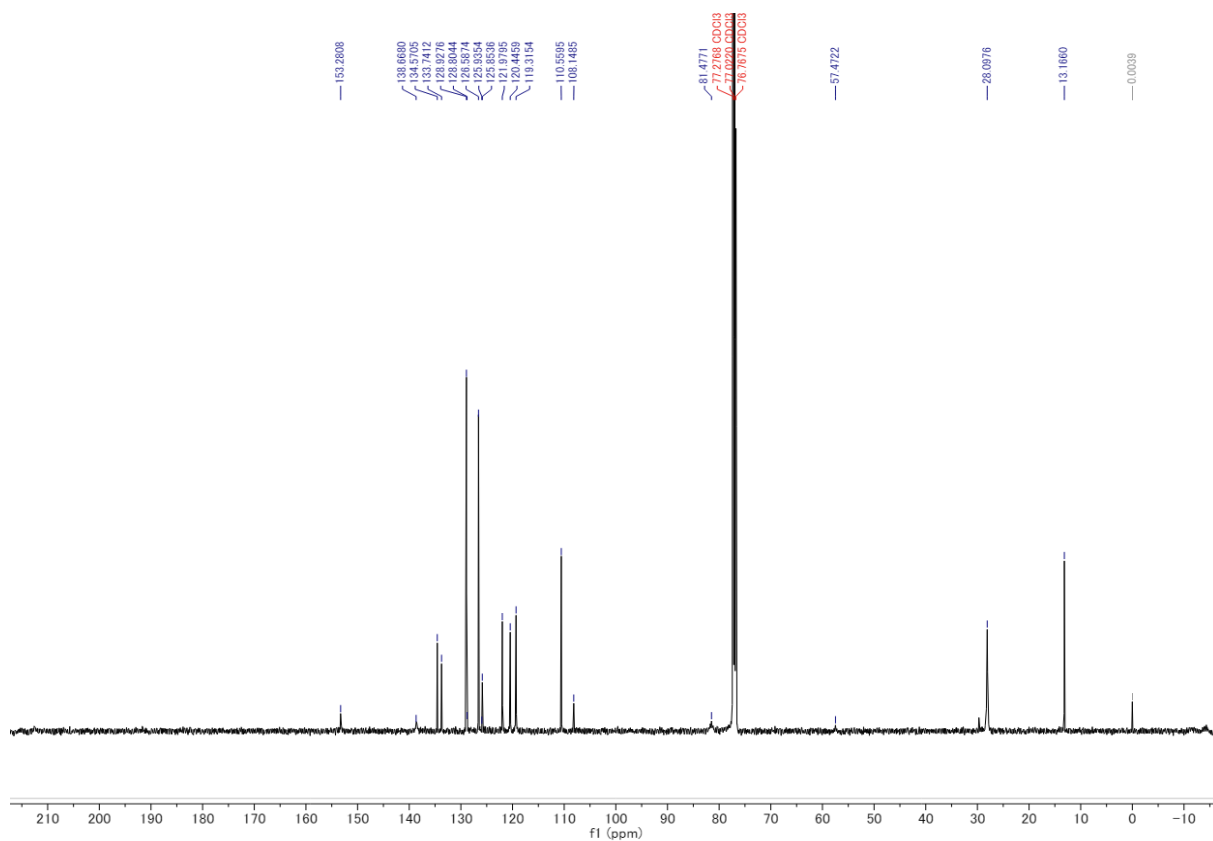

**(R)-2-Phenyl-2-(2-Phenyl-1H-indol-3-yl)-2-(tert-butoxycarbonylamino)acetonitrile (6ac)**

<sup>1</sup>H NMR (CDCl<sub>3</sub>, 300 MHz)

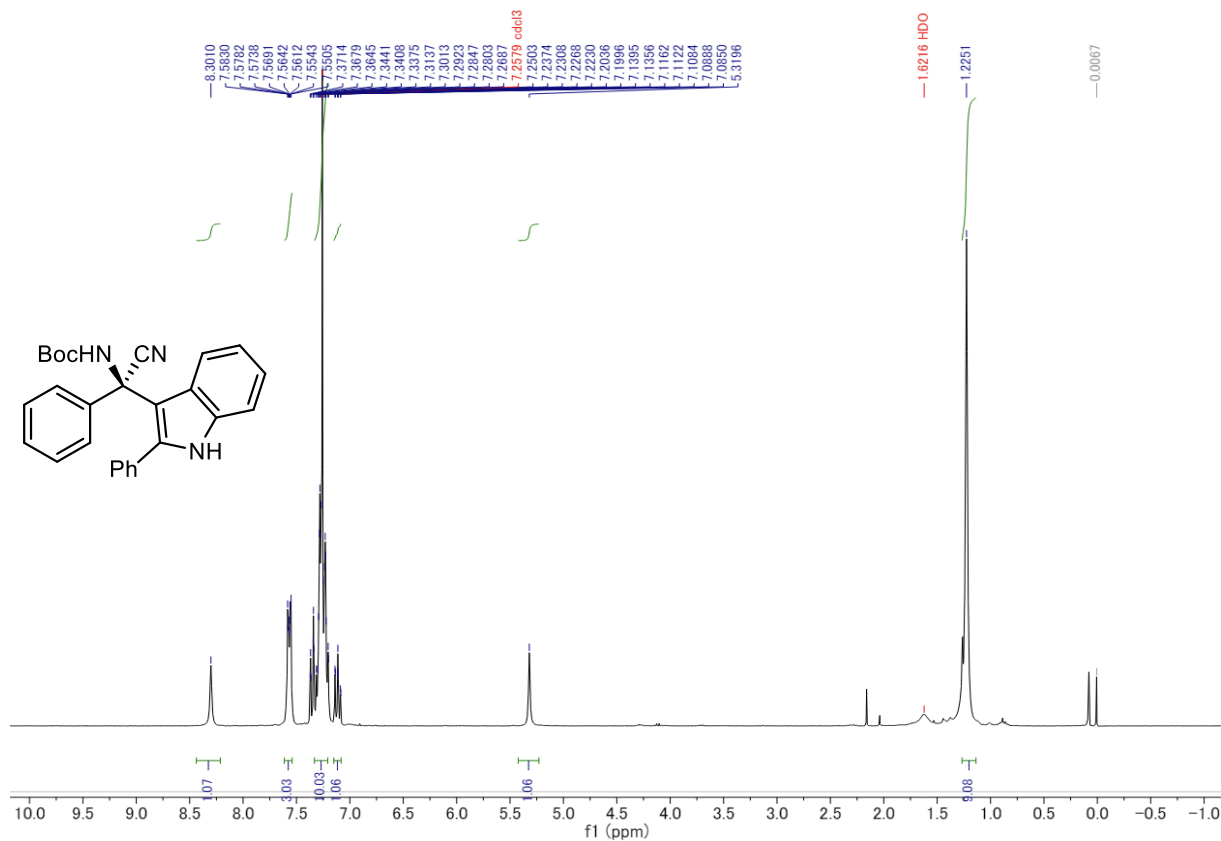

<sup>13</sup>C NMR (CDCl<sub>3</sub>, 125 MHz)

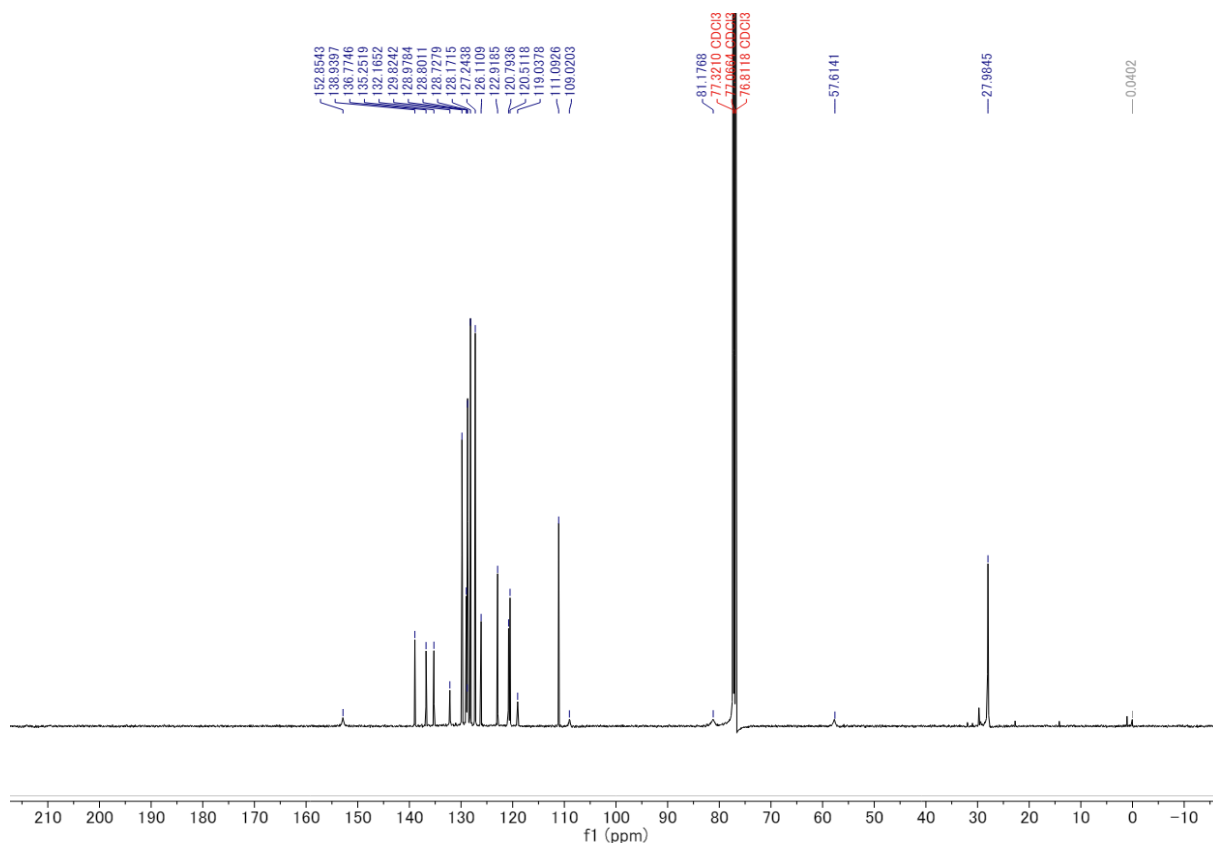

**(R)-2-(4-Methyl-1H-indol-3-yl)-2-phenyl-2-(tert-butoxycarbonylamino)acetonitrile (6ad)**

$^1\text{H}$  NMR ( $\text{CDCl}_3$ , 300 MHz)

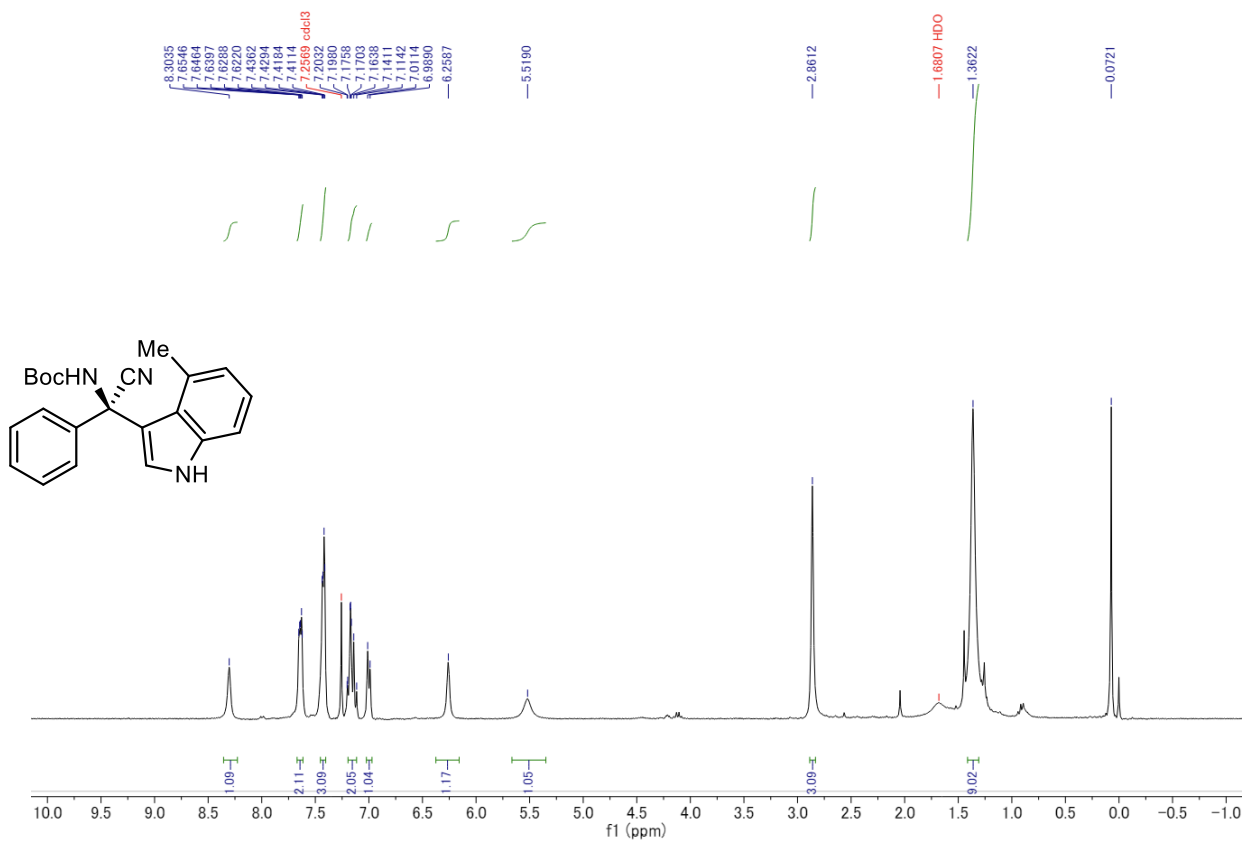

$^{13}\text{C}$  NMR ( $\text{CDCl}_3$ , 125 MHz)

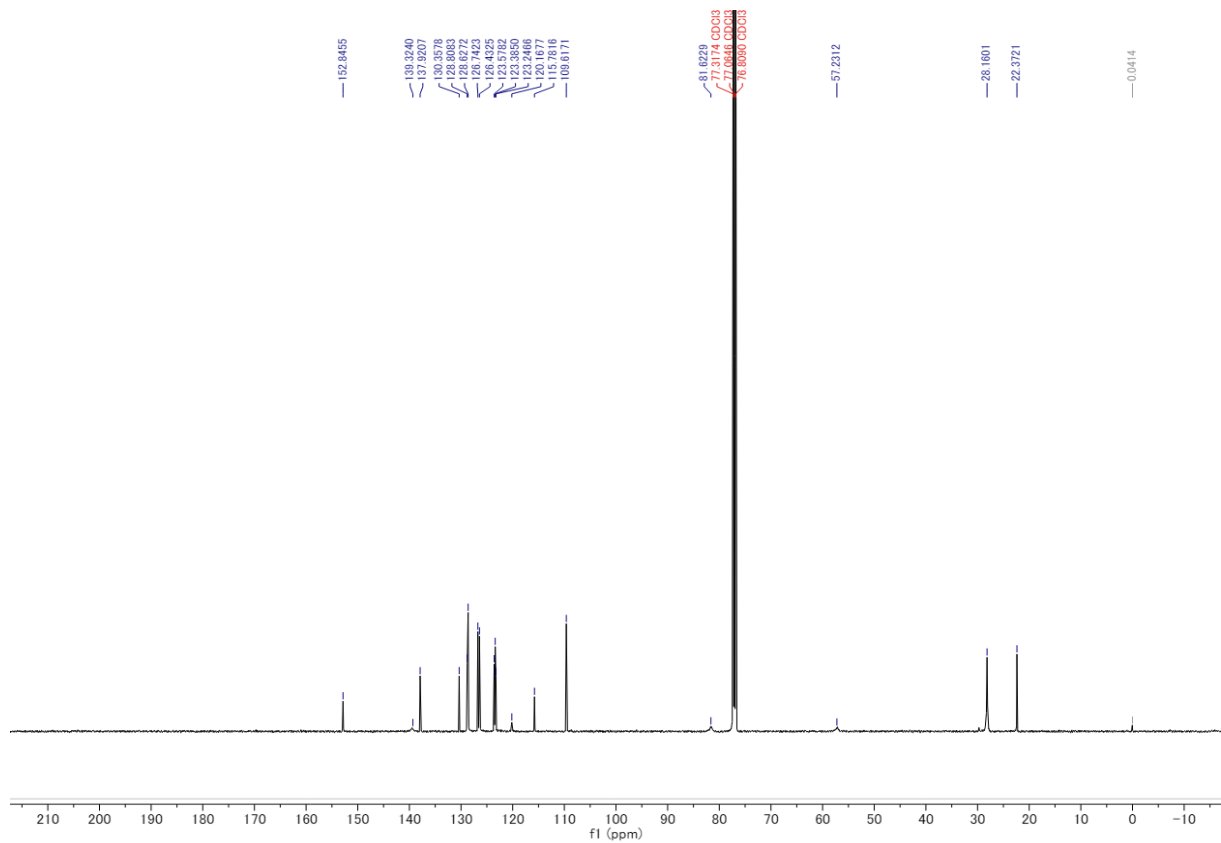

**(R)-2-(5-Bromo-1H-indol-3-yl)-2-phenyl-2-(tert-butoxycarbonylamino)acetonitrile (6ae)**

$^1\text{H}$  NMR ( $\text{CDCl}_3$ , 300 MHz)

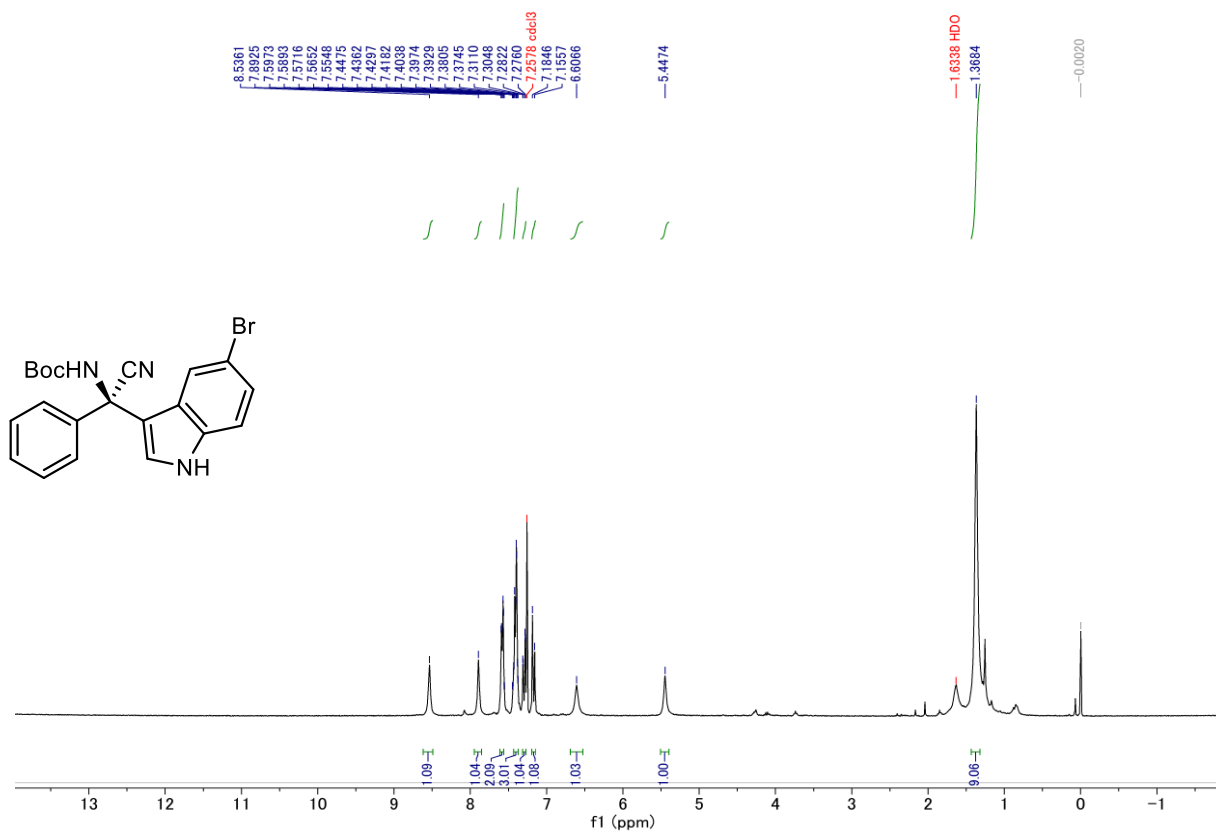

$^{13}\text{C}$  NMR ( $\text{CDCl}_3$ , 125 MHz)

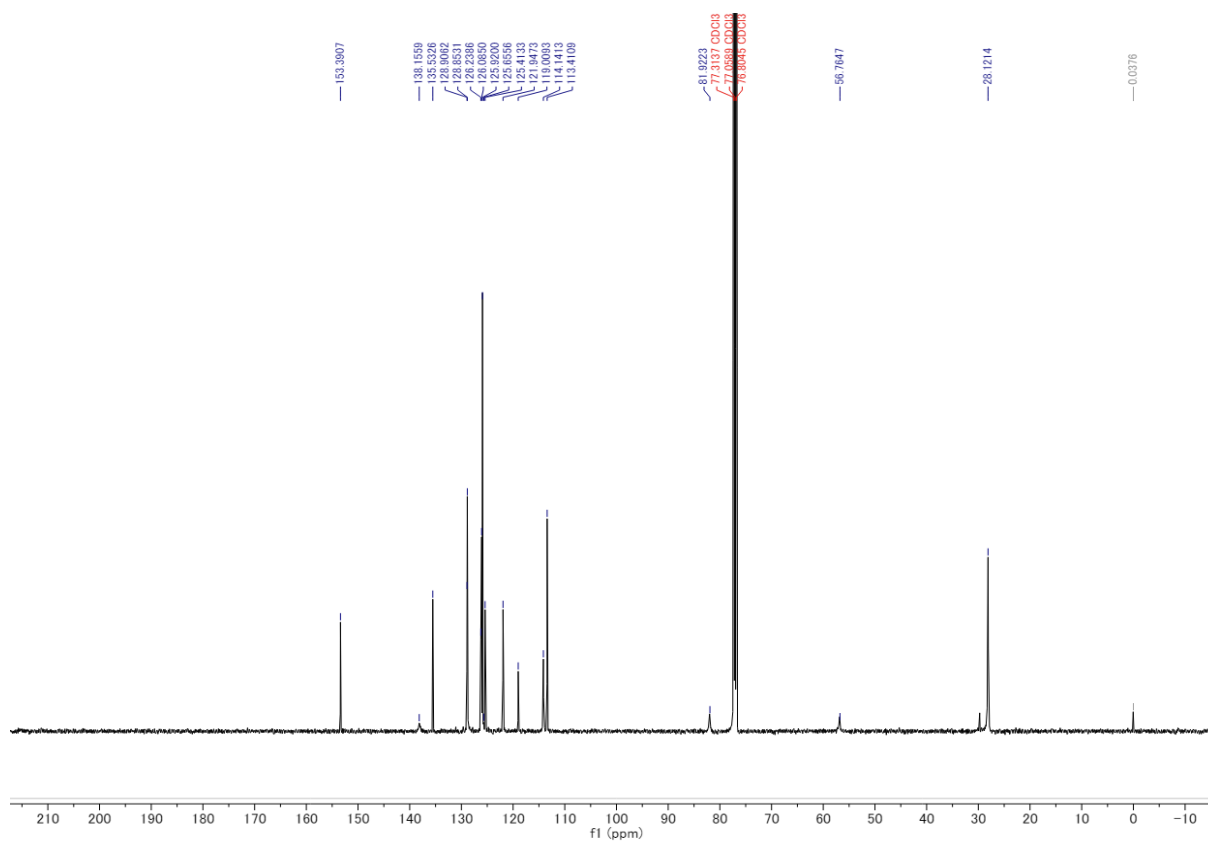

**(R)-2-(6-Chloro-1H-indol-3-yl)-2-phenyl-2-(tert-butoxycarbonylamino)acetonitrile (6af)**

<sup>1</sup>H NMR (CDCl<sub>3</sub>, 300 MHz)

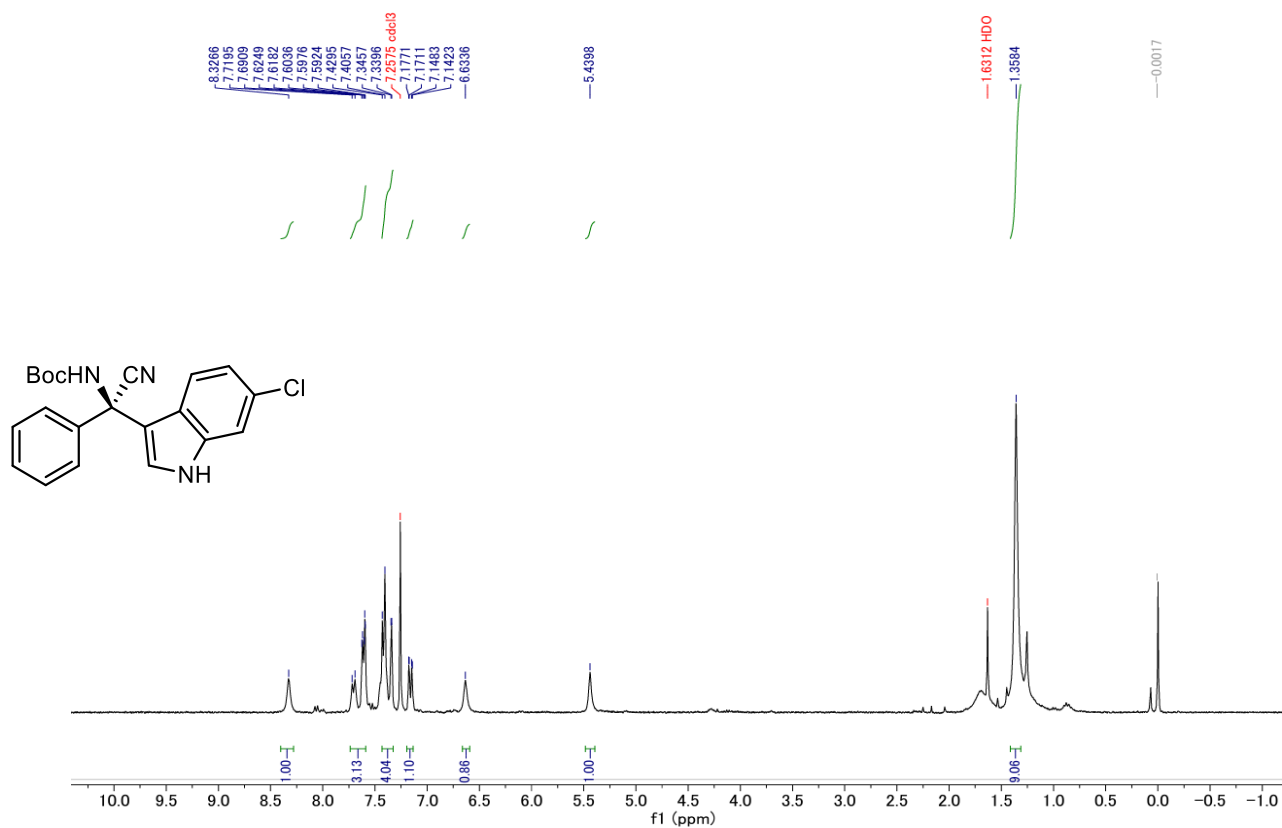

<sup>13</sup>C NMR (CDCl<sub>3</sub>, 125 MHz)

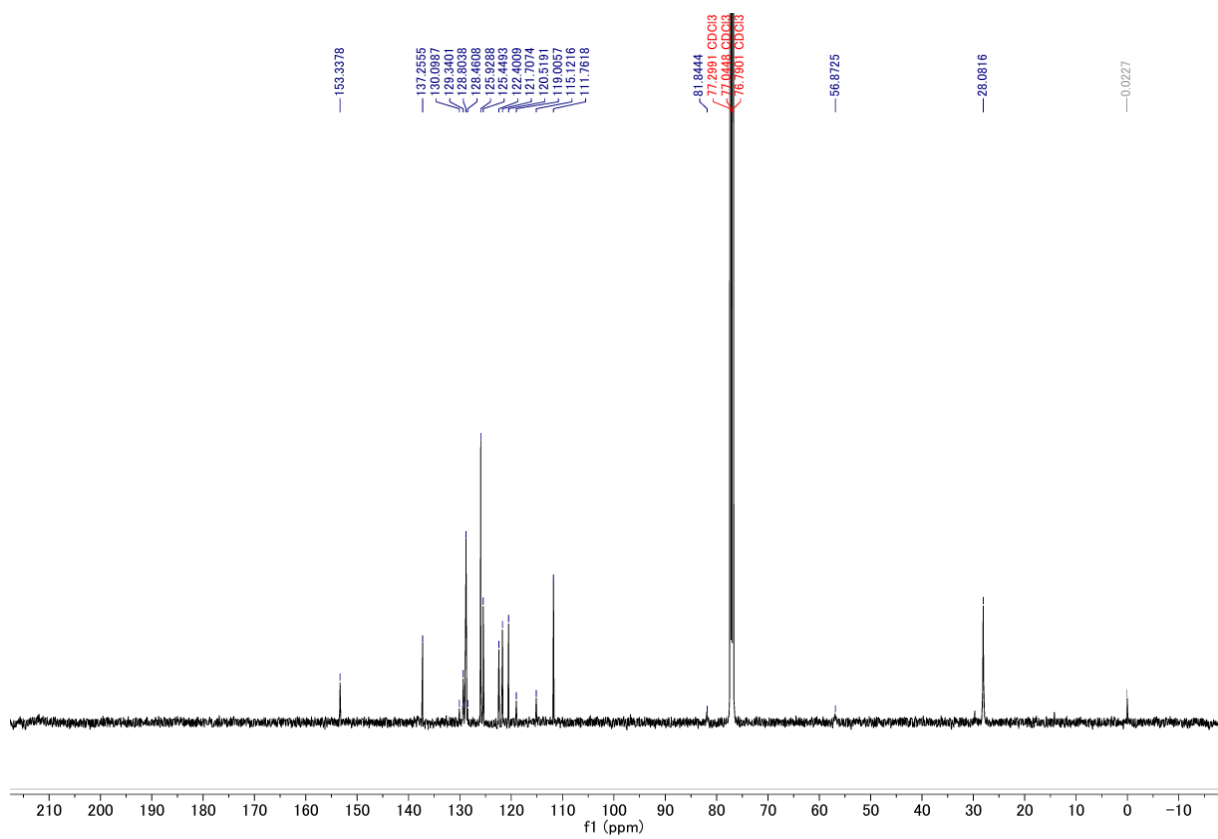

**(R)-2-(6-Methoxy-1H-indol-3-yl)-2-phenyl-2-(tert-butoxycarbonylamino)acetonitrile (6ag)**

$^1\text{H}$  NMR ( $\text{CDCl}_3$ , 300 MHz)

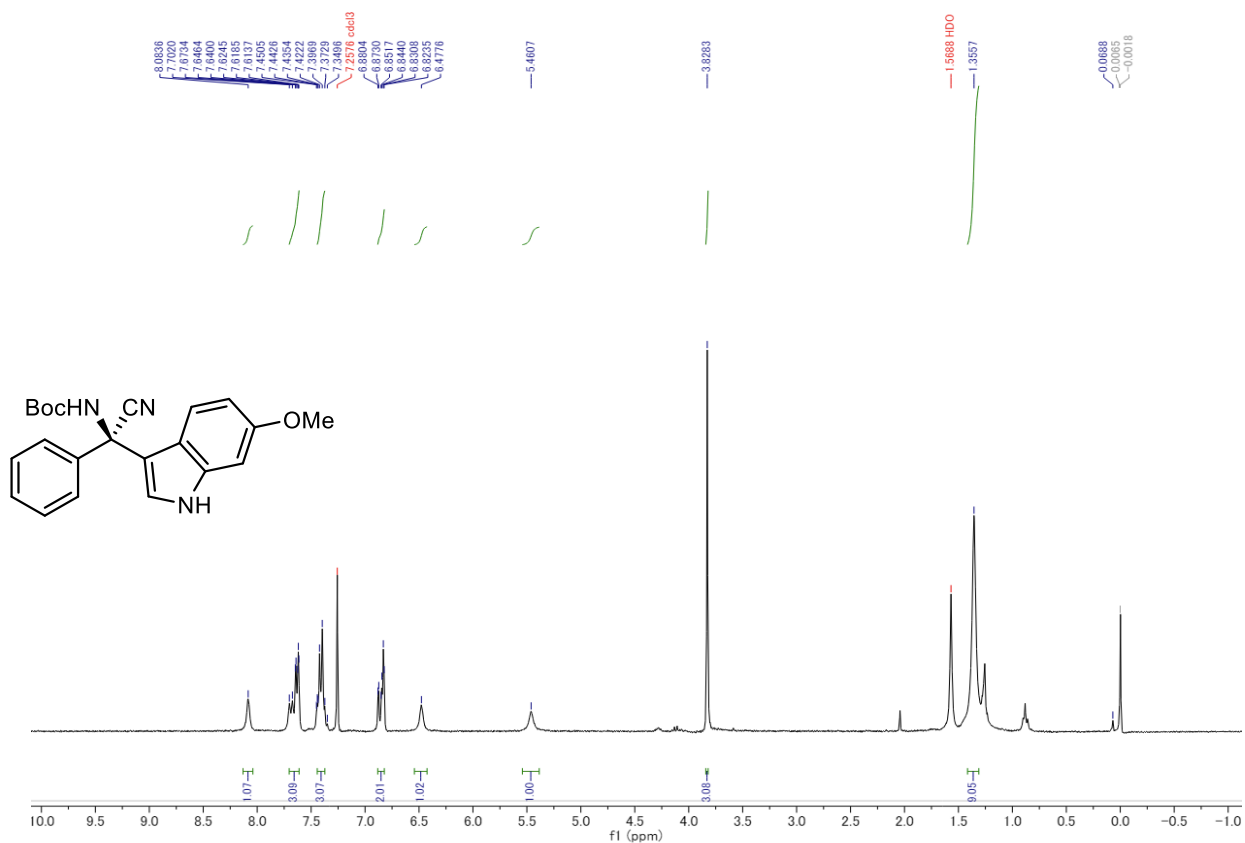

$^{13}\text{C}$  NMR ( $\text{CDCl}_3$ , 125 MHz)

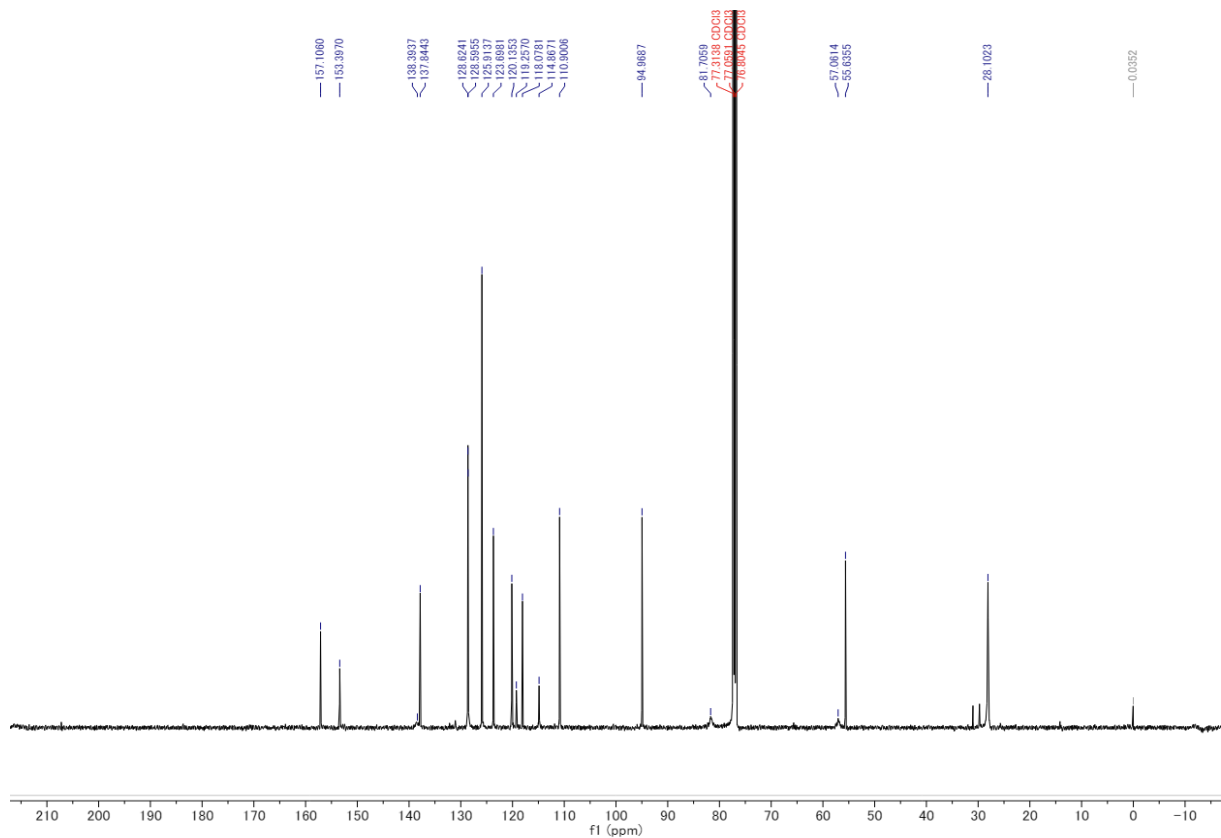

**(R)-2-(3-Methyl-1H-indol-2-yl)-2-phenyl-2-(tert-butoxycarbonylamino)acetonitrile (6ah)**

<sup>1</sup>H NMR (CDCl<sub>3</sub>, 300 MHz)

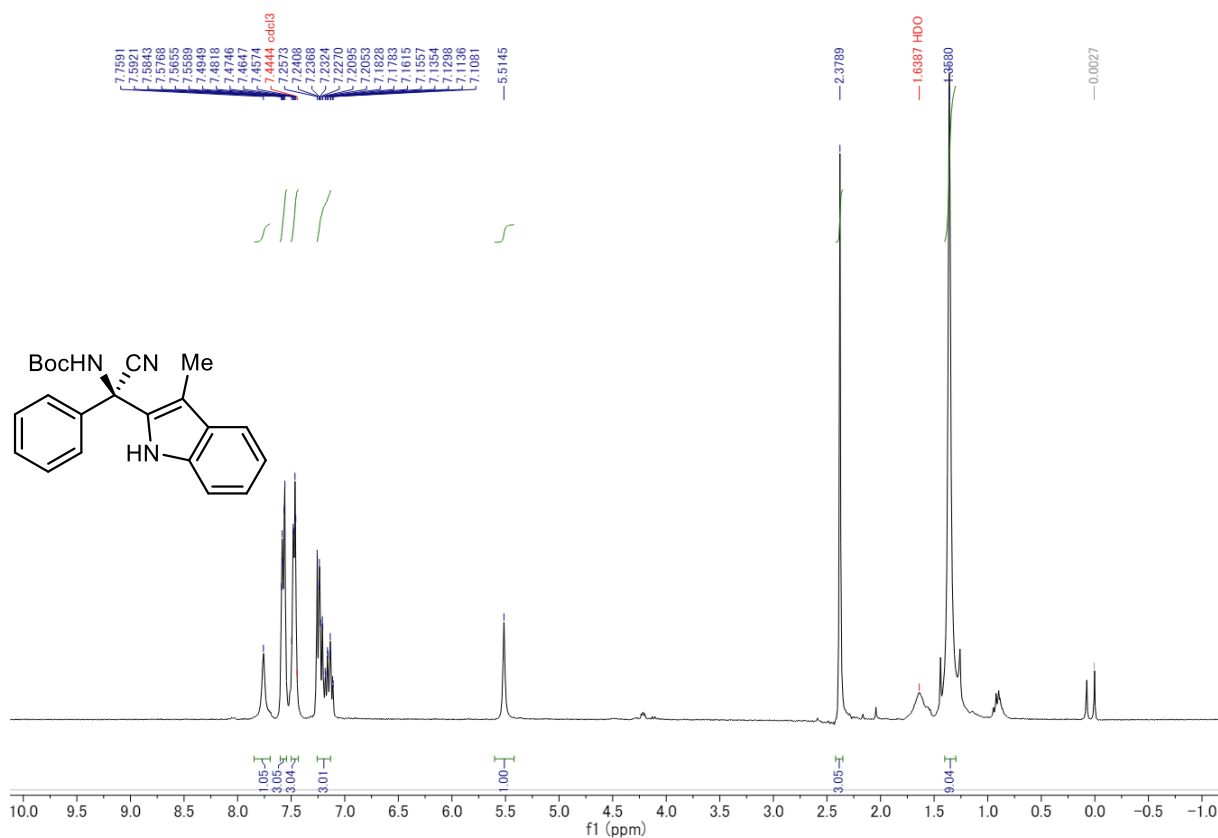

<sup>13</sup>C NMR (CDCl<sub>3</sub>, 125 MHz)

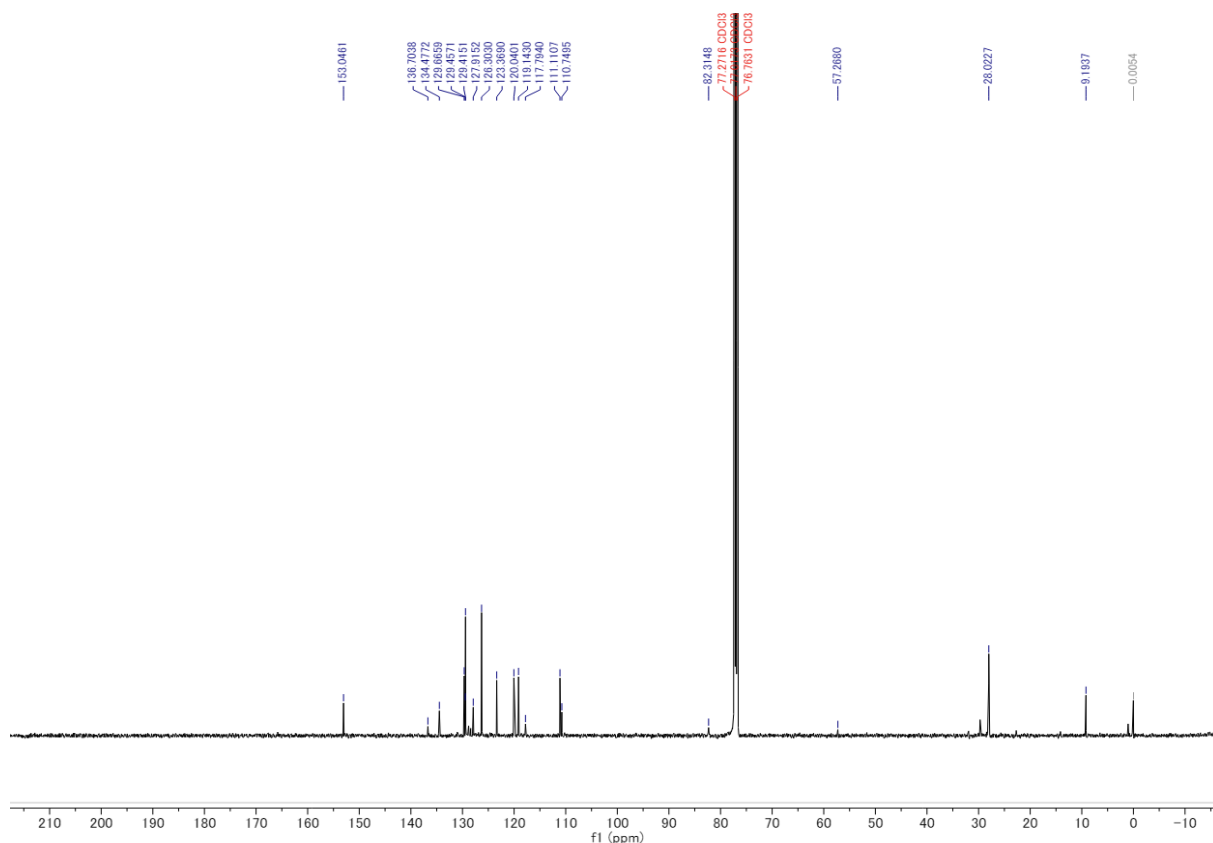



**(R)-2-(3-Methyl-1H-indol-2-yl)-2-(4-bromophenyl)-2-(tert-butoxycarbonylamino)acetonitrile (6ai)**

<sup>1</sup>H NMR (CDCl<sub>3</sub>, 300 MHz)

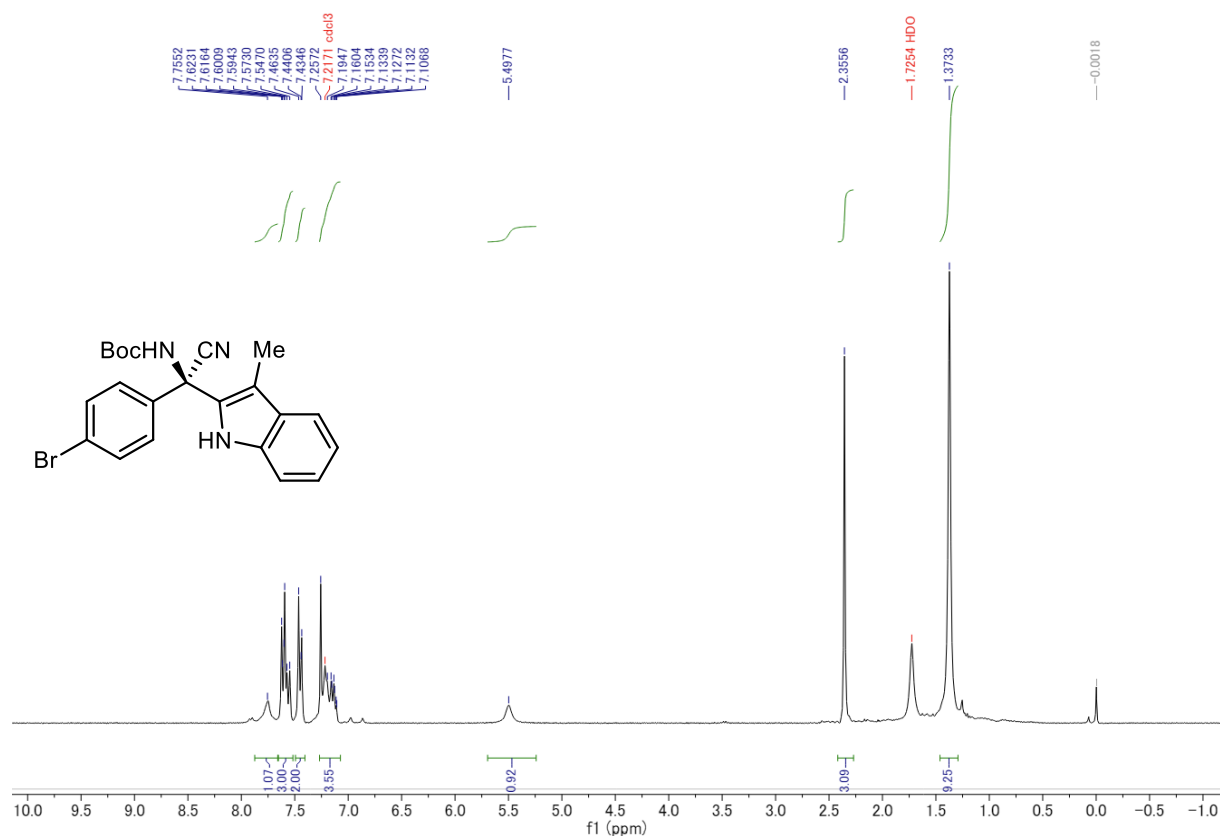

<sup>13</sup>C NMR (CDCl<sub>3</sub>, 125 MHz)

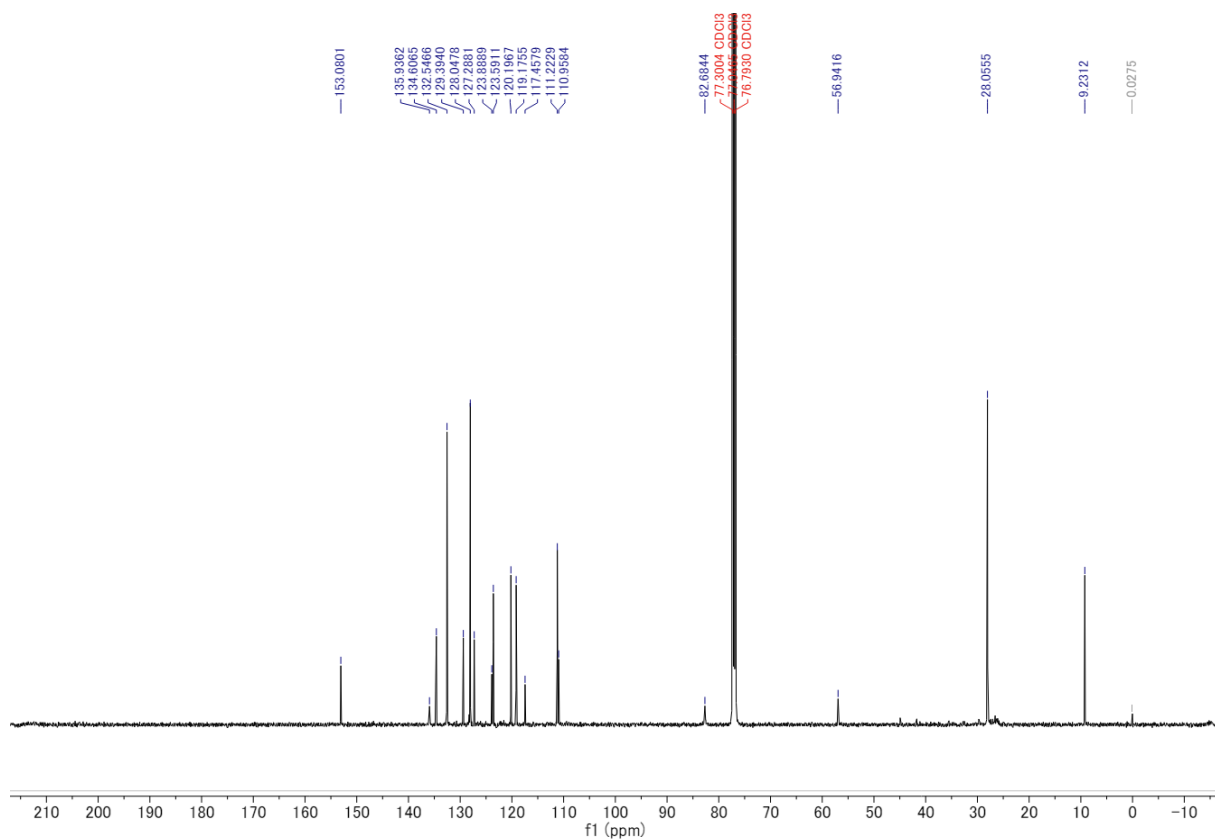

**(R)-2-(1H-Indazol-3-yl)-2-phenyl-2-(tert-butoxycarbonylamino)acetonitrile (6ak)**

<sup>1</sup>H NMR (CDCl<sub>3</sub>, 300 MHz)

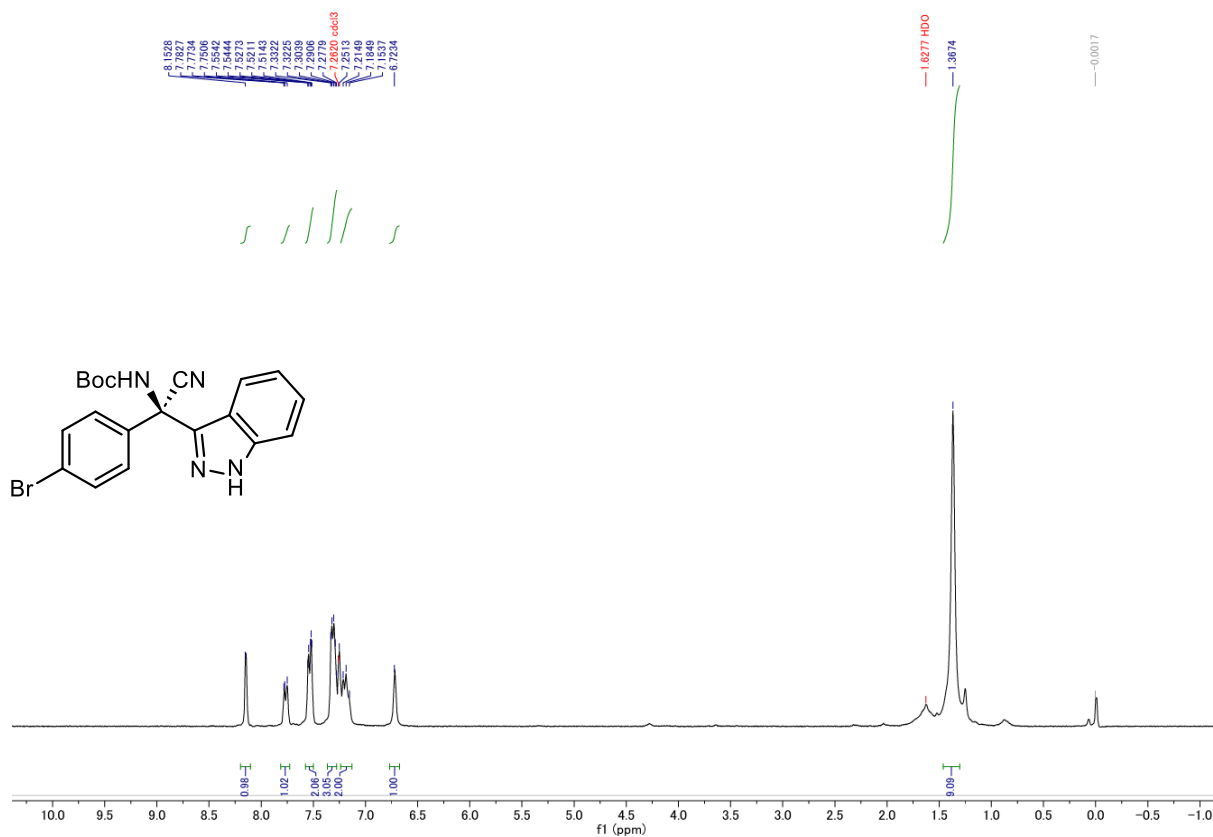

<sup>13</sup>C NMR (CDCl<sub>3</sub>, 125 MHz)

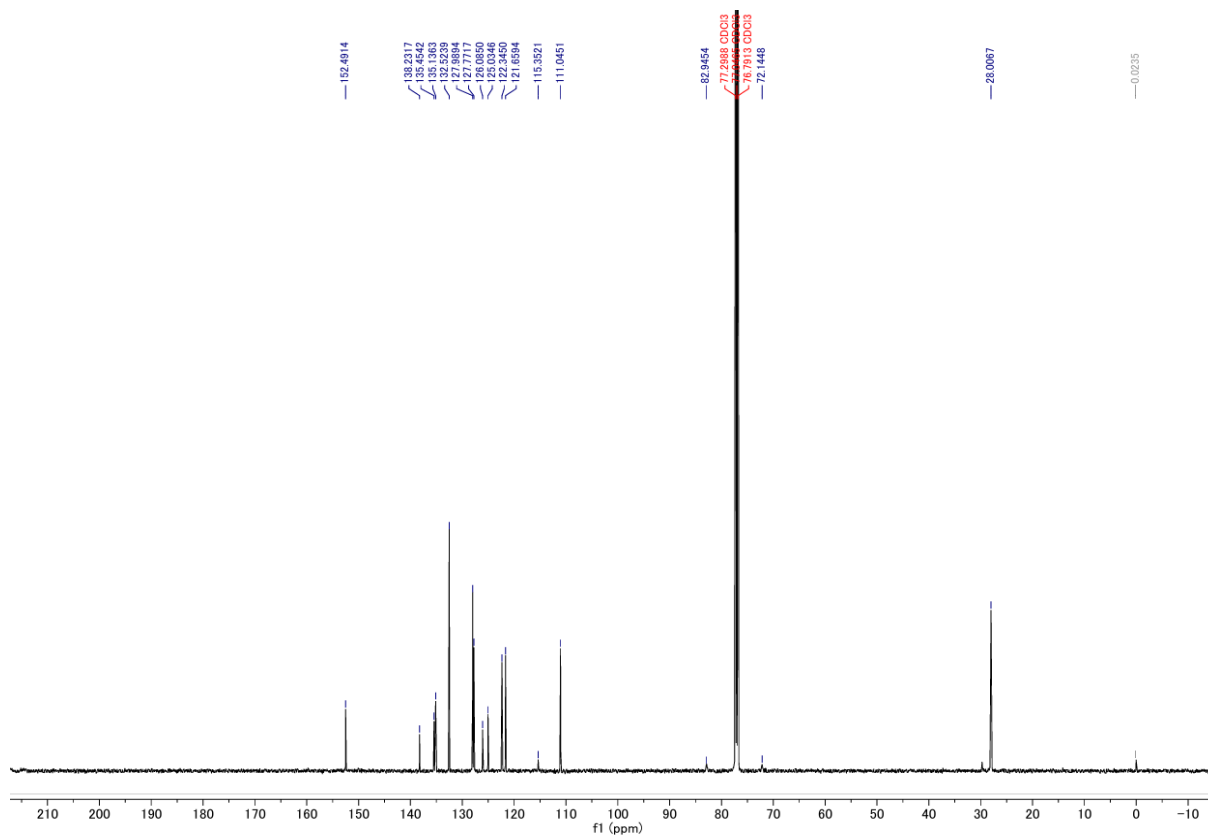

**(R)-2-(6-Hydroxybenzo[d][1,3]dioxol-5-yl)-2-(4-bromophenyl)-2-(tert-butoxycarbonylamino)acetonitrile (6al)**

<sup>1</sup>H NMR (CDCl<sub>3</sub>, 300 MHz)

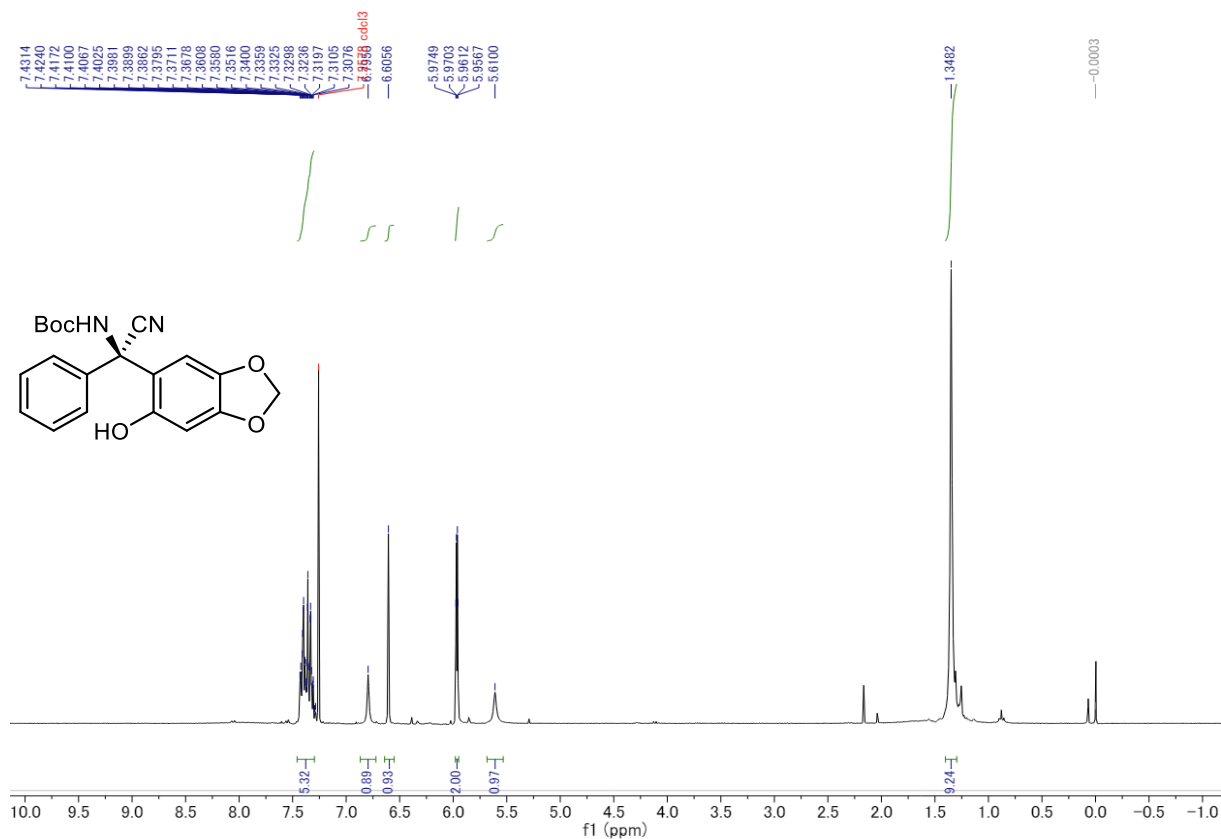

<sup>13</sup>C NMR (CDCl<sub>3</sub>, 125 MHz)

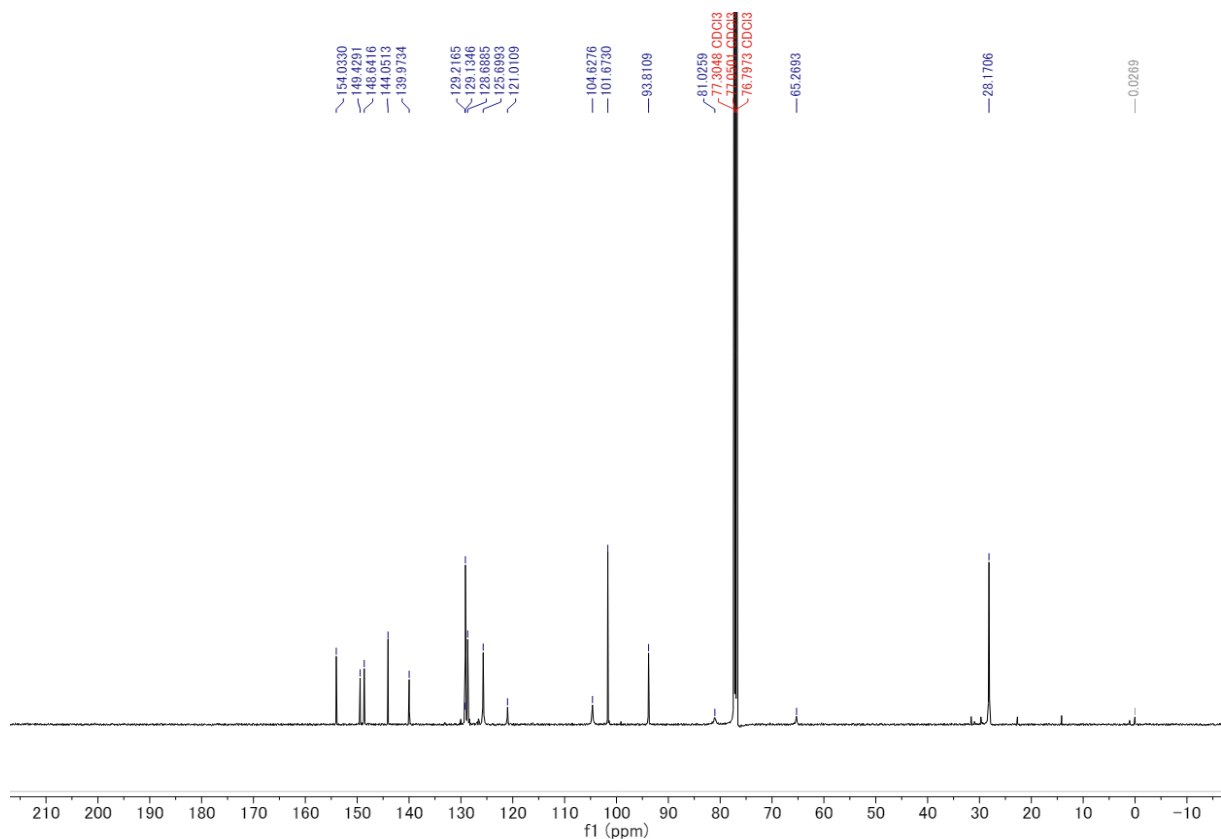

**(R)-2-(1-Hydroxynaphthalen-2-yl)-2-phenyl-2-(tert-butoxycarbonylamino)acetonitrile (6am)**

<sup>1</sup>H NMR (CDCl<sub>3</sub>, 300 MHz)

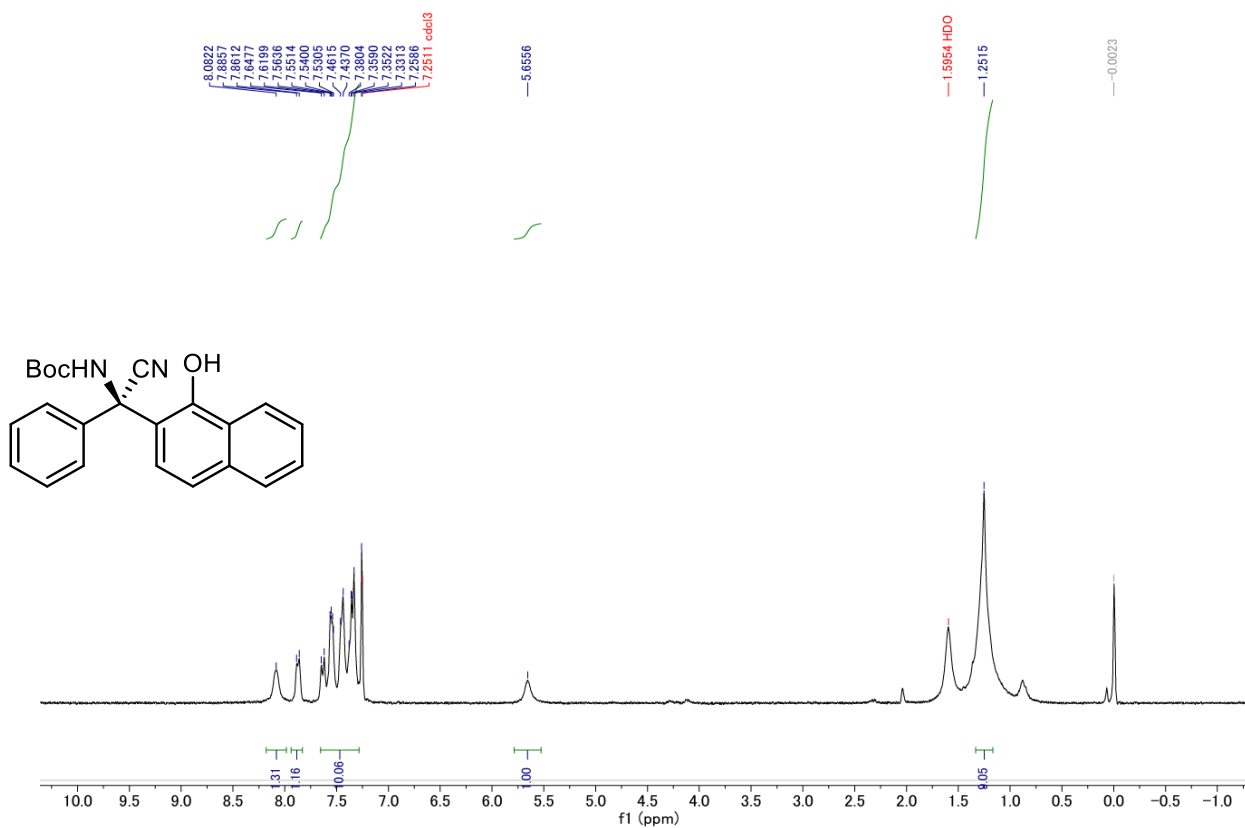

<sup>13</sup>C NMR (CDCl<sub>3</sub>, 125 MHz)

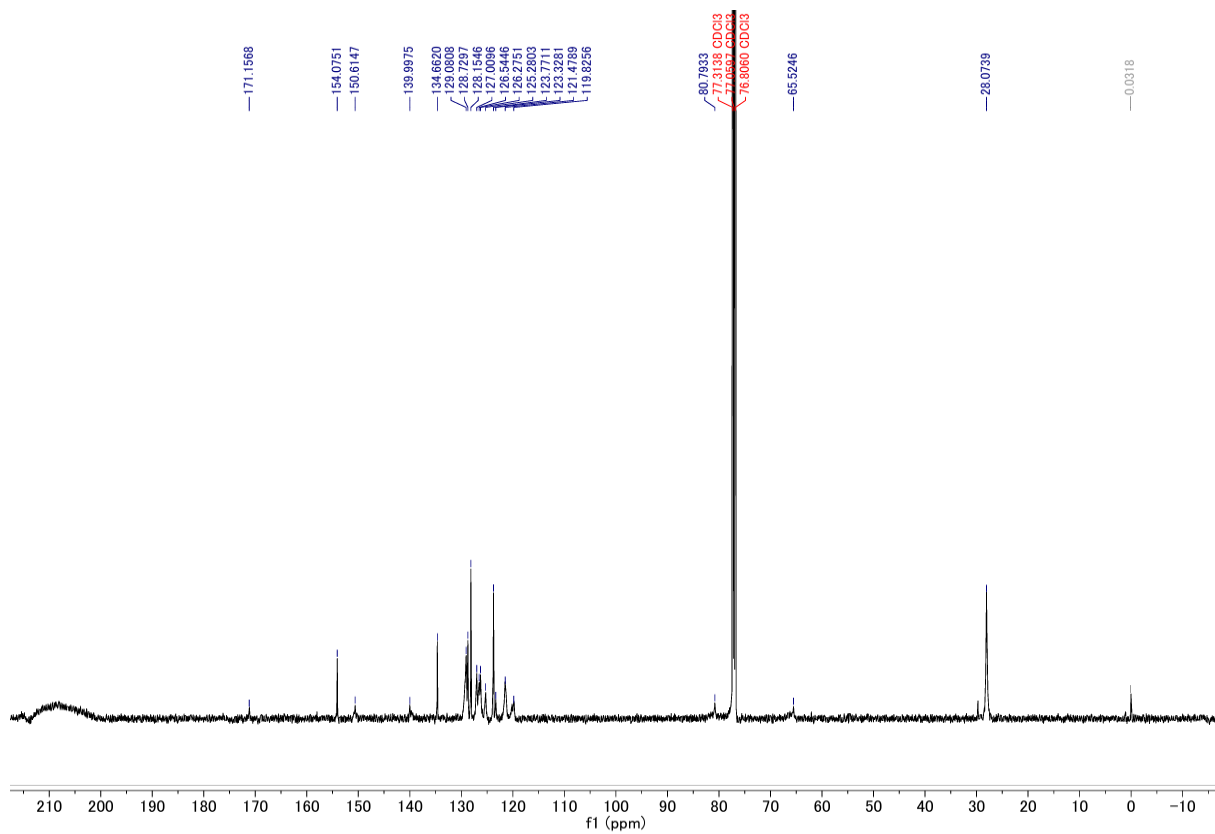

H-H COSY NMR (CDCl<sub>3</sub>, 125 MHz)

In order to confirm the reaction position of 1-naphthol (2-position) with iminonitrile, we conduct H-H COSY NMR.

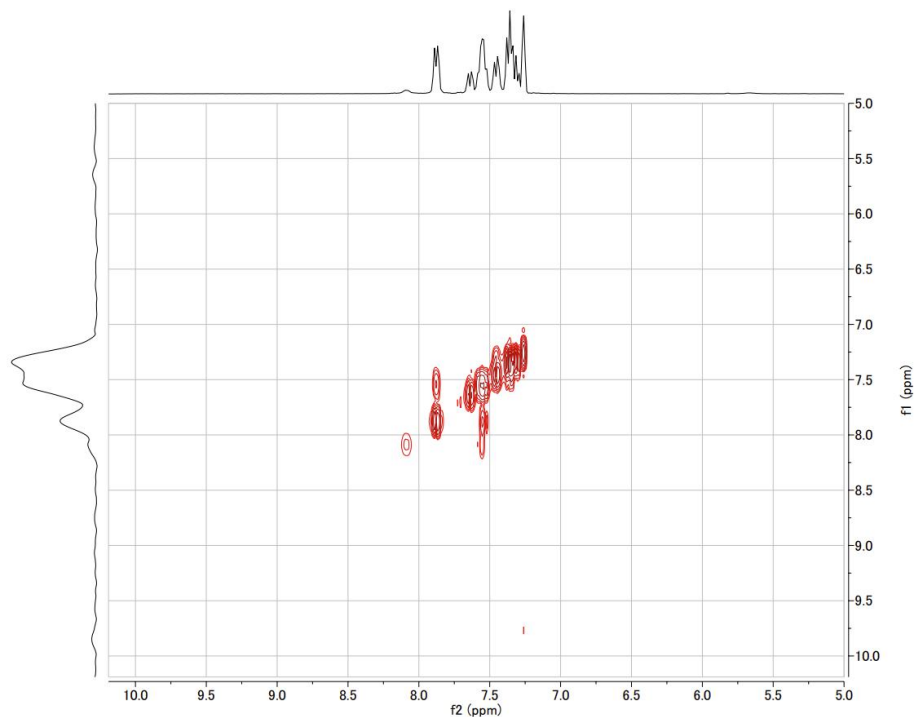

We also compared our spectrum to Friedel-Crafts products of 1-naphthol in the following literature, we conclude 2-position of naphthol is functionalized in this study.

P. E. Georghiou, M. Ashram, *J. Org. Chem.* **1995**, *60*, 2909–2911.

J. Hill, W. Tam, *J. Org. Chem.* **2019**, *84*, 8309–8314.

**(R)-2-(1H-Indol-3-yl)-2-phenyl-2-(tert-butoxycarbonylamino)acetamide (7)**

<sup>1</sup>H NMR (CDCl<sub>3</sub>, 300 MHz)

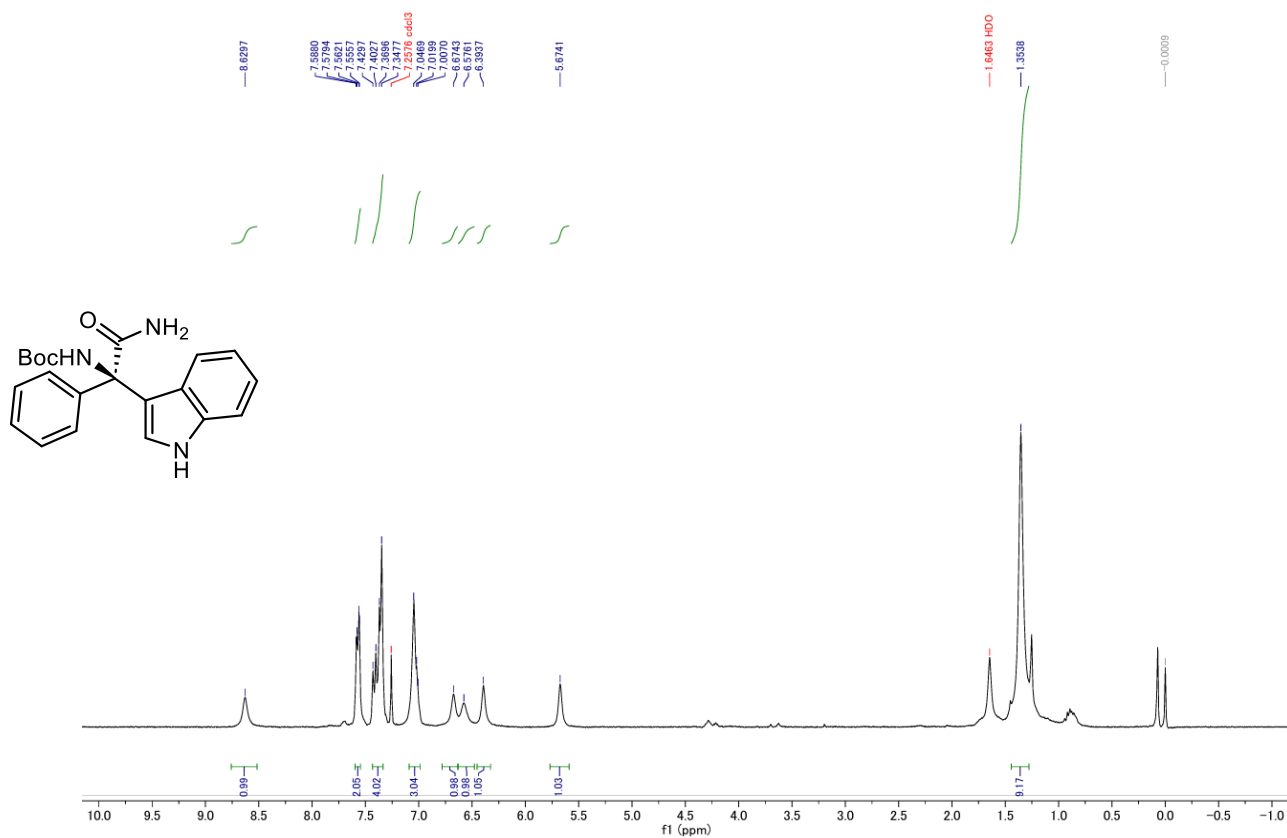

<sup>13</sup>C NMR (CDCl<sub>3</sub>, 125 MHz)

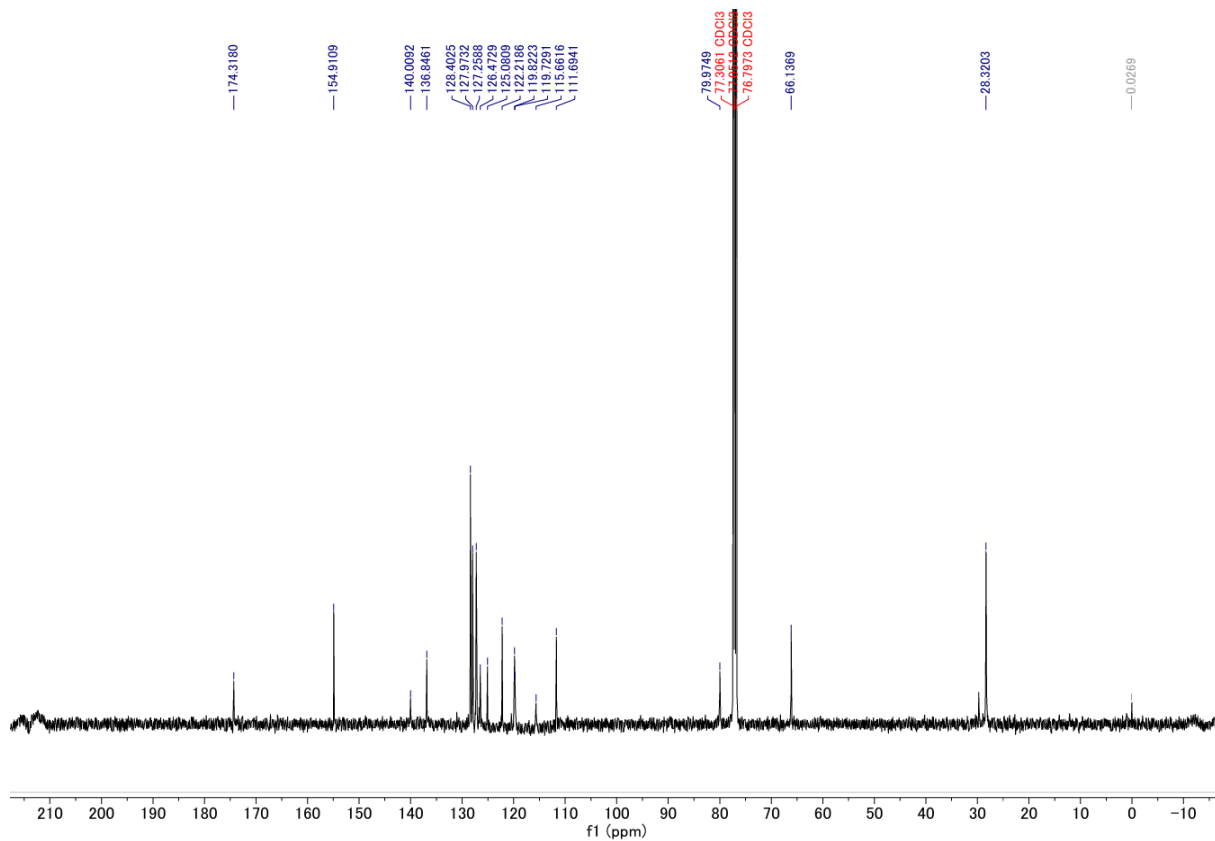

Supplement: d4qo02362e1.pdf [file d4qo02362e1.pdf]
